# Supplementary material for: Ribosome profiling reveals translatome remodeling in cancer cells in response to zinc oxide nanoparticles
Source: Aging (Albany NY). 2021 Oct 7;13(19):23119–32. doi: 10.18632/aging.203606 (PMC8544296; doi:10.18632/aging.203606)
Supplement: Supplementary Table 2 [file aging-13-203606-s003.xlsx]

## Sheet: merge
ENST	gene.name.x	X7.1rpkm	X7.2rpkm	X10.1rpkm	X10.2rpkm	baseMean	log2FoldChange.x	lfcSE.x	stat.x	pvalue.x	padj.x	gene.name.y	TG1	TG2	CT1	CT2	Reads	log2FoldChange.y	lfcSE.y	stat.y	pvalue.y	padj.y
ENST00000000233	ARF5	68.0198	62.6324	52.5075	58.7112	672.431	-0.208299	0.0918923	-2.26677	0.0234041	0.18772	ARF5	319.744	333.554	280.093	265.419	710.584	-0.114986	0.0873797	-1.31593	0.188196	0.358206
ENST00000000412	M6PR	68.7772	65.6389	69.4384	73.0345	1829.15	0.108017	0.0541546	1.99461	0.0460852	0.298863	M6PR	346.46	343.356	112.006	111.116	809.957	-1.50971	0.0873972	-17.2742	7.36e-67	5.81e-65
ENST00000001008	FKBP4	79.673	81.6931	90.033	92.0061	3440.76	0.197953	0.0384127	5.15331	2.56e-07	9.74e-06	FKBP4	208.781	211.184	263.397	268.045	1443.33	0.483603	0.0615004	7.86341	3.74e-15	5.98e-14
ENST00000001146	CYP26B1	1.22613	1.01885	1.10963	0.932028	54.6592	-0.112959	0.306833	-0.368145	0.712765	0.959777	CYP26B1	8.83512	9.04147	3.78732	3.79852	42.6967	-1.01555	0.35466	-2.86346	0.00419042	0.0166075
ENST00000002125	NDUFAF7	9.4665	9.9899	12.1652	10.722	249.46	0.258333	0.145993	1.76948	0.0768131	0.404579	NDUFAF7	24.7759	23.6981	29.4412	26.077	154.071	0.312649	0.180356	1.73351	0.0830055	0.194176
ENST00000002165	FUCA2	37.3473	35.0501	36.1058	34.4745	919.143	-0.0126485	0.0760433	-0.166333	0.867895	0.979578	FUCA2	85.2409	84.7086	18.5949	19.1931	310.998	-1.99745	0.144081	-13.8633	1.06e-43	4.88e-42
ENST00000002596	HS3ST1	0.365223	0.467922	0.220003	0.395982	27.9349	-0.411564	0.442075	-0.930983	0.351862	0.804309	HS3ST1	5.21385	5.02631	7.14017	9.64021	27.1857	0.808756	0.43526	1.8581	0.0631551	0.157304
ENST00000002829	SEMA3F	2.89992	3.33023	2.73673	2.59101	112.307	-0.201689	0.216085	-0.93338	0.350624	0.80325	SEMA3F	2.03905	1.2509	2.7924	3.6624	25.6785	1.04728	0.456429	2.29451	0.0217614	0.066733
ENST00000003100	CYP51A1	41.3903	41	42.3388	41.9368	1417.62	0.0566764	0.0595006	0.952535	0.340826	0.798499	CYP51A1	106.099	100.318	76.8553	78.5779	602.162	-0.274631	0.0953068	-2.88155	0.00395723	0.0158149
ENST00000003302	USP28	10.0114	10.221	10.1214	11.2003	523.123	0.0997063	0.10091	0.988071	0.323118	0.783516	USP28	10.5973	11.1364	10.0983	11.6984	154.074	0.150152	0.18052	0.831775	0.405536	0.602276
ENST00000004531	SLC7A2	8.42049	8.40931	9.00128	8.59792	701.774	0.0885264	0.0855379	1.03494	0.300698	0.764163	SLC7A2	5.48373	4.52191	1.08708	1.33258	27.8861	-1.93916	0.479916	-4.04063	5.33e-05	0.000323112
ENST00000005178	PDK4	14.1606	15.7031	10.8194	10.7021	498.127	-0.44857	0.104998	-4.27217	1.94e-05	0.000503481	PDK4	67.5616	61.4364	43.0776	45.6739	294.326	-0.388576	0.133025	-2.92108	0.00348822	0.0141644
ENST00000005257	RALA	9.96928	10.8191	10.7012	10.0977	312.44	0.0247727	0.129743	0.190938	0.848574	0.977985	RALA	70.2692	68.097	84.3089	84.1479	209.886	0.407828	0.152959	2.66626	0.00767012	0.0279733
ENST00000005260	BAIAP2L1	18.7875	18.3607	19.1591	20.1951	751.881	0.107264	0.0829467	1.29317	0.195952	0.650612	BAIAP2L1	78.1736	76.0421	56.096	59.5715	456.06	-0.273432	0.106902	-2.55777	0.0105346	0.0365787
ENST00000005286	TMEM132A	14.2303	14.7698	10.9541	10.9836	477.296	-0.378597	0.104577	-3.62026	0.000294307	0.00564095	TMEM132A	26.0976	23.6311	16.4666	14.4509	269.757	-0.586363	0.140474	-4.17418	2.99e-05	0.000191374
ENST00000005340	DVL2	17.7709	18.1528	14.7211	15.7038	534.231	-0.215639	0.0989519	-2.17923	0.0293143	0.218492	DVL2	19.0058	20.7751	19.4735	19.646	192.59	0.130531	0.161503	0.808228	0.418959	0.614811
ENST00000005386	RPAP3	17.2704	16.5163	17.9341	17.3764	808.354	0.0876734	0.0799895	1.09606	0.273052	0.742104	RPAP3	45.2096	44.2989	42.2179	42.9786	382.812	0.0750835	0.114561	0.655402	0.512209	0.692874
ENST00000006275	TRAPPC6A	14.5165	15.734	11.7408	12.6532	118.474	-0.286378	0.209769	-1.36521	0.172188	0.615312	TRAPPC6A	73.214	77.4377	78.9483	72.339	172.741	0.129951	0.170055	0.76417	0.444766	0.638125
ENST00000006658	SPATA20	33.0722	32.047	32.2141	32.4514	921.507	0.0139487	0.0744064	0.187466	0.851295	0.977985	SPATA20	18.6566	17.054	13.3507	12.4413	164.014	-0.319806	0.174873	-1.82879	0.0674305	0.165491
ENST00000006777	RHBDD2	28.2526	29.3909	28.1911	27.7013	526.656	-0.020463	0.0989042	-0.206897	0.83609	0.97552	RHBDD2	60.7988	70.718	26.6361	30.4317	224.717	-1.0227	0.15829	-6.46093	1.04e-10	1.23e-09
ENST00000007390	TSR3	30.9991	30.6601	21.8709	20.481	338.738	-0.517857	0.125007	-4.14263	3.43e-05	0.000843181	TSR3	27.882	30.5738	31.6159	29.5412	124.601	0.159822	0.199691	0.800345	0.423511	0.618079
ENST00000007414	OSBPL7	3.39008	3.34533	3.09542	2.72266	123.915	-0.187195	0.205029	-0.913018	0.361233	0.809669	OSBPL7	3.47141	2.83225	2.70349	2.41022	31.5245	-0.140881	0.402612	-0.349918	0.7264	0.849922
ENST00000007722	ITGA3	121.474	119.262	112.035	114.75	4617.85	-0.0620897	0.033145	-1.87328	0.0610304	0.35473	ITGA3	98.1883	95.6034	33.4547	35.9334	904.388	-1.34914	0.0831395	-16.2274	3.23e-59	2.2e-57
ENST00000008527	CRY1	14.1989	13.8973	12.3402	13.2887	432.433	-0.108564	0.109963	-0.987275	0.323508	0.784308	CRY1	15.9139	17.116	11.9414	12.4096	109.464	-0.286435	0.215782	-1.32743	0.184367	0.353143
ENST00000009041	STARD3NL	25.4898	27.7113	27.8946	29.2298	514.064	0.126703	0.101642	1.24656	0.212558	0.671556	STARD3NL	70.4858	66.8427	46.1177	49.1451	176.788	-0.383664	0.169195	-2.26758	0.0233546	0.0707778
ENST00000010299	FAM76A	4.04702	3.65773	4.40062	5.10041	48.7436	0.326373	0.321184	1.01616	0.309554	0.772972	FAM76A	9.79616	10.9015	5.68653	7.43916	38.2797	-0.453905	0.369953	-1.22693	0.21985	0.400312
ENST00000011473	SYPL1	44.2595	43.9118	43.2008	42.7538	998.288	-0.0126984	0.0711639	-0.178439	0.858378	0.979578	SYPL1	288.316	299.516	126.626	126.021	711.32	-1.06956	0.0899841	-11.8861	1.4e-32	4.68e-31
ENST00000011619	RANBP9	6.27863	6.7613	6.05139	5.9269	228.14	-0.0984678	0.151022	-0.65201	0.514395	0.892487	RANBP9	15.7516	13.951	12.9528	13.3391	134.251	-0.0221248	0.19527	-0.113304	0.909789	0.95585
ENST00000012049	QPCTL	5.49919	6.38339	6.02909	7.01704	142.855	0.15884	0.19432	0.817416	0.41369	0.84683	QPCTL	13.6637	14.689	4.41408	5.97664	47.5702	-1.28455	0.345294	-3.72016	0.000199096	0.00109383
ENST00000012443	PPP5C	44.6607	44.2385	44.3331	43.6922	1020.12	0.00978342	0.0704032	0.138963	0.88948	0.983101	PPP5C	92.187	92.7702	85.8295	84.5584	587.556	0.0206034	0.0942392	0.218629	0.826939	0.909709
ENST00000013070	UBR7	18.009	19.3881	19.1455	19.1444	712.944	0.0580869	0.0858828	0.676351	0.498818	0.885007	UBR7	38.4811	33.6672	33.3268	31.2369	190.709	-0.00603	0.164766	-0.0365974	0.970806	0.985603
ENST00000013125	MAP4K5	14.4519	14.6764	13.7962	12.8789	654.725	-0.102897	0.0893335	-1.15183	0.249391	0.717669	MAP4K5	16.8637	18.0739	17.0412	17.2915	191.861	0.133221	0.160329	0.830926	0.406016	0.602714
ENST00000013807	ERCC1	64.5821	57.9295	62.368	59.0776	840.432	0.011411	0.0820354	0.139099	0.889372	0.98307	ERCC1	107.299	108.141	111.455	114.141	469.468	0.184726	0.104526	1.76728	0.0771806	0.183883
ENST00000014914	GPRC5A	24.3425	24.2193	28.4861	28.2562	2091.19	0.24864	0.0488112	5.09392	3.51e-07	1.31e-05	GPRC5A	623.028	625.758	268.986	248.464	2034.78	-1.13379	0.0548701	-20.6633	7.42e-95	9.38e-93
ENST00000014930	HEBP1	6.2047	5.92241	5.61771	4.62074	69.8277	-0.22022	0.271604	-0.810814	0.417473	0.847596	HEBP1	120.776	134.342	127.133	145.405	332.344	0.23007	0.126925	1.81264	0.0698874	0.170306
ENST00000016171	COX15	27.5402	27.7471	29.3293	31.6006	738.403	0.164247	0.0842405	1.94974	0.0512069	0.320892	COX15	85.2097	76.6407	74.233	69.9154	412.38	-0.0446109	0.113446	-0.393234	0.694147	0.829615
ENST00000017003	XYLT2	14.7033	13.9337	11.9478	11.4081	491.117	-0.270068	0.103556	-2.60795	0.00910869	0.0937427	XYLT2	9.97642	9.40604	3.02148	3.42144	71.4351	-1.46112	0.285011	-5.12656	2.95e-07	2.53e-06
ENST00000020926	SYT13	7.00898	6.83464	7.25853	7.17677	393.805	0.0844131	0.114087	0.7399	0.459361	0.867914	SYT13	16.0098	18.1112	10.885	9.32921	75.5992	-0.651044	0.265232	-2.45462	0.0141035	0.0464456
ENST00000023939	RTF2	55.8216	55.3509	56.9307	56.4458	1056.36	0.0523586	0.0690924	0.757805	0.448568	0.862302	RTFDC1	113.297	111.681	129.474	134.891	542.442	0.371772	0.0982763	3.78293	0.000154995	0.000867316
ENST00000025008	RB1CC1	21.5257	21.7587	21.3796	22.0904	1551.95	0.0302163	0.057178	0.52846	0.59718	0.924482	RB1CC1	11.5698	12.1887	8.77998	8.48767	212.943	-0.299713	0.152953	-1.95951	0.0500535	0.131743
ENST00000025301	AKAP11	10.7392	10.6563	11.1529	10.1778	1141.96	0.019649	0.0688225	0.285503	0.775259	0.968264	AKAP11	11.2023	10.4048	7.00727	6.3163	215.433	-0.543673	0.155191	-3.50326	0.000459602	0.00234514
ENST00000025399	STRAP	97.2464	97.1288	94.6736	91.2453	1478	-0.0401357	0.0586669	-0.684129	0.493894	0.883275	STRAP	274.156	267.034	267.791	254.607	1283.32	0.0827652	0.0658469	1.25693	0.208778	0.385649
ENST00000026218	PIGQ	12.8062	12.9492	7.93331	8.2649	321.256	-0.645003	0.128644	-5.01384	5.34e-07	1.89e-05	PIGQ	11.2632	10.4287	6.98877	6.89819	87.8777	-0.504481	0.241419	-2.08964	0.0366497	0.102297
ENST00000029410	B4GALT7	11.9354	11.9348	10.0809	11.0698	205.971	-0.150459	0.159131	-0.945503	0.344402	0.800145	B4GALT7	16.8131	16.9451	10.5708	7.24048	55.757	-0.850308	0.313798	-2.70973	0.00673374	0.0250749
ENST00000033079	FAM13B	5.60742	5.84641	5.36124	6.22557	339.451	0.0407077	0.126734	0.321206	0.748054	0.963537	FAM13B	1.44511	2.22301	2.0271	1.66344	21.6354	0.191742	0.487363	0.393427	0.694004	0.829524
ENST00000035307	CHPF2	10.9287	11.1747	9.16043	10.5853	448.56	-0.138677	0.110784	-1.25178	0.210651	0.668787	CHPF2	6.67088	5.99642	6.55251	6.5719	65.456	0.140072	0.276098	0.507326	0.611926	0.771305
ENST00000037243	GABARAPL2	41.6984	44.2134	43.2351	37.5184	437.481	-0.0652949	0.11255	-0.580143	0.561818	0.910012	GABARAPL2	408.044	412.447	417.942	420.624	638.025	0.171724	0.0905789	1.89585	0.0579804	0.147016
ENST00000039989	TTC17	20.3569	20.0828	20.287	19.7242	973.275	0.0086649	0.0722965	0.119852	0.9046	0.984803	TTC17	15.0044	13.8313	5.54178	5.26174	145.681	-1.28501	0.196852	-6.52779	6.67e-11	7.96e-10
ENST00000040584	HOXC8	1.45383	1.31853	1.5207	1.34682	36.7519	0.0727041	0.368222	0.197446	0.843478	0.976002	HOXC8	6.61426	5.50685	5.22576	3.84356	16.8023	-0.212224	0.552064	-0.38442	0.700667	0.835164
ENST00000040663	MRI1	6.37704	6.40248	6.708	6.70759	224.457	0.0941155	0.151032	0.623149	0.533186	0.899494	MRI1	14.8994	17.1073	19.6492	17.8741	84.7425	0.356486	0.245047	1.45477	0.145734	0.298453
ENST00000040738	BOD1L1	13.4097	14.0587	13.3169	13.5844	1548.61	-0.00604796	0.0578873	-0.104478	0.91679	0.986019	BOD1L1	5.63409	5.95419	2.79095	3.5198	176.605	-0.753211	0.175968	-4.28038	1.87e-05	0.000124033
ENST00000040877	TARBP1	12.4477	13.1535	13.2328	13.5143	734.779	0.0872138	0.0840325	1.03786	0.299336	0.763861	TARBP1	6.09641	6.27408	5.56512	6.99002	131.879	0.169149	0.199238	0.848982	0.395891	0.593717
ENST00000043402	RTN4R	1.55535	1.30307	0.43216	0.48615	19.7074	-1.61414	0.552123	-2.92352	0.00346097	0.0434933	RTN4R	2.64838	4.74519	3.92135	4.46926	24.3049	0.335055	0.468848	0.714634	0.474835	0.664791
ENST00000044462	PSMA4	69.2313	70.2362	75.5349	73.9473	3411.09	0.124083	0.0383245	3.23769	0.001205	0.0184308	PSMA4	631.675	630.184	731.97	774.633	2400.62	0.391915	0.0489076	8.01337	1.12e-15	1.84e-14
ENST00000053468	MRPS10	26.5391	26.8103	29.4042	29.4524	635.454	0.165768	0.0894628	1.85293	0.0638924	0.364323	MRPS10	90.3677	93.5199	98.1507	85.3998	243.224	0.159231	0.143526	1.10942	0.267248	0.459398
ENST00000053867	GRN	69.5185	65.7174	63.2062	62.3149	1496.76	-0.0835185	0.0592967	-1.40849	0.158987	0.591333	GRN	224.859	225.086	46.9173	49.7654	1044.51	-2.08204	0.082338	-25.2864	4.5e-141	1.07e-138
ENST00000054650	THAP3	5.92251	5.32405	4.76642	4.68925	76.1779	-0.226209	0.258984	-0.873449	0.382418	0.825949	THAP3	11.0651	10.2715	11.641	6.36842	31.3122	-0.122784	0.40839	-0.300654	0.763679	0.872131
ENST00000054666	VAMP3	34.8186	33.3914	34.3782	32.0136	790.19	-0.0149518	0.0818771	-0.182613	0.855102	0.978878	VAMP3	247.753	245.49	236.908	262.977	296.611	0.240528	0.13097	1.83651	0.0662824	0.163613
ENST00000054950	RCN1	73.3626	73.963	65.2056	66.0998	1930.92	-0.142041	0.051021	-2.78398	0.00536964	0.061414	RCN1	26.0713	33.2688	13.7543	10.7295	603.398	-1.56698	0.106535	-14.7086	5.68e-49	3.02e-47
ENST00000055077	RFC2	37.3433	38.5055	41.3204	40.6947	717.289	0.136804	0.0844001	1.62089	0.10504	0.480565	RFC2	74.3118	65.5828	98.8367	91.7244	388.719	0.545546	0.119288	4.57337	4.8e-06	3.51e-05
ENST00000055335	PPP1R3F	1.26914	1.10458	1.20811	0.453013	37.7621	-0.49106	0.651464	-0.753778	0.450983	0.863444	PPP1R3F	1.13231	1.40455	1.47725	0.740812	12.4968	-0.0902608	0.653721	-0.138072	0.890183	0.945028
ENST00000056233	NFE2L3	6.13983	5.96477	5.81232	6.45774	245.758	0.043629	0.146024	0.298779	0.765108	0.96685	NFE2L3	9.0251	8.08529	8.98971	9.62553	81.4169	0.222008	0.248681	0.892742	0.371996	0.56918
ENST00000064778	FAM168A	9.87883	10.1696	10.5072	10.1036	799.768	0.0639553	0.0801967	0.79748	0.425172	0.851567	FAM168A	48.2021	46.8558	25.5691	24.9517	115.983	-0.81133	0.212522	-3.81763	0.000134742	0.000763641
ENST00000064780	RELT	3.53106	3.96326	3.85857	3.64227	137.516	0.0253051	0.194797	0.129905	0.896642	0.983978	RELT	3.39875	3.0992	3.92135	3.7363	19.5481	0.351219	0.505991	0.694121	0.487606	0.675797
ENST00000070846	PKP2	2.89031	2.90945	2.37714	2.7484	124.839	-0.154244	0.204604	-0.753868	0.450928	0.863444	PKP2	6.55649	6.60796	12.8234	11.6136	109.826	1.01847	0.217255	4.6879	2.76e-06	2.07e-05
ENST00000072644	YIPF1	9.02003	7.89778	9.34235	10.3221	179.692	0.241074	0.172404	1.39831	0.16202	0.596412	YIPF1	23.1978	24.9845	15.9801	16.5801	80.5743	-0.409572	0.251583	-1.62798	0.10353	0.231064
ENST00000072869	ADCK2	10.1275	10.7303	9.8732	9.58702	279.673	-0.0760161	0.136172	-0.558235	0.576684	0.916542	ADCK2	6.67031	8.96356	7.13798	7.42925	62.6646	0.0361431	0.287619	0.125663	0.899998	0.950291
ENST00000074304	INPP4A	3.7761	3.90906	3.79497	4.43238	289.712	0.122404	0.136763	0.895013	0.37078	0.817987	INPP4A	9.6163	8.18418	8.02531	5.71224	99.1625	-0.201376	0.235478	-0.855182	0.39245	0.591061
ENST00000075120	SLC2A3	17.7445	18.5124	17.6717	18.5761	747.989	0.0236834	0.0834689	0.283739	0.77661	0.968264	SLC2A3	11.9263	11.1715	5.26931	4.77346	52.7366	-1.03422	0.320298	-3.22892	0.00124258	0.00569529
ENST00000078429	GNA11	11.9165	11.1164	8.59669	7.69394	443.525	-0.475632	0.111606	-4.26172	2.03e-05	0.000524293	GNA11	36.2507	43.3734	28.8858	25.2026	158.85	-0.426633	0.181543	-2.35004	0.0187713	0.0591299
ENST00000081029	MRPS35	71.2191	75.4603	76.2492	72.4553	1456.44	0.0438245	0.0607858	0.720966	0.470931	0.871085	MRPS35	207.919	199.345	241.964	235.612	943.742	0.369893	0.0761134	4.85976	1.18e-06	9.23e-06
ENST00000083182	APPBP2	10.2841	10.7242	9.93209	9.86679	713.965	-0.0614936	0.084926	-0.724084	0.469014	0.870289	APPBP2	24.5064	27.0968	21.0412	21.3926	181.03	-0.155191	0.167032	-0.929106	0.352834	0.551092
ENST00000084798	CA11	8.1004	7.33769	7.59292	6.49032	136.429	-0.1085	0.197536	-0.54927	0.58282	0.918423	CA11	7.00179	5.13219	4.11263	1.8046	19.3694	-0.848057	0.537221	-1.5786	0.114428	0.249249
ENST00000085068	ISOC2	50.7647	50.9081	37.7193	39.8695	541.584	-0.365971	0.0982968	-3.72312	0.000196774	0.00397678	ISOC2	71.483	74.2658	59.5122	77.2887	203.145	0.0479448	0.1632	0.29378	0.768926	0.875814
ENST00000085219	CD22	0.549118	0.4243	0.41698	0.577322	17.3686	0.054653	0.545296	0.100226	0.920165	0.986063	CD22	0.410824	0.662478	0.298615	0.199666	4.23571	-0.954563	1.19175	-0.800973	0.423147	0.618079
ENST00000156084	OTUD5	19.6543	18.1622	19.1633	18.204	555.298	0.00678673	0.097956	0.0692834	0.944764	0.991238	OTUD5	36.8078	34.8857	30.8591	33.0237	254.816	-0.0182934	0.139928	-0.130734	0.895985	0.948826
ENST00000156109	GPKOW	17.8914	17.7427	19.1282	18.4303	327.203	0.0999147	0.125245	0.797756	0.425012	0.851567	GPKOW	36.1126	38.9011	40.9146	44.7662	249.856	0.346856	0.14197	2.44316	0.0145591	0.0476924
ENST00000156471	AQR	23.0928	23.3046	23.9531	24.0063	2441.4	0.0718097	0.0451295	1.59119	0.111566	0.497337	AQR	27.5562	28.67	26.5701	28.3	543.942	0.0824683	0.0989153	0.833726	0.404435	0.601221
ENST00000157600	LMCD1	3.93599	3.75827	4.18336	4.53803	366.774	0.204813	0.119625	1.71212	0.0868744	0.434814	LMCD1	50.9082	53.8059	51.2783	51.8934	252.503	0.126621	0.139738	0.906134	0.364865	0.562508
ENST00000157812	PSMC4	184.17	180.342	199.433	194.691	3588.19	0.136716	0.0375877	3.63725	0.00027556	0.00532461	PSMC4	444.2	451.714	449.177	468.915	2499.41	0.184391	0.0473354	3.89541	9.8e-05	0.000570474
ENST00000158771	DERL2	17.0419	16.6489	16.4314	17.1864	756.072	0.0209085	0.0825735	0.25321	0.800106	0.968264	DERL2	175.003	164.051	84.3089	84.9122	392.25	-0.916787	0.118089	-7.76355	8.26e-15	1.29e-13
ENST00000159087	ANO8	1.42783	1.19306	1.10595	0.75401	50.395	-0.470798	0.327425	-1.43788	0.150468	0.576212	ANO8	1.12977	1.19557	0.547461	0.549081	13.8519	-1.00143	0.62885	-1.59249	0.111276	0.244042
ENST00000160262	ICAM3	2.49631	1.97812	1.69477	2.23937	39.3072	-0.161628	0.363374	-0.444799	0.656465	0.943439	ICAM3	4.19851	3.33389	3.39085	3.71006	26.58	-0.0052946	0.433553	-0.0122121	0.990256	0.99653
ENST00000160827	KIF22	51.3208	52.7107	49.5006	49.2491	1154.79	-0.0511296	0.0662935	-0.771262	0.440552	0.857905	KIF22	61.1167	60.7528	73.0255	70.9528	582.67	0.366738	0.0947171	3.87193	0.000107976	0.00062364
ENST00000161559	CEACAM1	0.374534	0.257481	0.631714	0.631675	17.8869	1.02327	0.54425	1.88014	0.0600892	0.351444	CEACAM1	3.30768	3.2003	1.44255	0.964545	15.4243	-1.10233	0.600304	-1.83629	0.0663151	0.163661
ENST00000161863	YTHDC2	11.0686	10.7701	10.3932	11.2753	739.445	0.0127533	0.0846535	0.150652	0.88025	0.981012	YTHDC2	9.87936	10.006	8.37194	6.44536	162.519	-0.234274	0.180196	-1.30011	0.193565	0.365059
ENST00000162044	TMEM161A	11.1451	11.4713	8.53742	7.27736	232.856	-0.492068	0.152962	-3.21692	0.00129574	0.019528	TMEM161A	18.0159	19.768	9.68057	12.3572	93.2676	-0.647453	0.239284	-2.70579	0.00681421	0.0253137
ENST00000162391	FOXJ2	3.40248	3.12127	3.26983	3.02251	190.817	-0.0280823	0.165813	-0.169361	0.865512	0.979578	FOXJ2	6.91086	5.74316	6.90334	7.51303	49.8692	0.252095	0.318344	0.791893	0.428423	0.622097
ENST00000162749	TNFRSF1A	124.253	121.011	122.042	122.276	2865.17	0.01846	0.0419757	0.439777	0.660098	0.944753	TNFRSF1A	209.698	206.566	77.2677	79.7265	844.104	-1.24857	0.0841502	-14.8374	8.39e-50	4.58e-48
ENST00000163416	GOLGA5	23.6442	20.9468	22.4328	21.7385	688.855	0.0103773	0.0902477	0.114987	0.908455	0.985351	GOLGA5	30.1794	30.5123	20.1834	24.7544	252.825	-0.272695	0.14444	-1.88794	0.0590335	0.149137
ENST00000164024	CELSR3	2.85567	2.74598	2.3057	2.32316	328.833	-0.251162	0.125625	-1.9993	0.0455755	0.296337	CELSR3	0.462276	0.360018	0.101822	0.153186	11.7596	-1.43678	0.711571	-2.01917	0.0434697	0.117818
ENST00000164133	PPP2R5B	2.4854	2.27569	2.46279	2.46264	71.2699	0.0729858	0.265889	0.274497	0.783702	0.968264	PPP2R5B	1.82035	2.54028	3.56235	3.91317	20.1436	0.948459	0.508669	1.86459	0.0622388	0.155231
ENST00000164227	BCL3	11.9726	12.0592	11.861	9.56657	229.905	-0.141452	0.155448	-0.909963	0.362842	0.810641	BCL3	23.4533	20.5476	21.7272	25.7028	139.26	0.198321	0.195164	1.01618	0.309544	0.508951
ENST00000166139	FSTL3	44.5026	43.9452	40.1836	39.2575	1131.39	-0.130904	0.0670181	-1.95327	0.0507876	0.319607	FSTL3	51.8644	49.8713	15.3872	16.3973	114.529	-1.5712	0.226938	-6.92349	4.41e-12	5.79e-11
ENST00000166345	TRIP13	35.1616	34.6558	39.9152	38.9192	974.643	0.199273	0.0721607	2.76152	0.00575331	0.064936	TRIP13	75.7152	74.686	71.2332	61.8529	400.762	-0.0246733	0.115265	-0.214057	0.830503	0.91195
ENST00000168216	HSD17B10	81.2904	78.6316	83.5496	82.8841	839.429	0.0816123	0.0779978	1.04634	0.295403	0.761603	HSD17B10	214.647	216.063	251.635	246.872	798.73	0.337234	0.0819326	4.11599	3.86e-05	0.0002411
ENST00000169298	ST6GAL1	1.13597	1.66838	1.59666	1.32287	71.0486	0.0821471	0.280951	0.292389	0.769989	0.967067	ST6GAL1	2.22836	2.76413	0.415315	1.24963	8.54025	-1.43267	0.85384	-1.67791	0.093365	0.213177
ENST00000169551	TIMM21	11.341	9.88319	10.7943	10.7937	355.949	0.0485417	0.123676	0.39249	0.694697	0.956201	TIMM21	39.5673	35.9184	29.5761	25.2311	106.271	-0.334667	0.219352	-1.52571	0.127083	0.270149
ENST00000170168	REXO1	3.47513	3.43952	2.00506	1.84545	133.434	-0.820575	0.2013	-4.07638	4.57e-05	0.0010803	REXO1	2.1089	2.24034	2.83101	2.90864	40.2608	0.552131	0.352164	1.56782	0.116922	0.253332
ENST00000170447	MKRN2	13.8995	14.0756	14.9102	14.9093	432.451	0.116151	0.108703	1.06852	0.285287	0.752936	MKRN2	30.6145	32.035	31.8185	27.4408	168.628	0.0553086	0.173114	0.319493	0.749353	0.864333
ENST00000170564	GPATCH1	7.34982	7.65679	8.39198	6.8119	259.881	0.0428694	0.146829	0.291968	0.770311	0.967193	GPATCH1	7.32564	7.15713	5.07121	5.44952	75.9057	-0.36595	0.258917	-1.41339	0.157541	0.316253
ENST00000173527	ISOC1	9.80456	10.1828	10.5988	9.7871	211.372	0.0525198	0.156691	0.33518	0.737489	0.961608	ISOC1	36.6651	40.7188	41.5886	31.4966	149.295	0.0791621	0.188261	0.420492	0.674126	0.815724
ENST00000174618	MNT	3.61719	3.88251	3.28372	3.68862	192.077	-0.0811356	0.165864	-0.489168	0.624723	0.933956	MNT	12.6751	11.2079	7.96734	7.99092	75.6082	-0.378425	0.260571	-1.45229	0.146421	0.29939
ENST00000175091	LAPTM4A	44.1221	47.5923	47.1605	45.696	679.183	0.0418999	0.0882724	0.474665	0.635026	0.935316	LAPTM4A	609.317	590.62	247.499	237.707	1272.49	-1.17574	0.069119	-17.0104	6.87e-65	5.13e-63
ENST00000175756	PTPN18	3.97746	4.36146	4.53051	3.86232	163.097	0.0333356	0.18117	0.184001	0.854012	0.978827	PTPN18	6.95935	8.38629	5.68169	4.77939	39.4245	-0.483974	0.363593	-1.33109	0.18316	0.351537
ENST00000176763	STK10	6.03321	6.01907	5.61434	5.75658	371.942	-0.0599179	0.117502	-0.509932	0.610099	0.929143	STK10	8.12404	8.62257	9.40637	8.91008	111.965	0.25125	0.210933	1.19113	0.233601	0.417135
ENST00000177742	MRPS34	98.3768	93.8153	68.2597	62.1973	903.114	-0.534949	0.0784581	-6.81827	9.21e-12	5.98e-10	MRPS34	107.019	105.366	101.92	86.8133	443.201	-0.0732723	0.108985	-0.672313	0.501384	0.686218
ENST00000178638	CA12	76.5326	75.8324	71.7952	72.0319	4867.75	-0.0591586	0.0317722	-1.86196	0.0626087	0.359664	CA12	619.461	607.681	85.4997	85.0361	1576.46	-2.69111	0.07321	-36.7588	8.41e-296	6.13e-293
ENST00000178640	MAP2K5	3.80006	4.14851	3.53933	2.91193	90.9083	-0.27708	0.240634	-1.15146	0.249545	0.717926	MAP2K5	16.6217	14.2472	14.867	15.8547	90.7374	0.0856872	0.236236	0.362719	0.716815	0.84457
ENST00000179259	TIGAR	4.69865	4.36	3.92735	4.37482	384.041	-0.101773	0.11873	-0.857183	0.391344	0.834725	TIGAR	72.4288	68.3215	78.6883	74.2235	262.573	0.271367	0.138377	1.96107	0.0498714	0.131375
ENST00000181796	FAM107B	53.7595	54.1241	50.4682	50.7703	2133.15	-0.0676787	0.0483929	-1.39853	0.161955	0.596351	FAM107B	146.465	149.448	82.1048	78.7554	455.303	-0.748981	0.108395	-6.90972	4.86e-12	6.33e-11
ENST00000181839	CDK13	8.13327	7.54954	7.0892	7.32028	772.398	-0.0981353	0.0830908	-1.18106	0.237579	0.704328	CDK13	6.67398	6.2161	7.30454	7.82948	138.853	0.352403	0.191037	1.84468	0.0650835	0.161365
ENST00000182527	TRAM2	11.4687	10.6565	12.3091	11.4441	871.792	0.126458	0.0792004	1.59668	0.110337	0.494489	TRAM2	36.8658	33.1743	10.4817	12.1124	105.841	-1.622	0.238699	-6.79516	1.08e-11	1.39e-10
ENST00000184266	NDUFB4	147.746	143.974	140.826	154.206	1029.75	0.0403266	0.0725119	0.556137	0.578117	0.916542	NDUFB4	848.07	846.029	843.743	903.267	1475.11	0.196051	0.0619593	3.16419	0.00155514	0.00696302
ENST00000184956	HEATR6	12.0143	12.268	12.0867	11.1576	782.394	-0.0389939	0.0821849	-0.474465	0.635168	0.935414	HEATR6	14.0248	13.4222	11.8504	11.7422	201.122	-0.121916	0.156661	-0.778215	0.436442	0.630123
ENST00000185150	ERLEC1	29.7675	28.3297	24.9872	27.8191	730.977	-0.113721	0.0868491	-1.30941	0.190396	0.645012	ERLEC1	57.4903	57.0704	13.266	12.9551	218.88	-1.96231	0.170393	-11.5164	1.09e-30	3.41e-29
ENST00000186436	TMEM131	6.56091	6.21918	6.25294	6.08018	453.576	-0.027331	0.107006	-0.255416	0.798401	0.968264	TMEM131	10.8659	10.9512	3.49235	4.311	179.849	-1.34662	0.178235	-7.55528	4.18e-14	6.22e-13
ENST00000187762	TMEM38A	0.621199	0.559055	0.878118	0.439032	17.7203	0.182301	0.550813	0.330967	0.74067	0.961733	TMEM38A	0.465509	1.64207	1.12788	0.848412	3.95482	0.060369	1.22576	0.0492501	0.96072	0.981476
ENST00000188312	ACTR6	13.7967	12.6353	14.0219	12.7851	353.646	0.0443444	0.123228	0.359856	0.718955	0.960728	ACTR6	49.3833	43.2175	49.8189	43.9875	246.422	0.160041	0.14661	1.09161	0.275005	0.468256
ENST00000192788	UHRF1BP1	5.51796	5.83375	6.0043	5.83929	598.303	0.0852414	0.0931688	0.914914	0.360237	0.808752	UHRF1BP1	5.7028	5.40662	4.97657	3.75815	94.5048	-0.209791	0.236869	-0.885682	0.375789	0.573285
ENST00000193322	OSTM1	7.67655	8.40728	7.86848	7.84452	383.19	-0.00960332	0.11729	-0.0818769	0.934745	0.989454	OSTM1	54.383	45.3599	8.83477	8.60774	127.337	-2.33608	0.239603	-9.7498	1.85e-22	4.3e-21
ENST00000194155	PCDHB2	1.5988	1.77859	1.00161	1.30972	62.6071	-0.523118	0.291063	-1.79727	0.0722932	0.391186	PCDHB2	2.79072	3.34	0.528251	0.423852	18.7795	-2.46282	0.630151	-3.90829	9.3e-05	0.000542934
ENST00000194530	STRADB	16.2187	16.6961	16.3997	16.1624	392.178	0.00850082	0.114433	0.0742866	0.940782	0.990719	STRADB	11.3214	16.2765	8.67293	10.5192	64.5838	-0.361509	0.291507	-1.24013	0.214926	0.393742
ENST00000194900	DLG3	1.35039	1.33696	1.323	1.44318	89.8641	0.0657486	0.237739	0.276558	0.782119	0.968264	DLG3	2.95096	3.13936	3.07842	2.98793	33.4135	0.103023	0.385485	0.267255	0.789273	0.888129
ENST00000196061	PLOD1	35.0655	34.8992	35.005	34.5794	1119.49	0.0161742	0.0670979	0.241054	0.809514	0.969577	PLOD1	56.9576	53.6421	16.1196	13.6084	329.681	-1.76446	0.137837	-12.8011	1.62e-37	6.32e-36
ENST00000196371	OXCT1	0.595401	0.396916	0.828897	0.796968	23.2958	0.736326	0.472533	1.55825	0.119174	0.516586	OXCT1	3.61351	4.45119	4.86398	4.55315	29.5438	0.326857	0.412591	0.792205	0.428241	0.621979
ENST00000196489	ZNF416	4.33479	4.71989	5.36422	5.24011	134.959	0.251965	0.195389	1.28956	0.197205	0.652383	ZNF416	2.6947	3.6605	3.26449	2.84708	24.5806	0.16155	0.454174	0.3557	0.722065	0.847288
ENST00000197268	FAM234B	2.6193	2.79264	2.47435	2.96458	137.803	0.0312336	0.196467	0.158977	0.873687	0.980217	KIAA1467	4.13981	6.65314	1.76208	2.85487	31.0885	-1.11727	0.438241	-2.54944	0.0107896	0.0372762
ENST00000198767	RRN3	29.5421	28.0638	28.445	28.2479	1159.06	0.000982981	0.0668536	0.0147035	0.988269	0.997979	RRN3	44.2576	46.1135	51.4142	48.8387	413.09	0.293977	0.111474	2.63719	0.00835969	0.0299937
ENST00000198939	CHERP	3.60171	4.30185	2.44281	3.03404	147.084	-0.505081	0.197371	-2.55904	0.0104962	0.103933	CHERP	14.8646	13.3167	12.4599	13.0441	161.928	0.0230397	0.17591	0.130975	0.895795	0.948826
ENST00000199320	DIMT1	15.905	14.2302	14.6153	15.0595	456.416	0.00181647	0.108848	0.0166881	0.986685	0.997979	DIMT1	48.9156	52.2128	50.9086	49.9786	210.4	0.151943	0.153185	0.991888	0.321252	0.520873
ENST00000199389	EIF2AK1	38.7752	39.5701	39.1872	37.3993	1842.07	-0.00871871	0.0530122	-0.164466	0.869364	0.979829	EIF2AK1	98.2042	103.317	69.7222	74.0893	704.952	-0.35167	0.08807	-3.99308	6.52e-05	0.000391869
ENST00000199448	EPDR1	33.1424	33.6283	32.0264	32.8595	892.483	-0.0172676	0.0755393	-0.228591	0.819187	0.972173	EPDR1	106.876	114.917	19.9481	30.5769	195.842	-1.95782	0.187332	-10.4511	1.45e-25	3.79e-24
ENST00000199764	CEACAM6	59.0681	56.9864	64.0453	62.0174	1693.62	0.143371	0.0551964	2.59746	0.00939151	0.0958103	CEACAM6	67.3682	71.975	12.9895	8.60333	179.239	-2.58127	0.210247	-12.2773	1.2e-34	4.22e-33
ENST00000199814	RBM22	26.9789	24.5252	27.7725	29.8719	676.762	0.186525	0.0903116	2.06535	0.0388897	0.266648	RBM22	50.8696	44.4219	63.8339	66.0361	311.918	0.584992	0.129581	4.5145	6.35e-06	4.54e-05
ENST00000200135	ZW10	13.7099	12.7991	12.2816	13.6697	406.259	-0.00663493	0.115277	-0.0575565	0.954102	0.993183	ZW10	15.634	17.2874	18.5068	16.7163	176.362	0.257391	0.168041	1.53171	0.125594	0.267995
ENST00000200181	ITGB4	23.5343	23.658	19.717	19.5733	1373.49	-0.24034	0.0606822	-3.96064	7.47e-05	0.00166038	ITGB4	30.9772	31.7978	28.3652	29.9342	723.423	0.00861975	0.0862998	0.0998815	0.920438	0.961281
ENST00000200453	PPP1R15A	28.6537	28.6177	47.145	49.287	975.762	0.775737	0.0731608	10.6032	2.88e-26	4.18e-24	PPP1R15A	6.91805	7.07643	17.7624	18.4423	113.203	1.53808	0.219417	7.00984	2.39e-12	3.18e-11
ENST00000200457	TRIP6	23.0241	21.9612	17.3061	20.1582	376.002	-0.239901	0.121283	-1.97803	0.0479253	0.30724	TRIP6	30.5568	28.4391	33.1214	34.6405	195.773	0.329216	0.158716	2.07425	0.0380562	0.1055
ENST00000200557	ADAM11	0.814708	0.885513	0.705562	0.978623	42.0936	0.0103979	0.349381	0.0297609	0.976258	0.996614	ADAM11	0.633491	0.729674	0.109635	0	3.29477	-3.38256	1.84698	-1.83141	0.0670401	0.164748
ENST00000200652	SLC22A4	4.68218	4.79171	5.68792	5.64056	125.369	0.281965	0.201764	1.39749	0.162265	0.596956	SLC22A4	1.64195	2.41862	0.918065	1.07424	11.1315	-0.812501	0.706255	-1.15044	0.249965	0.438393
ENST00000201031	TFAP2C	7.30957	7.08084	6.93495	6.641	215.711	-0.0600239	0.154669	-0.38808	0.697957	0.956291	TFAP2C	24.5897	20.7302	24.7306	25.5554	140.344	0.317304	0.191111	1.66031	0.0968527	0.219121
ENST00000201586	SULT2B1	3.09206	2.01922	2.02731	2.35154	33.1093	-0.199137	0.400305	-0.497463	0.618862	0.931901	SULT2B1	20.4014	22.0989	18.7097	21.3134	97.5831	0.0652753	0.22788	0.286446	0.774537	0.879697
ENST00000201647	EPS8L1	0.922477	0.890628	0.817555	0.408752	21.0145	-0.540152	0.509312	-1.06055	0.288893	0.756682	EPS8L1	0.28877	1.74622	1.51593	1.75432	12.8113	0.771159	0.693934	1.11129	0.266445	0.458662
ENST00000202017	PDRG1	9.01954	7.68298	7.99551	7.29747	168.731	-0.103185	0.179091	-0.576157	0.564509	0.911137	PDRG1	80.0587	72.7767	53.2477	64.2135	116.709	-0.247811	0.211085	-1.17399	0.2404	0.425413
ENST00000202556	PPP1R13B	1.5898	1.78288	1.85208	1.85197	104.962	0.159261	0.221219	0.719926	0.471571	0.871085	PPP1R13B	2.10696	1.60871	2.01104	2.6376	29.8992	0.401421	0.413898	0.969855	0.332119	0.530576
ENST00000202677	RALGAPA2	5.11117	4.82843	5.30301	4.99464	520.791	0.0750827	0.100455	0.747425	0.454807	0.865766	RALGAPA2	3.93856	3.37031	2.52072	3.20536	79.506	-0.248228	0.25951	-0.956525	0.338807	0.53738
ENST00000202816	ESF1	24.0125	23.1221	20.7026	20.9299	769.159	-0.155046	0.0818777	-1.89363	0.0582747	0.345888	ESF1	18.3184	19.204	18.0308	17.488	204.415	0.0779266	0.155094	0.502449	0.615352	0.773734
ENST00000203001	TRMT6	21.3434	20.5613	19.6477	19.7182	641.523	-0.0661308	0.0895472	-0.738502	0.460209	0.867914	TRMT6	48.4494	40.0799	50.7211	58.1871	326.533	0.441029	0.130867	3.37005	0.000751549	0.00364135
ENST00000203166	HAUS5	8.50449	8.57971	7.3831	6.8241	364.458	-0.242007	0.119917	-2.01812	0.043579	0.287706	HAUS5	10.5545	10.5265	9.98921	8.28218	83.5421	-0.0372922	0.24773	-0.150535	0.880342	0.940318
ENST00000203407	UQCRC1	111.435	115.989	119.368	117.649	1997.27	0.0836483	0.0507198	1.64922	0.0991019	0.466665	UQCRC1	194.282	182.364	167.915	177.397	1146.66	0.0158302	0.0718897	0.220201	0.825715	0.908959
ENST00000203556	GMIP	1.50559	1.22758	1.10135	0.625051	42.3327	-0.638836	0.36503	-1.75009	0.0801025	0.415616	GMIP	2.51111	1.73542	3.91124	3.66129	37.965	0.961603	0.374288	2.56916	0.0101947	0.0355579
ENST00000203630	MLF2.00	81.7602	79.4741	76.2145	72.9033	1646.76	-0.0886752	0.0561743	-1.57857	0.114435	0.503659	MLF2	383.326	395.103	360.013	367.215	1226.98	0.0456358	0.0671062	0.680053	0.496471	0.682423
ENST00000203664	OTUB2	3.94908	3.69818	4.26934	3.38304	161.302	0.0249788	0.184815	0.135156	0.892489	0.983379	OTUB2	3.5689	4.79589	2.16177	3.61361	11.1365	-0.345745	0.691494	-0.499997	0.617077	0.775116
ENST00000204517	TFAP4	8.95393	8.34907	5.77752	5.34024	165.416	-0.614133	0.180104	-3.40987	0.000649939	0.0110517	TFAP4	23.6783	23.8642	14.7166	19.2633	88.1236	-0.337081	0.244131	-1.38074	0.167359	0.329217
ENST00000204549	PDCD7	9.06056	9.61014	8.22115	9.22498	274.77	-0.0738164	0.139138	-0.530528	0.595746	0.923742	PDCD7	8.60951	7.23092	7.64865	7.84563	49.642	0.0646059	0.318243	0.203008	0.839129	0.917837
ENST00000204566	SPG21	62.3225	64.182	62.1684	60.3551	1207.51	-0.0220912	0.0650859	-0.339416	0.734296	0.961608	SPG21	145.062	153.716	123.452	108.993	536.374	-0.230266	0.102393	-2.24885	0.0245221	0.0736674
ENST00000204679	GNPTG	8.4822	7.98533	7.60361	6.80561	164.297	-0.168608	0.178833	-0.942826	0.34577	0.800145	GNPTG	23.9584	27.596	6.63415	6.65378	63.4747	-1.72927	0.311951	-5.5434	2.97e-08	2.82e-07
ENST00000204726	GOLGA3	12.2917	12.9595	11.2333	11.6565	1221.18	-0.117602	0.065675	-1.79067	0.0733466	0.394013	GOLGA3	9.89548	9.8327	7.31653	6.66081	164.876	-0.333448	0.174801	-1.90759	0.056444	0.143993
ENST00000204961	EFNB1	2.22667	3.21616	2.13018	2.51156	89.7304	-0.20559	0.254262	-0.808578	0.418758	0.848106	EFNB1	5.43071	7.29779	8.04103	11.4863	37.5531	0.720245	0.384337	1.874	0.0609309	0.152681
ENST00000205061	GLG1	24.3742	25.3524	26.187	24.7617	2242.17	0.059069	0.0490924	1.20322	0.228891	0.693479	GLG1	56.8087	56.2052	20.6743	18.697	587.889	-1.38669	0.101152	-13.7089	8.98e-43	4.03e-41
ENST00000205143	DLL3	3.81961	4.48522	3.46747	2.92691	92.3029	-0.353098	0.240634	-1.46737	0.142277	0.559599	DLL3	6.86927	6.6962	3.81982	4.10478	43.6475	-0.646358	0.344102	-1.87839	0.0603281	0.151542
ENST00000205194	NAT14	15.1936	16.1009	13.8464	13.7678	214.268	-0.156456	0.155556	-1.00579	0.314517	0.778588	NAT14	20.27	21.1101	10.2317	11.0829	41.6301	-0.82874	0.355115	-2.33372	0.0196104	0.0613362
ENST00000205214	AASDH	4.26736	4.60946	4.45749	4.04668	167.752	-0.0378295	0.176705	-0.214083	0.830483	0.974787	AASDH	2.34514	3.1301	2.9178	3.23447	42.0556	0.321704	0.348653	0.922706	0.35616	0.554679
ENST00000205402	DLD	45.2376	44.9352	47.2374	44.6516	1736.04	0.0512336	0.0547672	0.935479	0.349541	0.801893	DLD	119.499	122.228	118.927	125.924	813.706	0.131439	0.0818346	1.60616	0.108239	0.239075
ENST00000205636	CMTM6	34.867	33.3335	34.3593	34.0714	1218.04	0.028894	0.0649893	0.444596	0.656611	0.943439	CMTM6	175.695	156.761	56.6667	58.2205	263.587	-1.34654	0.147805	-9.11024	8.22e-20	1.69e-18
ENST00000205948	APOH	2.99311	3.20179	3.75692	2.68335	39.9929	0.0800667	0.358122	0.223574	0.823089	0.973113	APOH	21.1806	20.9403	4.88747	6.12742	58.9434	-1.82443	0.326163	-5.59362	2.22e-08	2.16e-07
ENST00000206020	SPAG7	46.3479	50.5739	43.6778	45.138	503.01	-0.101954	0.102934	-0.990484	0.321938	0.782193	SPAG7	110.062	93.0049	105.85	101.694	304.562	0.17996	0.132161	1.36168	0.1733	0.338059
ENST00000206423	CCDC80	6.92275	6.9356	6.14206	6.11634	874.661	-0.152946	0.0762391	-2.00614	0.0448416	0.293267	CCDC80	5.49423	6.64483	2.48489	1.86919	49.6517	-1.28912	0.341232	-3.77784	0.000158195	0.000883624
ENST00000206474	HAUS4	30.5077	27.6697	28.716	29.098	513.407	0.0149873	0.102069	0.146836	0.883262	0.981632	HAUS4	41.0276	39.8039	60.6188	60.3323	244.244	0.71253	0.143098	4.97931	6.38e-07	5.21e-06
ENST00000206542	OSGEP	11.9518	11.0415	9.4067	10.8941	230.497	-0.155636	0.153224	-1.01575	0.30975	0.772996	OSGEP	30.5381	28.8934	31.7102	36.0951	143.309	0.309448	0.188479	1.64181	0.100629	0.225727
ENST00000209728	CDC6	32.7484	33.2662	35.5265	33.9598	1667.44	0.0979824	0.0555228	1.76472	0.0776103	0.407141	CDC6	55.7991	54.2332	60.8229	62.3618	432.584	0.328262	0.10847	3.02629	0.00247571	0.0104757
ENST00000209873	AAAS	41.4672	42.1407	47.0976	48.3676	876.632	0.215377	0.0761842	2.82705	0.00469786	0.0555276	AAAS	82.5945	78.4899	81.6839	82.7	587.138	0.18158	0.0945309	1.92086	0.0547499	0.140492
ENST00000209875	CBX5	45.8279	45.1323	45.2403	43.2548	5584.82	-0.0156043	0.0309426	-0.504299	0.614051	0.929143	CBX5	310.438	333.807	222.028	222.685	680.739	-0.389243	0.0908001	-4.28681	1.81e-05	0.000120733
ENST00000209884	KLHL20	5.84047	5.91202	6.12126	6.27467	222.29	0.100941	0.151865	0.664676	0.506258	0.888799	KLHL20	8.79918	10.1352	6.09129	8.88627	66.8873	-0.247841	0.28607	-0.866364	0.386291	0.58477
ENST00000210187	RAB26	4.1494	3.46582	3.01118	3.32464	62.9084	-0.241332	0.286463	-0.842453	0.399534	0.838919	RAB26	10.3303	12.0553	4.61064	6.27582	28.1423	-0.838013	0.436055	-1.92181	0.0546302	0.140243
ENST00000210313	PSMD5	22.7923	22.6705	21.9907	21.3682	809.374	-0.0443218	0.0793881	-0.558293	0.576644	0.916542	PSMD5	63.7941	61.2332	64.5699	58.2178	410.172	0.12076	0.113221	1.06659	0.286156	0.482142
ENST00000210444	NANS	38.8147	40.8922	39.8148	37.6748	499.545	-0.0166605	0.102347	-0.162784	0.870689	0.980163	NANS	74.246	69.163	96.9905	89.7403	389.802	0.522457	0.116589	4.4812	7.42e-06	5.25e-05
ENST00000210633	SEMA4G	1.17768	0.978027	1.2569	1.10292	49.8533	0.154524	0.31895	0.484477	0.628047	0.933964	SEMA4G	2.97197	3.0785	0.400042	0.501533	17.8448	-2.55462	0.654494	-3.90319	9.49e-05	0.000553206
ENST00000211314	TMEM14A	26.1368	27.0454	28.5921	27.5275	291.173	0.101603	0.132953	0.764206	0.444744	0.859978	TMEM14A	229.87	219.63	158.399	181.929	257.483	-0.268319	0.141984	-1.88978	0.0587874	0.148639
ENST00000211936	ZNF184	3.8738	3.32025	3.82673	4.06353	126.145	0.157291	0.204159	0.770434	0.441043	0.857936	ZNF184	3.24337	2.0547	2.46977	1.80151	23.4033	-0.184559	0.475499	-0.388137	0.697915	0.832832
ENST00000211998	VCL	102.975	102.226	107.234	104.014	6163.91	0.0659376	0.0286761	2.29939	0.0214827	0.175662	VCL	20.4976	21.3389	29.8873	29.2301	376.818	0.635653	0.11607	5.47648	4.34e-08	4.05e-07
ENST00000212015	SIRT1	9.94871	10.5054	9.10283	8.74432	423.799	-0.172654	0.111059	-1.55462	0.120036	0.516807	SIRT1	26.7381	25.3518	17.2681	22.1867	226.836	-0.207583	0.153408	-1.35315	0.176009	0.342265
ENST00000212355	TGFBR3	6.32969	6.4841	6.99105	7.09002	459.76	0.160102	0.105517	1.51731	0.129189	0.53534	TGFBR3	4.90671	6.18154	0.990704	0.993636	35.4165	-2.36185	0.451456	-5.23162	1.68e-07	1.48e-06
ENST00000214869	TMED1	15.1127	13.2606	13.0545	12.8608	238.895	-0.106708	0.149609	-0.713244	0.475695	0.87213	TMED1	45.3738	37.3873	19.3131	16.0177	87.3694	-1.04329	0.257211	-4.05615	4.99e-05	0.000304166
ENST00000215057	MZF1	5.88522	5.88496	4.09661	3.97819	142.399	-0.519603	0.191938	-2.70713	0.00678673	0.0735856	MZF1	1.42221	4.10901	2.29725	3.11046	26.1082	0.175409	0.73334	0.239192	0.810957	0.89986
ENST00000215061	OCEL1	2.79506	3.38335	2.45759	1.41776	30.0518	-0.648877	0.426556	-1.5212	0.12821	0.533293	OCEL1	9.75364	11.9557	8.6225	8.64802	33.909	-0.18616	0.386252	-0.481965	0.629831	0.783982
ENST00000215071	PSMD8	199.114	206.735	219.564	215.223	3520.25	0.123412	0.0383969	3.21412	0.00130847	0.0196569	PSMD8	547.801	549.696	624.85	618.001	2713.97	0.32471	0.0445132	7.29469	2.99e-13	4.25e-12
ENST00000215095	STX1B	0.489543	0.349658	0.539229	0.51673	23.9017	0.35546	0.461847	0.76965	0.441507	0.857961	STX1B	3.14138	4.38374	3.51287	3.52327	13.583	0.0553352	0.615223	0.0899433	0.928332	0.96578
ENST00000215375	ATP5F1D	27.4312	26.6087	14.2483	13.192	217.954	-0.953703	0.15918	-5.99135	2.08e-09	1.08e-07	ATP5D	134.63	124.832	145.031	149.487	309.597	0.308615	0.127435	2.42175	0.0154461	0.0501079
ENST00000215565	NDUFB7	66.2915	65.2194	42.9874	42.396	312.251	-0.59912	0.130091	-4.60538	4.12e-06	0.000124098	NDUFB7	172.714	174.582	129.848	130.85	273.853	-0.260915	0.134706	-1.93692	0.0527551	0.137079
ENST00000215570	TIMM13	30.399	31.92	22.1516	22.3396	478.444	-0.462108	0.104992	-4.40136	1.08e-05	0.000296027	TIMM13	284.967	315.999	251.152	255.455	345.278	-0.0946487	0.123336	-0.767407	0.44284	0.636245
ENST00000215574	CDC34	30.7742	25.3559	22.736	21.7719	384.324	-0.310708	0.124704	-2.49157	0.012718	0.118958	CDC34	66.0549	59.4406	53.2289	54.8197	182.295	-0.0920868	0.167156	-0.550902	0.581701	0.750932
ENST00000215582	MISP	55.9143	53.7875	43.3528	44.4785	1534.82	-0.296747	0.0582865	-5.09118	3.56e-07	1.33e-05	MISP	39.3578	37.7041	40.8507	39.1036	351.006	0.163204	0.119404	1.36682	0.171681	0.335746
ENST00000215659	MAPK12	8.77856	8.68626	7.20575	6.26035	148.09	-0.351092	0.189008	-1.85755	0.0632323	0.361898	MAPK12	11.9466	12.6137	10.1079	13.3635	58.1365	0.092285	0.297506	0.310195	0.756412	0.868346
ENST00000215730	SNAP29	8.07786	8.17343	7.10127	7.66791	356.004	-0.11392	0.121045	-0.941133	0.346637	0.800145	SNAP29	37.2245	36.7011	36.2724	34.4133	124.017	0.147097	0.201093	0.731484	0.464483	0.655632
ENST00000215742	THAP7	9.52602	10.1663	8.06962	7.95935	184.052	-0.272908	0.168321	-1.62135	0.104942	0.480565	THAP7	12.162	10.8955	11.4595	9.03051	44.2423	-0.0274086	0.340511	-0.0804927	0.935845	0.969809
ENST00000215754	MIF	352.403	334.929	153.28	151.951	1485.57	-1.14707	0.0621096	-18.4685	3.7e-76	1.98e-73	MIF	3446.39	3325.24	3168.55	3178.66	5079.26	0.0358144	0.0331926	1.07899	0.280594	0.474707
ENST00000215793	SF3A1	15.3484	16.1985	15.6181	15.5965	861.116	0.00877136	0.0775548	0.113099	0.909952	0.985435	SF3A1	56.8684	54.6614	45.0782	48.7304	535.812	-0.0962393	0.100265	-0.959847	0.337132	0.535834
ENST00000215794	USP18	6.11351	6.33314	5.31292	7.0081	124.047	0.00942512	0.210452	0.044785	0.964279	0.994818	USP18	2.99327	3.95951	4.07946	6.36461	21.2229	0.739265	0.504311	1.46589	0.142678	0.294067
ENST00000215829	SNRPD3	35.1301	36.048	36.025	36.5682	1343.4	0.0524425	0.0613948	0.854185	0.393003	0.835398	SNRPD3	537.417	512.133	584.14	591.909	922.496	0.312446	0.07691	4.06249	4.86e-05	0.000296746
ENST00000215832	MAPK1	12.6782	12.9742	13.7676	13.1189	1561.33	0.0918281	0.057569	1.5951	0.11069	0.495314	MAPK1	106.517	108.912	77.2832	85.9677	447.966	-0.266963	0.108369	-2.46345	0.0137606	0.0455584
ENST00000215838	TCN2	4.80918	4.95808	4.88664	5.50911	119.174	0.114019	0.208233	0.547553	0.583999	0.918777	TCN2	8.96404	8.54163	1.57956	1.58423	29.3133	-2.42039	0.497951	-4.86069	1.17e-06	9.2e-06
ENST00000215882	SLC25A1	36.689	36.2123	31.3417	27.6088	549.723	-0.282412	0.0998142	-2.82938	0.00466389	0.0553383	SLC25A1	96.2226	82.9951	82.6824	85.3741	356.252	0.0434142	0.121325	0.357833	0.720468	0.846777
ENST00000215904	PDXP	5.19881	4.95489	5.27162	3.80995	104.278	-0.136982	0.230307	-0.594778	0.551992	0.905521	PDXP	1.41068	1.1848	1.99379	2.57103	12.7291	1.08393	0.647355	1.6744	0.0940518	0.21435
ENST00000215906	ASPHD2	0.727466	0.630443	0.779042	0.529717	24.2216	-0.029194	0.460793	-0.0633561	0.949483	0.992769	ASPHD2	1.1316	0.950405	0	0.687467	3.22873	-1.44764	1.48222	-0.976673	0.328731	0.527545
ENST00000215909	LGALS1	639.821	651.09	664.299	632.239	3682.84	0.0303117	0.0379734	0.798235	0.424734	0.851541	LGALS1	1666.12	1639.71	1844.18	1818.32	3140.49	0.293906	0.0416687	7.0534	1.75e-12	2.35e-11
ENST00000215917	SRRD	5.30562	6.09814	5.85158	5.66837	248.425	0.0386775	0.146918	0.26326	0.79235	0.968264	SRRD	15.1915	13.8625	16.4141	15.9638	67.4045	0.2754	0.272518	1.01057	0.31222	0.512059
ENST00000215941	ANKRD54	10.8854	11.8246	10.4663	10.7172	246.868	-0.0763387	0.145438	-0.524888	0.599661	0.924655	ANKRD54	12.9908	14.2618	9.83604	11.2745	48.6379	-0.147888	0.322997	-0.457862	0.647052	0.795581
ENST00000215957	MICALL1	4.54571	4.97925	4.14709	4.45896	230.106	-0.122308	0.151518	-0.807216	0.419542	0.848861	MICALL1	7.17709	6.82706	12.5047	12.0518	111.403	0.924245	0.213865	4.32163	1.55e-05	0.000104509
ENST00000215980	CENPM	23.5225	22.1276	23.6228	17.9119	220.364	-0.112289	0.163019	-0.688812	0.490941	0.882907	CENPM	76.5529	78.7126	63.7001	66.7072	169.315	-0.123455	0.171195	-0.721138	0.470825	0.66166
ENST00000216024	DMC1	0.900383	0.432165	0.740519	0.647915	16.6466	0.0832093	0.573272	0.145148	0.884594	0.981758	DMC1	2.04687	1.23776	1.73577	2.23831	7.97381	0.245536	0.821291	0.298964	0.764968	0.873232
ENST00000216027	HSCB	8.64475	8.12718	8.07077	7.6905	96.971	-0.065639	0.229429	-0.286097	0.774804	0.968264	HSCB	20.4339	18.8035	26.5483	24.468	69.5818	0.54062	0.269144	2.00867	0.0445726	0.120103
ENST00000216034	TOMM22	45.4664	46.1886	47.3627	50.462	1037.68	0.118031	0.0708772	1.66528	0.0958563	0.457905	TOMM22	177.905	183.253	217.303	225.092	378.468	0.442326	0.115483	3.83024	0.000128019	0.000728873
ENST00000216038	RTCB	53.5078	55.2053	60.6996	61.476	1257.25	0.192473	0.0635314	3.02958	0.00244894	0.0331765	RTCB	91.643	97.3625	107.014	115.033	691.774	0.371654	0.0889172	4.17978	2.92e-05	0.00018711
ENST00000216039	JOSD1	15.4343	15.7024	16.6965	16.4651	632.468	0.114939	0.0897761	1.28028	0.200446	0.655574	JOSD1	16.1926	19.792	17.1122	17.1628	46.7076	0.0719403	0.32786	0.219424	0.82632	0.909414
ENST00000216044	GTPBP1	4.21505	4.68134	4.53887	4.23888	233.679	0.00467717	0.150485	0.0310805	0.975205	0.996614	GTPBP1	9.05028	9.64555	9.45167	11.3756	88.0573	0.310273	0.242443	1.27978	0.200624	0.373764
ENST00000216061	PPP6R2	5.69519	5.81458	6.85749	6.08834	225.242	0.193662	0.152715	1.26812	0.204754	0.65979	PPP6R2	5.1871	4.2113	5.93479	5.16454	63.6	0.413815	0.283227	1.46107	0.143995	0.295553
ENST00000216068	DNAL4	5.87665	5.32202	3.84722	4.98684	79.5222	-0.318138	0.258702	-1.22975	0.218792	0.678965	DNAL4	11.2675	15.364	9.63531	12.0798	16.7409	-0.301049	0.559573	-0.537997	0.590579	0.756794
ENST00000216085	RHBDD3	7.67981	6.57584	4.43226	4.37289	110.251	-0.671099	0.221907	-3.02424	0.00249256	0.0335672	RHBDD3	4.50735	6.72325	6.55251	6.13377	30.2656	0.305089	0.41442	0.736182	0.46162	0.652706
ENST00000216106	HMGXB4	6.34592	5.82682	5.74441	6.66721	271.409	0.0520734	0.141842	0.367123	0.713528	0.960197	HMGXB4	11.348	10.5035	8.1363	7.4569	74.037	-0.279149	0.262019	-1.06538	0.286705	0.482756
ENST00000216117	HMOX1	47.4852	45.222	58.2515	61.0185	888.928	0.387512	0.0767611	5.04829	4.46e-07	1.62e-05	HMOX1	417.561	399.164	434.718	411.635	1591.69	0.212706	0.0600865	3.54	0.000400124	0.00207065
ENST00000216121	NIPSNAP1	53.2613	56.1411	56.6027	58.3728	1217.82	0.0957289	0.0654572	1.46247	0.143614	0.562232	NIPSNAP1	120.073	130.401	136.557	140.534	498.297	0.281687	0.103241	2.72844	0.00636338	0.0238463
ENST00000216122	MCM5	46.3183	46.3399	42.7591	44.9125	1680.6	-0.0557672	0.0553994	-1.00664	0.314109	0.778123	MCM5	91.4008	95.5584	93.7276	98.3827	922.198	0.166472	0.0778144	2.13935	0.0324076	0.0923407
ENST00000216124	ARSA	2.5882	2.79742	1.93204	1.95638	107.205	-0.445882	0.220622	-2.02102	0.0432772	0.286761	ARSA	9.70755	10.4728	6.29418	5.14992	52.3328	-0.705152	0.318119	-2.21663	0.0266483	0.078864
ENST00000216127	RASD2	0.521559	0.379299	0.365587	0.456956	16.0084	-0.107195	0.569087	-0.188363	0.850592	0.977985	RASD2	1.56978	2.37315	0.316951	0.635778	4.66643	-1.16035	1.14363	-1.01461	0.310291	0.509772
ENST00000216129	TTLL12	17.4974	16.1451	15.5693	14.886	584.821	-0.119568	0.0956412	-1.25018	0.211235	0.669781	TTLL12	20.2081	18.2974	26.9684	27.5734	200.725	0.622724	0.157474	3.95446	7.67e-05	0.000454931
ENST00000216133	CBX7	1.03366	0.616193	0.996249	0.715212	37.2567	0.0768405	0.386761	0.198677	0.842516	0.976002	CBX7	3.04992	1.67665	0.671784	0.673772	4.80111	-1.66129	1.1766	-1.41194	0.157967	0.316675
ENST00000216146	RPL3	645.111	639.408	659.99	657.681	9092.04	0.0607969	0.0230138	2.64175	0.00824785	0.0863791	RPL3	827.524	861.346	1188.07	1205.43	5484.23	0.655036	0.0322339	20.3214	8.32e-92	9.73e-90
ENST00000216160	TAB1	6.51603	6.4902	4.82714	5.25371	198.82	-0.343543	0.16239	-2.11554	0.0343842	0.246018	TAB1	14.6367	12.1075	11.7096	10.7376	81.8046	-0.0987874	0.250093	-0.395003	0.69284	0.828773
ENST00000216180	PNPLA3	1.00924	1.48411	1.79284	1.44945	42.6106	0.402996	0.35287	1.14205	0.253433	0.721386	PNPLA3	0.723426	1.16657	1.92806	0.878986	7.18944	0.838928	0.885707	0.947184	0.343545	0.541232
ENST00000216181	MYH9	123.411	124.747	114.983	114.572	9724.65	-0.0883807	0.0222842	-3.96608	7.31e-05	0.00163476	MYH9	87.205	88.9274	109.688	108.33	2547.2	0.446137	0.0464304	9.60873	7.34e-22	1.67e-20
ENST00000216185	TXN2	20.6744	22.2025	17.7645	18.235	283.862	-0.228174	0.135848	-1.67963	0.093029	0.450988	TXN2	134.156	135.209	151.35	152.307	313.355	0.323625	0.125611	2.57642	0.00998297	0.0348982
ENST00000216190	EIF3D	106.321	103.231	108.813	110.203	2172.35	0.0877668	0.04834	1.81562	0.0694292	0.380593	EIF3D	156.078	156.023	194.926	184.702	1254.25	0.419835	0.0663379	6.32872	2.47e-10	2.84e-09
ENST00000216194	ADSL	59.2209	63.758	64.2406	67.6073	1113.16	0.124516	0.0698166	1.78347	0.0745102	0.398509	ADSL	100.757	92.2523	89.8957	96.9535	626.106	0.102341	0.0953214	1.07365	0.282981	0.478158
ENST00000216214	FAM118A	3.19029	3.33194	3.94793	2.76338	123.372	0.0652484	0.216041	0.302018	0.762638	0.96617	FAM118A	7.60266	10.6094	8.97406	6.15832	39.0743	-0.160458	0.366335	-0.438009	0.66138	0.806321
ENST00000216218	ST13	69.7611	69.9616	71.4049	71.0409	2443.37	0.0518848	0.04509	1.1507	0.249858	0.718225	ST13	224.246	214.031	264.808	261.467	1180.83	0.399338	0.0680577	5.86763	4.42e-09	4.57e-08
ENST00000216225	RBX1	39.4962	34.3917	37.0112	38.6259	471.245	0.0577795	0.108861	0.530766	0.595581	0.923742	RBX1	457.513	457.208	497.267	512.831	681.384	0.27589	0.0882452	3.1264	0.00176958	0.00779637
ENST00000216237	L3MBTL2	12.1976	12.0433	12.6782	12.6774	426.44	0.0888976	0.109492	0.811912	0.416842	0.847252	L3MBTL2	10.9573	12.5356	11.6	11.0346	106.34	0.0409914	0.218191	0.18787	0.850979	0.924729
ENST00000216252	PHF5A	39.3461	40.198	36.4012	43.4793	452.548	0.030143	0.112315	0.26838	0.788407	0.968264	PHF5A	227.128	211.695	238.364	230.614	329.316	0.217589	0.123742	1.7584	0.0786791	0.186504
ENST00000216259	PMM1	6.97438	6.71091	6.34148	6.34109	88.2534	-0.0857455	0.239712	-0.357702	0.720566	0.960728	PMM1	39.578	34.8022	37.9712	32.9197	126.144	0.0560963	0.201383	0.278555	0.780587	0.883006
ENST00000216264	CERK	10.8541	10.964	11.3006	11.2999	531.959	0.074861	0.0979243	0.764478	0.444582	0.859978	CERK	9.20138	12.8002	4.553	3.62168	51.518	-1.40388	0.344003	-4.08102	4.48e-05	0.000276237
ENST00000216268	ZBED4	5.84467	6.63869	6.88622	6.30691	477.21	0.103829	0.108566	0.956368	0.338886	0.797141	ZBED4	5.34878	4.07303	4.96782	5.27136	76.5951	0.265519	0.260026	1.02113	0.307195	0.50645
ENST00000216271	HDAC10	0.445681	0.572993	0.490915	0.28635	12.4133	-0.366177	0.657423	-0.556989	0.577535	0.916542	HDAC10	2.18455	3.25013	1.26022	3.03349	20.989	-0.187867	0.524264	-0.358344	0.720086	0.846588
ENST00000216277	PAPOLA	40.9769	39.9806	40.2259	40.084	1964.47	0.0124484	0.0506753	0.245651	0.805952	0.969552	PAPOLA	83.1386	84.7328	68.8051	68.1007	745.439	-0.164252	0.0846921	-1.9394	0.0524522	0.136507
ENST00000216286	NID2	1.44308	1.57725	1.74665	1.76811	85.8467	0.242769	0.243054	0.998824	0.31788	0.78143	NID2	2.78374	2.95863	3.49499	3.25934	56.2058	0.373431	0.298048	1.25292	0.210234	0.387623
ENST00000216294	SNAPC1	18.9091	17.6792	18.9942	19.803	527.072	0.108603	0.099792	1.08829	0.276465	0.746117	SNAPC1	30.4472	29.5426	29.3248	32.6285	151.697	0.197773	0.182359	1.08453	0.27813	0.471851
ENST00000216297	SUPT16H	90.8252	92.683	90.8013	90.6063	4360.54	0.00743018	0.0337798	0.219959	0.825903	0.973579	SUPT16H	84.8815	89.4334	91.7977	98.8534	1260.78	0.280914	0.0674958	4.16195	3.16e-05	0.000200576
ENST00000216330	FKBP3	44.9841	46.0982	47.7057	47.391	845.32	0.0862648	0.0775434	1.11247	0.265935	0.734323	FKBP3	262.529	285.256	295.081	305.769	897.82	0.273996	0.0790869	3.46449	0.00053124	0.00266462
ENST00000216366	AP4S1	3.62228	3.9119	3.16534	4.23572	90.8222	-0.00165132	0.243532	-0.0067807	0.99459	0.99897	AP4S1	22.3225	14.5573	15.9073	20.2089	38.8633	0.11217	0.368394	0.304484	0.760759	0.870272
ENST00000216367	POLE2	13.2334	12.8465	13.0338	13.9639	242.129	0.073936	0.146214	0.505671	0.613088	0.929143	POLE2	17.9596	15.1726	21.7571	24.5492	138.396	0.610927	0.193044	3.16471	0.00155238	0.00695314
ENST00000216373	SOS2	8.42706	8.42669	8.56058	8.27409	500.199	0.0224021	0.101254	0.221246	0.824901	0.973405	SOS2	5.48598	5.52905	3.7344	4.18983	83.5213	-0.336365	0.246734	-1.36327	0.172798	0.337398
ENST00000216392	PYGL	43.4724	46.0396	47.1235	44.9822	1370.51	0.0652525	0.0623751	1.04613	0.295501	0.761603	PYGL	105.582	107.239	134.178	127.586	1325.74	0.43926	0.0646988	6.78931	1.13e-11	1.44e-10
ENST00000216410	GNPNAT1	29.3528	28.9712	29.5465	29.4632	1223.18	0.0408991	0.064143	0.637623	0.523719	0.896973	GNPNAT1	105.147	109.022	112.259	116.727	270.298	0.249138	0.135424	1.83969	0.0658142	0.162794
ENST00000216420	CGRRF1	6.45586	5.91414	7.06522	7.01127	139.95	0.210468	0.191973	1.09634	0.272929	0.741933	CGRRF1	16.1407	17.7462	10.1577	11.4612	59.6777	-0.462852	0.294949	-1.56926	0.116587	0.252649
ENST00000216442	ATP6V1D	35.7232	32.9109	40.259	38.6804	636.477	0.225845	0.0914506	2.46959	0.0135268	0.124736	ATP6V1D	97.2056	106.488	117.077	116.054	353.994	0.326963	0.120396	2.71574	0.00661277	0.0246615
ENST00000216446	PLEK2	4.3749	3.67259	4.1645	4.37246	67.6588	0.109205	0.274666	0.397592	0.690931	0.95455	PLEK2	26.0236	25.2345	34.6311	34.9732	139.895	0.571666	0.188841	3.02724	0.00246797	0.0104568
ENST00000216452	PIGH	10.9623	11.6066	8.96469	8.66283	150.894	-0.332462	0.185903	-1.78837	0.073717	0.395123	PIGH	39.9793	33.2045	28.2525	26.5369	77.9099	-0.280565	0.257124	-1.09117	0.2752	0.468396
ENST00000216455	PSMA3	142.73	144.435	140.313	136.786	1452.42	-0.0274373	0.0590015	-0.465027	0.641912	0.937899	PSMA3	426.022	421.665	523.377	506.356	1581.48	0.43241	0.0586117	7.37754	1.61e-13	2.32e-12
ENST00000216468	TMED8	8.97106	8.46527	10.3107	9.97182	789.626	0.242169	0.081321	2.97794	0.00290191	0.037897	TMED8	19.7003	21.1499	18.4183	17.432	82.1125	-0.0886443	0.247969	-0.357481	0.720732	0.846927
ENST00000216471	SAMD15	3.98395	4.46183	4.50532	4.50505	120.684	0.117408	0.206904	0.567451	0.570408	0.913882	SAMD15	3.09764	3.01789	2.37666	1.63095	22.3256	-0.505886	0.482988	-1.04741	0.294911	0.49234
ENST00000216479	AHSA1	145.285	145.706	156.541	152.447	2162.95	0.110613	0.0482226	2.29379	0.0218023	0.177646	AHSA1	325.937	315.007	335.739	341.736	1477.3	0.212819	0.0607472	3.50336	0.000459435	0.00234514
ENST00000216484	SPTLC2	13.5531	14.3327	14.1005	13.7526	1227.57	0.0223565	0.0652676	0.342537	0.731947	0.961608	SPTLC2	25.2617	27.9561	16.8018	14.4441	153.205	-0.636291	0.185356	-3.43281	0.00059736	0.00294812
ENST00000216487	AL159141.1	4.09442	3.45783	2.86256	2.94416	138.568	-0.355167	0.197384	-1.79937	0.0719606	0.390207	RIN3	6.42945	6.76476	5.82031	6.86769	83.212	0.0549334	0.247763	0.221717	0.824534	0.908013
ENST00000216489	ALKBH1	7.11145	6.5133	6.83385	7.23778	193.922	0.0705915	0.164065	0.430266	0.667002	0.946628	ALKBH1	18.7849	18.3914	17.3386	20.2158	96.3616	0.119996	0.229523	0.522807	0.601108	0.763417
ENST00000216513	SIX4	2.19058	2.02683	2.39442	1.94131	149.678	0.0639319	0.190401	0.335775	0.73704	0.961608	SIX4	2.49503	2.42481	4.9657	3.8977	35.0922	0.939424	0.384715	2.44187	0.0146114	0.0478257
ENST00000216554	EIF5	48.516	49.7876	56.3329	55.3915	3234.55	0.208668	0.0395316	5.27852	1.3e-07	5.3e-06	EIF5	101.726	103.989	108.369	107.317	597.452	0.201164	0.093443	2.1528	0.0313344	0.089924
ENST00000216602	ZFYVE21	10.0469	8.48849	8.56137	7.24911	140.732	-0.205401	0.197701	-1.03894	0.298831	0.763657	ZFYVE21	37.0061	36.4616	27.7684	23.1529	103.034	-0.400932	0.223564	-1.79337	0.0729145	0.175918
ENST00000216639	VRK1	26.5844	27.566	26.7116	26.7731	482.495	0.00619596	0.103203	0.0600367	0.952126	0.993183	VRK1	36.9057	35.9556	47.2641	46.7634	219.466	0.524859	0.149916	3.50102	0.000463487	0.00236205
ENST00000216714	APEX1	97.7475	98.6993	100.895	100.6	1558.84	0.0606462	0.0566699	1.07017	0.284544	0.752936	APEX1	227.82	223.433	277.848	274.948	1066.54	0.431922	0.0711886	6.0673	1.3e-09	1.42e-08
ENST00000216727	PABPN1	36.3875	38.8361	34.5326	35.8425	785.152	-0.0720716	0.0820344	-0.878554	0.379643	0.824849	PABPN1	17.2847	14.6698	14.6025	14.9221	61.4205	0.0407239	0.287494	0.141651	0.887355	0.94354
ENST00000216780	PCK2	10.2383	10.6878	9.30146	9.87918	235.498	-0.101607	0.148485	-0.684291	0.493792	0.883275	PCK2	16.2022	16.3294	22.2628	18.8935	155.615	0.476369	0.181131	2.62997	0.00853925	0.0305583
ENST00000216797	NFKBIA	53.6574	51.8194	48.0588	46.4383	839.487	-0.134552	0.0784916	-1.71422	0.0864876	0.433705	NFKBIA	177.167	162.406	117.82	108.566	588.3	-0.44217	0.098151	-4.50499	6.64e-06	4.73e-05
ENST00000216807	BRMS1L	5.88796	6.22857	5.8939	5.33604	165.906	-0.0855887	0.177431	-0.482378	0.629538	0.933964	BRMS1L	17.6677	20.1951	19.3154	14.1367	76.0056	-0.0832761	0.266104	-0.312945	0.754322	0.866478
ENST00000216832	PNN	42.2341	44.3346	43.0214	40.1093	1617.75	-0.0344241	0.0582744	-0.590725	0.554705	0.90693	PNN	28.9245	32.5754	33.0416	32.0779	298.532	0.219986	0.130692	1.68324	0.092328	0.211355
ENST00000216862	CYP24A1	387.952	392.273	353.745	352.378	13128.6	-0.119933	0.0191141	-6.27456	3.51e-10	1.95e-08	CYP24A1	631.352	625.255	307.547	320.467	3157.27	-0.856082	0.0432267	-19.8045	2.72e-87	2.91e-85
ENST00000216923	ZFP64	6.01463	7.37762	6.25211	6.83569	218.192	-0.00910392	0.160907	-0.0565789	0.954881	0.993183	ZFP64	13.1829	15.1403	11.1422	8.9401	108.15	-0.348612	0.225081	-1.54883	0.121423	0.260803
ENST00000216962	PYGB	72.4072	71.2327	70.0355	68.0157	3124.99	-0.0332202	0.0403382	-0.823543	0.4102	0.845111	PYGB	117.393	107.831	114.012	109.836	1252.81	0.136502	0.0693749	1.9676	0.0491144	0.129823
ENST00000216968	PROCR	46.0387	48.2174	46.63	50.1301	694.705	0.0618753	0.0872973	0.708788	0.478456	0.873709	PROCR	152.053	144.995	48.885	52.2273	305.329	-1.44095	0.137729	-10.4622	1.29e-25	3.37e-24
ENST00000217026	MYBL2	46.2195	48.147	42.8247	43.8847	1301.86	-0.0980411	0.0629758	-1.55681	0.119516	0.516807	MYBL2	24.3577	25.1502	39.9865	37.5681	292.592	0.772506	0.131343	5.88158	4.06e-09	4.22e-08
ENST00000217109	CSTF1	16.3964	14.9771	15.3407	16.0951	682.688	0.0268904	0.0891115	0.301761	0.762834	0.96622	CSTF1	52.8007	52.2388	45.3821	42.5735	272.44	-0.14918	0.135627	-1.09993	0.271363	0.46359
ENST00000217121	TPD52L2	39.2679	37.571	42.7262	42.368	1031.51	0.171256	0.0705228	2.42838	0.0151665	0.13598	TPD52L2	151.039	147.018	146.528	138.469	443.566	0.0745531	0.108188	0.68911	0.490754	0.678466
ENST00000217131	CTSZ	43.0356	44.9379	43.9776	42.297	705.459	-0.00409178	0.0857387	-0.0477239	0.961936	0.994483	CTSZ	137.579	138.428	39.7894	37.6745	345.289	-1.67872	0.132429	-12.6763	8e-37	3.09e-35
ENST00000217159	SLCO4A1	4.7238	4.96429	4.33051	4.02094	131.994	-0.190144	0.198154	-0.95958	0.337267	0.795685	SLCO4A1	6.26535	4.76019	6.5392	7.26125	59.3673	0.425458	0.293392	1.45014	0.14702	0.300418
ENST00000217169	BIRC7	1.04139	1.47014	0.157444	0.629736	11.8105	-1.64965	0.7478	-2.206	0.0273842	0.208907	BIRC7	0.700606	1.41221	1.6975	1.41877	5.10683	0.71342	1.05052	0.679112	0.497067	0.682832
ENST00000217173	UBOX5	3.66784	3.97174	3.71216	3.61425	173.447	-0.0363418	0.172944	-0.210136	0.833561	0.975453	UBOX5	7.33241	5.57489	7.79195	6.72091	47.9228	0.274953	0.326826	0.841281	0.400191	0.597633
ENST00000217182	EEF1A2	48.6256	50.974	39.3288	40.807	858.263	-0.289648	0.0782243	-3.70278	0.000213248	0.0042402	EEF1A2	112.432	111.951	116.175	110.309	697.382	0.200236	0.0878992	2.27801	0.0227258	0.0691598
ENST00000217195	C20orf27	63.0151	61.8198	55.1691	51.0525	810.417	-0.208913	0.0808227	-2.58483	0.00974264	0.0980467	C20orf27	141.985	123.362	105.068	102.83	309.386	-0.20721	0.12938	-1.60156	0.109252	0.240884
ENST00000217289	FERMT1	10.2961	11.3903	11.3965	11.0288	612.596	0.0723844	0.0939804	0.770208	0.441177	0.857936	FERMT1	16.8587	15.2298	20.2989	19.4847	162.286	0.42968	0.176096	2.44003	0.014686	0.0479962
ENST00000217381	SNTA1	3.36337	4.43501	3.56224	4.93934	97.1851	0.148655	0.245492	0.605538	0.544822	0.903857	SNTA1	3.99646	4.30562	3.83981	4.18606	27.1627	0.055707	0.428764	0.129925	0.896626	0.949022
ENST00000217402	CHMP4B	22.3426	22.6476	19.8624	18.6813	360.509	-0.199082	0.120121	-1.65735	0.0974495	0.461528	CHMP4B	231.461	221.066	206.256	214.038	641.835	0.00820929	0.0913096	0.0899061	0.928362	0.96578
ENST00000217426	AHCY	161.309	158.033	156.497	153.703	3648.23	-0.0178715	0.0371764	-0.480723	0.630713	0.934092	AHCY	345.712	345.179	410.811	411.048	2187.05	0.394261	0.0496581	7.9395	2.03e-15	3.3e-14
ENST00000217446	PIGU	23.5843	21.5804	23.4868	25.3513	413.692	0.136844	0.113864	1.20183	0.22943	0.69426	PIGU	62.8742	61.4329	23.2576	20.605	235.984	-1.3814	0.155095	-8.90678	5.25e-19	1.03e-17
ENST00000217455	ACOT8	7.15216	8.49724	6.46106	8.00758	93.6611	-0.0891038	0.239596	-0.371892	0.709973	0.959499	ACOT8	21.3798	16.9303	22.9933	23.3265	94.064	0.317871	0.233337	1.36229	0.173108	0.337844
ENST00000217456	APMAP	90.0316	92.4027	90.8031	92.9912	2173.97	0.0347575	0.0483815	0.718404	0.472508	0.871338	APMAP	145.879	171.135	48.2344	53.8653	559.779	-1.51149	0.112327	-13.4561	2.83e-41	1.2e-39
ENST00000217515	TXNL1	9.21128	9.24671	8.12177	7.12338	620.941	-0.251865	0.0943657	-2.66904	0.00760693	0.0807233	TXNL1	142.318	140.522	159.574	142.784	558.424	0.247035	0.0980409	2.51971	0.0117452	0.0400525
ENST00000217901	IDH3G	28.4638	30.6049	30.5212	29.3395	428.019	0.0432571	0.110682	0.390824	0.695927	0.956201	IDH3G	68.5311	61.7517	74.6552	77.6733	370.499	0.38223	0.117882	3.24247	0.00118497	0.00545747
ENST00000217909	SLC25A43	16.7545	14.6677	17.4257	16.2518	440.081	0.124021	0.112497	1.10244	0.270271	0.73949	SLC25A43	17.7555	17.4836	16.3179	16.8621	78.4499	-0.0216292	0.252332	-0.0857174	0.931691	0.967618
ENST00000217958	PSMD10	47.4747	49.0847	53.7934	51.147	798.751	0.14412	0.0805534	1.78912	0.0735948	0.39464	PSMD10	210.32	195.212	252.181	247.689	681.3	0.427282	0.0893571	4.78173	1.74e-06	1.34e-05
ENST00000217971	PGRMC1	86.4592	84.6289	88.4719	86.7899	1754.51	0.0588059	0.0536698	1.0957	0.273211	0.742372	PGRMC1	272.307	276.963	145.703	139.63	528.673	-0.816438	0.101612	-8.03488	9.37e-16	1.55e-14
ENST00000218004	NXT2	8.89435	8.83325	9.79151	9.67389	270.008	0.158951	0.137663	1.15464	0.248237	0.716522	NXT2	46.9845	48.4215	35.949	40.3477	110.979	-0.18629	0.213302	-0.873361	0.382466	0.581396
ENST00000218089	STAG2	43.4904	43.7704	41.9818	44.6155	2445.44	0.0130324	0.0466643	0.27928	0.78003	0.968264	STAG2	34.1382	34.3508	29.7209	31.7427	545.209	-0.0404923	0.0982947	-0.411948	0.680377	0.819403
ENST00000218104	ABCD1	1.18046	1.15813	1.11627	0.887235	42.9176	-0.199094	0.3436	-0.579436	0.562295	0.910093	ABCD1	1.68145	1.9771	1.13166	1.13501	15.0818	-0.575337	0.591635	-0.972453	0.330825	0.529466
ENST00000218230	PCSK1N	6.29832	5.81971	1.43435	0.922026	39.7696	-2.33851	0.423969	-5.51575	3.47e-08	1.53e-06	PCSK1N	17.6661	18.0745	3.24265	3.9027	35.3389	-2.19215	0.439324	-4.98983	6.04e-07	4.95e-06
ENST00000218340	RP2	5.23442	5.58755	5.61972	5.61937	220.072	0.0786089	0.153189	0.51315	0.607847	0.927992	RP2	36.5863	33.066	33.0009	33.5818	159.997	0.0581197	0.176108	0.330022	0.741383	0.860018
ENST00000218348	USP11	18.4589	19.8045	19.0965	20.2593	698.516	0.0646579	0.0874293	0.739546	0.459576	0.867914	USP11	59.4761	57.1753	55.2429	52.9478	718.49	0.0444325	0.0870373	0.510499	0.609702	0.769573
ENST00000218388	TIMP1	127.307	130.064	145.846	131.773	1109.37	0.133291	0.0705175	1.89018	0.0587338	0.347309	TIMP1	447.147	455.062	203.237	209.966	892.404	-0.948896	0.0804388	-11.7965	4.07e-32	1.34e-30
ENST00000219066	NTHL1	32.856	29.7146	24.802	27.4577	330.044	-0.235754	0.128623	-1.83291	0.0668159	0.373941	NTHL1	54.6488	53.5042	55.1251	57.9984	215.359	0.174873	0.150767	1.15988	0.246096	0.43345
ENST00000219069	ZNF263	15.6615	14.9637	16.1586	15.1338	547.852	0.0551197	0.0978555	0.563276	0.573247	0.915537	ZNF263	4.17765	4.10775	7.28291	4.45696	45.1338	0.586952	0.350062	1.67671	0.0935991	0.213596
ENST00000219070	MMP2	7.60445	7.62737	7.02291	7.47072	281.522	-0.0476259	0.135511	-0.351454	0.725248	0.961423	MMP2	6.95935	6.05754	9.83604	9.99327	72.6132	0.679056	0.264994	2.56253	0.0103913	0.036152
ENST00000219097	ORC6	18.3171	18.7211	17.7517	15.3449	305.191	-0.1383	0.132922	-1.04047	0.298124	0.76327	ORC6	54.6806	46.7599	42.8236	36.9104	148.653	-0.199345	0.18641	-1.06939	0.284893	0.480667
ENST00000219139	C16orf70	8.76859	8.31999	8.60424	7.66774	262.272	-0.0466182	0.142155	-0.32794	0.742957	0.961959	C16orf70	23.5826	24.765	17.9806	18.2342	117.216	-0.288146	0.207508	-1.3886	0.164954	0.32578
ENST00000219150	CORO1A	3.03669	1.99416	2.03856	1.63075	42.2318	-0.431328	0.361101	-1.19448	0.23229	0.698455	CORO1A	0.603849	1.06503	1.0973	0.917119	5.5364	0.424068	0.997716	0.425038	0.670809	0.813321
ENST00000219169	NUTF2	66.8783	66.4128	78.0182	76.4779	1645.68	0.237025	0.05524	4.29082	1.78e-05	0.000467914	NUTF2	952.938	938.88	856.366	884.201	1527.33	0.015115	0.0598537	0.252533	0.800629	0.894732
ENST00000219204	ARL2BP	45.1134	46.8129	47.6274	49.8644	1005.64	0.108848	0.0718051	1.51588	0.12955	0.535937	ARL2BP	146.445	144.583	129.825	147.329	306.595	0.0676374	0.129115	0.523855	0.60038	0.76311
ENST00000219207	PLLP	3.32989	3.22057	3.92841	2.10438	50.7609	-0.0947787	0.335911	-0.282155	0.777825	0.968264	PLLP	7.26526	9.24922	0.463236	1.39382	10.8236	-3.06688	0.930659	-3.29539	0.000982851	0.00460187
ENST00000219240	DHODH	4.79566	5.07547	5.33059	4.70053	250.509	0.0472319	0.145682	0.324213	0.745776	0.962871	DHODH	16.3853	15.9812	14.5139	13.9147	79.5127	-0.122957	0.251383	-0.48912	0.624756	0.780331
ENST00000219252	POLR2C	45.075	46.4627	47.1496	46.1942	879.22	0.052227	0.0762165	0.685246	0.493189	0.883275	POLR2C	253.827	255.819	249.248	240.146	901.883	0.103808	0.0773884	1.34139	0.179794	0.347038
ENST00000219255	PARD6A	2.35727	2.5536	1.17805	1.34626	24.9467	-0.93603	0.462422	-2.02419	0.0429507	0.285289	PARD6A	1.40796	1.82445	1.462	1.22194	6.60957	-0.116052	0.901828	-0.128686	0.897606	0.94931
ENST00000219271	MMP15	4.60699	4.52632	4.36916	3.48994	185.948	-0.192753	0.172181	-1.11948	0.262935	0.732105	MMP15	4.78521	5.34699	2.14238	2.40151	32.4356	-1.14625	0.411502	-2.78553	0.00534404	0.0205103
ENST00000219281	USB1	3.48977	3.41691	3.83062	4.95147	95.1686	0.370624	0.236856	1.56477	0.117638	0.512633	USB1	51.2103	53.7298	51.2217	51.3732	181.58	0.12077	0.164664	0.733428	0.463298	0.654555
ENST00000219299	CCDC113	2.52658	2.47997	2.68911	2.54952	145.629	0.0894046	0.187717	0.476273	0.63388	0.934753	CCDC113	8.12232	7.25585	7.1562	9.4203	41.1746	0.146575	0.353365	0.414798	0.67829	0.817763
ENST00000219302	NME3	18.3466	18.04	9.23424	10.5107	161.355	-0.857883	0.184503	-4.6497	3.32e-06	0.000102198	NME3	64.2402	54.7838	40.4084	42.5294	113.014	-0.384407	0.214416	-1.79281	0.073003	0.175994
ENST00000219313	PSMD7	95.9982	94.2405	94.7774	89.2991	1645.52	-0.0234736	0.0564906	-0.415531	0.677753	0.949746	PSMD7	234.556	223.192	265.417	247.151	1036.58	0.318499	0.0740783	4.29949	1.71e-05	0.000114308
ENST00000219315	SETD6	6.68273	7.10338	5.61252	7.30259	111.753	-0.0700923	0.220248	-0.318243	0.750301	0.964026	SETD6	5.88529	7.11779	6.59499	6.61451	40.6789	0.142377	0.352669	0.403714	0.686423	0.82452
ENST00000219345	PLA2G15	3.39736	3.51854	2.96256	3.11829	94.3346	-0.1616	0.232582	-0.694808	0.487175	0.880343	PLA2G15	8.61474	9.53358	3.6834	4.51526	34.5228	-0.994499	0.395626	-2.51374	0.011946	0.0406033
ENST00000219368	FA2H	5.02885	4.92669	5.41449	4.49725	128.8	0.0176612	0.202568	0.0871865	0.930523	0.988063	FA2H	19.0821	23.0029	11.3318	11.5927	79.4729	-0.766967	0.259803	-2.95211	0.00315611	0.0129818
ENST00000219431	MPG	27.5364	31.097	16.8129	19.1885	303.734	-0.679604	0.137442	-4.94467	7.63e-07	2.6e-05	MPG	55.815	57.1946	45.2665	48.5218	202.215	-0.136632	0.156746	-0.871678	0.383384	0.582076
ENST00000219439	HSDL1	9.78922	10.7072	9.93151	9.90212	396.545	-0.0233739	0.115319	-0.202689	0.839378	0.976002	HSDL1	36.273	39.1083	24.7817	33.3109	144.534	-0.237167	0.192197	-1.23398	0.217211	0.396672
ENST00000219476	TSC2	7.57952	7.79574	6.77727	6.4331	494.015	-0.194902	0.102648	-1.89874	0.0575981	0.342863	TSC2	11.477	11.1789	9.1914	9.31219	243.998	-0.15742	0.142347	-1.10589	0.268775	0.460942
ENST00000219478	ZNF500	2.98868	2.98855	2.56046	2.10955	166.987	-0.332029	0.179985	-1.84476	0.0650726	0.3688	ZNF500	0.869919	1.60737	0.878218	0.704653	7.04326	-0.286399	0.887816	-0.322588	0.747007	0.863309
ENST00000219481	DECR2	8.27198	8.85116	6.22912	5.21319	119.234	-0.557532	0.212638	-2.62198	0.00874214	0.0906418	DECR2	17.6367	18.9762	18.4787	12.7417	66.0085	-0.138051	0.282472	-0.488724	0.625037	0.780524
ENST00000219548	STUB1	37.3223	39.2721	33.6204	30.8756	509.284	-0.223987	0.102424	-2.18685	0.0287531	0.21509	STUB1	61.5547	72.9177	60.1014	58.6048	162.689	0.0504369	0.180612	0.279256	0.780048	0.883006
ENST00000219599	CRYM	1.10282	0.551384	0.425162	0.708559	11.1213	-0.521093	0.714204	-0.729613	0.465627	0.87013	CRYM	5.31925	4.24413	4.833	4.03941	18.5326	0.0772961	0.522371	0.147972	0.882365	0.940759
ENST00000219611	CAPN15	6.06872	6.25235	2.4492	2.59943	228.074	-1.26312	0.158691	-7.9596	1.73e-15	1.45e-13	CAPN15	3.90903	3.10011	6.59877	6.22898	70.9071	1.00156	0.273478	3.66231	0.000249952	0.0013452
ENST00000219689	USP31	4.49113	4.911	5.07456	5.13314	565.763	0.142647	0.0968169	1.47337	0.140651	0.556294	USP31	3.037	2.64581	3.36737	3.37733	54.4755	0.385463	0.304448	1.26611	0.205475	0.38093
ENST00000219746	TOX3	0.494366	0.477866	0.487063	0.508208	26.3042	0.0578237	0.434654	0.133034	0.894167	0.983432	TOX3	1.44987	0.974165	0.439109	2.20204	9.7044	0.204728	0.798457	0.256405	0.797638	0.893329
ENST00000219782	MAZ	43.0704	45.6127	42.7377	41.6064	1258.16	-0.0483282	0.064638	-0.747675	0.454656	0.865766	MAZ	37.8318	36.137	23.5997	24.0125	195.718	-0.501086	0.160791	-3.11638	0.00183083	0.00804333
ENST00000219837	KNOP1	15.6133	15.9562	14.5046	15.8772	1072.32	-0.0312828	0.0710227	-0.440462	0.659602	0.944628	KNOP1	24.4641	28.6379	27.0599	24.3705	156.787	0.0864455	0.181003	0.477591	0.632941	0.786352
ENST00000219905	MGA	13.6944	13.5106	12.645	12.7576	1707.25	-0.0748571	0.0542688	-1.37938	0.167779	0.606337	MGA	4.26871	4.82855	4.53865	3.42096	171.97	-0.0699613	0.180362	-0.387893	0.698095	0.832887
ENST00000220003	CSK	9.59833	10.2771	9.48816	9.60143	290.59	-0.0341568	0.133674	-0.255523	0.798319	0.968264	CSK	42.684	39.2783	32.0374	30.441	213.287	-0.241166	0.15394	-1.56663	0.117202	0.253849
ENST00000220058	MTFMT	12.231	12.9149	12.8878	13.2312	379.542	0.0788242	0.116771	0.675033	0.499655	0.88546	MTFMT	19.8583	23.6204	22.3234	21.3026	112.035	0.130079	0.21452	0.606375	0.544266	0.719397
ENST00000220166	CTSH	6.45541	6.79094	6.52147	6.76082	156.615	0.0279567	0.181294	0.154206	0.877447	0.981012	CTSH	30.9535	27.4278	39.2603	29.0275	138.964	0.336591	0.19999	1.68303	0.0923684	0.211408
ENST00000220325	EHD4	4.55766	5.25959	5.34836	5.29882	353.233	0.141136	0.124241	1.13599	0.255962	0.724568	EHD4	26.3709	24.6332	37.2455	35.1675	222.146	0.653675	0.15058	4.34104	1.42e-05	9.61e-05
ENST00000220429	GABPB1	15.8581	14.8082	17.1429	17.9894	483.796	0.220173	0.104206	2.11287	0.0346117	0.247072	GABPB1	45.456	36.7569	36.2849	35.9641	201.843	5.86e-05	0.161244	0.000363432	0.99971	0.999871
ENST00000220496	DNAJC17	2.34988	2.21801	2.39889	2.37052	93.6768	0.0863121	0.232715	0.370892	0.710718	0.959656	DNAJC17	10.0728	12.2283	14.1439	15.2984	51.5594	0.609839	0.315715	1.93161	0.0534072	0.138163
ENST00000220507	RHOV	8.46903	7.03245	8.14661	6.42779	133.741	-0.0649731	0.205563	-0.316074	0.751947	0.964633	RHOV	16.2188	13.6713	18.2193	10.0324	44.7343	-0.022489	0.358304	-0.0627652	0.949953	0.976111
ENST00000220509	VPS18	11.9784	12.4207	12.8186	12.2216	516.488	0.0614599	0.100129	0.61381	0.539341	0.902131	VPS18	14.591	13.4801	11.9575	11.2107	164.417	-0.0617962	0.174875	-0.353374	0.723808	0.848208
ENST00000220514	OIP5	12.4517	12.6553	13.0285	15.5633	173.947	0.211562	0.175386	1.20626	0.227716	0.69179	OIP5	25.8317	28.791	34.239	32.8633	147.041	0.272983	0.183317	1.48913	0.136454	0.284562
ENST00000220562	EXTL3	7.76333	7.51449	7.12788	7.66392	666.296	-0.0226022	0.0888719	-0.254324	0.799246	0.968264	EXTL3	5.14947	6.18208	5.32091	6.34878	69.3586	0.186507	0.271848	0.686072	0.492668	0.679619
ENST00000220592	AGO2	7.60357	6.92017	7.66296	7.11568	1152.95	0.0491211	0.0708577	0.693235	0.488162	0.881013	AGO2	14.502	15.2691	10.7963	12.9938	149.698	-0.195127	0.184285	-1.05883	0.289676	0.486484
ENST00000220659	BRF2	3.57519	3.41544	3.56887	3.56865	97.5069	0.054031	0.22817	0.236802	0.812811	0.970471	BRF2	6.47768	6.69593	7.44494	6.45792	47.714	0.183837	0.324044	0.567323	0.570495	0.740555
ENST00000220669	ZFAND1	14.5178	14.8913	16.06	15.3859	358.376	0.120644	0.119856	1.00657	0.31414	0.778123	ZFAND1	22.0726	20.1521	27.3689	34.0758	94.9904	0.721113	0.233677	3.08594	0.0020291	0.00880509
ENST00000220751	RIPK2	9.74389	9.02894	8.34777	8.72288	243.009	-0.113097	0.146692	-0.770983	0.440717	0.857936	RIPK2	19.3315	18.3143	20.9211	19.2605	136.877	0.178397	0.190884	0.934581	0.350004	0.547846
ENST00000220763	CPQ	0.84595	0.507547	0.9784	0.652227	15.5539	0.292682	0.586562	0.498979	0.617794	0.931641	CPQ	4.42332	4.01224	0.714483	1.0749	15.4146	-1.94824	0.648393	-3.00471	0.00265831	0.0111526
ENST00000220764	DECR1	16.1957	16.9056	13.9259	17.2731	478.286	-0.061326	0.112724	-0.544037	0.586416	0.919763	DECR1	60.4529	64.4868	78.5206	80.5198	319.406	0.495723	0.125539	3.94875	7.86e-05	0.00046546
ENST00000220772	SFRP1	8.45745	7.45028	8.46894	8.72719	398.491	0.13638	0.116729	1.16834	0.242669	0.710767	SFRP1	34.7968	33.9531	7.51799	7.54024	86.8126	-2.03647	0.275097	-7.40272	1.33e-13	1.93e-12
ENST00000220809	PLAT	1.62797	1.84139	1.40614	1.88618	55.8003	-0.0514938	0.305515	-0.168548	0.866152	0.979578	PLAT	5.07711	5.74099	3.30035	3.46058	31.8799	-0.54255	0.400244	-1.35555	0.175243	0.341097
ENST00000220822	GDAP1	8.60905	7.98096	7.98056	7.83603	318.359	-0.0448497	0.128056	-0.350236	0.726162	0.961423	GDAP1	26.4378	24.6861	29.673	29.5246	131.299	0.309645	0.194234	1.59419	0.110894	0.243465
ENST00000220849	EIF3E	190.96	193.821	191.385	192.775	4191.23	0.0217107	0.0343666	0.631737	0.527558	0.898543	EIF3E	353.441	342.346	475.351	451.485	2405.27	0.533459	0.0490139	10.8838	1.38e-27	3.89e-26
ENST00000220853	EMC2	9.24462	9.52224	9.0217	9.79524	357.341	0.0278917	0.120951	0.230603	0.817623	0.972026	EMC2	67.719	67.5421	85.1605	78.5795	295.773	0.437329	0.129917	3.36622	0.000762055	0.00368793
ENST00000220913	CHRAC1	20.7508	19.9265	20.9522	21.2049	554.083	0.0755826	0.096347	0.784483	0.432757	0.854526	CHRAC1	88.7185	100.123	61.1401	68.4213	136.168	-0.431775	0.196026	-2.20264	0.0276198	0.0812784
ENST00000220966	PYCR3	14.5251	13.548	10.8623	11.0577	360.535	-0.332914	0.121006	-2.75123	0.00593719	0.0663588	PYCRL	20.9267	20.11	18.2768	18.6265	72.9938	0.0328525	0.261622	0.125572	0.900071	0.950291
ENST00000221086	MTMR9	7.27056	7.16638	6.89619	7.26651	545.874	-0.00362776	0.0972958	-0.0372859	0.970257	0.995175	MTMR9	9.88761	14.309	10.9033	8.62527	70.9785	-0.119268	0.279489	-0.426736	0.669572	0.812706
ENST00000221114	DCTN6	34.7343	37.2913	41.9462	41.047	440.706	0.228528	0.108759	2.10123	0.0356211	0.251168	DCTN6	150.908	161.691	155.306	161.551	394.874	0.144984	0.114037	1.27138	0.203595	0.378275
ENST00000221130	GSR	130.874	128.74	131.355	130.62	4266.12	0.0370979	0.0340947	1.08808	0.276558	0.746205	GSR	335.702	341.562	277.638	286.559	2124.51	-0.123431	0.0510892	-2.41599	0.0156925	0.0508006
ENST00000221132	TNFRSF10A	14.7337	13.2749	16.3183	15.1072	431.19	0.190085	0.112255	1.69332	0.0903937	0.444347	TNFRSF10A	27.2129	26.9769	16.0331	13.1897	125.179	-0.691859	0.206232	-3.35476	0.000794338	0.00382028
ENST00000221138	PPP2CB	28.1774	29.184	27.6838	26.0633	582.695	-0.0698564	0.094653	-0.738026	0.460498	0.867914	PPP2CB	116.214	130.519	105.591	109.461	466.999	-0.055801	0.107527	-0.51895	0.603795	0.764869
ENST00000221200	KCTD9	21.6007	21.5998	21.6767	21.5194	784.171	0.0238895	0.0804296	0.297024	0.766448	0.96685	KCTD9	65.121	63.2882	60.6851	64.3427	326.771	0.0634687	0.124646	0.509192	0.610618	0.770503
ENST00000221233	EXOSC5	52.5686	54.6132	51.0343	47.6642	553.688	-0.0949217	0.0973679	-0.974877	0.329621	0.789409	EXOSC5	164.359	167.142	165.748	187.828	530.962	0.224533	0.101929	2.20285	0.0276057	0.0812588
ENST00000221265	PAF1	45.6882	45.8719	41.5286	40.4283	1028.57	-0.135817	0.0703366	-1.93096	0.053488	0.328074	PAF1	48.6237	48.8734	40.011	39.0147	311.669	-0.157135	0.126696	-1.24025	0.214883	0.393742
ENST00000221307	CYP4F3	2.66843	2.55511	2.26531	2.28596	133.07	-0.174728	0.196755	-0.888048	0.374515	0.820498	CYP4F3	3.21201	1.88838	1.13493	0.813062	12.0418	-1.31102	0.709256	-1.84844	0.0645382	0.160233
ENST00000221327	ZNF180	9.06729	9.06689	8.62406	8.81732	415.664	-0.0321579	0.111069	-0.289531	0.772175	0.967391	ZNF180	4.32445	5.06791	4.02051	4.03241	38.579	-0.167664	0.361753	-0.463475	0.643024	0.792859
ENST00000221418	ECH1	103.783	100.986	94.0759	93.6326	1269.14	-0.10147	0.0632851	-1.60338	0.10885	0.489568	ECH1	436.233	439.657	475.009	443.158	1954.04	0.209685	0.0542836	3.86276	0.000112113	0.00064573
ENST00000221419	HNRNPL	173.623	173.781	190.693	184.137	4812.37	0.133654	0.0325513	4.10596	4.03e-05	0.000967599	HNRNPL	354.703	348.318	350.977	353.595	2743.06	0.139627	0.0443626	3.1474	0.00164732	0.00732807
ENST00000221455	CLASRP	12.0617	11.7679	8.85725	11.2593	263.876	-0.220315	0.147607	-1.49258	0.135548	0.545732	CLASRP	11.0482	13.3203	11.508	10.2875	101.876	-0.0106549	0.225225	-0.0473076	0.962268	0.982248
ENST00000221459	LIN7B	3.6149	3.17659	2.53387	1.26686	21.2507	-0.813474	0.511875	-1.5892	0.112014	0.497971	LIN7B	4.37061	4.40492	5.29476	3.67645	12.3559	0.0768521	0.645992	0.118968	0.905301	0.953227
ENST00000221462	PPP1R37	11.9	10.679	8.12743	7.02195	299.131	-0.551708	0.137669	-4.0075	6.14e-05	0.00140613	PPP1R37	7.755	9.03394	8.29668	6.97515	73.1394	0.00400415	0.265247	0.015096	0.987956	0.995199
ENST00000221480	PEX11G	1.74354	1.44025	1.46125	0.876694	16.0255	-0.421524	0.57621	-0.731546	0.464446	0.869684	PEX11G	4.04278	4.94763	3.4983	4.21038	12.7196	-0.137099	0.640803	-0.213949	0.830587	0.91195
ENST00000221486	RNASEH2A	16.8306	16.6517	15.8304	16.0202	484.752	-0.0480389	0.102781	-0.46739	0.640221	0.937899	RNASEH2A	90.7742	89.3756	102.637	110.859	391.378	0.382565	0.114101	3.35286	0.000799799	0.00384207
ENST00000221494	SF3A2	8.98452	10.2459	7.32964	6.48601	144.025	-0.453042	0.194063	-2.33451	0.0195688	0.163777	SF3A2	29.5473	30.535	47.0604	42.4614	233.666	0.703039	0.147682	4.76048	1.93e-06	1.48e-05
ENST00000221496	AMH	1.31003	1.67134	0.290257	0.348287	17.5569	-2.19904	0.628887	-3.49671	0.000471031	0.00839143	AMH	0.124274	0.2505	0.90331	0.301994	2.9498	1.83824	1.52336	1.2067	0.227546	NA
ENST00000221543	TBC1D17	5.49992	5.34366	4.86227	4.76172	115.533	-0.148103	0.210609	-0.703212	0.481923	0.877366	TBC1D17	16.5392	17.102	15.4827	14.7455	138.584	-0.00352773	0.189357	-0.01863	0.985136	0.993805
ENST00000221561	TLE5	78.8994	80.4139	79.653	75.3007	1595.88	-0.0159927	0.0571906	-0.279639	0.779755	0.968264	AES	167.921	170.036	110.176	126.197	497.9	-0.370391	0.104951	-3.52919	0.000416831	0.00214546
ENST00000221566	SGTA	32.7827	32.3784	23.7237	24.6636	682.052	-0.405345	0.0874092	-4.63733	3.53e-06	0.000107699	SGTA	85.8246	77.983	79.7299	75.103	328.529	0.0675997	0.125007	0.540769	0.588667	0.755452
ENST00000221573	SNAPC2	9.08583	8.54783	6.83979	7.66838	131.594	-0.25743	0.199594	-1.28977	0.197131	0.652383	SNAPC2	17.0858	18.48	16.155	18.2282	77.8211	0.0659389	0.254389	0.259205	0.795477	0.891951
ENST00000221665	FIZ1	3.36762	3.58373	2.06457	2.54085	82.2617	-0.569901	0.254177	-2.24214	0.0249522	0.195798	FIZ1	4.20929	5.37362	3.39955	3.06865	26.5746	-0.382729	0.439551	-0.870727	0.383903	0.582579
ENST00000221671	C19orf44	1.90498	1.6851	1.16125	1.28672	54.3769	-0.528403	0.308285	-1.71401	0.0865267	0.433705	C19orf44	0.84741	1.06758	2.05319	1.02963	12.0032	0.732351	0.678635	1.07915	0.28052	0.474699
ENST00000221801	FBL	144.261	154.714	140.673	147.665	1780.85	-0.0282093	0.0559825	-0.503895	0.614335	0.929143	FBL	520.109	518.948	651.884	626.944	2469.98	0.439457	0.0473569	9.27969	1.7e-20	3.62e-19
ENST00000221856	FSD1	4.36903	4.63632	3.78122	3.83828	82.0896	-0.217039	0.249024	-0.871558	0.383449	0.827006	FSD1	6.87517	9.33313	5.94922	5.45538	45.6817	-0.373698	0.336975	-1.10898	0.26744	0.459544
ENST00000221859	POLR2I	144.991	145.538	131.328	133.927	663.462	-0.107259	0.0877805	-1.2219	0.221744	0.682733	POLR2I	373.021	350.699	385.798	357.851	607.069	0.176586	0.095255	1.85382	0.0637645	0.158567
ENST00000221891	APLP1	9.10533	9.82547	7.74459	9.30135	241.866	-0.127247	0.151186	-0.841658	0.399979	0.839167	APLP1	28.543	32.107	5.30978	5.45538	149.618	-2.33131	0.219982	-10.5977	3.05e-26	8.17e-25
ENST00000221930	TGFB1	7.87792	7.90697	7.1395	6.19475	218.066	-0.219379	0.156223	-1.40426	0.16024	0.593938	TGFB1	77.0882	82.7291	25.9412	24.0666	268.316	-1.54893	0.147805	-10.4795	1.07e-25	2.83e-24
ENST00000221957	PLIN3	41.1157	42.3952	37.2634	35.9438	942.42	-0.16594	0.0740174	-2.24191	0.0249671	0.195798	PLIN3	92.6845	100.685	97.5186	95.8588	565.811	0.138225	0.0975704	1.41667	0.15658	0.314964
ENST00000221992	CEACAM5	1.42383	1.49379	1.49978	1.28974	53.8514	-0.0407445	0.305723	-0.133273	0.893978	0.983379	CEACAM5	0.396544	0.299743	0.480393	0.481814	4.0987	0.788272	1.1782	0.669048	0.503465	0.687586
ENST00000222005	CDC37	74.1933	75.5537	67.2407	68.4048	1244.27	-0.118645	0.0638412	-1.85843	0.0631073	0.361686	CDC37	178.955	176.463	175.086	165.09	874.161	0.0880324	0.0798671	1.10224	0.270359	0.462636
ENST00000222008	RABAC1	80.1933	70.384	40.7458	37.523	461.462	-0.919981	0.113983	-8.07123	6.96e-16	6.04e-14	RABAC1	382.953	380.272	273.89	285.67	804.007	-0.286564	0.0823759	-3.47874	0.000503784	0.00254024
ENST00000222032	CNFN	9.50574	8.73877	7.09294	7.09251	46.5473	-0.339024	0.329184	-1.02989	0.30306	0.767145	CNFN	43.496	50.0999	38.3907	43.0342	64.0177	-0.0774972	0.282238	-0.274581	0.783638	0.884843
ENST00000222120	RAB3D	10.4461	9.36641	8.79252	8.37096	422.377	-0.18305	0.113484	-1.613	0.106744	0.483623	RAB3D	41.3112	40.0342	26.9481	30.1167	100.04	-0.324745	0.226643	-1.43285	0.151901	0.307903
ENST00000222122	DBP	2.67375	2.523	1.74218	1.40334	48.6995	-0.700293	0.328165	-2.13397	0.0328455	0.238328	DBP	5.35335	5.17956	6.4853	4.68324	27.4638	0.639139	0.427106	1.49644	0.134539	0.282079
ENST00000222139	EPOR	2.03365	1.62685	1.82938	1.65505	46.4282	-0.0471144	0.331271	-0.142223	0.886904	0.98224	EPOR	3.42488	4.83247	1.49366	2.1639	19.6691	-1.06991	0.53325	-2.00639	0.0448148	0.120567
ENST00000222219	DNASE2	14.1258	11.8061	9.80789	11.5954	247.099	-0.252873	0.153941	-1.64266	0.100453	0.469813	DNASE2	69.4002	71.8934	23.8875	27.7164	221.893	-1.30206	0.1588	-8.19936	2.42e-16	4.12e-15
ENST00000222224	LENG1	6.86414	7.51472	6.38758	7.37569	104.747	-0.0390663	0.223052	-0.175145	0.860966	0.979578	LENG1	17.3984	21.7859	22.674	19.8584	71.9457	0.284288	0.267899	1.06118	0.28861	0.485154
ENST00000222247	RPL18A	821.441	826.431	680.444	679.905	5137.17	-0.252589	0.0309624	-8.15793	3.41e-16	3.04e-14	RPL18A	1172.41	1182.02	1528.58	1516.77	3166.61	0.511662	0.0412731	12.397	2.71e-35	9.83e-34
ENST00000222250	ARRDC2	9.90035	8.91973	6.46633	7.97746	224.02	-0.357786	0.159333	-2.24552	0.0247347	0.194594	ARRDC2	6.66867	8.27203	7.04301	5.81729	37.9962	-0.214339	0.364807	-0.587541	0.55684	0.729866
ENST00000222254	PIK3R2	6.13917	6.1389	5.1452	5.14489	241.953	-0.23079	0.146071	-1.57999	0.114109	0.503486	PIK3R2	3.82382	5.68441	6.02207	5.45913	50.1114	0.438989	0.32382	1.35566	0.175208	0.341083
ENST00000222284	TMEM147	225.574	217.844	234.227	221.994	2105.28	0.0650937	0.0503484	1.29287	0.196058	0.650612	TMEM147	565.448	549.22	297.716	308.034	1262.86	-0.720339	0.06754	-10.6654	1.48e-26	4.02e-25
ENST00000222329	ERF	28.1979	27.0651	18.3933	18.5494	663.052	-0.556989	0.0893307	-6.23513	4.51e-10	2.48e-08	ERF	40.3846	41.5976	34.6159	38.2673	322.43	-0.0825862	0.126143	-0.654702	0.512659	0.693105
ENST00000222330	GSK3A	37.1144	37.9698	38.788	40.6052	913.431	0.104551	0.0750667	1.39277	0.16369	0.599336	GSK3A	78.3828	82.4834	62.3153	64.9507	457.774	-0.188173	0.106361	-1.76918	0.0768634	0.183349
ENST00000222339	ZNF574	13.3605	13.7797	14.3447	13.487	490.403	0.06034	0.10296	0.586056	0.557838	0.908236	ZNF574	17.4337	20.0603	16.5882	14.7506	220.899	-0.105738	0.153689	-0.688	0.491453	0.678472
ENST00000222345	SIPA1L3	17.0605	16.8249	14.4586	13.5	1333.3	-0.253342	0.0630121	-4.02053	5.81e-05	0.00133332	SIPA1L3	16.9979	16.7375	8.61551	7.7864	290.778	-0.911628	0.135627	-6.72158	1.8e-11	2.26e-10
ENST00000222374	CADM4	6.49569	6.53273	6.18864	6.04435	149.025	-0.066849	0.18557	-0.360237	0.71867	0.960728	CADM4	10.9413	11.5695	1.73833	3.05108	34.7021	-2.15976	0.44541	-4.84892	1.24e-06	9.74e-06
ENST00000222402	UBE2D4	4.59694	4.51465	4.64154	4.03473	190.9	-0.0466	0.166315	-0.280191	0.779331	0.968264	UBE2D4	8.99508	9.54284	8.60295	7.47796	16.4492	-0.0530073	0.554201	-0.0956464	0.923801	0.963507
ENST00000222482	CPA4	2.34319	1.96233	3.5005	2.86045	80.3514	0.587055	0.257327	2.28136	0.0225272	0.182228	CPA4	1.32244	2.33244	1.80233	1.20511	9.05359	-0.128692	0.774048	-0.166259	0.867953	0.934128
ENST00000222511	GTPBP10	5.5123	5.69651	5.46619	6.13514	463.143	0.0737064	0.10778	0.683862	0.494062	0.883275	GTPBP10	24.6365	22.4738	32.0243	22.2867	130.855	0.397243	0.20656	1.92314	0.0544624	0.139987
ENST00000222547	BET1	20.0848	20.6909	22.1233	20.2076	331.839	0.0780377	0.125615	0.621246	0.534438	0.89973	BET1	137.418	114.72	114.317	133.287	196.991	0.0546857	0.166201	0.329034	0.74213	0.860445
ENST00000222553	NAMPT	144.713	146.544	146.009	146.41	6860.19	0.0297837	0.0266539	1.11743	0.263812	0.732415	NAMPT	261.649	255.703	290.531	295.352	1785.31	0.318747	0.0556479	5.72793	1.02e-08	1.03e-07
ENST00000222567	TWISTNB	15.5755	16.6873	15.5648	16.0224	670.001	-0.00648379	0.0886189	-0.0731649	0.941675	0.990865	TWISTNB	37.6793	35.6925	31.6782	40.2778	159.672	0.137635	0.180582	0.762173	0.445957	0.639241
ENST00000222573	ITGB8	0.874192	0.883259	0.725532	0.936113	82.6934	-0.0568161	0.252054	-0.225413	0.821658	0.972658	ITGB8	2.53397	2.28023	2.52159	2.52906	25.1499	0.22485	0.444467	0.505886	0.612936	0.771871
ENST00000222574	HBP1	16.1765	14.3881	17.2307	16.8592	494.163	0.181505	0.104811	1.73174	0.0833198	0.42477	HBP1	47.2532	46.2596	37.8898	42.1147	293.102	-0.0917156	0.132394	-0.69275	0.488467	0.676609
ENST00000222584	SP4	3.56351	4.00709	3.35246	3.83608	241.728	-0.0506469	0.150397	-0.336755	0.736302	0.961608	SP4	5.4148	4.92053	3.33364	4.20635	47.1888	-0.240608	0.329573	-0.73006	0.465353	0.656337
ENST00000222644	MPP6	5.09534	4.83407	4.78357	5.10631	451.558	0.0182807	0.107817	0.169552	0.865362	0.979578	MPP6	14.5631	15.3269	15.1444	17.3815	112.981	0.252967	0.21099	1.19895	0.230546	0.413648
ENST00000222693	CAV2	71.1753	70.5634	67.2835	68.2395	2206.7	-0.0406571	0.0476386	-0.853448	0.393411	0.835703	CAV2	289.973	267.571	289.357	265.158	591.291	0.131479	0.097413	1.3497	0.177111	0.343708
ENST00000222725	LFNG	4.71261	4.94636	3.65083	3.8224	112.798	-0.346092	0.214334	-1.61473	0.106369	0.482512	LFNG	7.52859	9.25328	2.44696	2.67731	26.4007	-1.57527	0.475769	-3.31099	0.000929657	0.00438262
ENST00000222726	HOXA5	1.6148	1.5658	1.82361	1.44622	29.0418	0.0639381	0.415623	0.153837	0.877738	0.981012	HOXA5	2.57754	2.07822	2.49804	3.13179	9.12995	0.586335	0.762871	0.76859	0.442136	0.635677
ENST00000222800	ABHD11	7.93493	10.1937	8.14344	8.42617	138.66	-0.105659	0.20047	-0.527057	0.598154	0.924482	ABHD11	16.5699	17.5906	22.2147	24.428	85.4897	0.587911	0.243424	2.41517	0.0157277	0.0508484
ENST00000222803	FKBP14	5.6471	4.89175	6.0545	5.82209	300.949	0.19642	0.134232	1.46329	0.143388	0.561891	FKBP14	23.7476	25.2637	12.7862	12.0225	50.7491	-0.771905	0.321637	-2.39993	0.0163982	0.0525906
ENST00000222812	STX1A	7.89196	7.50287	6.44478	7.29365	165.002	-0.14019	0.178559	-0.785118	0.432385	0.854374	STX1A	13.0488	16.3173	13.7587	11.157	51.3658	-0.131877	0.319176	-0.413179	0.679476	0.818794
ENST00000222823	NOD1	2.75844	2.75832	2.61196	2.79836	132.63	-0.00406246	0.196814	-0.0206411	0.983532	0.997793	NOD1	0.657232	0.80959	1.68087	1.2422	14.2417	1.00927	0.613361	1.64548	0.0998706	0.22427
ENST00000222982	CYP3A5	1.99546	1.56779	1.64849	1.46523	30.9415	-0.170552	0.405374	-0.420728	0.673954	0.949295	CYP3A5	1.38633	2.51498	0.335892	1.34754	8.76531	-0.81636	0.823993	-0.990737	0.321814	0.521171
ENST00000222990	SNX8	7.71325	7.95611	6.13926	6.18354	354.602	-0.322573	0.121065	-2.66447	0.00771093	0.0815969	SNX8	37.1166	33.7878	32.817	24.9129	198.197	-0.165868	0.170473	-0.972991	0.330558	0.529256
ENST00000223023	WASL	12.9424	13.2977	13.0697	12.4672	608.895	-0.0151495	0.0921364	-0.164424	0.869397	0.979829	WASL	32.9364	35.4172	34.2244	30.4745	221.21	0.033306	0.150702	0.221005	0.825088	0.908462
ENST00000223029	AIMP2	50.2727	51.5665	52.7704	49.2611	658.392	0.0267585	0.0891021	0.300313	0.763939	0.966732	AIMP2	106.565	97.5383	113.554	108.605	442.832	0.207536	0.109319	1.89845	0.0576367	0.146384
ENST00000223061	PCOLCE	0.970275	0.970233	0.900524	1.2468	16.7129	0.170166	0.553094	0.307663	0.758339	0.965726	PCOLCE	1.08498	1.0935	2.25325	0.564978	7.61637	0.616791	0.865558	0.712594	0.476097	0.665761
ENST00000223073	RBM28	8.31047	8.08351	7.66601	8.04476	1341.82	-0.0373743	0.0621986	-0.600886	0.547916	0.904313	RBM28	27.2323	25.5978	27.6587	30.0801	272.87	0.25624	0.135586	1.88986	0.0587761	0.148639
ENST00000223095	SERPINE1	106.11	105.821	112.202	112.029	3711.57	0.105433	0.0363932	2.89705	0.00376691	0.0463591	SERPINE1	367.876	347.559	76.7589	74.6722	1109.14	-2.09143	0.081006	-25.8182	5.53e-147	1.46e-144
ENST00000223127	PLOD3	14.5709	14.4834	12.4335	13.0656	414.63	-0.164263	0.111755	-1.46985	0.141603	0.558439	PLOD3	19.5201	17.8676	21.8198	21.9989	196.853	0.362709	0.158615	2.28673	0.0222117	0.0678286
ENST00000223129	RPA3	28.1161	25.6877	24.5381	26.668	571.699	-0.047359	0.0980628	-0.482946	0.629134	0.933964	RPA3	498.658	541.41	583.195	571.643	877.907	0.286863	0.0805259	3.56237	0.000367524	0.00192025
ENST00000223136	FIS1	54.4792	51.7529	53.7145	52.625	498.538	0.0254879	0.101915	0.250091	0.802517	0.96851	FIS1	126.367	137.05	146.986	151.315	285.923	0.311307	0.132769	2.34473	0.0190409	0.0599028
ENST00000223145	GLCCI1	0.689464	0.586019	0.57591	0.708769	32.7212	0.034395	0.392651	0.0875967	0.930197	0.988026	GLCCI1	0.763366	2.05162	0.15413	0.618343	6.3903	-1.77734	1.05006	-1.69261	0.0905304	0.208086
ENST00000223208	CEP41	5.19509	4.33771	4.68995	5.20703	329.612	0.0781112	0.132603	0.589063	0.555819	0.907223	CEP41	20.8967	18.0521	13.5618	13.6019	81.2088	-0.366938	0.251141	-1.46108	0.143993	0.295553
ENST00000223210	ZNF862	0.988818	1.13003	0.710991	0.83196	68.4349	-0.433521	0.276279	-1.56914	0.116615	0.509437	ZNF862	0.535793	0.719999	0.721206	0.217002	8.75937	-0.228274	0.811127	-0.281428	0.778382	0.882205
ENST00000223215	MEST	29.7412	30.5428	33.0603	33.1376	902.521	0.159051	0.075007	2.12048	0.0339652	0.244154	MEST	27.2142	29.3122	11.5767	10.3489	85.1535	-1.28327	0.258182	-4.97039	6.68e-07	5.44e-06
ENST00000223273	YAE1	14.8238	15.4799	14.7093	14.5879	139.92	-0.0246911	0.191518	-0.128923	0.897419	0.983978	YAE1D1	41.2634	39.4149	32.8283	31.8029	107.153	-0.21467	0.216838	-0.990001	0.322173	0.521472
ENST00000223321	PSMA2	124.516	119.61	132.038	123.315	1931.16	0.0888999	0.0533256	1.66711	0.0954917	0.457088	PSMA2	605.821	596.789	752.295	744.403	2086.07	0.46589	0.0510101	9.13329	6.64e-20	1.37e-18
ENST00000223324	MRPL32	63.4533	61.548	65.8941	66.1346	595.316	0.102943	0.0927104	1.11037	0.266839	0.734626	MRPL32	164.729	163.411	157.855	132.685	383.37	-0.033841	0.118689	-0.285123	0.77555	0.880268
ENST00000223369	YKT6	38.984	37.4762	38.8635	39.2406	1153	0.054724	0.0666161	0.821484	0.411371	0.845565	YKT6	186.286	186.685	149.031	153.743	440.594	-0.16984	0.107783	-1.57576	0.11508	0.250304
ENST00000223398	CLIP2	3.99656	3.40056	3.39902	2.9693	208.527	-0.192043	0.163643	-1.17355	0.240574	0.708818	CLIP2	5.98797	6.70554	4.67487	5.33543	78.5106	-0.257428	0.254897	-1.00993	0.312528	0.512105
ENST00000223459	ZNF688	2.15221	2.41298	1.34097	2.05324	53.7033	-0.403517	0.317807	-1.26969	0.204195	0.659179	ZNF688	3.27796	3.55782	6.41481	4.28919	15.889	0.79901	0.574481	1.39084	0.164274	0.324645
ENST00000223500	CHMP5	54.3789	56.1389	57.7278	56.8405	1153.63	0.0759711	0.0664068	1.14403	0.252613	0.720212	CHMP5	244.372	250.774	302.203	308.503	805.16	0.439504	0.0817581	5.37567	7.63e-08	6.97e-07
ENST00000223528	FKTN	6.85798	6.89097	7.3442	7.52913	568.37	0.137446	0.0947883	1.45003	0.14705	0.570612	FKTN	9.9635	12.4761	7.49819	5.68614	53.8512	-0.575508	0.317137	-1.8147	0.0695703	0.1697
ENST00000223641	SEC61B	123.737	129.817	126.428	121.207	761.915	-0.0100426	0.0826986	-0.121436	0.903345	0.984803	SEC61B	732.182	757.657	769.319	740.767	951.342	0.17426	0.0755431	2.30676	0.021068	0.0649929
ENST00000223642	C5	4.9803	4.98008	4.61266	4.88143	286.494	-0.0451276	0.134243	-0.336163	0.736748	0.961608	C5	11.6681	11.676	3.52126	3.78394	165.313	-1.56236	0.187959	-8.31225	9.39e-17	1.65e-15
ENST00000223836	AK1	24.7599	24.2037	20.6891	25.2534	188.248	-0.0678312	0.169886	-0.399275	0.689691	0.953837	AK1	51.3667	50.0999	58.6148	57.1776	155.306	0.341324	0.178467	1.91253	0.0558086	0.142641
ENST00000223864	PLGRKT	22.1582	24.0731	21.5168	22.1578	237.697	-0.0580244	0.148184	-0.39157	0.695376	0.956201	PLGRKT	47.3426	45.8056	54.4854	52.9209	96.8128	0.365252	0.226814	1.61036	0.107319	0.237467
ENST00000224073	EDF1	218.493	203.053	188.614	185.906	1419.93	-0.146618	0.0618224	-2.3716	0.0177113	0.151945	EDF1	491.857	491.453	481.928	474.784	956.324	0.0937332	0.0749447	1.2507	0.211045	0.388678
ENST00000224140	SETX	21.4511	21.4501	21.9092	22.0403	2599.27	0.0588697	0.043694	1.34732	0.177878	0.62542	SETX	7.3831	8.20089	6.73968	6.09629	247.681	-0.137602	0.144004	-0.955541	0.339304	0.537756
ENST00000224356	CYP26A1	1.19664	1.85278	1.09132	0.99205	29.2446	-0.525521	0.429228	-1.22434	0.220824	0.681942	CYP26A1	0.980191	1.69352	1.01781	1.53124	8.41195	0.0835299	0.801456	0.104223	0.916993	0.959398
ENST00000224652	ATE1	13.5424	14.354	14.783	13.8875	751.845	0.0635298	0.0840117	0.756202	0.449528	0.862835	ATE1	38.0212	36.1532	28.32	32.1583	229.429	-0.150731	0.149528	-1.00805	0.31343	0.513093
ENST00000224721	CDH23	0.102717	0.132059	0.113142	0.0848515	12.9842	-0.221778	0.634619	-0.349466	0.726739	0.961423	CDH23	0.0622483	0.209123	0.0251368	0.0504224	3.66308	-1.69206	1.39667	-1.21149	0.225707	0.408216
ENST00000224807	SFXN3	13.0686	12.6184	16.0123	15.1275	473.576	0.30175	0.104745	2.8808	0.00396672	0.0483696	SFXN3	29.9788	35.8253	39.6901	38.5066	154.691	0.387418	0.180156	2.15046	0.0315191	0.0903494
ENST00000224862	FBXL15	2.5256	2.69847	1.37827	1.51155	51.539	-0.830143	0.319748	-2.59624	0.00942506	0.0959473	FBXL15	5.79946	6.07879	6.46369	7.61026	26.5961	0.370753	0.433247	0.855754	0.392134	0.590728
ENST00000224950	STN1.00	3.54127	3.77206	4.20455	4.31971	272.086	0.245093	0.137867	1.77776	0.0754436	0.400963	OBFC1	15.6964	17.9162	22.6809	21.5992	94.2474	0.509943	0.232297	2.19522	0.0281477	0.0826943
ENST00000225174	PPIF	42.3479	45.0624	48.1079	46.527	1078.01	0.138613	0.0698868	1.9834	0.0473232	0.304966	PPIF	118.006	120.966	154.363	152.369	373.457	0.497219	0.116254	4.27699	1.89e-05	0.000125571
ENST00000225235	TBC1D12	3.59522	3.78351	3.70729	3.6698	224.223	0.0237226	0.151594	0.156488	0.875648	0.980887	TBC1D12	2.51435	1.71956	2.06693	2.40037	22.4162	0.233225	0.480807	0.485071	0.627626	0.782102
ENST00000225296	DHX33	11.073	10.2458	10.2074	9.54278	612.584	-0.086234	0.0938672	-0.918681	0.358262	0.807951	DHX33	23.4275	26.0916	21.7033	20.0931	212.206	-0.0937508	0.154435	-0.607056	0.543813	0.719106
ENST00000225298	UTP18	57.4558	56.6692	54.5227	54.9112	1130.37	-0.0365187	0.0668421	-0.546343	0.58483	0.91886	UTP18	65.5882	66.1031	70.6618	68.1334	497.261	0.203839	0.101644	2.00542	0.0449181	0.120792
ENST00000225388	NUFIP2	28.9701	28.9162	33.8786	32.9401	3658.66	0.231065	0.0370662	6.23386	4.55e-10	2.49e-08	NUFIP2	41.7561	42.6895	37.2415	29.93	345.462	-0.178795	0.127085	-1.40689	0.15946	0.318726
ENST00000225430	RPL19	1893.39	1897.96	1990.58	1989.6	15443.1	0.0941604	0.0173946	5.41319	6.19e-08	2.64e-06	RPL19	3195.62	3212.48	4043.82	4076.49	9468.61	0.484303	0.0236559	20.4728	3.76e-93	4.48e-91
ENST00000225504	SUPT4H1	57.2251	58.7602	61.6116	64.1483	970.014	0.140774	0.0727594	1.93479	0.0530162	0.327283	SUPT4H1	339.045	373.48	324.986	310.77	519.711	-0.0387648	0.101077	-0.383518	0.701335	0.835438
ENST00000225512	WNT3	4.59932	4.62398	4.05747	4.60031	158.399	-0.067239	0.181666	-0.370125	0.71129	0.959656	WNT3	3.92076	0.790309	1.42494	0.714578	7.45026	-1.15806	0.940081	-1.23187	0.217998	0.397699
ENST00000225519	SHPK	10.3551	9.75059	10.7565	10.0074	417.389	0.070505	0.112367	0.627454	0.530362	0.898918	SHPK	19.5095	18.1953	11.8174	17.5131	104.515	-0.210084	0.230284	-0.912282	0.36162	0.559664
ENST00000225525	TAX1BP3	131.963	129.723	112.399	115.263	1687.52	-0.176904	0.0549142	-3.22147	0.00127535	0.0193151	TAX1BP3	546.646	556.594	380.07	381.195	762.081	-0.389532	0.0850016	-4.58264	4.59e-06	3.36e-05
ENST00000225576	TVP23C	4.97698	5.45838	3.92001	4.46991	77.4206	-0.290693	0.258228	-1.12572	0.260283	0.728438	TVP23C	1.76505	2.03304	0.305467	0.306371	3.79924	-2.48207	1.46118	-1.69868	0.0893789	0.206051
ENST00000225577	RPS6KB1	22.4169	22.0848	21.4944	23.2922	1306.53	0.0332486	0.0640772	0.518883	0.603842	0.925546	RPS6KB1	37.1166	36.2055	31.6359	33.6623	241.947	-0.0652634	0.143225	-0.455669	0.648628	0.796812
ENST00000225609	PIGL	7.10046	6.78318	7.9026	8.6353	105.785	0.276428	0.220046	1.25623	0.209033	0.666052	PIGL	22.3694	18.6483	14.0515	10.7376	54.7615	-0.584252	0.312766	-1.86802	0.0617595	0.154288
ENST00000225655	PFN1	1562.17	1551.37	1499.49	1472.2	13235.4	-0.04324	0.0192312	-2.24844	0.0245484	0.193747	PFN1	6609.4	6577.62	5869.11	5954.72	11691.1	-0.01914	0.021332	-0.897245	0.369588	0.567041
ENST00000225665	SLC25A11	56.0247	52.8347	59.2726	56.0418	1022.73	0.107133	0.0722042	1.48375	0.137875	0.550605	SLC25A11	109.931	122.633	114.649	105.025	469.042	0.0734954	0.107243	0.685316	0.493144	0.679974
ENST00000225698	C1QBP	355.885	356.848	374.424	371.078	4596.15	0.0888872	0.0326483	2.72257	0.00647759	0.0708569	C1QBP	685.077	672.05	786.584	808.103	2760.82	0.367978	0.0446765	8.23649	1.77e-16	3.06e-15
ENST00000225719	CPD	34.7034	34.7978	33.2009	33.367	3437.04	-0.0381732	0.0379094	-1.00696	0.313954	0.778123	CPD	49.3711	46.7091	7.63668	7.23036	489.443	-2.54695	0.126296	-20.1665	1.93e-90	2.17e-88
ENST00000225726	CCDC47	57.9225	58.1937	56.202	52.8081	1991.83	-0.0670727	0.051496	-1.30249	0.19275	0.647914	CCDC47	114.548	114.576	40.1471	43.067	485.509	-1.33883	0.10946	-12.2312	2.12e-34	7.37e-33
ENST00000225728	MED31	7.67524	8.37718	8.1227	8.83129	144.973	0.102888	0.189471	0.543027	0.587111	0.920016	MED31	105.718	102.8	128.072	109.087	191.234	0.326702	0.16302	2.00405	0.0450643	0.12108
ENST00000225729	DRG2	26.6661	26.0198	25.8668	26.4179	537.626	0.0130089	0.0976677	0.133196	0.894039	0.983379	DRG2	58.8868	58.7711	76.4339	66.6711	315.956	0.42494	0.128903	3.29659	0.000978661	0.00458398
ENST00000225737	AKAP10	16.7943	15.6069	15.1978	16.6701	703.872	9.09e-05	0.0885069	0.00102743	0.99918	0.999941	AKAP10	18.3971	18.4356	11.4619	12.0068	130.393	-0.503748	0.197488	-2.55077	0.0107484	0.0371545
ENST00000225792	DDX5	161.729	164.739	175.737	178.777	6765.12	0.142941	0.027172	5.26061	1.44e-07	5.77e-06	DDX5	314.758	328.652	390.375	386.022	2889.57	0.391638	0.0442939	8.84181	9.42e-19	1.82e-17
ENST00000225805	C17orf75	7.24248	7.86649	8.06925	8.04584	385.687	0.117055	0.116475	1.00498	0.314905	0.778961	C17orf75	29.7003	31.8818	29.3804	31.8162	162.615	0.103135	0.175015	0.589291	0.555666	0.729253
ENST00000225823	ASIC2	0.854451	0.664544	0.884529	0.884475	30.5367	0.243828	0.406003	0.600558	0.548135	0.904364	ASIC2	0.247224	0	0.748747	0.450578	3.02174	2.59628	1.63711	1.58589	0.112764	0.246608
ENST00000225831	CCL2	28.7835	27.6795	31.3202	33.1606	241.721	0.215601	0.146203	1.47467	0.140302	0.556054	CCL2	382.413	375.496	228.23	212.677	384.619	-0.637129	0.117137	-5.43918	5.35e-08	4.97e-07
ENST00000225916	KAT2A	22.7711	23.7669	23.9023	24.7436	799.414	0.087954	0.0804164	1.09373	0.274073	0.743125	KAT2A	21.6181	21.2012	23.1673	25.5595	254.503	0.34003	0.14095	2.41241	0.0158473	0.0511414
ENST00000225927	NAGLU	14.6268	14.6262	13.8323	12.9829	373.942	-0.101504	0.117784	-0.861777	0.38881	0.831998	NAGLU	28.4743	28.7923	8.05644	8.08028	175.622	-1.71753	0.185024	-9.28275	1.65e-20	3.53e-19
ENST00000225964	COL1A1	1.09331	0.789577	0.764937	0.65562	59.8359	-0.382504	0.301676	-1.26793	0.204822	0.65979	COL1A1	1.61624	1.72475	1.32453	1.03965	27.3583	-0.332455	0.430248	-0.772705	0.439697	0.633346
ENST00000225969	MRPL27	96.6092	102.442	103.178	103.019	749.51	0.0749274	0.0832163	0.900393	0.367911	0.815467	MRPL27	268.97	271.081	311.601	301.097	567.918	0.333421	0.0957978	3.48047	0.000500539	0.00252697
ENST00000225972	LRRC59	136.425	138.263	142.171	145.517	4366.91	0.0907532	0.0338887	2.67798	0.00740687	0.0790579	LRRC59	341.394	334.707	336.961	318.127	1363.39	0.0963927	0.0642023	1.50139	0.133255	0.280335
ENST00000225983	HDAC5	1.71846	1.94852	1.71541	1.63644	100.733	-0.105579	0.226664	-0.465794	0.641363	0.937899	HDAC5	3.03658	4.05974	2.77777	1.80713	42.5102	-0.502971	0.360558	-1.39498	0.163022	0.323189
ENST00000226004	DUSP3	37.2174	36.7369	35.9025	37.4133	1625.64	0.0115289	0.0561229	0.205422	0.837243	0.97552	DUSP3	212.166	177.056	127.603	127.066	390.459	-0.473152	0.122535	-3.86137	0.000112754	0.000649121
ENST00000226105	RANGRF	20.3559	21.0434	18.9558	19.3337	178.454	-0.0886158	0.169875	-0.521652	0.601913	0.925203	RANGRF	49.7631	47.5141	35.8086	57.2815	115.417	0.0716647	0.328248	0.218324	0.827176	0.909872
ENST00000226218	VTN	1.05541	0.75383	1.03336	0.904132	16.4277	0.122794	0.559602	0.21943	0.826315	0.973579	VTN	14.9961	18.342	4.40946	3.18421	63.3861	-1.9986	0.325442	-6.14121	8.19e-10	9.02e-09
ENST00000226225	TNFAIP1	25.4999	24.1941	28.1216	29.1788	1030.29	0.22951	0.071203	3.22331	0.00126718	0.0192386	TNFAIP1	67.8317	58.5979	48.0241	49.2365	231.234	-0.244857	0.150106	-1.63122	0.102843	0.229737
ENST00000226230	TMEM97	44.0279	44.9218	49.4163	48.1342	1238.74	0.157199	0.0639715	2.45732	0.0139977	0.128015	TMEM97	198.895	201.652	105.386	108.1	353.016	-0.732222	0.121558	-6.02365	1.71e-09	1.83e-08
ENST00000226279	CD38	4.5367	4.88546	4.07353	4.68988	275.425	-0.0805075	0.140284	-0.573891	0.566041	0.912455	CD38	24.5897	25.4842	6.46369	8.17398	62.9716	-1.64139	0.309514	-5.30311	1.14e-07	1.02e-06
ENST00000226299	LAP3	20.4574	21.3796	23.1574	22.0646	519.523	0.136285	0.0999648	1.36333	0.172777	0.616647	LAP3	40.0934	41.7596	59.13	53.6025	336.541	0.61464	0.123853	4.96264	6.95e-07	5.63e-06
ENST00000226319	JADE1	20.6342	20.5902	19.9704	19.4713	1238.16	-0.0397418	0.0639122	-0.621819	0.534061	0.899658	JADE1	15.6214	15.0776	8.41087	8.43576	131.004	-0.674411	0.19828	-3.40131	0.000670646	0.00328275
ENST00000226574	NFKB1	9.33065	9.35039	9.50443	8.36443	399.453	-0.0400974	0.116007	-0.345647	0.729608	0.961608	NFKB1	18.4577	20.4122	20.0984	18.7617	247.255	0.102917	0.143574	0.716819	0.473486	0.663727
ENST00000226796	GAR1	11.6741	11.6736	8.79435	8.69036	111.589	-0.393149	0.215312	-1.82595	0.0678573	0.376994	GAR1	49.7097	52.0393	53.6158	57.6712	154.24	0.298751	0.179363	1.66562	0.0957883	0.217517
ENST00000226798	FRG1	48.4631	54.7274	48.4271	44.3441	516.397	-0.129512	0.104716	-1.2368	0.216161	0.676009	FRG1	50.1721	56.0032	59.4737	67.5156	130.283	0.452571	0.205248	2.205	0.0274542	0.0809449
ENST00000227155	CD82	1.66245	1.5885	1.85153	1.32922	38.3477	-0.00748264	0.365178	-0.0204904	0.983652	0.997793	CD82	11.2079	11.0332	23.0508	29.4529	66.1377	1.39098	0.29007	4.79531	1.62e-06	1.26e-05
ENST00000227266	CTSC	66.1616	67.8629	68.7932	60.9274	1329.34	-0.0230562	0.0663288	-0.347605	0.728137	0.961425	CTSC	112.733	110.739	53.1711	56.2505	496.125	-0.908312	0.105499	-8.60965	7.33e-18	1.35e-16
ENST00000227322	ZPR1	9.51032	8.7726	11.0331	10.0368	694.088	0.228703	0.0894321	2.55728	0.0105495	0.104293	ZPR1	40.9374	43.8565	40.4095	48.4507	262.391	0.197646	0.140105	1.4107	0.158332	0.317254
ENST00000227349	JHY	0.62531	0.914765	0.535714	0.714242	53.0292	-0.277014	0.324102	-0.854713	0.39271	0.835398	C11orf63	2.32575	2.07354	1.30039	1.41293	18.3049	-0.717708	0.535476	-1.34032	0.180142	0.347575
ENST00000227451	DTX4	2.38227	2.34133	2.53659	2.34402	155.439	0.0712045	0.182159	0.390893	0.695877	0.956201	DTX4	1.91129	2.60617	2.99644	1.91247	18.9727	0.272232	0.525332	0.51821	0.604312	0.765242
ENST00000227471	UNC93B1	22.4424	23.795	16.3886	15.7009	483.636	-0.502916	0.105118	-4.7843	1.72e-06	5.54e-05	UNC93B1	55.4883	56.0414	16.2404	15.8636	273.514	-1.65162	0.147345	-11.2092	3.67e-29	1.1e-27
ENST00000227474	PUS3	4.02115	3.61888	4.47849	3.61702	77.6017	0.107555	0.25899	0.415287	0.677932	0.949746	PUS3	3.32776	3.20806	4.9078	5.62551	27.9022	0.770934	0.425521	1.81174	0.0700264	0.170611
ENST00000227507	CCND1	70.13	70.0498	67.2264	64.5958	3106.65	-0.0646499	0.0406368	-1.59092	0.111628	0.497337	CCND1	258.322	258.923	204.914	209.246	904.263	-0.167333	0.077435	-2.16095	0.0306994	0.0884923
ENST00000227520	CCDC86	24.8556	25.2518	19.1761	20.9336	449.745	-0.297023	0.108503	-2.73746	0.00619156	0.0684624	CCDC86	63.9874	58.8396	80.7961	79.391	331.235	0.511029	0.123401	4.14122	3.45e-05	0.000217695
ENST00000227524	PRPF19	28.2886	27.3782	26.2425	25.1176	674.027	-0.0921405	0.0876903	-1.05075	0.293374	0.760979	PRPF19	167.77	172.566	190.699	194.115	1206.68	0.3364	0.0669789	5.02248	5.1e-07	4.22e-06
ENST00000227525	TMEM109	34.9675	33.5458	35.712	36.9429	810.385	0.10871	0.0798464	1.36149	0.173359	0.617856	TMEM109	126.872	129.6	75.6352	59.1561	309.42	-0.773954	0.136318	-5.67757	1.37e-08	1.36e-07
ENST00000227638	PANX1	8.96843	7.99387	8.68987	8.54207	262.909	0.0467752	0.141871	0.329702	0.741625	0.961733	PANX1	13.886	13.0072	13.4578	14.2916	76.3068	0.12436	0.256152	0.485491	0.627328	0.781967
ENST00000227756	GALNT18	6.17053	7.24761	6.20943	6.75444	177.981	-0.0256232	0.174261	-0.147039	0.883101	0.981632	GALNT18	10.3186	10.5152	10.0004	9.19416	78.8859	0.025665	0.252211	0.10176	0.918947	0.9606
ENST00000227868	PDHX	34.3219	33.0456	33.0167	32.8467	897.793	-0.00854341	0.0755474	-0.113087	0.909962	0.985435	PDHX	37.7833	34.7199	32.4783	35.4436	231.276	0.0721142	0.147945	0.48744	0.625947	0.781146
ENST00000228027	DGAT2	1.45987	2.00299	2.13782	2.26857	51.11	0.371712	0.318787	1.16602	0.243606	0.711686	DGAT2	1.43492	2.53082	0.869164	0.653802	6.96327	-1.29243	0.938309	-1.3774	0.168387	0.330872
ENST00000228136	C11orf58	47.4261	47.7992	46.2387	44.3339	1962.94	-0.0482323	0.0510945	-0.943982	0.345179	0.800145	C11orf58	449.886	446.519	513.225	515.206	1160.3	0.344692	0.0681161	5.06036	4.18e-07	3.51e-06
ENST00000228251	YBX3	45.1125	46.4223	43.8333	42.9061	927.776	-0.053593	0.0742292	-0.721993	0.470299	0.871085	YBX3	136.194	144.805	149.58	144.113	703.752	0.210288	0.0880617	2.38797	0.0169419	0.0541572
ENST00000228284	SART3	27.5558	25.9662	27.7564	25.9403	1070.58	0.0287261	0.0711161	0.403933	0.686262	0.952301	SART3	29.9373	27.1694	23.2043	25.2555	342.749	-0.122806	0.124996	-0.982473	0.325867	0.52529
ENST00000228318	SLC25A3	300.09	296.473	300.588	301.133	5420.49	0.0364566	0.0300795	1.21201	0.225509	0.688128	SLC25A3	747.842	776.383	955.346	953.268	4121.66	0.468264	0.0370201	12.6489	1.13e-36	4.36e-35
ENST00000228347	POLR3B	4.86444	5.11818	5.27209	5.27176	231.511	0.102954	0.149096	0.690521	0.489867	0.882574	POLR3B	5.77387	5.8192	5.20885	5.22426	81.3194	-0.040951	0.247977	-0.16514	0.868834	0.934373
ENST00000228437	PRDM4	10.8841	10.7664	10.7225	12.6301	507.502	0.133232	0.105763	1.25972	0.207769	0.664085	PRDM4	8.68833	7.88089	9.47291	7.07293	86.493	0.134593	0.248668	0.541256	0.588331	0.755163
ENST00000228438	CLEC2B	1.24982	0.62488	0.741282	1.05009	16.7983	-0.0416234	0.573264	-0.0726078	0.942118	0.990993	CLEC2B	27.0901	38.1297	23.1991	19.8627	52.6457	-0.487589	0.323199	-1.50863	0.131393	0.27736
ENST00000228468	ASIC1	1.48507	1.20405	1.34105	1.18625	57.2459	-0.0655337	0.299827	-0.218572	0.826984	0.973579	ASIC1	5.45594	4.64341	2.49695	1.62046	26.1069	-1.15983	0.465002	-2.49425	0.0126225	0.0426104
ENST00000228495	KCTD10	11.2989	10.673	10.18	10.3937	449.464	-0.0708228	0.107583	-0.658306	0.510342	0.892001	KCTD10	57.3647	60.28	56.8345	60.7848	243.469	0.177117	0.142347	1.24426	0.213403	0.391814
ENST00000228506	MLEC	69.6819	71.2253	69.6401	71.1097	4814.45	0.0224288	0.0324263	0.691686	0.489135	0.881798	MLEC	135.612	146.045	43.5981	43.4375	347.668	-1.54315	0.132174	-11.6751	1.71e-31	5.47e-30
ENST00000228515	CSRNP2	4.08865	3.69048	3.58032	4.13804	188.701	0.0127194	0.168886	0.0753137	0.939965	0.990719	CSRNP2	6.79274	5.03767	5.90007	4.67174	40.5738	-0.0152294	0.360726	-0.0422188	0.966324	0.983552
ENST00000228606	CYP27B1	0.620125	0.688998	0.531273	0.75259	16.5788	-0.00403581	0.556739	-0.00724901	0.994216	0.99897	CYP27B1	1.09596	0.828424	1.82559	1.66454	9.06079	1.01033	0.771144	1.31017	0.190137	0.360685
ENST00000228682	GLI1	1.87221	1.93384	1.79784	1.87704	80.0888	-0.026553	0.251111	-0.105742	0.915787	0.986019	GLI1	2.95741	4.81974	1.90572	2.21717	43.5949	-0.683434	0.360134	-1.89772	0.0577329	0.146508
ENST00000228705	PPM1H	5.95101	5.36833	5.158	5.56444	383.401	-0.0541269	0.118848	-0.455428	0.648801	0.941096	PPM1H	10.4255	8.46045	5.74088	5.92238	50.2482	-0.574604	0.32189	-1.78509	0.0742463	0.178609
ENST00000228740	LTA4H	72.4013	70.7561	70.8605	76.4501	1675.86	0.0652995	0.0568899	1.14782	0.251042	0.718563	LTA4H	123.469	117.321	143.229	150.572	1078.67	0.414448	0.0724453	5.72083	1.06e-08	1.07e-07
ENST00000228741	ELK3	15.4451	16.9421	16.6234	16.3474	740.205	0.0498161	0.0852703	0.584214	0.559076	0.908236	ELK3	31.4624	34.8114	18.6433	15.3743	132.926	-0.829535	0.20244	-4.09769	4.17e-05	0.00025927
ENST00000228799	ITFG2	6.72771	6.58652	5.79393	7.46828	166.209	0.0184042	0.182931	0.100607	0.919862	0.986063	ITFG2	6.85037	7.5318	11.128	8.32342	50.6774	0.569123	0.31992	1.77895	0.0752474	0.180492
ENST00000228820	PARP11	0.330622	0.385709	0.448479	0.660876	21.9352	0.655105	0.487515	1.34376	0.179025	0.627238	PARP11	4.94155	3.32023	4.24039	3.00207	17.3012	-0.193384	0.551231	-0.350821	0.725722	0.849522
ENST00000228825	ARPC3	249.043	244.714	238.115	232.44	2458.63	-0.0454043	0.0453784	-1.00057	0.317033	0.78143	ARPC3	1209.29	1222.33	1512.35	1513.03	3226.11	0.461137	0.0408722	11.2824	1.6e-29	4.88e-28
ENST00000228843	RAD51AP1	14.9232	15.1114	14.2739	14.807	344.644	-0.0225144	0.122161	-0.184301	0.853777	0.978827	RAD51AP1	33.4128	28.6936	35.9271	40.5976	160.721	0.45256	0.179944	2.515	0.0119033	0.0404933
ENST00000228865	CREBL2	12.7238	12.9184	12.7299	14.2332	534.73	0.0965174	0.100255	0.962721	0.335688	0.794688	CREBL2	27.8374	37.4079	19.6721	24.6629	43.5349	-0.363809	0.350013	-1.03941	0.298612	0.496445
ENST00000228918	LTBR	52.2709	51.6176	48.0785	51.4217	1169.81	-0.0382237	0.0669656	-0.570796	0.568138	0.913169	LTBR	139.187	141.086	59.5008	63.759	568.615	-1.04712	0.100085	-10.4623	1.29e-25	3.37e-24
ENST00000228922	OGFOD2	6.51914	6.1975	5.19175	3.89357	104.468	-0.461095	0.22926	-2.01123	0.0443009	0.290965	OGFOD2	20.4804	15.8316	14.453	16.4285	77.2094	-0.0833399	0.264164	-0.315485	0.752393	0.86606
ENST00000228928	OAS3	15.0088	15.3177	16.057	16.2788	1114.99	0.116592	0.0673328	1.73158	0.0833484	0.42477	OAS3	29.4508	30.1982	29.5508	30.6495	429.219	0.162333	0.108925	1.49032	0.136141	0.28414
ENST00000229179	NUP107	24.2407	23.9372	23.6465	24.9803	1621.39	0.0374213	0.05664	0.660688	0.508813	0.890874	NUP107	54.6215	54.8229	49.127	53.0204	641.254	0.0421148	0.0918017	0.458758	0.646408	0.795189
ENST00000229195	CNOT2	21.6622	22.0098	21.9181	22.0447	775.351	0.0336168	0.0809533	0.415262	0.67795	0.949746	CNOT2	40.9829	42.3437	36.2216	36.9552	276.437	-0.0739927	0.133836	-0.552862	0.580358	0.749902
ENST00000229214	KRR1	9.77001	10.3761	9.81137	9.68606	1079.63	-0.023176	0.0696044	-0.332968	0.739158	0.961733	KRR1	59.1819	55.5965	73.4661	63.6962	314.133	0.390502	0.12862	3.03608	0.00239677	0.0101795
ENST00000229238	MRPL51	159.888	175.169	168.749	175.053	1643.51	0.0612231	0.059088	1.03613	0.30014	0.764163	MRPL51	571.428	578.106	573.696	637.491	1001.89	0.214761	0.0777011	2.76394	0.00571087	0.0217632
ENST00000229266	CHPT1	35.1411	35.7114	33.8025	32.3977	580.614	-0.0739471	0.0942099	-0.784918	0.432501	0.854468	CHPT1	56.5662	56.8375	24.5036	25.4092	214.91	-1.03862	0.157378	-6.59953	4.12e-11	5.03e-10
ENST00000229268	USP5	56.4144	57.7478	60.9753	64.0417	2051.74	0.155083	0.05045	3.074	0.00211211	0.02969	USP5	84.1125	87.7157	83.6211	86.2338	967.207	0.127533	0.075553	1.688	0.0914119	0.209645
ENST00000229270	TPI1	657.458	661.23	738.321	734.523	13272.9	0.18354	0.0188686	9.72727	2.31e-22	2.87e-20	TPI1	2425.07	2437.48	3117.66	3135.17	10516.5	0.510854	0.0224531	22.7521	1.37e-114	2.46e-112
ENST00000229281	C12orf57	120.466	117.693	92.473	94.5264	642.318	-0.324855	0.0898131	-3.61702	0.00029802	0.00568729	C12orf57	466.166	462.589	473.067	430.845	767.32	0.0877928	0.0855433	1.0263	0.304752	0.503611
ENST00000229314	GOLT1B	25.7742	24.4668	24.5347	25.1142	875.906	0.00693027	0.0770179	0.0899826	0.928301	0.987145	GOLT1B	205.755	179.416	105.081	107.23	265.985	-0.716309	0.142697	-5.01978	5.17e-07	4.28e-06
ENST00000229329	CMAS	17.5312	15.8475	16.0406	17.3612	314.679	0.0250309	0.130452	0.191878	0.847838	0.977932	CMAS	52.2753	46.5444	51.0904	46.3707	282.919	0.12599	0.135281	0.931323	0.351687	0.549785
ENST00000229330	HCFC2	2.78652	2.71421	2.63465	2.89423	168.29	0.0314029	0.175568	0.178864	0.858044	0.979578	HCFC2	4.83289	4.69371	3.51287	4.37739	45.4747	-0.140267	0.336087	-0.417352	0.676421	0.816651
ENST00000229340	RAB35	24.1578	23.4698	23.6146	22.9879	725.15	-0.00736308	0.08412	-0.0875307	0.93025	0.988026	RAB35	192.508	190.529	165.682	149.765	465.515	-0.125907	0.106652	-1.18054	0.237785	0.422293
ENST00000229379	COX6A1	381.354	381.489	389.553	401.653	2249.97	0.0767046	0.0473862	1.61871	0.10551	0.481392	COX6A1	1629.38	1648.61	856.238	848.687	1775.63	-0.807425	0.0565715	-14.2727	3.24e-46	1.61e-44
ENST00000229390	SRSF9	87.3227	83.8431	80.8578	86.2309	1050.33	-0.010743	0.0710174	-0.151272	0.879761	0.981012	SRSF9	370.956	371.646	326.554	352.391	1039.11	0.00711635	0.0736514	0.0966221	0.923027	0.962979
ENST00000229395	FGFR1OP2	10.5632	10.5349	10.2794	10.0639	327.495	-0.0285226	0.125151	-0.227905	0.81972	0.972358	FGFR1OP2	45.9372	44.08	33.3237	42.1121	137.137	-0.106095	0.1962	-0.540752	0.588678	0.755452
ENST00000229595	ASF1A	10.9115	10.7096	11.304	10.6993	286.255	0.0493125	0.134223	0.367393	0.713326	0.960031	ASF1A	50.4894	57.4184	47.1138	51.3983	138.254	0.0159176	0.193191	0.0823933	0.934334	0.969172
ENST00000229633	HINT3	10.0274	8.40499	9.79086	8.49543	329.109	0.01252	0.134017	0.0934211	0.925569	0.986936	HINT3	37.4734	39.3092	40.3015	35.3101	91.8225	0.104756	0.234263	0.447175	0.654748	0.801607
ENST00000229708	ULBP1	0.814388	1.06884	0.686799	0.94838	30.4367	-0.179663	0.413642	-0.434345	0.664038	0.946368	ULBP1	3.42263	3.4495	1.03659	1.73275	7.174	-1.35236	0.913923	-1.47973	0.138946	0.288728
ENST00000229758	FBXO5	18.142	17.7036	16.105	17.0754	382.073	-0.0874285	0.11656	-0.750073	0.453211	0.865291	FBXO5	22.4194	19.6141	18.6724	18.5385	113.925	-0.00782601	0.212906	-0.036758	0.970678	0.985603
ENST00000229769	FANCE	3.39437	3.77488	3.95437	3.8726	104.173	0.150678	0.221873	0.679119	0.497063	0.883813	FANCE	2.59677	2.87888	5.19066	3.47068	24.949	0.874424	0.460803	1.89761	0.0577475	0.146515
ENST00000229795	MAPK14	12.3742	11.9385	12.4491	11.8162	565.575	0.021217	0.0958304	0.221402	0.82478	0.973405	MAPK14	34.9901	35.0699	22.9508	24.8978	139.312	-0.427565	0.19075	-2.24149	0.0249941	0.0748494
ENST00000229812	STK38	16.2298	17.893	15.8181	15.7586	634.715	-0.0878218	0.092232	-0.952184	0.341004	0.798612	STK38	22.1502	19.1565	19.944	19.6394	124.642	0.0518192	0.201108	0.257669	0.796663	0.892876
ENST00000229903	SAYSD1	4.7784	5.50707	6.40081	5.46377	120.564	0.230099	0.210269	1.09431	0.27382	0.743125	SAYSD1	17.4935	19.9305	6.91057	10.6276	32.6582	-0.985038	0.410441	-2.39995	0.0163973	0.0525906
ENST00000229922	CAP2	8.66079	8.01786	9.08334	9.69309	279.7	0.194953	0.136883	1.42424	0.154378	0.582198	CAP2	35.4533	34.7023	34.6427	36.3406	221.53	0.149631	0.148687	1.00635	0.314245	0.513758
ENST00000229955	GPR63	0.273902	0.178029	0.175993	0.246375	14.0599	-0.0735978	0.613511	-0.119962	0.904514	0.984803	GPR63	0.996566	0.502195	0.402429	0.20181	2.79537	-1.15912	1.5253	-0.75993	0.447296	NA
ENST00000230036	GPLD1	0.804485	0.832676	0.652942	0.870537	49.3171	-0.0797653	0.322526	-0.247314	0.804665	0.968931	GPLD1	0.579946	0.2505	0.100368	0	2.6467	-3.03287	1.97319	-1.53704	0.124284	NA
ENST00000230048	ACOT13	8.43274	9.14012	9.09558	9.77065	397.059	0.126509	0.115672	1.09369	0.274091	0.743125	ACOT13	187.903	204.408	198.728	216.228	378.239	0.221453	0.116296	1.90422	0.056882	0.144853
ENST00000230050	RPS12	1154.3	1161.56	1145.14	1131.5	6226.69	-0.00059679	0.0280111	-0.0213055	0.983002	0.997793	RPS12	1126.68	1156.78	1820.31	1823.13	2618.28	0.822611	0.0459222	17.9131	9.31e-72	8.24e-70
ENST00000230056	GMNN	24.3927	23.0329	24.7779	25.1089	331.387	0.0970229	0.124884	0.776906	0.437214	0.85664	GMNN	72.2574	84.9062	89.553	90.2226	232.6	0.32853	0.148347	2.2146	0.0267875	0.079243
ENST00000230085	SNX3	50.9478	52.2232	51.5155	52.0596	855.506	0.0296817	0.0771271	0.384841	0.700355	0.956291	SNX3	260.761	264.54	224.824	232.797	521.055	-0.05246	0.0996695	-0.526339	0.598653	0.761855
ENST00000230122	ZBTB24	5.55255	5.92246	6.0699	6.10758	351.977	0.109766	0.121318	0.904778	0.365583	0.813814	ZBTB24	8.48702	7.54733	6.53183	6.42984	66.2198	-0.146413	0.276271	-0.529963	0.596138	0.759674
ENST00000230124	FIG4	3.98959	3.85372	4.18525	4.56862	134.777	0.182498	0.195573	0.933147	0.350744	0.80325	FIG4	10.1283	9.82113	8.83059	8.20412	110.907	-0.0647458	0.212875	-0.304149	0.761015	0.870322
ENST00000230340	BYSL	16.4103	17.4085	15.7094	17.5422	310.595	-0.000348284	0.13091	-0.00266049	0.997877	0.999941	BYSL	38.8577	40.7678	44.3731	46.0524	244.387	0.35101	0.142629	2.46099	0.0138554	0.0457746
ENST00000230431	DNPH1	32.8368	39.0541	28.2917	26.8515	224.736	-0.358568	0.157491	-2.27675	0.0228009	0.183959	DNPH1	103.59	108.032	95.9378	84.0724	224.697	-0.0712959	0.149803	-0.47593	0.634124	0.787191
ENST00000230449	EXOC2	9.29789	9.09576	9.16759	10.3924	456.02	0.112745	0.108932	1.035	0.300667	0.764163	EXOC2	15.892	15.4095	13.869	11.9883	172.741	-0.120889	0.17116	-0.706292	0.480006	0.66863
ENST00000230461	TMEM30A	63.148	60.8702	56.1205	57.6144	2830.53	-0.100841	0.0429842	-2.34601	0.0189755	0.159679	TMEM30A	163.477	159.709	33.8637	30.4504	447.779	-2.18456	0.124937	-17.4854	1.85e-68	1.55e-66
ENST00000230582	PRSS16	0.283058	0.452872	0.436501	0.581966	13.6717	0.492871	0.622204	0.792138	0.42828	0.85255	PRSS16	1.76015	1.63751	1.64025	2.79668	13.7346	0.639614	0.614726	1.04049	0.298114	0.496016
ENST00000230640	MTREX	37.1974	37.1339	38.7874	38.6525	1620.84	0.0831444	0.0555221	1.4975	0.134263	0.54322	SKIV2L2	40.4738	41.1281	41.5072	39.7636	562.173	0.142874	0.0966037	1.47897	0.139147	0.289024
ENST00000230792	NUDT12	2.06171	1.8742	2.4086	2.04718	78.9444	0.202996	0.255242	0.79531	0.426433	0.851567	NUDT12	4.06716	4.70636	6.02207	4.02659	29.2473	0.301243	0.418416	0.719961	0.471549	0.662286
ENST00000230859	TENT4A	5.34502	5.36103	5.1568	4.90596	281.539	-0.065366	0.135338	-0.482985	0.629106	0.933964	PAPD7	5.9752	5.84499	4.04513	3.4165	8.10129	-1.32946	0.862321	-1.54173	0.12314	0.26365
ENST00000230990	HBEGF	3.7775	4.05457	5.92323	6.41273	128.436	0.679457	0.201733	3.36811	0.00075686	0.0124907	HBEGF	2.00751	2.36048	2.83732	4.06531	7.69704	0.8122	0.838024	0.969184	0.332453	0.531042
ENST00000231061	SPARC	1.30238	1.1129	0.730327	0.882424	37.4107	-0.55864	0.372175	-1.50101	0.133352	0.541091	SPARC	11.7138	15.0465	4.7302	6.6977	36.6109	-1.01574	0.390368	-2.60201	0.00926789	0.0327589
ENST00000231134	PCDHB5	0.64704	0.647011	0.739108	0.708269	25.2118	0.18558	0.443935	0.418034	0.675922	0.949534	PCDHB5	1.48816	1.58807	0.106049	0.531814	8.81966	-2.03356	0.894332	-2.27383	0.0229764	0.0698197
ENST00000231198	THG1L	11.84	12.2927	12.1577	11.5746	372.223	-9.73e-05	0.117947	-0.000824674	0.999342	0.999941	THG1L	38.7669	43.0725	45.8324	43.1305	171.401	0.231681	0.17074	1.35692	0.174806	0.340407
ENST00000231238	TTC1	46.3886	44.2317	49.4831	51.0832	742.989	0.174277	0.0834913	2.08737	0.0368551	0.25684	TTC1	88.8986	88.3955	106.252	107.146	377.422	0.402031	0.115287	3.48721	0.00048809	0.00247218
ENST00000231368	LNPEP	13.5031	12.8762	11.9001	12.1244	1648.05	-0.110866	0.0562886	-1.96961	0.0488834	0.311118	LNPEP	19.8257	21.8289	4.03038	3.71232	161.874	-2.29532	0.20956	-10.953	6.43e-28	1.84e-26
ENST00000231461	ST8SIA4	6.52871	6.81283	6.87805	6.34603	452.646	0.0112809	0.107848	0.1046	0.916693	0.986019	ST8SIA4	17.6407	21.296	4.93172	5.41739	56.0155	-1.81423	0.336293	-5.39481	6.86e-08	6.3e-07
ENST00000231498	NUP155	26.5474	25.7664	26.7483	28.1524	2332.28	0.09367	0.047714	1.96315	0.0496283	0.314721	NUP155	25.2658	23.3968	22.9107	22.0666	428.513	0.00770021	0.109934	0.0700437	0.944159	0.973062
ENST00000231509	NR3C1	60.3468	59.9076	61.5146	60.3002	2320.58	0.0426351	0.0464662	0.917551	0.358854	0.807951	NR3C1	57.4281	62.7473	37.7115	36.3014	497.082	-0.54493	0.10498	-5.19082	2.09e-07	1.82e-06
ENST00000231512	C5orf15	31.4102	29.0933	29.2295	29.4197	702.697	-0.0208792	0.0867648	-0.240641	0.809833	0.969577	C5orf15	167.812	174.688	46.4495	38.6097	363.512	-1.87543	0.133547	-14.0433	8.47e-45	4.04e-43
ENST00000231524	TRIM23	6.76935	6.68444	7.01368	6.98607	285.934	0.0814248	0.133799	0.608559	0.542817	0.903342	TRIM23	12.6093	13.4414	9.4003	10.0174	86.4029	-0.286003	0.2421	-1.18134	0.237466	0.421787
ENST00000231572	RARS1	90.268	92.6901	97.4926	97.4867	2162.47	0.115849	0.0482634	2.40035	0.0163793	0.143401	RARS	107.132	111.692	108.963	110.31	957.383	0.160241	0.0753185	2.12751	0.0333777	0.0946477
ENST00000231668	BNIP1	10.6192	8.66583	10.5093	9.72446	142.675	0.0932946	0.195074	0.478251	0.632471	0.934476	BNIP1	25.4235	19.1526	22.3994	24.6499	83.4928	0.184477	0.249028	0.740788	0.458822	0.650383
ENST00000231790	MLH1	37.3206	36.4343	39.4543	38.7361	1021.79	0.108285	0.0704977	1.536	0.124537	0.525374	MLH1	38.2028	43.5127	36.3554	39.1474	391.959	0.0104432	0.116798	0.0894129	0.928754	0.965944
ENST00000231887	EHHADH	2.60141	3.16025	2.59705	3.03892	116.772	-0.00774727	0.21562	-0.0359302	0.971338	0.995175	EHHADH	6.64171	4.85062	5.13083	5.73079	54.1644	0.0947597	0.309625	0.306047	0.759569	0.869868
ENST00000232375	PFKFB4	2.05523	1.42459	1.44062	1.74064	62.8075	-0.105412	0.296239	-0.355836	0.721964	0.960728	PFKFB4	2.96774	6.13163	4.13455	3.96649	26.3077	-0.0383725	0.459172	-0.0835689	0.933399	0.968986
ENST00000232424	HES1	12.0892	11.4661	17.6025	18.2681	252.743	0.63079	0.14361	4.39237	1.12e-05	0.0003058	HES1	9.69339	8.76749	19.2706	15.7037	51.2741	1.01588	0.322627	3.14878	0.00163951	0.00729936
ENST00000232496	TUSC2	11.2614	10.6244	10.9482	11.8284	200.977	0.0815912	0.160894	0.507112	0.612076	0.929143	TUSC2	31.6334	27.4183	22.9933	22.2927	37.4851	-0.222407	0.367245	-0.605608	0.544775	0.719765
ENST00000232501	NPRL2	11.023	11.8174	12.6672	12.8707	201.19	0.185094	0.160219	1.15525	0.247986	0.716437	NPRL2	20.5118	17.3504	17.3055	18.2468	91.8091	0.0509627	0.235702	0.216217	0.828819	0.910951
ENST00000232564	GNB4	6.96194	7.09104	7.23381	6.85091	479	0.027291	0.103889	0.262693	0.792787	0.968264	GNB4	39.7093	41.8776	26.5325	28.8493	153.036	-0.397559	0.181706	-2.18792	0.0286751	0.0839453
ENST00000232607	UMPS	13.4519	13.2179	13.0874	13.1813	949.223	0.00217468	0.0730799	0.0297576	0.97626	0.996614	UMPS	68.7236	71.7473	80.4448	79.802	477.448	0.308509	0.104535	2.95125	0.00316491	0.0130093
ENST00000232744	ABTB1	1.33282	1.29112	1.71278	0.856338	27.4629	-0.00647245	0.44599	-0.0145126	0.988421	0.997979	ABTB1	9.17237	11.152	7.4079	7.42982	55.6004	-0.28208	0.305455	-0.923475	0.35576	0.554194
ENST00000232766	KLHL18	4.93283	5.5514	5.97553	6.29324	283.675	0.250827	0.137016	1.83065	0.0671532	0.375033	KLHL18	9.33572	9.40901	7.34398	7.07109	62.1297	-0.207217	0.284276	-0.728928	0.466045	0.657089
ENST00000232888	RRP9	21.4631	25.1717	22.4059	23.2898	383.76	-0.00528416	0.121036	-0.0436578	0.965177	0.994818	RRP9	31.3537	29.9756	43.1307	41.3001	229.115	0.594672	0.147068	4.04352	5.27e-05	0.000319622
ENST00000232892	AADAC	3.08471	3.0323	3.49378	2.95609	52.9604	0.100469	0.308074	0.326119	0.744334	0.962265	AADAC	0.8721	0.351578	0.211301	0.423852	3.44934	0.0121009	1.3322	0.0090834	0.992753	0.997327
ENST00000232905	EIF1B	11.7569	11.922	9.46943	11.2775	118.137	-0.16665	0.210984	-0.789873	0.429602	0.852829	EIF1B	144.73	137.176	138.028	134.695	205.329	0.0726821	0.155241	0.468188	0.63965	0.790328
ENST00000232974	ZBTB47	2.26088	2.18641	1.81587	1.94956	121.548	-0.216071	0.206175	-1.04799	0.294641	0.761177	ZBTB47	0.931641	0.938954	0.451453	0.339592	6.31372	-1.08969	0.96037	-1.13466	0.256518	0.446589
ENST00000232978	NKTR	9.00987	8.70578	9.33787	9.94437	724.835	0.146286	0.0849442	1.72214	0.0850438	0.430102	NKTR	2.18967	1.67914	2.71034	3.35457	47.675	0.800035	0.332819	2.40382	0.0162249	0.0521293
ENST00000233027	NEK4	6.91227	7.61397	7.00909	6.90457	463.969	-0.0381095	0.107181	-0.355562	0.722169	0.960728	NEK4	5.70982	5.50444	5.61391	4.92671	61.066	0.0847178	0.286755	0.295437	0.76766	0.87502
ENST00000233055	WDFY1	11.9909	12.2741	11.99	12.2628	602.544	0.0233153	0.0921898	0.252905	0.800341	0.968325	WDFY1	50.2431	48.5847	45.4446	41.6605	254.368	-0.0331638	0.13996	-0.236952	0.812694	0.901062
ENST00000233057	EIF2AK2	12.9357	12.7959	11.9175	12.2536	1341.52	-0.0662205	0.0614874	-1.07698	0.281491	0.75113	EIF2AK2	47.8692	50.6637	39.9358	38.3659	320.638	-0.192071	0.125551	-1.52983	0.12606	0.268712
ENST00000233078	DAZAP1	49.9392	49.7479	39.0889	39.2323	1035.45	-0.323966	0.0702095	-4.61428	3.94e-06	0.000119823	DAZAP1	94.2163	90.6476	92.3877	90.3757	495.895	0.111312	0.102485	1.08613	0.27742	0.47128
ENST00000233099	HEATR5B	6.72645	6.24319	6.79713	6.70589	495.126	0.0821711	0.102854	0.798909	0.424343	0.851167	HEATR5B	6.51914	5.89297	6.10639	6.53276	170.58	0.139145	0.171122	0.813132	0.416143	0.611773
ENST00000233121	MAPRE3	2.59425	3.02649	3.38937	3.38916	63.2211	0.294271	0.282847	1.04039	0.298159	0.76327	MAPRE3	33.187	33.6971	33.3035	31.5966	121.43	0.129558	0.202297	0.640436	0.521889	0.700508
ENST00000233143	TMSB10	2217.04	2218.36	2327.41	2355.29	11333.8	0.102314	0.0205646	4.97526	6.52e-07	2.26e-05	TMSB10	17933	17863.4	22276.7	22705.9	11835.4	0.471769	0.0215033	21.9394	1.09e-106	1.76e-104
ENST00000233146	MSH2	32.8449	33.1582	34.1846	33.4072	1121.92	0.0583517	0.0671265	0.86928	0.384694	0.828386	MSH2	36.8831	37.0225	41.0713	43.1845	489.882	0.326259	0.102339	3.18801	0.00143255	0.00647023
ENST00000233154	NCK2	4.72044	4.22982	3.78148	3.89942	119.449	-0.196628	0.208823	-0.941602	0.346396	0.800145	NCK2	9.34019	9.78267	7.7653	7.78828	43.316	-0.119278	0.339299	-0.351543	0.725181	0.849094
ENST00000233156	TFPI	26.1737	26.7443	25.6346	25.7691	1085.09	-0.0178438	0.0683082	-0.261225	0.793919	0.968264	TFPI	225.492	230.031	51.0291	52.5709	542.317	-1.97192	0.110873	-17.7853	9.19e-71	8.02e-69
ENST00000233331	INO80B	16.3299	17.2287	13.2491	13.4262	191.578	-0.307133	0.164943	-1.86206	0.0625953	0.359664	INO80B	23.8495	25.4159	22.735	25.8901	113.18	0.0704068	0.212177	0.331831	0.740017	0.859238
ENST00000233336	TTL	4.84573	4.42168	5.10832	5.38769	760.491	0.203633	0.0847192	2.40362	0.0162335	0.142806	TTL	25.4746	27.1629	12.747	12.5604	93.5848	-0.96359	0.239532	-4.0228	5.75e-05	0.000347224
ENST00000233379	FAHD2A	4.22713	4.50075	4.44252	5.07999	235.003	0.149766	0.150667	0.994018	0.320214	0.781674	FAHD2A	14.6279	15.1895	17.9895	16.6962	65.8406	0.402977	0.275378	1.46336	0.143369	0.294992
ENST00000233468	SF3B6	104.941	103.431	110.016	111.622	754.818	0.113079	0.0820679	1.37786	0.168245	0.607535	SF3B6	465.998	499.396	539.577	526.292	845.62	0.279989	0.0804914	3.4785	0.000504222	0.00254142
ENST00000233535	SLC30A3	0.556667	0.695803	0.35768	0.572253	17.2514	-0.40548	0.554317	-0.731496	0.464476	0.869684	SLC30A3	1.25555	1.26541	0.651873	1.08967	5.10108	-0.275222	1.04517	-0.263327	0.792299	0.890079
ENST00000233575	SNX17	50.0991	54.8812	55.6931	54.5759	1367.91	0.0949568	0.0637641	1.48919	0.136437	0.548062	SNX17	152.81	150.278	153.55	143.21	924.349	0.119288	0.077233	1.54452	0.122463	0.262626
ENST00000233623	TTC31	7.78634	7.40803	6.41164	8.74261	265.313	0.0202419	0.221113	0.0915455	0.927059	0.986942	TTC31	13.8114	13.9199	15.9196	14.0116	90.1205	0.328691	0.237276	1.38527	0.165971	0.32734
ENST00000233630	PCGF1	10.9018	10.7212	12.0414	10.7671	108.659	0.101035	0.217421	0.464697	0.642148	0.937899	PCGF1	29.0197	28.4351	35.4814	36.2393	113.219	0.470117	0.209895	2.23978	0.0251053	0.0751278
ENST00000233668	DOK1	1.7911	2.07886	1.52076	1.68507	48.696	-0.247554	0.322945	-0.766553	0.443348	0.859308	DOK1	2.45965	1.60403	2.62918	2.81275	15.0231	0.67104	0.592288	1.13296	0.25723	0.447399
ENST00000233809	IGFBP2	13.3501	13.1183	9.7291	10.991	179.688	-0.329199	0.171509	-1.91942	0.0549311	0.333756	IGFBP2	67.6663	64.9603	15.3053	10.147	167.784	-2.2172	0.206591	-10.7323	7.18e-27	1.98e-25
ENST00000233838	GGCX	6.87839	6.8132	7.57453	7.4073	584.259	0.153959	0.0934634	1.64726	0.0995044	0.468381	GGCX	30.9407	29.8881	15.0154	13.4981	222.665	-0.936611	0.155386	-6.02764	1.66e-09	1.79e-08
ENST00000233893	HSPE1	279.487	288.57	296.191	286.558	1728.12	0.0608788	0.0545492	1.11604	0.264407	0.732661	HSPE1	764.847	770.164	881.938	845.584	1095.05	0.307049	0.0703977	4.36164	1.29e-05	8.79e-05
ENST00000233969	SLC9A2	1.64867	2.01334	1.87493	1.83732	111.346	0.0437216	0.218199	0.200375	0.841187	0.976002	SLC9A2	2.6569	3.45517	0.726801	0.416544	18.3529	-2.4235	0.635974	-3.8107	0.000138575	0.000784289
ENST00000234038	PPP1R7	14.9039	14.9032	15.9605	15.7432	321.928	0.113032	0.126057	0.89667	0.369895	0.817294	PPP1R7	75.7796	82.804	96.4869	101	422.784	0.464582	0.111734	4.15793	3.21e-05	0.000203509
ENST00000234091	ID2	24.0231	22.5407	19.5006	19.0878	468.137	-0.247018	0.105985	-2.3307	0.0197694	0.164562	ID2	278.894	273.232	153.518	166.593	382.133	-0.630598	0.117593	-5.36254	8.21e-08	7.47e-07
ENST00000234111	ODC1	94.2604	96.4014	102.809	105.009	2660.62	0.148346	0.0435947	3.40285	0.000666861	0.0112198	ODC1	53.4406	57.6638	47.9153	46.4062	313.128	-0.111349	0.128036	-0.869675	0.384478	0.583029
ENST00000234160	GORASP2	22.5086	20.9047	21.2433	20.8129	563.716	-0.0217884	0.0966325	-0.225477	0.821608	0.972658	GORASP2	96.384	83.4851	76.6614	75.0175	490.287	-0.0920847	0.106442	-0.865117	0.386974	0.585479
ENST00000234170	CEBPZ	45.1578	48.4772	47.172	49.0521	1712.68	0.0634007	0.056665	1.11887	0.263196	0.732179	CEBPZ	32.2877	34.8703	37.3551	34.9786	484.45	0.237588	0.10578	2.24605	0.0247006	0.0741677
ENST00000234195	RMDN2	0.988035	1.27616	0.846468	1.00512	22.0046	-0.266152	0.483116	-0.550907	0.581698	0.918284	RMDN2	1.45746	2.08094	0.882816	0.442714	9.04012	-1.3128	0.813924	-1.61292	0.106761	0.236655
ENST00000234256	SLC1A4	5.22943	5.47991	5.77663	4.9478	263.645	0.0260651	0.143131	0.182107	0.855499	0.978878	SLC1A4	10.2036	12.1295	6.02207	5.40411	58.7885	-0.872975	0.303415	-2.87717	0.00401261	0.0159795
ENST00000234296	ORC2	9.20479	9.66175	9.99209	10.1139	450.608	0.115842	0.106972	1.08292	0.278842	0.748641	ORC2	21.9515	23.0963	19.4334	20.8099	161.654	-0.0130477	0.175189	-0.0744777	0.94063	0.971943
ENST00000234392	VAX2	1.12618	1.61882	0.814069	1.17581	14.7988	-0.440021	0.601084	-0.732045	0.464141	0.869684	VAX2	2.1598	2.66048	0.581441	0.583161	5.45065	-1.89723	1.11697	-1.69855	0.0894045	0.206071
ENST00000234396	ATP6V1B1	0.771336	0.299951	0.605749	0.991166	13.7399	0.599908	0.648404	0.925206	0.354859	0.80551	ATP6V1B1	0.40698	0.27345	0.493035	0.659325	3.38133	1.1042	1.3314	0.829353	0.406905	0.603224
ENST00000234420	MSH6	40.005	39.3198	41.5356	40.1591	3218.08	0.066503	0.0398781	1.66766	0.0953839	0.457088	MSH6	51.0694	49.4589	50.8953	55.5847	922.851	0.213208	0.0795386	2.68056	0.00735001	0.0270206
ENST00000234453	PLEKHA3	2.31768	2.23523	2.20734	2.53224	348.051	0.0820141	0.124611	0.65816	0.510435	0.892001	PLEKHA3	18.0943	19.873	10.6791	8.45584	56.2786	-0.742836	0.305218	-2.43378	0.0149419	0.0487273
ENST00000234454	SPR	55.24	50.6725	60.8676	64.0904	891.835	0.2626	0.0782458	3.35609	0.000790532	0.0129769	SPR	169.318	169.572	154.405	144.494	551.553	-0.0584183	0.0977397	-0.597693	0.550045	0.724331
ENST00000234739	BCL9	2.54835	2.75949	2.51126	2.73168	176.016	0.00630751	0.172348	0.0365976	0.970806	0.995175	BCL9	2.48897	2.06583	1.3007	1.42314	32.3755	-0.526704	0.399533	-1.3183	0.187403	0.357245
ENST00000234831	TMEM59	12.5672	12.5034	11.9376	12.4898	861.477	-0.0134617	0.0771997	-0.174375	0.861571	0.979578	TMEM59	177.754	163.515	53.2477	64.1387	475.759	-1.38831	0.115702	-11.999	3.59e-33	1.22e-31
ENST00000234875	RPL22	164.786	160.813	146.185	154.226	3476.86	-0.0921171	0.0394913	-2.3326	0.0196694	0.164285	RPL22	1135.24	1132.65	1375.29	1419.66	2147.26	0.448487	0.0507775	8.8324	1.02e-18	1.97e-17
ENST00000235090	WDR77	29.3801	29.1792	29.5889	31.6821	793.505	0.0893464	0.081075	1.10202	0.270452	0.73949	WDR77	83.8378	78.9587	88.0067	88.7616	370.251	0.28882	0.117203	2.46427	0.0137293	0.0454792
ENST00000235307	C1orf21	0.269935	0.285801	0.224456	0.285654	29.5634	-0.0995277	0.412859	-0.241069	0.809501	0.969577	C1orf21	2.30061	2.89834	4.18061	2.09649	4.8164	0.576375	1.07512	0.536101	0.591889	0.757518
ENST00000235332	MIIP	6.89386	6.57539	4.9066	6.40545	102.87	-0.22776	0.229014	-0.994523	0.319969	0.781674	MIIP	8.60951	7.41169	10.43	9.80703	46.7223	0.503284	0.327648	1.53605	0.124526	0.266222
ENST00000235345	SLC35D1	4.59198	4.69733	5.27364	4.20509	313.345	0.0531463	0.135948	0.390931	0.695848	0.956201	SLC35D1	13.3306	11.2619	4.98729	7.38397	42.1968	-0.901879	0.364008	-2.47764	0.0132256	0.0441344
ENST00000235372	PRDM2	3.27614	2.89602	3.6294	3.10129	276.863	0.148988	0.142275	1.04718	0.295017	0.761415	PRDM2	2.55203	2.40876	3.14073	3.05158	61.8872	0.425083	0.283895	1.49732	0.134309	0.281788
ENST00000235382	RGS2	40.3744	37.0992	45.2624	43.6237	604.866	0.222278	0.0937944	2.36985	0.0177954	0.152293	RGS2	26.3862	28.9202	34.7625	27.2511	82.9312	0.285577	0.250106	1.14183	0.253526	0.442637
ENST00000235521	WARS2	4.40697	4.49433	4.87569	5.02541	141.983	0.177614	0.189832	0.935636	0.349461	0.801893	WARS2	11.9856	11.8848	15.6908	14.0931	63.9713	0.447714	0.279934	1.59936	0.109741	0.241703
ENST00000235835	AKR7A2	25.3796	26.3384	23.131	24.209	363.561	-0.103561	0.119426	-0.867158	0.385855	0.829231	AKR7A2	50.2082	51.5792	52.1353	53.7028	248	0.221954	0.140604	1.57857	0.114435	0.249249
ENST00000236040	P3H1	10.0203	10.5386	11.333	11.3674	349.169	0.167004	0.121461	1.37496	0.169145	0.609535	P3H1	14.7151	15.0051	3.77503	4.62757	98.6894	-1.64278	0.248099	-6.62147	3.56e-11	4.36e-10
ENST00000236137	SLC19A2	4.59272	4.25317	4.41923	4.53525	173.33	0.0416331	0.172823	0.2409	0.809633	0.969577	SLC19A2	7.14139	5.22168	2.54454	2.04165	27.6064	-1.27496	0.458393	-2.78137	0.00541293	0.0207362
ENST00000236192	VAMP4	1.65835	1.3299	1.5192	1.35032	78.5784	-0.0344878	0.25885	-0.133235	0.894008	0.983379	VAMP4	12.3393	15.9183	10.1649	6.59676	20.7485	-0.650927	0.508512	-1.28006	0.200523	0.373688
ENST00000236273	SYF2	17.9995	14.7897	17.2734	17.9297	322.135	0.126498	0.133423	0.948097	0.34308	0.799693	SYF2	77.0398	68.408	87.4315	79.6867	255.262	0.342999	0.140667	2.43837	0.0147536	0.0481722
ENST00000236671	CTSD	126.336	123.308	85.6472	87.2771	2337.35	-0.505697	0.047139	-10.7278	7.54e-27	1.11e-24	CTSD	122.464	129.555	39.2896	36.122	2537.41	-1.83927	0.0528304	-34.8146	1.46e-265	9.05e-263
ENST00000236925	CAMSAP2	18.4412	18.2008	17.3045	19.3271	1414.47	0.0236353	0.0636264	0.37147	0.710288	0.959608	CAMSAP2	9.76834	10.0334	8.60642	8.34794	177.225	-0.0871797	0.167227	-0.521324	0.602141	0.764037
ENST00000236959	ATIC	11.5202	10.3594	11.1831	11.6084	237.511	0.0829406	0.14884	0.557248	0.577358	0.916542	ATIC	195.849	196.439	220.172	224.537	1642.4	0.326993	0.0574092	5.69583	1.23e-08	1.23e-07
ENST00000237163	DOP1A	2.41221	1.95217	2.19356	2.35103	192.043	0.0823893	0.170407	0.483485	0.628752	0.933964	DOPEY1	1.1524	0.764853	1.43012	0.956234	35.0624	0.487516	0.393349	1.2394	0.215198	0.394043
ENST00000237172	FILIP1	11.3694	11.5275	12.2774	10.6458	572.626	0.0256842	0.0986457	0.260369	0.794579	0.968264	FILIP1	1.26221	1.56123	0.764549	0.975942	16.9458	-0.636546	0.556015	-1.14484	0.252277	0.441014
ENST00000237264	TBPL1	3.93122	4.04781	4.15158	3.4511	176.336	-0.0456757	0.174562	-0.261658	0.793585	0.968264	TBPL1	29.5586	27.1509	23.117	22.7308	62.4865	-0.169167	0.283649	-0.596393	0.550912	0.725165
ENST00000237281	FBXO30	5.39013	5.04682	5.78969	5.42967	528.547	0.128315	0.100078	1.28216	0.199788	0.654875	FBXO30	19.2433	20.5242	14.3721	13.8471	165.608	-0.365073	0.17463	-2.09055	0.0365686	0.102153
ENST00000237283	ADAT2	1.59668	1.57044	1.39594	1.59766	103.673	-0.0572452	0.223113	-0.256575	0.797507	0.968264	ADAT2	6.55855	9.54784	3.97267	6.64071	16.5964	-0.482115	0.572689	-0.841844	0.399875	0.59745
ENST00000237455	RNF103	6.24273	6.66488	5.82076	6.84576	240.031	-0.0031442	0.150375	-0.0209091	0.983318	0.997793	RNF103	22.4528	26.6224	8.00012	9.99888	145.737	-1.32703	0.203842	-6.51008	7.51e-11	8.92e-10
ENST00000237530	RPN2	174.042	179.098	189.517	191.958	4411.54	0.135389	0.0339062	3.99304	6.52e-05	0.00148371	RPN2	288.521	277.67	98.2045	104.793	1566.2	-1.33852	0.0636987	-21.0134	4.95e-98	6.89e-96
ENST00000237536	SOGA1	3.48877	3.5116	3.67825	3.71496	551.794	0.10281	0.0961218	1.06958	0.284807	0.752936	SOGA1	4.39935	4.85616	4.36518	5.19263	102.624	0.131329	0.223022	0.588862	0.555954	0.729476
ENST00000237596	PKD2	14.2594	14.596	14.9196	14.1552	794.732	0.0349632	0.0806779	0.433368	0.664747	0.946368	PKD2	12.7972	11.0137	2.52578	2.70797	89.454	-1.97234	0.272181	-7.24644	4.28e-13	6.02e-12
ENST00000237654	CCNI	42.7402	39.4803	39.3568	39.5447	1198.14	-0.0354177	0.0671486	-0.527453	0.597879	0.924482	CCNI	94.6989	89.4888	68.8784	59.6619	382.42	-0.376933	0.118727	-3.1748	0.0014994	0.00674514
ENST00000237696	RARRES1	7.72822	6.67841	6.68221	7.41741	131.624	-0.00704996	0.200792	-0.0351108	0.971991	0.995407	RARRES1	14.2028	12.1671	5.44854	6.03989	35.7985	-1.07278	0.391529	-2.73997	0.00614439	0.0231588
ENST00000237853	ELL2	14.6157	14.7693	15.8982	15.4647	954.311	0.118018	0.0729372	1.61808	0.105645	0.481701	ELL2	7.50305	7.01399	11.4607	10.5698	77.2228	0.751342	0.256295	2.93155	0.00337279	0.0137543
ENST00000238018	GDA	0.433417	0.748596	0.810144	0.810095	15.6869	0.479061	0.579712	0.826377	0.40859	0.843877	GDA	1.92084	2.08484	2.506	2.33388	13.5855	0.424902	0.611602	0.694736	0.487221	0.675415
ENST00000238112	CPSF3	53.6833	53.4639	56.0637	54.9447	1328.67	0.0751109	0.0615487	1.22035	0.222333	0.683449	CPSF3	67.9656	65.3203	58.0548	54.0234	552.012	-0.103035	0.0979803	-1.05159	0.292988	0.49012
ENST00000238146	DDX55	16.5222	18.2444	15.262	16.5657	476.622	-0.103363	0.107227	-0.963963	0.335064	0.794014	DDX55	18.6743	20.9251	20.6557	21.5624	163.145	0.226399	0.175134	1.29272	0.196107	0.368348
ENST00000238156	CCDC92	3.87042	3.84093	3.69267	3.84315	114.54	-0.00918113	0.211109	-0.0434899	0.965311	0.994818	CCDC92	19.3432	16.3165	11.9714	9.19669	63.5894	-0.591056	0.290772	-2.03271	0.0420815	0.114784
ENST00000238379	HDHD3	8.10949	6.95069	6.92846	8.47397	150.621	0.0564508	0.191843	0.294255	0.768563	0.967067	HDHD3	18.5768	17.6048	14.7793	21.8976	59.5779	0.160281	0.299831	0.534571	0.592946	0.75767
ENST00000238497	VPS4B	15.3054	15.0844	13.7523	13.4368	517.714	-0.136522	0.0996454	-1.37008	0.170663	0.613034	VPS4B	40.5962	42.3367	41.5848	48.1831	252.556	0.245457	0.142053	1.72793	0.0840009	0.196023
ENST00000238561	ADCK1	2.10048	2.22541	2.3458	2.15287	77.7525	0.0805399	0.255116	0.315699	0.752231	0.964633	ADCK1	6.6533	6.3032	5.96449	6.14382	43.396	0.0291849	0.338456	0.0862295	0.931284	0.967277
ENST00000238609	IFI27L2	10.8717	11.4148	10.2454	10.7104	52.5585	-0.0647718	0.308199	-0.210162	0.833541	0.975453	IFI27L2	92.0776	90.1028	90.1457	89.1116	154.051	0.117755	0.178682	0.659018	0.509884	0.691511
ENST00000238616	NEK9	8.43051	8.50911	7.97951	7.90291	732.226	-0.068933	0.0834003	-0.826531	0.408503	0.843837	NEK9	30.1406	30.1623	24.8018	19.4338	335.974	-0.321563	0.184595	-1.74199	0.0815104	0.191583
ENST00000238628	IFT43	17.225	16.9238	17.8886	16.7293	151.274	0.04371	0.184451	0.236973	0.812678	0.970471	IFT43	55.5441	49.3943	56.206	55.9753	154.213	0.266244	0.179237	1.48543	0.13743	0.286279
ENST00000238647	IRF2BPL	11.6517	10.7881	7.56228	7.4862	420.315	-0.552415	0.113267	-4.8771	1.08e-06	3.57e-05	IRF2BPL	15.9995	14.9796	10.062	9.66685	133.108	-0.489668	0.195903	-2.49954	0.0124356	0.042094
ENST00000238651	ACOT2	19.4854	19.116	19.2981	19.8889	372.021	0.0457607	0.117494	0.389473	0.696926	0.956201	ACOT2	21.9011	21.9278	27.4048	20.8332	146.379	0.321192	0.192173	1.67137	0.0946489	0.215592
ENST00000238667	FLVCR2	1.73391	1.80138	1.56264	1.73616	66.8364	-0.0758399	0.274852	-0.27593	0.782602	0.968264	FLVCR2	3.04306	2.80026	0.801416	0.803787	12.3327	-1.71227	0.708719	-2.41601	0.0156918	0.0508006
ENST00000238714	PAPOLG	5.01567	4.70407	4.57332	4.84457	379.031	-0.0214803	0.117664	-0.182556	0.855146	0.978878	PAPOLG	9.07742	10.197	9.16401	7.46779	85.8446	-0.0748356	0.245741	-0.304531	0.760723	0.870272
ENST00000238721	TP53I3	50.6231	44.7382	49.9345	46.1199	852.977	0.0344633	0.0834096	0.413182	0.679473	0.950579	TP53I3	140.235	140.914	139.668	133.969	611.948	0.100481	0.0927687	1.08314	0.278749	0.472488
ENST00000238788	TMEM214	17.9737	17.6437	17.4907	17.6307	567.844	0.00380611	0.0948764	0.0401165	0.968	0.995107	TMEM214	38.6855	47.3368	34.5067	36.5724	356.421	-0.144499	0.126551	-1.14182	0.253528	0.442637
ENST00000238789	ATAD2B	5.21823	5.12734	5.23003	4.54364	439.852	-0.0580156	0.111496	-0.520336	0.602829	0.925418	ATAD2B	2.9594	2.98263	2.13953	2.14586	49.2723	-0.285465	0.32017	-0.891603	0.372606	0.569934
ENST00000238823	FAM98A	21.4768	19.6936	20.69	21.7957	620.468	0.0693974	0.0931395	0.74509	0.456217	0.866374	FAM98A	45.1418	46.5794	47.5255	47.6661	323.026	0.195722	0.124434	1.5729	0.115742	0.251521
ENST00000238831	YIPF4	5.58463	5.70741	5.69215	5.03303	709.394	-0.0502719	0.0882404	-0.569715	0.568871	0.913632	YIPF4	117.225	143.442	87.0732	82.8257	338.963	-0.469065	0.130781	-3.58665	0.000334952	0.00176209
ENST00000238855	AFTPH	15.3781	15.8742	15.6259	15.0887	687	-0.000997997	0.0865764	-0.0115274	0.990803	0.998282	AFTPH	15.9857	14.5375	10.3585	10.2084	84.3498	-0.544149	0.247894	-2.19509	0.0281572	0.0827026
ENST00000238875	LGALSL	2.90339	2.88207	3.48597	3.29513	130.71	0.253122	0.197929	1.27885	0.20095	0.65624	LGALSL	26.2999	33.031	29.4101	23.1061	64.1606	0.0450795	0.286238	0.157489	0.874859	0.937355
ENST00000238892	CRIPT	6.43617	6.37127	6.95892	7.25743	460.819	0.174607	0.105603	1.65344	0.0982424	0.463592	CRIPT	266.66	278.476	312.193	303.908	389.77	0.339719	0.113579	2.99104	0.00278029	0.0116015
ENST00000238936	MFSD13A	1.57592	1.86237	1.84107	1.17822	49.6185	-0.163453	0.330454	-0.494631	0.620861	0.932501	TMEM180	2.5576	2.84901	1.95688	2.78045	16.9586	-0.0387575	0.549473	-0.0705359	0.943767	0.972932
ENST00000238994	PPP1R3C	12.7675	12.2846	11.4892	11.1579	326.593	-0.121573	0.125839	-0.966104	0.333992	0.793497	PPP1R3C	19.0998	18.1434	11.7022	13.0705	63.9774	-0.470333	0.282525	-1.66475	0.0959631	0.217825
ENST00000239144	HOXB8	4.24367	3.79284	3.4265	3.04023	84.9974	-0.289518	0.247248	-1.17096	0.241614	0.709411	HOXB8	12.6013	12.9889	12.4902	13.2231	41.9601	0.0496058	0.344092	0.144164	0.885371	0.941932
ENST00000239165	HOXB7	16.7874	16.427	16.9503	16.5641	245.187	0.0370064	0.144688	0.255766	0.798131	0.968264	HOXB7	38.1642	42.989	29.5276	36.2393	104.311	-0.204985	0.224422	-0.913391	0.361037	0.559159
ENST00000239223	DUSP1	83.1396	82.527	139.863	140.376	2424.86	0.782417	0.0456888	17.1249	9.68e-66	4.11e-63	DUSP1	52.3374	61.5396	214.563	204.138	671.229	2.0347	0.100353	20.2754	2.12e-91	2.43e-89
ENST00000239231	PANK3	22.4699	21.9758	22.2112	22.3631	2465.49	0.0282053	0.0451658	0.624484	0.53231	0.899494	PANK3	50.2202	49.8562	32.8121	28.11	192.967	-0.564294	0.16465	-3.42722	0.000609787	0.00300145
ENST00000239243	MSX2	7.0736	7.59448	7.12858	7.22382	171.699	-0.00734144	0.173513	-0.0423105	0.966251	0.994818	MSX2	7.2982	6.56741	7.57833	8.55085	30.6092	0.21387	0.403973	0.529416	0.596517	0.759775
ENST00000239316	INSL4	14.4013	13.1866	15.9782	14.0944	303.519	0.148432	0.133666	1.11047	0.266797	0.734626	INSL4	139.187	146.335	75.8174	64.4834	192.494	-0.833118	0.166287	-5.01011	5.44e-07	4.48e-06
ENST00000239367	LRP11	34.1357	34.7188	37.4228	35.8023	1392.19	0.112824	0.0606939	1.8589	0.0630418	0.36158	LRP11	38.8332	35.9116	13.4894	13.8676	159.685	-1.2364	0.186144	-6.64218	3.09e-11	3.81e-10
ENST00000239440	ARAP3	1.30551	1.52303	1.19834	1.13836	73.1529	-0.251529	0.265522	-0.947301	0.343485	0.79988	ARAP3	3.33544	2.68022	2.83942	4.05267	66.8449	0.328358	0.285195	1.15135	0.249589	0.438099
ENST00000239666	PDZD11	39.1748	41.5235	43.9995	45.6077	479.041	0.175124	0.104188	1.68085	0.0927926	0.45055	PDZD11	162.551	175.851	224.021	216.228	359.881	0.514106	0.119508	4.30184	1.69e-05	0.000113249
ENST00000239690	NUDCD1	19.0587	18.7242	18.0072	19.4798	795.16	0.0126952	0.0814611	0.155843	0.876157	0.980887	NUDCD1	40.9444	44.0329	46.4205	41.7716	335.302	0.2018	0.124942	1.61516	0.106277	0.23575
ENST00000239830	CCDC77	9.55754	8.98867	8.62949	9.26814	225.924	-0.0273207	0.151955	-0.179794	0.857314	0.979578	CCDC77	9.26963	9.05495	9.50203	7.79739	57.468	0.0388084	0.297498	0.130449	0.896211	0.948826
ENST00000239882	ELF1	10.2426	9.6423	10.5072	10.9634	410.164	0.13472	0.112701	1.19537	0.231941	0.698088	ELF1	27.4327	30.3675	26.287	25.5451	220.143	0.00230999	0.151247	0.015273	0.987814	0.995199
ENST00000239891	ALG5	24.8709	24.4676	22.054	25.6707	318.913	-0.0239341	0.130358	-0.183603	0.854325	0.978839	ALG5	52.1952	50.0071	31.2255	25.8373	167.157	-0.709444	0.178558	-3.97318	7.09e-05	0.000423432
ENST00000239906	FAM53C	10.1581	9.9999	10.3165	11.1269	464.737	0.113217	0.105957	1.06851	0.28529	0.752936	FAM53C	12.7825	11.0936	14.625	14.6683	68.7819	0.457063	0.272126	1.6796	0.0930351	0.212737
ENST00000239938	EGR1	0.573099	0.729367	7.53215	7.16347	136.229	3.52011	0.26409	13.3292	1.57e-40	3.64e-38	EGR1	1.40981	1.29171	153.868	142.955	568.46	6.89853	0.318951	21.6288	9.62e-104	1.47e-101
ENST00000240079	WASHC3	21.1246	18.1589	19.6456	17.0252	180.539	-0.0752819	0.174347	-0.431793	0.665892	0.946368	CCDC53	85.0189	90.3865	73.4444	82.3791	212.594	-0.035791	0.153587	-0.233034	0.815735	0.902657
ENST00000240100	DUSP4	74.0516	72.1795	71.5418	70.9701	4321.8	-0.0131342	0.0341747	-0.384325	0.700737	0.956291	DUSP4	126.646	125.86	109.131	112.029	616.597	-0.0433753	0.0923519	-0.469674	0.638588	0.789675
ENST00000240123	SORBS3	10.4659	10.0874	8.86509	9.07706	358.746	-0.17198	0.120132	-1.43159	0.15226	0.578984	SORBS3	29.6628	33.7633	31.286	33.5209	287.245	0.145	0.134188	1.08057	0.27989	0.473883
ENST00000240185	TARDBP	24.5902	25.8072	23.7149	22.6765	1399.83	-0.0954494	0.0614379	-1.55359	0.120282	0.516807	TARDBP	160.2	166.879	153.141	147.058	857.839	0.0244312	0.0801122	0.304962	0.760395	0.870257
ENST00000240285	RDH10	9.76331	9.68032	8.16989	8.93859	389.888	-0.160544	0.116153	-1.38218	0.166916	0.605219	RDH10	57.9606	61.2953	21.2627	22.3175	181.362	-1.32957	0.175929	-7.55741	4.11e-14	6.13e-13
ENST00000240316	COIL	16.7533	16.3182	17.4227	16.1061	472.92	0.043844	0.105243	0.416599	0.676972	0.949563	COIL	21.748	18.5091	20.0526	22.6076	156.578	0.218641	0.181865	1.20222	0.229279	0.412506
ENST00000240328	TBX2	0.666509	0.666479	0.581207	0.642347	23.6507	-0.0995419	0.460057	-0.216368	0.828701	0.974458	TBX2	0.879694	0.788089	0.355234	0.475047	6.17162	-0.744467	0.953537	-0.780742	0.434954	0.628857
ENST00000240364	FAM117A	0.526312	0.526289	0.450901	0.676311	13.6896	0.122864	0.615245	0.1997	0.841715	0.976002	FAM117A	3.22619	2.78702	2.79169	2.61328	16.3751	-0.141594	0.557429	-0.254012	0.799486	0.894261
ENST00000240423	NCAPH	10.1911	9.37759	9.35207	9.36892	622.29	-0.0398649	0.0923865	-0.431502	0.666103	0.946368	NCAPH	37.0978	38.8088	32.199	32.8648	345.832	-0.0895302	0.120658	-0.742018	0.458076	0.649822
ENST00000240488	MND1	13.7224	12.8422	12.9997	12.4337	130.196	-0.038754	0.198947	-0.194795	0.845553	0.976577	MND1	28.1769	32.5039	31.256	27.6362	79.112	0.0804182	0.255582	0.314648	0.753029	0.866268
ENST00000240499	ZNF141	2.06875	1.90654	1.83345	2.11667	269.21	0.0148758	0.14208	0.1047	0.916614	0.986019	ZNF141	1.3214	2.36759	2.49014	1.24875	11.4266	0.172057	0.694964	0.247577	0.804462	0.896048
ENST00000240587	TSHZ3	0.871236	0.855065	0.622003	1.09881	47.0662	0.0194766	0.34337	0.0567219	0.954767	0.993183	TSHZ3	1.41633	1.36257	0.545941	0.860446	14.214	-0.797013	0.616904	-1.29196	0.196372	0.368782
ENST00000240617	PLBD1	0.500319	0.667062	0.857265	0.857212	15.2503	0.578562	0.58132	0.995255	0.319612	0.781674	PLBD1	13.0881	11.542	1.52457	2.14072	49.5164	-2.55276	0.394208	-6.47568	9.44e-11	1.11e-09
ENST00000240651	PYROXD1	4.09095	3.99051	3.65942	4.0715	173.667	-0.0399351	0.173252	-0.230503	0.817701	0.972026	PYROXD1	16.4241	14.028	18.2107	21.1396	115.374	0.494895	0.212264	2.3315	0.0197268	0.0616227
ENST00000240851	TFG	49.5369	50.8202	49.6714	50.8798	1032.82	0.0268315	0.0702303	0.38205	0.702424	0.956649	TFG	202.169	205.335	198.758	193.005	1056.5	0.093199	0.0718673	1.29682	0.194693	0.366666
ENST00000240922	NAA50	52.0903	52.7833	51.5109	52.6932	3444.69	0.0148021	0.0381814	0.387678	0.698254	0.956291	NAA50	249.96	278.484	240.954	246.67	569.065	0.0098713	0.0991385	0.0995707	0.920685	0.961356
ENST00000241014	MAPK8IP1	3.4563	3.85803	2.6512	2.27232	100.453	-0.546995	0.230826	-2.36973	0.0178013	0.152293	MAPK8IP1	2.74067	1.08515	2.72729	1.07036	17.5839	0.14049	0.890407	0.157782	0.874629	0.937188
ENST00000241041	PEX16	9.00619	9.00579	9.23052	8.23596	141.432	-0.0203378	0.191569	-0.106164	0.915452	0.986019	PEX16	16.2921	16.2173	22.1737	15.6409	78.9757	0.360629	0.260625	1.38371	0.166448	0.328102
ENST00000241052	CAT	33.3153	34.7762	36.3496	35.0181	861.442	0.0918373	0.07751	1.18484	0.236079	0.702652	CAT	65.7639	61.0896	63.6716	60.4906	438.187	0.110916	0.109309	1.0147	0.310247	0.509772
ENST00000241261	TNFSF10	1.48104	1.39386	1.39945	1.62327	29.8316	0.0963723	0.40869	0.235808	0.813582	0.970661	TNFSF10	0.990655	1.24804	0.600064	1.5046	4.2431	0.255688	1.16961	0.218609	0.826955	0.909709
ENST00000241416	ACVR2A	1.20682	1.19109	1.53071	1.30908	73.6692	0.268035	0.262866	1.01967	0.307887	0.772412	ACVR2A	4.47678	4.9221	1.64345	1.64831	21.809	-1.28563	0.507969	-2.53092	0.0113764	0.0390014
ENST00000241436	POLK	6.05529	5.73706	6.91098	6.67961	404.698	0.228786	0.113158	2.02182	0.0431945	0.286754	POLK	11.039	11.4481	9.59378	10.7885	122.862	2.5e-07	0.202801	1.23e-06	0.999999	0.999999
ENST00000241463	RASL11A	2.01252	1.42988	1.157	1.02082	23.3339	-0.636543	0.477424	-1.33329	0.182438	0.631551	RASL11A	5.46396	6.66619	6.27091	9.78362	22.3606	0.392762	0.479057	0.819865	0.412293	0.608591
ENST00000241502	FYTTD1	10.365	9.9398	10.9491	10.9173	765.652	0.130924	0.0818633	1.5993	0.109754	0.492733	FYTTD1	49.4596	52.4946	48.5174	46.7996	206.06	0.0461512	0.154812	0.298111	0.765619	0.873609
ENST00000242057	AHR	33.8237	33.495	34.534	35.8775	2318.33	0.0888436	0.046951	1.89226	0.0584558	0.346305	AHR	37.7512	44.0856	35.195	36.8946	427.352	-0.0502848	0.112837	-0.445642	0.655856	0.802508
ENST00000242108	EEPD1	3.00191	2.82624	2.77483	2.7521	142.458	-0.0525294	0.190136	-0.276273	0.782338	0.968264	EEPD1	10.5185	8.50554	6.81584	5.49853	58.0679	-0.512576	0.302884	-1.69232	0.0905852	0.208173
ENST00000242159	HOXA7	1.94568	2.0672	1.87527	1.35428	39.3231	-0.289284	0.361967	-0.799202	0.424173	0.851109	HOXA7	6.35419	9.14868	6.96465	10.2941	24.949	0.251542	0.458996	0.548027	0.583674	0.752068
ENST00000242257	MRM2	28.8701	29.732	29.027	30.0112	540.394	0.03474	0.0975814	0.356011	0.721833	0.960728	FTSJ2	54.8827	52.4624	52.436	50.8725	172.006	0.104151	0.169167	0.615669	0.538113	0.714466
ENST00000242261	TWIST1	3.10832	2.15568	2.38377	2.25478	43.4899	-0.158495	0.348077	-0.455344	0.648862	0.941096	TWIST1	6.54593	7.639	5.00845	2.51164	14.9285	-0.787277	0.611741	-1.28694	0.198114	0.370804
ENST00000242465	SRGN	59.0228	55.2601	66.6159	58.3285	785.115	0.152695	0.0860842	1.77379	0.0760978	0.403152	SRGN	277.053	270.793	137.669	134.865	427.019	-0.86018	0.112337	-7.6571	1.9e-14	2.89e-13
ENST00000242505	FAM149B1	2.89124	2.69637	2.88767	2.57949	162.546	-0.00741877	0.17963	-0.0413002	0.967057	0.994818	FAM149B1	3.82645	3.25391	4.49068	4.35868	30.7618	0.472667	0.403858	1.17038	0.241849	0.427129
ENST00000242576	UNG	57.215	53.2273	54.9668	58.3606	1249.4	0.0612367	0.0664416	0.921663	0.356705	0.807317	UNG	138.52	148.123	136.564	130.755	574.781	0.0387853	0.0960246	0.40391	0.686279	0.824463
ENST00000242591	IFT81	26.0537	25.294	22.3207	22.1177	806.166	-0.184462	0.0798219	-2.31091	0.0208377	0.171261	IFT81	26.252	31.4384	26.8142	27.6441	250.018	0.0835653	0.147995	0.564649	0.572312	0.742292
ENST00000242592	ACADS	9.18731	7.25282	6.32688	6.83487	148.21	-0.29686	0.195133	-1.52132	0.128179	0.533293	ACADS	23.3105	21.2803	16.7799	21.9606	114.592	-0.0239126	0.217504	-0.109941	0.912456	0.957199
ENST00000242719	RNF11	15.8174	15.4977	16.8079	16.9435	539.347	0.132122	0.0973167	1.35765	0.174575	0.620039	RNF11	21.2396	17.3072	15.3289	14.2761	34.7566	-0.252811	0.380677	-0.664108	0.506621	0.689257
ENST00000242776	DDX39A	57.334	59.7317	56.6436	61.8274	951.181	0.0412643	0.0754548	0.546875	0.584465	0.91886	DDX39A	137.557	122.211	142.753	138.818	761.531	0.246521	0.0878524	2.80608	0.00501486	0.019379
ENST00000242784	TRIR	73.4446	71.3032	68.9347	65.3466	660.958	-0.0842524	0.0886883	-0.949983	0.342121	0.799501	C19orf43	120.207	110.789	105.865	103.776	253.301	0.0183434	0.140592	0.130472	0.896193	0.948826
ENST00000242786	ADGRE5	11.9632	11.7578	10.2711	10.04	378.399	-0.199864	0.1168	-1.71117	0.0870497	0.435354	ADGRE5	24.7536	21.084	10.7027	11.747	185.911	-0.93893	0.17392	-5.39863	6.72e-08	6.17e-07
ENST00000242827	EBPL	34.2934	33.121	34.3959	35.6835	362.177	0.07997	0.119299	0.670331	0.502647	0.885612	EBPL	121.62	128.022	87.9923	77.9908	275.082	-0.45738	0.137374	-3.32944	0.000870218	0.0041434
ENST00000242839	ATP7B	1.16423	1.05271	1.11413	1.32096	82.7754	0.159447	0.249913	0.638009	0.523468	0.896879	ATP7B	0.902578	0.574525	0.287744	0.230876	10.1085	-1.5339	0.776485	-1.97544	0.0482181	0.127972
ENST00000242848	ZC3H13	8.72427	8.82581	7.87153	7.62222	713.841	-0.155754	0.084812	-1.83646	0.0662897	0.373022	ZC3H13	7.55182	7.06445	8.54209	8.06042	172.543	0.308025	0.169769	1.81437	0.0696204	0.169789
ENST00000243045	ORMDL2	17.9304	19.1033	21.5855	21.1681	434.509	0.231256	0.109293	2.11593	0.0343508	0.245921	ORMDL2	342.509	338.322	187.353	197.303	531.083	-0.659227	0.100977	-6.52849	6.64e-11	7.93e-10
ENST00000243056	HOXC13	2.0109	1.87213	1.33663	2.09393	46.4458	-0.154678	0.338932	-0.456369	0.648124	0.940862	HOXC13	6.95935	6.5889	5.36511	5.63723	26.4343	-0.115329	0.4348	-0.265245	0.790821	0.889101
ENST00000243077	LRP1	1.31425	1.28681	1.21742	1.28771	205.38	-0.0301697	0.158515	-0.190327	0.849053	0.977985	LRP1	5.55952	5.20184	2.31924	2.51219	230.189	-1.03318	0.153618	-6.72562	1.75e-11	2.2e-10
ENST00000243108	HOXC6	1.68288	1.38584	2.09903	1.97169	31.8122	0.431656	0.397103	1.08701	0.277031	0.7465	HOXC6	4.44214	4.77548	6.09894	3.95805	14.4423	0.225357	0.596171	0.378008	0.705425	0.837281
ENST00000243189	RSRP1	9.29013	6.93862	8.3275	9.43234	130.615	0.154075	0.209286	0.736195	0.461612	0.868673	RSRP1	2.87973	4.11165	2.03504	5.24845	13.4481	0.211167	0.646836	0.326461	0.744075	0.861452
ENST00000243326	RIF1	17.2392	17.4509	15.9941	16.2871	2707.74	-0.0797907	0.0430536	-1.85329	0.0638411	0.364199	RIF1	12.4435	12.6263	9.65187	9.30416	356.586	-0.268072	0.119052	-2.25172	0.0243401	0.0732095
ENST00000243344	TTC21B	4.37644	4.78369	4.40229	4.67351	266.182	0.0107085	0.140589	0.0761691	0.939285	0.990565	TTC21B	6.82186	5.70286	5.31736	5.07608	99.4666	-0.141924	0.228002	-0.62247	0.533633	0.710075
ENST00000243346	NMI	5.91779	6.31647	4.44327	6.40817	76.4456	-0.14897	0.266978	-0.557987	0.576854	0.916542	NMI	33.0966	34.2703	33.5039	34.9802	139.628	0.213778	0.187958	1.13737	0.255383	0.445123
ENST00000243389	SLC36A1	2.26525	2.63323	2.34701	2.45602	150.937	-0.0043294	0.187374	-0.0231057	0.981566	0.997753	SLC36A1	6.72543	5.45205	6.19919	3.37523	33.7407	-0.273415	0.402093	-0.679979	0.496518	0.682423
ENST00000243440	BATF3	1.95499	2.73687	3.1404	3.26581	25.0424	0.473389	0.451536	1.0484	0.294455	0.761175	BATF3	12.6036	11.0457	11.2854	3.99489	15.2815	-0.609284	0.619007	-0.984292	0.324972	0.524588
ENST00000243457	KCNJ2	6.23009	6.94223	6.9932	6.46686	387.066	0.0552226	0.118392	0.466438	0.640902	0.937899	KCNJ2	1.14088	1.14983	0.592334	0.792116	5.02617	-0.574709	1.05883	-0.542777	0.587284	0.754678
ENST00000243501	PLA2G12A	3.89882	3.67945	3.36032	3.15891	198.212	-0.193143	0.162257	-1.19036	0.233906	0.701078	PLA2G12A	3.6822	2.96888	4.90687	2.237	26.1399	0.0421615	0.447219	0.0942748	0.924891	0.964016
ENST00000243563	SNRPA	75.1915	78.5156	75.1634	73.4319	1040.5	-0.0247534	0.0703939	-0.351642	0.725107	0.961423	SNRPA	132.524	133.564	156.061	148.427	533.785	0.339694	0.0988008	3.43817	0.000585666	0.00289549
ENST00000243578	B9D2	10.5496	13.0647	11.2628	10.0107	121.796	-0.126543	0.211802	-0.597457	0.550203	0.904856	B9D2	27.8374	32.064	21.1977	22.2268	60.3301	-0.32128	0.289889	-1.10829	0.267739	0.459802
ENST00000243644	ZNF350	3.92111	4.68431	5.17271	5.08321	119.825	0.277198	0.209618	1.3224	0.186036	0.637779	ZNF350	3.00874	3.95526	5.38817	4.45044	29.4786	0.6239	0.4162	1.49904	0.133863	0.281329
ENST00000243706	HAUS3	3.86783	3.72226	3.19529	3.56879	217.36	-0.14218	0.155606	-0.913719	0.360865	0.809156	HAUS3	4.96272	6.28118	4.05466	4.7678	39.5157	-0.189819	0.360466	-0.526594	0.598476	0.761713
ENST00000243776	CHPF	2.29395	2.48276	1.76875	1.31781	64.0686	-0.605991	0.289031	-2.09663	0.0360266	0.252925	CHPF	9.788	10.2268	12.5104	12.9838	117.032	0.474843	0.206426	2.30031	0.0214308	0.0659315
ENST00000243878	ENKD1	5.11721	4.64706	4.29454	2.95232	71.6773	-0.406157	0.276525	-1.46879	0.141889	0.559149	ENKD1	3.82161	4.45976	6.57902	7.82043	26.3299	0.939572	0.443931	2.11648	0.0343039	0.0969192
ENST00000243903	ACTR5	6.48103	6.73741	6.51447	7.05004	183.91	0.0613333	0.167841	0.365425	0.714794	0.960539	ACTR5	11.1212	10.7463	8.33367	7.94041	75.6961	-0.225858	0.258185	-0.874793	0.381687	0.580424
ENST00000243918	SYS1	12.2518	11.2927	10.6632	12.2022	341.255	-0.018191	0.126766	-0.143501	0.885894	0.981867	SYS1	57.9946	60.698	42.6949	50.9519	109.26	-0.189458	0.215644	-0.878571	0.379634	0.577657
ENST00000243997	ATP5F1E	51.2723	53.1035	53.0602	55.064	2068.24	0.0749468	0.0501573	1.49424	0.135114	0.544476	ATP5E	2977.51	2886.74	3297.97	3165.14	894.055	0.292841	0.0790166	3.70607	0.000210497	0.00114883
ENST00000244007	PLCG1	8.22599	8.61217	8.16672	8.46426	476.801	0.00618478	0.104242	0.0593312	0.952688	0.993183	PLCG1	10.5657	10.7573	9.73047	9.49727	172.925	0.011266	0.16861	0.0668169	0.946727	0.974494
ENST00000244020	SRSF6	56.4128	57.5742	53.7258	51.1413	2567.21	-0.0962698	0.0452326	-2.12833	0.0333099	0.241025	SRSF6	208.174	206.75	211.263	205.005	939.78	0.146254	0.0756355	1.93367	0.0531535	0.137737
ENST00000244040	RAB22A	6.754	6.90484	6.22733	6.60324	617.585	-0.0662053	0.0917341	-0.721709	0.470473	0.871085	RAB22A	57.3967	57.4858	36.9395	30.0749	115.21	-0.642731	0.212943	-3.01833	0.0025417	0.0107179
ENST00000244050	SNAI1	1.24615	1.58158	1.66299	1.41654	27.1598	0.147119	0.431429	0.341004	0.7331	0.961608	SNAI1	5.53585	3.45386	4.47093	3.84356	15.0823	0.0931728	0.587391	0.158622	0.873967	0.936878
ENST00000244051	MOCS3	5.32323	5.06723	4.19074	4.31373	260.164	-0.264934	0.141515	-1.87213	0.0611885	0.355223	MOCS3	18.3061	14.7904	14.1126	13.9705	91.5747	-0.105109	0.237306	-0.442927	0.657819	0.803429
ENST00000244061	RNF114	22.2414	21.8731	24.8053	24.8896	619.109	0.195884	0.0907061	2.15954	0.030808	0.226206	RNF114	113.853	97.8267	119.807	119.791	340.339	0.308624	0.124052	2.48786	0.0128516	0.0431942
ENST00000244137	PEPD	41.5236	41.9502	35.1335	33.149	779.48	-0.265773	0.081791	-3.24942	0.00115641	0.017798	PEPD	157.538	159.202	168.447	162.256	1057.09	0.192458	0.0722448	2.66397	0.0077225	0.0281064
ENST00000244217	MCEE	5.95039	5.15678	5.09781	5.86213	49.0147	0.00477686	0.321002	0.0148811	0.988127	0.997979	MCEE	20.1663	25.5054	22.5143	24.9832	55.483	0.114531	0.30344	0.377443	0.705844	0.837465
ENST00000244221	PAIP2B	0.557763	0.466944	0.333381	0.433368	30.3883	-0.394353	0.411942	-0.957303	0.338414	0.796786	PAIP2B	2.2632	3.9917	4.79807	4.1248	6.32719	0.539914	0.924455	0.584035	0.559197	0.731716
ENST00000244230	MPHOSPH10	21.0339	22.6945	20.5274	18.1969	480.739	-0.151288	0.107327	-1.4096	0.158659	0.590386	MPHOSPH10	25.1395	24.8219	23.3985	24.3369	217.922	0.070032	0.150234	0.466152	0.641107	0.791483
ENST00000244289	LIPE	0.80244	0.693971	0.418053	0.501633	24.4929	-0.678264	0.46185	-1.46858	0.141947	0.559149	LIPE	0.97017	0.977787	1.25366	1.17879	15.3826	0.472324	0.573284	0.823892	0.410001	0.606436
ENST00000244426	FBXO9	7.51045	5.96866	6.93343	7.7622	346.39	0.148669	0.186139	0.798699	0.424465	0.851167	FBXO9	13.2337	15.0636	12.8255	17.0252	85.8224	0.198819	0.248539	0.799949	0.42374	0.61813
ENST00000244496	RRP36	50.0121	47.4542	52.1968	48.3767	631.634	0.0693	0.0917449	0.755355	0.450036	0.863106	RRP36	102.912	95.5961	97.9807	89.4556	331.711	0.0944586	0.123344	0.765817	0.443785	0.637234
ENST00000244519	BTN3A3	1.10059	1.18308	0.671813	1.02534	31.8324	-0.404168	0.405447	-0.996845	0.31884	0.781674	BTN3A3	1.19167	0.360308	1.01055	0.434375	5.66844	0.0476756	1.02723	0.0464117	0.962982	0.98241
ENST00000244534	H1-3	491.539	478.635	341.22	335.996	2953.24	-0.494596	0.0419567	-11.7882	4.49e-32	7.38e-30	HIST1H1D	1318.5	1310.76	885.053	915.22	3199.43	-0.405905	0.0415394	-9.77156	1.49e-22	3.49e-21
ENST00000244571	AARS2	6.38694	6.029	5.75634	5.93108	311.675	-0.0632049	0.129057	-0.489744	0.624315	0.933956	AARS2	4.30985	3.48919	4.7932	6.09507	60.6791	0.606923	0.294919	2.05793	0.0395967	0.109087
ENST00000244728	COL21A1	0.43082	0.509129	0.855621	0.654259	27.6113	0.707817	0.431725	1.63951	0.101107	0.470952	COL21A1	0.727205	0.952789	0.0880971	0.176716	6.09574	-2.09898	1.07814	-1.94685	0.0515526	0.134744
ENST00000244745	SOX4	22.6913	23.9657	20.0152	19.5179	1130.49	-0.21499	0.0681921	-3.15271	0.00161762	0.0237404	SOX4	28.1898	28.1151	12.4507	15.5202	129.621	-0.869161	0.204574	-4.24865	2.15e-05	0.000141727
ENST00000244769	ATXN1	2.48964	2.48953	1.85227	2.31768	261.289	-0.231823	0.147147	-1.57545	0.115152	0.505014	ATXN1	1.19547	1.46304	1.13791	1.03753	12.7158	-0.13719	0.635799	-0.215776	0.829162	0.911129
ENST00000244869	EREG	39.7527	40.5123	45.8743	45.0297	2130.55	0.203612	0.0485963	4.18987	2.79e-05	0.000695945	EREG	189.838	188.423	87.801	95.566	309.546	-0.885268	0.13105	-6.7552	1.43e-11	1.81e-10
ENST00000245046	EMC3	25.6015	25.9535	25.9796	26.6208	779.767	0.0530037	0.0808262	0.655774	0.511969	0.892219	EMC3	126.388	136.786	68.4808	62.8518	339.501	-0.855809	0.126337	-6.77403	1.25e-11	1.6e-10
ENST00000245105	SH3TC1	1.23442	1.44326	0.976202	0.75651	51.0664	-0.60391	0.322086	-1.875	0.060793	0.353851	SH3TC1	1.30227	0.839999	0.757266	0.949383	17.3032	-0.192889	0.553378	-0.348567	0.727415	0.850424
ENST00000245157	BBS2	12.8653	14.0262	12.3614	12.552	383.077	-0.0861742	0.117313	-0.734566	0.462604	0.869092	BBS2	25.9649	23.5421	24.2052	23.2213	232.862	0.123276	0.145849	0.84523	0.397982	0.595699
ENST00000245206	GOT2	104.537	100.347	105.405	108.001	2730.35	0.0828383	0.0437766	1.89229	0.0584518	0.346305	GOT2	258.144	259.028	262.926	262.721	1480.52	0.159742	0.0603589	2.64654	0.008132	0.0293296
ENST00000245304	RAP2A	6.38704	6.41626	6.95676	7.24066	403.407	0.173154	0.112824	1.53474	0.124849	0.526021	RAP2A	7.98614	7.66556	4.60705	7.39309	16.8111	-0.211951	0.557927	-0.379891	0.704026	0.83658
ENST00000245414	IRF1	9.03643	8.25429	9.13045	9.48445	344.102	0.130489	0.123713	1.05478	0.291528	0.758918	IRF1	23.983	25.0345	20.4936	25.4976	131.358	0.168173	0.194884	0.86294	0.38817	0.586502
ENST00000245441	NIN	14.37	14.4488	14.1407	13.742	1573.07	-0.0236035	0.0566883	-0.416373	0.677137	0.949584	NIN	5.87287	6.24781	5.0198	5.19323	154.168	-0.0895675	0.17954	-0.498872	0.61787	0.775326
ENST00000245451	BMP4	20.8635	20.7356	19.5237	20.8821	426.817	-0.017946	0.110306	-0.162692	0.870761	0.980163	BMP4	5.45832	6.87646	4.75271	4.55952	28.7305	-0.397056	0.423851	-0.936782	0.348871	0.546486
ENST00000245457	PTGER2	0.631675	0.531913	0.512685	0.555375	14.7819	-0.0995673	0.588349	-0.169232	0.865615	0.979578	PTGER2	2.13835	3.13474	1.884	4.25154	13.5204	0.318386	0.637459	0.499461	0.617454	0.775118
ENST00000245479	SOX9	1.22651	1.49669	0.988439	1.28222	52.8785	-0.238111	0.314938	-0.756058	0.449615	0.862835	SOX9	10.1177	11.7129	9.44128	11.2966	70.9293	0.0713515	0.26879	0.265455	0.790659	0.889101
ENST00000245543	ARMC7	3.8371	4.06486	3.71043	3.75902	89.109	-0.0571622	0.238694	-0.239479	0.810734	0.969983	ARMC7	12.6534	20.1918	10.6451	13.2389	38.0848	-0.307635	0.383558	-0.802056	0.422521	0.618018
ENST00000245544	NUP85	46.8168	47.4277	51.1535	52.3319	1137.37	0.158988	0.0666678	2.38478	0.0170892	0.147739	NUP85	67.2596	69.0707	66.7017	69.4771	592.03	0.144994	0.0940499	1.54167	0.123153	0.26365
ENST00000245552	NT5C	55.7792	56.6836	45.3394	44.0546	489.807	-0.307159	0.102883	-2.98553	0.00283088	0.0372456	NT5C	87.5978	82.7023	86.4062	84.1377	224.465	0.146898	0.148084	0.991988	0.321203	0.520873
ENST00000245564	MSTO1	13.4876	14.3464	12.702	14.8252	368.898	0.00807102	0.12259	0.0658376	0.947507	0.992343	MSTO1	23.0758	23.0108	22.9261	24.6258	174.052	0.193833	0.168785	1.1484	0.250804	0.439367
ENST00000245615	MBOAT7	29.4601	30.4918	23.1637	22.1095	649.945	-0.381109	0.0899009	-4.23921	2.24e-05	0.000574743	MBOAT7	83.7482	87.5263	38.5821	36.1881	377.858	-1.09407	0.120937	-9.0466	1.47e-19	2.96e-18
ENST00000245680	SLC35F5	11.3617	11.4959	11.2305	11.3622	1263.61	0.00722161	0.0631277	0.114397	0.908923	0.985351	SLC35F5	48.5691	55.6559	15.6366	16.8147	232.798	-1.48926	0.162284	-9.17687	4.44e-20	9.21e-19
ENST00000245796	PSD4	1.46261	1.53459	1.6018	1.66651	191.634	0.148974	0.163952	0.908645	0.363538	0.81102	PSD4	3.09744	1.66051	4.55077	4.40408	47.5295	1.08356	0.351571	3.08204	0.00205584	0.00890863
ENST00000245812	ALKBH7	12.0472	13.3945	6.06272	5.73758	97.0832	-1.08432	0.239773	-4.5223	6.12e-06	0.000175378	ALKBH7	37.1585	29.5159	31.6635	32.5225	95.9748	0.096777	0.232408	0.416409	0.67711	0.816949
ENST00000245816	CLPP	12.9868	12.8167	10.1529	10.9366	304.393	-0.267007	0.131082	-2.03695	0.041655	0.279828	CLPP	64.5687	62.5435	65.134	75.0952	243.71	0.277333	0.145174	1.91035	0.0560885	0.143245
ENST00000245817	TNFSF9	6.5515	7.50139	7.13382	8.09735	129.032	0.140223	0.202599	0.692121	0.488862	0.88161	TNFSF9	13.1515	14.3593	12.6131	10.3201	41.8036	-0.139157	0.349326	-0.398359	0.690365	0.82749
ENST00000245838	THOC2	24.6907	25.6673	24.0597	23.7019	1480.87	-0.0523296	0.0588541	-0.88914	0.373928	0.820392	THOC2	20.7077	23.9083	22.2813	21.3917	462.992	0.108794	0.109677	0.991956	0.321219	0.520873
ENST00000245907	C3	35.6494	37.4912	36.8787	36.0333	2059.48	0.0195265	0.0505546	0.386247	0.699314	0.956291	C3	15.6512	14.0027	18.9099	17.3896	360.002	0.427171	0.120601	3.54202	0.000397074	0.00205755
ENST00000245908	SH2D3A	4.1558	4.19144	3.68312	3.08442	92.8575	-0.278639	0.236946	-1.17596	0.239611	0.707504	SH2D3A	4.59124	4.1402	5.85479	6.60613	39.9751	0.664754	0.354937	1.87288	0.0610848	0.152947
ENST00000245923	RTN2	2.26398	2.40761	1.52396	1.33916	46.0951	-0.682286	0.335477	-2.03378	0.0419738	0.281182	RTN2	9.4494	9.52358	4.95025	4.9649	51.1765	-0.790923	0.319872	-2.47263	0.0134124	0.0445725
ENST00000245932	VASP	45.9258	47.6732	45.9499	46.556	1124.71	0.0070944	0.0674182	0.10523	0.916193	0.986019	VASP	97.431	94.3197	88.7462	96.5746	475.518	0.0860686	0.106186	0.810548	0.417625	0.613537
ENST00000245934	SYMPK	22.8299	22.6485	20.7609	20.4505	952.362	-0.118105	0.0730268	-1.61729	0.105816	0.48178	SYMPK	31.9016	32.4824	25.6765	24.4914	477.991	-0.219007	0.104314	-2.0995	0.0357731	0.100429
ENST00000245960	CDC25B	60.0225	58.884	56.6386	56.3432	2248.01	-0.0497021	0.0472797	-1.05124	0.293151	0.760673	CDC25B	162.105	164.95	130.824	142.583	1151.59	-0.12084	0.0705141	-1.7137	0.0865841	0.201029
ENST00000246024	TMX4	12.225	12.4789	11.0642	12.4916	793.804	-0.0446085	0.0836569	-0.533232	0.593873	0.923742	TMX4	35.0959	29.9451	7.73033	10.4184	93.3525	-1.72931	0.262898	-6.57788	4.77e-11	5.77e-10
ENST00000246069	DSTN	165.909	162.422	153.899	152.995	5829	-0.0733824	0.0292865	-2.50567	0.0122219	0.116067	DSTN	1980.67	1944.36	2229.33	2208.77	4545.42	0.313098	0.0344301	9.09373	9.57e-20	1.94e-18
ENST00000246071	SNRPB2	43.9607	41.1118	43.6001	42.4651	1112.34	0.0407659	0.069036	0.590502	0.554854	0.906954	SNRPB2	249.609	263.726	290.772	317.188	834.48	0.387734	0.0826516	4.69118	2.72e-06	2.05e-05
ENST00000246112	TLE6	0.826694	1.28132	0.690538	1.11542	20.8453	-0.198997	0.509444	-0.390616	0.696081	0.956201	TLE6	2.31167	2.2072	2.65308	3.40008	20.2021	0.497504	0.500728	0.993562	0.320436	0.520436
ENST00000246117	NCLN	21.0737	21.3392	13.5835	14.1248	694.398	-0.590145	0.0871669	-6.77029	1.29e-11	8.21e-10	NCLN	42.7697	33.6373	23.6604	27.6354	233.828	-0.440273	0.219006	-2.01033	0.0443967	0.119741
ENST00000246151	PITHD1	18.5024	16.4458	19.682	20.3413	321.524	0.219649	0.1288	1.70535	0.0881299	0.438799	PITHD1	38.26	40.2224	39.9568	32.0601	104.095	-0.00818495	0.22341	-0.0366364	0.970775	0.985603
ENST00000246166	FNTB	12.5999	12.6295	14.0226	13.4795	385.502	0.148471	0.115399	1.28659	0.198237	0.653385	FNTB	5.89236	5.45711	5.20902	3.48296	29.0114	-0.190473	0.421188	-0.452228	0.651105	0.79843
ENST00000246186	MMP24	20.4484	19.9433	19.4383	18.3333	921.785	-0.0727232	0.0751927	-0.967158	0.333465	0.793009	MMP24	13.7029	15.1154	6.40486	6.42382	87.7669	-1.07415	0.250321	-4.29109	1.78e-05	0.000118491
ENST00000246190	NECAB3	5.42326	6.45011	4.54061	4.85711	113.938	-0.313283	0.216648	-1.44604	0.148165	0.572597	NECAB3	6.85391	5.31363	5.32253	5.76535	30.8901	0.0775289	0.403461	0.19216	0.847617	0.922404
ENST00000246194	RALY	18.6376	18.7289	16.3616	17.5606	1193.49	-0.115473	0.0664301	-1.73827	0.0821639	0.422572	RALY	157.154	162.514	170.271	157.787	656.407	0.172103	0.0919702	1.8713	0.0613042	0.153403
ENST00000246229	PLAGL2	3.5109	3.53964	3.9362	3.84313	226.201	0.16595	0.150498	1.10267	0.270169	0.73949	PLAGL2	7.57672	9.33313	8.83884	8.35355	55.5492	0.140498	0.301134	0.466564	0.640812	0.791212
ENST00000246337	UROD	27.0569	24.1789	29.9288	25.1739	342.085	0.12898	0.129723	0.994273	0.32009	0.781674	UROD	48.7344	54.4683	64.0932	60.1355	276.737	0.388216	0.1356	2.86296	0.00419709	0.0166233
ENST00000246532	IGFLR1	5.40822	5.25914	3.76192	5.03684	86.3578	-0.253779	0.24913	-1.01866	0.308365	0.772962	IGFLR1	6.46926	7.50793	5.93725	6.19301	29.9611	-0.0524379	0.408639	-0.128323	0.897893	0.94931
ENST00000246535	PDCD2L	24.7204	25.355	22.4189	21.51	293.031	-0.164896	0.132863	-1.24109	0.214571	0.673431	PDCD2L	39.2679	37.6169	41.919	45.3498	193.627	0.339319	0.160112	2.11927	0.0340681	0.0964069
ENST00000246548	UBA2	107.673	104.648	115.556	110.593	4735.09	0.115056	0.033827	3.4013	0.00067066	0.0112642	UBA2	175.615	183.35	141.613	153.923	1375.72	-0.143027	0.0654305	-2.18593	0.0288204	0.0842908
ENST00000246672	NR1D1	0.807866	0.932112	0.918381	1.15789	27.0758	0.278995	0.431617	0.646395	0.518023	0.894342	NR1D1	5.1005	5.48325	8.23866	8.12532	54.649	0.722697	0.303813	2.37876	0.0173712	0.0552534
ENST00000246747	ARL2.00	81.6311	86.099	73.6907	74.4749	793.241	-0.154885	0.0810164	-1.91177	0.0559056	0.338011	ARL2	355.532	360.229	404.591	387.866	926.56	0.270985	0.0763107	3.55108	0.000383654	0.00199375
ENST00000246792	RRAS	26.2727	26.2715	24.9224	25.0274	272.367	-0.0490137	0.137229	-0.357168	0.720966	0.960728	RRAS	157.703	147.68	143.48	122.183	409.494	-0.0532717	0.11656	-0.457034	0.647647	0.795889
ENST00000246802	NOP53	55.3123	55.5815	33.3059	34.4908	723.015	-0.68585	0.0856549	-8.00713	1.17e-15	1.01e-13	GLTSCR2	50.3752	55.9065	101.947	92.6958	480.542	1.00789	0.107971	9.33481	1.01e-20	2.19e-19
ENST00000246868	SBDS	59.8325	59.5766	52.9957	57.2892	998.419	-0.0906339	0.0727835	-1.24525	0.213039	0.671698	SBDS	108.844	108.857	132.196	121.088	389.021	0.341399	0.114962	2.96968	0.00298112	0.0123771
ENST00000246912	MLX	19.7503	18.5486	18.8426	20.1814	539.07	0.0510939	0.0992011	0.515054	0.606515	0.927308	MLX	61.1863	60.2544	59.9782	70.3708	247.641	0.213202	0.14373	1.48335	0.137982	0.287159
ENST00000246957	TRAP1	74.7342	76.0543	70.4351	73.5957	1766.38	-0.0421058	0.0540092	-0.779604	0.435624	0.855335	TRAP1	83.3343	87.1767	91.7339	91.645	816.203	0.269601	0.0809742	3.32947	0.000870125	0.0041434
ENST00000247001	SUGP1	8.08907	6.84675	6.95734	7.40707	202.644	-0.0322574	0.163889	-0.196824	0.843965	0.976002	SUGP1	12.7318	11.5269	10.1955	11.5367	99.3656	0.0290359	0.226379	0.128263	0.897941	0.94931
ENST00000247003	DDX49	22.7883	22.6505	21.4364	18.7411	413.603	-0.153511	0.114477	-1.34098	0.179927	0.628669	DDX49	24.6387	25.5582	29.8485	23.2842	167.629	0.201753	0.179734	1.12251	0.261647	0.452856
ENST00000247020	SDF2	42.9507	41.0136	48.2956	49.9773	643.478	0.251052	0.0897014	2.79875	0.00513007	0.0592722	SDF2	162.605	173.189	74.3197	75.7419	331.05	-0.99801	0.127859	-7.80552	5.93e-15	9.3e-14
ENST00000247026	NSRP1	13.3372	13.7605	10.183	11.5233	329.388	-0.296005	0.127691	-2.31814	0.0204416	0.169244	NSRP1	18.0843	16.8436	19.0375	18.0331	133.795	0.236832	0.193431	1.22438	0.220809	0.401704
ENST00000247178	ATG14	5.40748	5.54588	5.41222	5.67915	280.208	0.042108	0.135612	0.310504	0.756178	0.965609	ATG14	9.47717	7.84084	4.79807	4.98413	43.6393	-0.646238	0.345534	-1.87026	0.0614479	0.153638
ENST00000247191	DLGAP5	41.2423	42.6303	43.012	41.8795	1310.73	0.041461	0.0624678	0.663718	0.506871	0.889469	DLGAP5	28.7094	30.9246	41.6562	39.1807	390.303	0.55795	0.115445	4.83305	1.34e-06	1.05e-05
ENST00000247194	L3HYPDH	14.9854	17.9493	12.4688	13.2992	239.652	-0.329958	0.153352	-2.15163	0.0314262	0.230197	L3HYPDH	30.6683	38.8345	30.0083	33.4412	155.648	0.0017778	0.184999	0.00960982	0.992333	0.997327
ENST00000247225	SGPP1	14.6976	13.9376	11.8677	14.2278	491.999	-0.109949	0.108981	-1.00888	0.31303	0.777274	SGPP1	30.6148	27.6742	14.9118	13.0385	122.41	-0.931962	0.211328	-4.41003	1.03e-05	7.15e-05
ENST00000247461	CANX	305.194	303.618	321.989	320.068	16576.9	0.10074	0.0168308	5.98547	2.16e-09	1.12e-07	CANX	496.912	491.927	164.203	160.404	2508.98	-1.46975	0.0498414	-29.4886	4.03e-191	1.51e-188
ENST00000247665	PHPT1	119.958	108.057	96.0968	94.4531	650.562	-0.234935	0.0919778	-2.55425	0.0106416	0.105068	PHPT1	694.822	680.076	600.28	618.968	1064.51	-0.0417274	0.0712588	-0.585576	0.55816	0.730787
ENST00000247668	TRAF2	16.048	15.1458	12.1421	14.134	350.805	-0.223472	0.125455	-1.7813	0.074864	0.399534	TRAF2	28.0597	32.34	26.7567	28.0174	188.33	-0.00449897	0.165623	-0.0271638	0.978329	0.990726
ENST00000247706	ABHD8	2.36112	2.72117	1.85139	1.38846	45.7247	-0.625514	0.340199	-1.83867	0.065964	0.372357	ABHD8	3.96319	3.19544	2.68867	3.08186	18.2405	-0.240178	0.527971	-0.454909	0.649175	0.797243
ENST00000247815	HELB	2.52791	2.64212	2.47315	2.74233	360.212	0.0366793	0.121336	0.302295	0.762427	0.96617	HELB	3.52129	3.48441	2.7922	2.95604	44.6759	-0.166526	0.334706	-0.49753	0.618815	0.77604
ENST00000247843	YEATS4	27.4437	28.7228	26.1822	25.8945	428.212	-0.0850287	0.109878	-0.773845	0.439022	0.857457	YEATS4	80.0173	84.0443	75.3952	81.2059	236.328	0.0582766	0.145317	0.401031	0.688397	0.82609
ENST00000247930	ZNF777	5.97691	5.74479	5.8268	5.4954	197.014	-0.0259974	0.162019	-0.16046	0.872519	0.980217	ZNF777	8.37467	9.53768	7.4062	8.34391	92.2593	-0.0170655	0.235084	-0.0725935	0.94213	0.972296
ENST00000247933	IDUA	0.971952	1.27096	0.480398	0.528405	19.1006	-1.12865	0.540536	-2.08802	0.0367964	0.25684	IDUA	2.45123	2.90012	0.516441	0.388477	13.2647	-2.24772	0.729981	-3.07914	0.00207596	0.00898012
ENST00000247956	ZNF317	11.9274	11.7455	14.991	13.9545	575.797	0.314135	0.0952618	3.2976	0.000975164	0.0154522	ZNF317	11.9303	11.7882	7.79326	11.085	81.539	-0.170375	0.258618	-0.658792	0.510029	0.691557
ENST00000247970	PIN1	36.1464	38.7676	29.4927	30.6494	362.646	-0.29281	0.120677	-2.42639	0.0152497	0.136506	PIN1	87.0987	91.6552	123.101	95.4524	215.116	0.428077	0.161979	2.6428	0.00822239	0.0295835
ENST00000247977	FBXL12	4.93017	4.10103	4.37329	4.42908	90.034	-0.0130109	0.240479	-0.0541041	0.956852	0.993183	FBXL12	7.89865	9.25158	9.56881	9.33774	39.5974	0.224986	0.35423	0.63514	0.525337	0.703079
ENST00000247986	KIF17	0.432374	0.308825	0.238129	0.3704	14.4298	-0.260513	0.606983	-0.429193	0.667783	0.947127	KIF17	0.202897	0.340816	0.245799	0.328701	3.73896	0.231872	1.23492	0.187763	0.851062	0.924734
ENST00000248071	KLF2	0.971878	1.37677	0.988743	1.40497	25.7998	0.0515264	0.450586	0.114354	0.908957	0.985351	KLF2	4.31284	6.52005	8.07466	8.09855	32.0021	0.60801	0.402344	1.51117	0.130745	0.276369
ENST00000248089	HCFC1R1	43.9503	47.1661	44.1824	40.3711	456.833	-0.0838042	0.108486	-0.77249	0.439824	0.857905	HCFC1R1	201.216	203.812	211.994	204.656	376.688	0.207366	0.115442	1.79628	0.0724506	0.175242
ENST00000248114	GFER	8.70745	9.29445	8.39231	7.94779	218.852	-0.11569	0.154315	-0.749697	0.453437	0.865472	GFER	35.985	25.3188	22.6195	31.761	78.0815	0.0136295	0.274889	0.049582	0.960456	0.981287
ENST00000248121	SYNGR3	2.70245	2.13766	1.65868	1.71041	44.7683	-0.498675	0.341029	-1.46227	0.143668	0.562265	SYNGR3	11.8522	6.43204	2.57713	5.16951	19.3646	-1.13542	0.558426	-2.03325	0.0420276	0.114674
ENST00000248142	WDR24	2.69142	2.39556	1.90038	2.09029	67.5451	-0.326151	0.27581	-1.18252	0.236998	0.703961	WDR24	2.79887	2.66837	2.93248	1.83823	31.6737	-0.049325	0.408736	-0.120677	0.903947	0.952733
ENST00000248211	ZNF10	0.556414	0.90877	0.929546	0.738825	37.2366	0.21144	0.381558	0.55415	0.579476	0.917201	ZNF10	0.364364	0.856857	0.588544	1.033	5.32466	0.561844	1.037	0.541797	0.587958	0.755076
ENST00000248244	TICAM1	0.916129	0.855016	0.510162	0.824058	22.3753	-0.384628	0.484249	-0.794277	0.427034	0.851735	TICAM1	2.63908	3.34938	9.3545	9.14466	58.019	1.74669	0.314646	5.55128	2.84e-08	2.71e-07
ENST00000248248	MON1B	7.87244	8.22353	7.60559	7.5148	489.034	-0.0661613	0.102758	-0.643857	0.519668	0.895496	MON1B	18.8297	20.7727	14.7964	14.5311	120.949	-0.271921	0.203709	-1.33485	0.181926	0.349818
ENST00000248306	METTL25	3.24658	2.73176	3.05276	3.2052	68.0957	0.0899689	0.273797	0.328597	0.74246	0.961898	METTL25	3.69319	2.90796	2.51668	2.3839	18.0922	-0.404787	0.532505	-0.760156	0.447161	0.640375
ENST00000248342	EIF3K	476.657	448.481	488.755	489.405	3961.85	0.104431	0.037608	2.77684	0.00548905	0.0625985	EIF3K	1104.24	1105.83	1240.27	1251.7	3398.12	0.314776	0.0397965	7.90964	2.58e-15	4.16e-14
ENST00000248437	TUBA4A	64.4497	63.41	69.4462	67.1357	1461.04	0.119238	0.058994	2.0212	0.0432594	0.286761	TUBA4A	229.752	227.328	245.399	250.844	1422.26	0.246355	0.0617559	3.98917	6.63e-05	0.000397416
ENST00000248553	HSPB1	172.272	178.154	159.888	153.256	1389.23	-0.138246	0.0611579	-2.26048	0.0237913	0.189779	HSPB1	951.225	969.983	1002.66	1011.4	2673.12	0.20658	0.0450053	4.59012	4.43e-06	3.26e-05
ENST00000248564	GNG11	35.4593	35.3765	28.9061	28.626	1043.8	-0.276074	0.069851	-3.95233	7.74e-05	0.00171295	GNG11	453.788	436.213	470.051	479.55	449.274	0.237644	0.106669	2.22788	0.0258889	0.0770656
ENST00000248594	PTPN12	11.4464	10.9388	12.6614	11.9159	428.57	0.158803	0.110277	1.44004	0.149856	0.575881	PTPN12	37.295	37.4079	25.2927	28.5114	328.486	-0.338501	0.125203	-2.70362	0.00685884	0.0254566
ENST00000248600	STYXL1	19.0581	17.729	17.5891	19.3691	281.302	0.0307275	0.137216	0.223934	0.822808	0.972912	STYXL1	34.9079	33.6134	49.5618	40.7934	167.264	0.54293	0.175658	3.09084	0.00199594	0.00867336
ENST00000248633	PEX1	8.60394	8.56616	9.254	9.18133	419.467	0.126613	0.110365	1.14722	0.251292	0.718943	PEX1	7.2143	6.99759	7.95119	6.59068	122.214	0.178084	0.204616	0.870331	0.38412	0.582695
ENST00000248668	LRFN1	1.6919	1.88518	1.11817	0.714344	49.1703	-0.940929	0.33748	-2.78811	0.00530171	0.0607995	LRFN1	2.34686	2.54723	0.32805	1.09674	16.2118	-1.73199	0.634298	-2.73057	0.00632258	0.0237221
ENST00000248846	TUBGCP6	4.29744	3.83924	2.80455	3.1506	230.137	-0.426271	0.154373	-2.7613	0.00575722	0.064936	TUBGCP6	0.99474	0.886871	1.62222	1.39459	29.6918	0.77515	0.414742	1.86899	0.0616238	0.154016
ENST00000248879	DGCR6L	17.7801	18.5463	14.5157	16.2172	211.717	-0.217183	0.157853	-1.37586	0.168866	0.608709	DGCR6L	9.80636	9.56453	9.58056	8.07149	26.8662	0.025227	0.433702	0.0581667	0.953616	0.977879
ENST00000248929	SGSM3	5.66503	5.96581	4.783	4.60687	169.052	-0.284736	0.175495	-1.62248	0.104701	0.480014	SGSM3	8.17655	7.58522	9.79289	10.8379	89.9302	0.506345	0.237198	2.13469	0.0327861	0.0932478
ENST00000248958	SDF2L1	16.74	20.8002	12.3472	12.0919	137.593	-0.595178	0.202278	-2.94237	0.0032571	0.0415238	SDF2L1	62.0359	60.3013	35.0969	42.8531	142.738	-0.524097	0.191051	-2.74323	0.00608383	0.0229654
ENST00000248975	YWHAH	69.0246	72.1016	74.7879	70.7653	1353.34	0.0686008	0.0625154	1.09734	0.272492	0.741213	YWHAH	233.676	215.837	196.721	200.74	785.64	-0.0661391	0.0833212	-0.793785	0.427321	0.621079
ENST00000249014	CDC42EP1	7.64686	8.48346	7.82234	6.9419	178.823	-0.103625	0.172681	-0.600096	0.548442	0.904508	CDC42EP1	13.1712	10.4044	37.9498	34.6019	125.511	1.72148	0.213804	8.05165	8.17e-16	1.36e-14
ENST00000249064	CCDC117	9.37993	10.3072	9.35173	10.5432	422.981	0.0392128	0.114473	0.342551	0.731936	0.961608	CCDC117	17.9596	14.3297	10.2742	8.78923	46.0762	-0.61977	0.33869	-1.8299	0.0672646	0.165116
ENST00000249075	LIF	25.6493	26.3025	29.6787	30.979	1175.84	0.247562	0.0661257	3.74381	0.000181249	0.00368111	LIF	16.8816	17.3614	10.0169	7.1163	34.1568	-0.918044	0.397551	-2.30925	0.0209299	0.0646474
ENST00000249299	LSM8.00	4.09781	4.11743	3.98555	4.08706	543.706	-0.00122938	0.0970156	-0.012672	0.989889	0.998282	LSM8	305.197	273.984	302.107	305.643	375.642	0.180414	0.117979	1.52921	0.126212	0.268917
ENST00000249330	VGF	0.768816	0.928945	0.452828	0.246982	16.4297	-1.25457	0.594471	-2.11039	0.0348247	0.247874	VGF	0.792122	0.456194	0.274175	0	3.22494	-1.44881	1.43603	-1.0089	0.313025	0.512565
ENST00000249344	STRIP2	2.6196	2.50768	2.87375	2.95567	151.187	0.209194	0.184224	1.13554	0.256148	0.724874	STRIP2	6.34186	6.39165	6.57084	6.38751	70.6381	0.201051	0.265649	0.756829	0.449152	0.642113
ENST00000249356	DNAJB9	6.44523	6.61455	5.66706	5.75389	158.887	-0.169406	0.180116	-0.940538	0.346942	0.800145	DNAJB9	36.5132	39.0016	29.4892	22.372	93.2034	-0.388437	0.238041	-1.6318	0.102721	0.229506
ENST00000249373	SMO	7.68489	7.31471	7.20872	6.52178	307.896	-0.103515	0.131069	-0.78978	0.429656	0.852829	SMO	5.21731	3.74317	8.46303	8.91785	68.468	1.04702	0.280497	3.73272	0.00018942	0.00104718
ENST00000249396	SIRT2	14.7462	15.4039	17.8221	17.821	330.47	0.265501	0.124721	2.12877	0.0332735	0.241008	SIRT2	14.6701	21.637	19.5059	24.3459	104.69	0.376276	0.234154	1.60696	0.108063	0.238815
ENST00000249442	MTX2	24.0098	20.8401	19.8127	21.9257	312.921	-0.0797056	0.133497	-0.597061	0.550467	0.905014	MTX2	87.0581	90.4085	98.4139	93.5608	321.958	0.268235	0.125021	2.14551	0.0319119	0.0912011
ENST00000249647	SNAP23	13.4075	16.343	15.0476	15.0467	372.67	0.0406363	0.125113	0.324797	0.745335	0.962871	SNAP23	71.2427	84.4338	80.3133	70.1314	212.41	0.107291	0.158973	0.674903	0.499738	0.684721
ENST00000249700	TMOD2	0.544792	0.526906	0.550898	0.734486	58.1836	0.286354	0.298437	0.959511	0.337301	0.795685	TMOD2	2.97408	2.19812	2.16177	2.16816	10.2692	-0.131029	0.71197	-0.184038	0.853984	0.925311
ENST00000249776	KNSTRN	29.1785	29.3679	30.4506	31.3678	556.263	0.102499	0.0958939	1.06888	0.285125	0.752936	KNSTRN	59.6831	53.2708	85.9097	85.6288	297.215	0.688299	0.131959	5.21602	1.83e-07	1.6e-06
ENST00000249861	THAP10	5.10992	5.948	5.438	5.69416	122.449	0.0337137	0.206985	0.16288	0.870613	0.980163	THAP10	12.7272	8.73337	12.794	12.8318	40.4552	0.407661	0.358494	1.13715	0.255477	0.445224
ENST00000249910	MBD4	15.3843	17.8979	16.4112	15.9851	437.258	-0.014865	0.11338	-0.131108	0.89569	0.983978	MBD4	17.9983	16.0838	19.4783	21.1396	142.518	0.374491	0.187951	1.99249	0.0463173	0.123936
ENST00000249923	COPB1	78.5026	76.5273	79.6134	81.9917	2971.74	0.0839641	0.0415701	2.01982	0.0434024	0.28736	COPB1	83.5415	87.2149	79.2663	81.1867	1041.91	0.0408515	0.0733024	0.557301	0.577322	0.747225
ENST00000250076	ZNF232	3.75029	3.2251	3.66275	3.22881	81.4498	0.00656644	0.252145	0.0260424	0.979224	0.997329	ZNF232	2.82136	2.36959	4.36735	3.04715	18.5434	0.623125	0.526389	1.18377	0.236504	0.420446
ENST00000250092	CD68	16.7272	15.4324	16.4452	16.7521	300.432	0.069843	0.131742	0.530152	0.596007	0.923742	CD68	56.2253	51.5152	13.8133	13.6153	152.201	-1.8761	0.20379	-9.20606	3.38e-20	7.07e-19
ENST00000250101	TXNDC17	50.1737	49.8305	51.1105	49.5189	1036.83	0.0330274	0.0700055	0.471783	0.637082	0.936651	TXNDC17	682.356	618.714	604.557	695.716	1076.18	0.105615	0.117972	0.895257	0.37065	0.568104
ENST00000250113	FXR2	24.5402	24.3477	25.1023	26.507	809.393	0.102195	0.0798564	1.27973	0.200639	0.655574	FXR2	27.4031	26.7845	29.314	28.1443	247.129	0.23285	0.140947	1.65204	0.0985265	0.222057
ENST00000250237	QTRT1	15.6797	16.6013	10.2723	11.2989	192.61	-0.557523	0.166772	-3.34303	0.000828689	0.0134955	QTRT1	23.4857	25.9326	27.824	28.1162	140.376	0.316873	0.188818	1.67819	0.0933103	0.213143
ENST00000250340	CLEC11A	3.09045	2.8526	1.06924	1.29829	30.6938	-1.30379	0.427736	-3.04811	0.00230286	0.0316849	CLEC11A	4.74012	5.86309	6.52546	4.18865	23.7103	0.0616366	0.472327	0.130496	0.896174	0.948826
ENST00000250405	BCL2L2	8.74991	8.27352	8.73911	8.91334	337.032	0.076379	0.123865	0.616633	0.537477	0.901499	BCL2L2	0	2.90735	1.3105	0.876253	3.16551	-0.257876	2.15302	-0.119774	0.904662	0.952908
ENST00000250416	PARP2	14.4719	13.1715	11.9158	12.8616	266.393	-0.13388	0.14133	-0.947289	0.343492	0.79988	PARP2	19.8157	24.7836	25.1625	26.2523	185.467	0.34676	0.169574	2.04488	0.0408662	0.112034
ENST00000250448	FOXA1	2.63158	2.60818	1.94527	1.7656	84.5452	-0.473709	0.24752	-1.91382	0.0556429	0.337083	FOXA1	19.0203	16.6434	12.6821	14.3319	98.5991	-0.27008	0.228031	-1.1844	0.236253	0.420296
ENST00000250454	EAPP	30.2917	28.9734	34.4139	32.9612	445.061	0.209062	0.107878	1.93794	0.0526302	0.325225	EAPP	80.3378	73.5854	104.129	104.734	345.43	0.586345	0.121072	4.84295	1.28e-06	1e-05
ENST00000250457	EGLN3	5.04325	5.70738	4.46294	3.84177	138.85	-0.348373	0.197275	-1.76593	0.0774075	0.406423	EGLN3	38.7278	43.7274	41.2726	47.7631	137.866	0.278446	0.193299	1.44049	0.149728	0.304296
ENST00000250495	NEDD8	247.809	248.462	280.267	279.398	1754.31	0.197472	0.0533208	3.70347	0.000212667	0.00423547	NEDD8	817.08	797.517	686.962	788.168	827.277	0.0297136	0.0847069	0.350782	0.725752	0.849522
ENST00000250498	DAD1	169.889	161.519	180.705	188.831	1293.03	0.181144	0.0638225	2.83825	0.00453612	0.0539781	DAD1	1177.55	1177.48	960.227	978.782	1584.05	-0.162458	0.0586321	-2.7708	0.00559191	0.0213492
ENST00000250559	RAP1B	10.6592	10.8603	10.9741	10.9498	1566.82	0.0508947	0.0566256	0.898794	0.368762	0.816323	RAP1B	416.427	428.844	375.266	377.296	141.035	0.266375	0.194513	1.36944	0.17086	0.334406
ENST00000250896	MKNK2	17.9071	18.9456	15.9999	17.2788	713.182	-0.123121	0.0867728	-1.41889	0.155932	0.585248	MKNK2	29.0347	24.285	19.944	23.8218	149.027	-0.183098	0.18969	-0.965251	0.334419	0.533233
ENST00000250916	KLF16	3.7465	4.36603	3.47516	3.29396	116.289	-0.237129	0.213213	-1.11217	0.266064	0.734323	KLF16	23.474	23.6583	18.7353	17.7841	68.8787	-0.228307	0.270632	-0.843607	0.398889	0.596624
ENST00000250974	ABHD17A	12.5837	13.7362	4.76755	4.12303	154.074	-1.54176	0.199403	-7.73189	1.06e-14	8.43e-13	ABHD17A	5.97618	4.85733	9.8088	9.36935	36.1709	0.967482	0.378589	2.5555	0.0106036	0.0367977
ENST00000251038	ZC3H14	6.95507	7.16634	6.95934	7.58366	1402.87	0.0664886	0.0625181	1.06351	0.28755	0.755685	ZC3H14	48.2238	45.934	45.9346	49.4023	462.093	0.136318	0.106053	1.28537	0.198662	0.371337
ENST00000251047	LMAN1	38.8096	38.6893	38.6187	39.3347	2021.56	0.0324723	0.0497815	0.652296	0.51421	0.892487	LMAN1	114.898	117.037	31.4092	31.9996	482.901	-1.72452	0.113645	-15.1746	5.21e-52	3.02e-50
ENST00000251089	ANGEL1	5.33849	5.21077	5.775	5.63131	303.603	0.136723	0.129981	1.05187	0.292861	0.760466	ANGEL1	8.30968	8.79366	5.28504	5.6793	61.25	-0.499123	0.289829	-1.72212	0.0850469	0.198017
ENST00000251108	CDADC1	1.13431	0.965329	1.24058	1.2405	41.8406	0.264844	0.345536	0.766472	0.443396	0.859308	CDADC1	1.76015	1.91043	1.9683	1.48059	12.143	0.129354	0.648854	0.199357	0.841983	0.919312
ENST00000251127	NALCN	2.75483	3.16498	3.38952	3.13323	233.908	0.163981	0.151746	1.08063	0.279864	0.749709	NALCN	1.64174	1.97748	1.35826	0.729791	32.2336	-0.624036	0.413441	-1.50937	0.131204	0.277146
ENST00000251143	VPS35L	18.0058	18.5716	18.6621	20.2251	792.358	0.112388	0.0818384	1.37329	0.169663	0.611043	C16orf62	33.6722	32.9364	29.8127	27.8914	431.56	-0.0668218	0.110328	-0.605666	0.544737	0.719765
ENST00000251203	PBX4	0.710598	1.2025	0.632197	1.0536	14.4958	-0.158341	0.613253	-0.258198	0.796254	0.968264	PBX4	0.186079	0.18754	1.35255	0.904368	3.31217	2.74658	1.54444	1.77836	0.0753445	0.180556
ENST00000251241	DHX40	45.5568	46.8348	48.674	44.412	1787.52	0.0348392	0.0562446	0.619423	0.535638	0.900252	DHX40	68.6108	62.2165	59.3085	55.4677	624.425	-0.0419657	0.0950694	-0.441421	0.658908	0.80402
ENST00000251250	DTWD1	1.45333	1.55411	1.67707	1.57787	232.634	0.138138	0.149513	0.923919	0.355528	0.805708	DTWD1	9.6149	10.3826	13.3119	14.7421	53.9155	0.547104	0.304576	1.79628	0.0724501	0.175242
ENST00000251268	MEGF8	8.06401	8.30579	5.89336	6.24186	854.717	-0.407791	0.0786154	-5.18716	2.14e-07	8.2e-06	MEGF8	3.57141	3.10637	1.27427	0.861931	81.1019	-1.45987	0.274559	-5.31716	1.05e-07	9.46e-07
ENST00000251269	ZNF221	1.09603	1.41833	1.32563	1.57409	37.0192	0.229804	0.370975	0.61946	0.535613	0.900252	ZNF221	0.676761	0.682074	0.683217	0.274095	4.80983	-0.468964	1.09457	-0.428447	0.668326	0.811992
ENST00000251287	HCN2	3.84699	3.17781	2.82496	2.42564	113.035	-0.395974	0.220331	-1.79718	0.0723068	0.391186	HCN2	10.8813	9.94109	3.22441	3.32907	78.8169	-1.53831	0.273061	-5.63359	1.76e-08	1.74e-07
ENST00000251363	CERS4	1.69865	0.964055	0.707966	0.884903	20.3781	-0.71729	0.524658	-1.36716	0.171576	0.614701	CERS4	3.88593	3.20436	1.28389	1.50231	13.0567	-1.15973	0.654946	-1.77072	0.0766075	0.182869
ENST00000251412	TUBG2	13.5739	15.0866	15.0863	15.7925	286.098	0.131609	0.135941	0.96813	0.332979	0.792618	TUBG2	4.78359	4.97667	8.03832	5.81222	36.8761	0.64416	0.373879	1.72291	0.0849047	0.19776
ENST00000251413	TUBG1	80.0925	79.7841	87.9696	82.8705	1433.94	0.119722	0.0602475	1.98717	0.046904	0.302799	TUBG1	105.856	101.711	100.199	105.745	615.553	0.112929	0.09329	1.21052	0.226081	0.408715
ENST00000251496	NCAPG	23.7122	21.6624	23.2832	23.4421	1138.98	0.0663455	0.0693455	0.956738	0.3387	0.797141	NCAPG	25.7805	26.8812	21.5964	22.9932	333.485	-0.0957021	0.123768	-0.773238	0.439382	0.633039
ENST00000251507	RABGAP1L	6.6807	6.31397	6.08572	6.23024	197.755	-0.053358	0.161679	-0.330023	0.741382	0.961733	RABGAP1L	7.94135	6.97096	6.62058	7.05518	77.6594	0.0289562	0.254968	0.113568	0.90958	0.955792
ENST00000251588	CIAO3	10.4928	10.6093	9.4739	9.97456	228.931	-0.093687	0.150166	-0.62389	0.5327	0.899494	NARFL	17.3984	20.1873	10.6272	16.6985	102.512	-0.320836	0.238422	-1.34567	0.17841	0.345416
ENST00000251607	TRNT1	16.0026	17.5985	15.0155	14.1286	380.679	-0.181264	0.118772	-1.52614	0.126974	0.531525	TRNT1	22.7702	25.05	18.4547	19.2887	124.492	-0.171819	0.201441	-0.852952	0.393686	0.59213
ENST00000251691	ARFGEF3	0.71495	0.747914	0.636069	0.734968	113.482	-0.0694757	0.21415	-0.324426	0.745616	0.962871	ARFGEF3	3.96399	3.93067	2.82708	2.7966	94.9422	-0.327624	0.230698	-1.42014	0.155566	0.313536
ENST00000251775	SNX4	14.5415	14.2806	13.8794	12.2482	371.944	-0.117578	0.120061	-0.97932	0.327422	0.788488	SNX4	30.3119	21.3537	29.9765	33.2596	171.829	0.400405	0.184374	2.1717	0.0298781	0.086729
ENST00000251810	RRM2B	19.9247	19.8896	18.1697	18.6085	985.366	-0.0903943	0.0718088	-1.25882	0.208095	0.664439	RRM2B	46.7922	49.1579	38.4314	42.1588	206.255	-0.101614	0.155825	-0.652102	0.514335	0.694088
ENST00000251900	SCML2	3.9269	4.02489	3.86047	4.51622	183.238	0.0991531	0.170209	0.582537	0.560205	0.908828	SCML2	5.56748	7.61519	5.41986	4.71111	54.4584	-0.165859	0.311507	-0.532441	0.594421	0.758623
ENST00000251968	TSG101	38.7285	41.3903	41.2119	43.6052	682.203	0.106265	0.0881963	1.20487	0.228255	0.692914	TSG101	120.629	120.137	125.815	124.236	632.806	0.202296	0.0910439	2.22196	0.0262859	0.0780221
ENST00000251993	KIAA0930	34.9923	33.0702	30.12	30.4652	943.87	-0.143864	0.0744369	-1.9327	0.0532736	0.327701	KIAA0930	26.2039	28.4675	25.3545	27.7037	144.366	0.112039	0.186141	0.601903	0.547239	0.721787
ENST00000252011	DHX35	5.49888	4.8822	4.94337	5.83029	189.019	0.077586	0.169988	0.45642	0.648088	0.940862	DHX35	5.84071	7.78224	7.07571	4.69101	58.9117	-0.061129	0.306443	-0.199479	0.841888	0.919312
ENST00000252015	TRPC4AP	32.5376	31.735	32.4145	34.1726	1115.59	0.0750757	0.0681773	1.10118	0.270816	0.739515	TRPC4AP	66.1008	62.5715	57.017	64.9307	663.019	0.0590301	0.0934695	0.631544	0.527685	0.705306
ENST00000252032	C20orf194	2.42694	2.11753	2.20151	2.38482	169.081	0.037255	0.177364	0.210048	0.83363	0.975453	C20orf194	2.83814	3.69471	1.71913	3.01738	44.8311	-0.324234	0.353699	-0.916697	0.359301	0.557748
ENST00000252050	CUL9	3.12804	3.05418	2.82873	3.03156	251.825	-0.0531128	0.143488	-0.370155	0.711267	0.959656	CUL9	1.68661	1.89492	1.20585	1.44458	51.2818	-0.355559	0.316444	-1.12361	0.261179	0.452422
ENST00000252100	TMCO6	5.56971	5.39124	5.66874	5.38212	108.828	0.0358166	0.216532	0.16541	0.868621	0.979578	TMCO6	8.92583	6.60636	6.58928	7.45605	48.9103	-0.0274361	0.329305	-0.0833154	0.933601	0.969028
ENST00000252102	NDUFA2	57.4267	51.9359	59.6913	62.6916	502.511	0.186312	0.103549	1.79926	0.0719769	0.390207	NDUFA2	550.422	519.319	472.641	503.08	670.728	0.0101857	0.0905578	0.112477	0.910445	0.955972
ENST00000252137	ESS2	2.30258	2.04326	2.01839	2.05745	121.63	-0.0685137	0.206755	-0.331377	0.74036	0.961733	DGCR14	7.89507	7.07293	11.5128	9.05983	55.5613	0.596452	0.306217	1.94781	0.0514377	0.134505
ENST00000252229	MICB	2.80739	3.34843	3.82505	4.21599	92.5629	0.409496	0.237606	1.72342	0.0848123	0.429391	MICB	12.356	12.6362	12.107	8.83117	56.7408	-0.129146	0.302215	-0.427331	0.669138	0.812584
ENST00000252268	DPF2	13.4428	15.0685	16.4646	15.184	399.438	0.174655	0.116894	1.49413	0.135141	0.544476	DPF2	48.4577	42.7767	44.9648	45.0978	242.702	0.13848	0.144997	0.955057	0.339549	0.538006
ENST00000252338	FAM155B	2.17889	1.97517	1.7533	2.04103	85.9531	-0.106643	0.245447	-0.434484	0.663937	0.946368	FAM155B	0.442332	0.297203	0.178621	0.537448	2.44187	-0.15783	1.5921	-0.0991331	0.921033	NA
ENST00000252483	NECTIN2	30.7129	31.5013	31.7777	31.971	913.502	0.059194	0.0745718	0.793785	0.42732	0.852062	PVRL2	45.9214	42.2404	15.044	18.2319	211.049	-1.26524	0.165476	-7.64608	2.07e-14	3.15e-13
ENST00000252530	FAM98C	9.70852	8.67942	9.17125	9.58378	127.272	0.0525443	0.201955	0.260179	0.794726	0.968264	FAM98C	11.9645	15.073	20.5337	13.8104	71.8037	0.454885	0.276348	1.64606	0.0997515	0.224113
ENST00000252542	SAFB2	14.9142	15.5844	11.6388	11.9366	461.152	-0.34742	0.106538	-3.26099	0.00111026	0.017195	SAFB2	10.8078	11.0399	10.7045	11.6235	137.041	0.163004	0.190448	0.855898	0.392054	0.590728
ENST00000252595	SLC27A1	1.04648	1.09295	1.1655	1.13555	42.0759	0.12911	0.343082	0.376325	0.706676	0.958299	SLC27A1	4.20147	2.82297	2.47967	1.70164	23.7457	-0.72874	0.482332	-1.51087	0.130822	0.276485
ENST00000252599	COLGALT1	38.5626	38.068	37.6349	38.7555	1504.37	0.019509	0.0580435	0.336109	0.736788	0.961608	COLGALT1	62.9922	60.3293	27.3801	29.3643	362.022	-0.981673	0.123123	-7.97309	1.55e-15	2.53e-14
ENST00000252603	PGLS	27.3206	29.1029	17.6067	18.6473	251.372	-0.614107	0.146142	-4.20212	2.64e-05	0.000663935	PGLS	82.2714	81.558	89.8642	87.8359	294.209	0.248885	0.129778	1.91778	0.0551384	0.141314
ENST00000252622	LSM7.00	48.5985	50.5935	27.8044	35.288	214.4	-0.6287	0.163255	-3.85104	0.000117619	0.00250001	LSM7	213.51	217.229	214.456	210.986	292.813	0.155271	0.129847	1.1958	0.231774	0.414948
ENST00000252655	RSPH3	2.85546	3.9073	2.46242	1.78635	64.437	-0.646505	0.298377	-2.16674	0.0302549	0.22361	RSPH3	4.84669	3.75749	2.70993	4.98291	30.7513	-0.0162635	0.414924	-0.0391962	0.968734	0.984548
ENST00000252674	MLLT1	6.34709	6.14847	5.05147	5.14384	276.979	-0.269475	0.13685	-1.96913	0.0489381	0.311305	MLLT1	17.9275	17.9428	14.0264	17.2445	124.292	-0.0464708	0.203899	-0.227911	0.819716	0.905444
ENST00000252699	ACTN4	302.179	300.872	273.207	271.907	15438.1	-0.121686	0.0174843	-6.95972	3.41e-12	2.32e-10	ACTN4	300.146	283.87	300.125	310.295	3621.08	0.201001	0.04102	4.90006	9.58e-07	7.61e-06
ENST00000252729	CACNG6	1.67583	1.19067	1.13346	1.47341	27.3303	-0.112962	0.436429	-0.258834	0.795764	0.968264	CACNG6	13.651	14.8373	3.24265	5.20359	30.7745	-1.56147	0.44027	-3.54662	0.000390212	0.00202443
ENST00000252744	ZSWIM6	5.49432	5.34599	5.25265	5.6139	322.891	0.0275273	0.126744	0.217189	0.828061	0.974172	ZSWIM6	7.73262	7.79332	6.24511	6.0548	110.179	-0.197261	0.213174	-0.925352	0.354783	0.55315
ENST00000252797	ZNF764	2.41754	2.44728	1.2657	1.53409	56.4443	-0.773014	0.305941	-2.52668	0.0115148	0.111336	ZNF764	1.53515	1.03147	1.0332	1.65801	6.97013	0.219651	0.881737	0.249112	0.803274	0.895887
ENST00000252804	PXDN	1.59434	1.54632	1.43265	1.52499	112.038	-0.0625811	0.21382	-0.292681	0.769766	0.967067	PXDN	1.31752	2.46604	2.28016	2.45843	42.212	0.389858	0.366085	1.06494	0.286904	0.482942
ENST00000252809	GDF15	15.6628	14.8449	19.6028	20.2141	227.74	0.408243	0.150647	2.70994	0.00672954	0.0731586	GDF15	58.2959	60.1199	124.274	122.445	380.227	1.22259	0.118608	10.3078	6.49e-25	1.67e-23
ENST00000252818	JUND	18.6398	20.2911	15.1888	15.0245	359.17	-0.341684	0.121702	-2.80754	0.00499212	0.0581691	JUND	51.5433	54.5757	30.8566	26.0742	182.603	-0.770823	0.169899	-4.53695	5.71e-06	4.12e-05
ENST00000252826	TRPM4	1.67143	1.73176	1.11278	0.931569	59.4671	-0.711219	0.297328	-2.39204	0.0167552	0.14547	TRPM4	3.5542	5.14205	4.44462	3.48264	64.9602	-0.0162561	0.291481	-0.0557708	0.955524	0.97879
ENST00000252840	ZNF557	3.20688	3.27769	4.21227	5.03253	244.549	0.535684	0.150061	3.56978	0.000357278	0.0066134	ZNF557	3.72245	4.24102	6.27415	4.91619	27.1729	0.61372	0.4343	1.41312	0.15762	0.316273
ENST00000252891	NUMBL	6.93037	6.76944	5.13131	5.8977	237.169	-0.288809	0.150182	-1.92307	0.0544719	0.331947	NUMBL	14.8558	14.9724	10.3829	11.5244	102.122	-0.344752	0.222769	-1.54757	0.121725	0.261226
ENST00000252934	ATXN10	31.2833	30.9843	30.8924	31.0499	1102.91	0.0164785	0.0676042	0.24375	0.807424	0.969577	ATXN10	147.245	153.569	141.462	147.933	930.582	0.0869256	0.0770439	1.12826	0.25921	0.449859
ENST00000252971	MNX1	1.86999	1.75772	1.29767	1.34565	36.8889	-0.43268	0.370137	-1.16897	0.242414	0.71036	MNX1	0.86775	1.74912	2.10247	2.10869	8.99297	0.839167	0.779508	1.07653	0.281689	0.476104
ENST00000252992	CEP85	8.43146	8.16113	8.53997	8.85968	360.648	0.0925546	0.119513	0.77443	0.438677	0.85719	CEP85	7.03242	6.90353	8.18748	7.76783	75.1757	0.348103	0.257741	1.3506	0.176825	0.343422
ENST00000252996	TAF4	2.06592	2.15412	1.76991	1.49753	93.3117	-0.345062	0.236668	-1.458	0.144842	0.565557	TAF4	5.77274	4.71909	5.7501	3.27323	72.7978	-0.212493	0.399543	-0.531841	0.594836	0.758874
ENST00000252999	LAMA5	9.32621	9.20422	5.0366	5.27524	886.265	-0.821555	0.0779942	-10.5336	6.05e-26	8.57e-24	LAMA5	18.7592	18.9444	12.0246	12.7238	754.419	-0.492254	0.0853498	-5.76749	8.05e-09	8.18e-08
ENST00000253023	UBE2M	73.1873	74.5942	80.5507	77.2841	955.1	0.118988	0.0732379	1.62467	0.104232	0.479188	UBE2M	331.995	347.25	362.574	347.937	840.788	0.226397	0.0804264	2.81496	0.00487839	0.0189166
ENST00000253024	TRIM28	166.11	167.317	150.873	153.361	5780.31	-0.108146	0.0292301	-3.69983	0.000215747	0.00427558	TRIM28	282.541	281.316	244.647	234.333	2864.07	-0.0907065	0.0443206	-2.0466	0.0406977	0.111642
ENST00000253031	YIPF2	5.32523	6.10808	5.48473	4.32714	119.445	-0.196603	0.214515	-0.916503	0.359403	0.808231	YIPF2	17.1782	19.0887	11.7392	13.3795	63.7085	-0.405993	0.287197	-1.41364	0.157468	0.316253
ENST00000253039	EIF2S3	138.641	138.587	141.589	138.786	5196.56	0.0403258	0.030846	1.30733	0.191102	0.645454	EIF2S3	128.866	121.11	135.93	135.974	816.693	0.247078	0.0826025	2.99116	0.00277916	0.0116007
ENST00000253047	TMEM160	13.8485	12.1013	6.09247	4.48891	64.2769	-1.2702	0.300372	-4.22874	2.35e-05	0.0005985	TMEM160	57.3777	59.6935	38.1184	44.9779	123.674	-0.343577	0.202951	-1.69291	0.0904732	0.208031
ENST00000253048	ZC3H4	7.99495	8.36706	6.51322	6.17094	480.485	-0.343282	0.10477	-3.27651	0.00105097	0.0164005	ZC3H4	10.0945	9.79698	5.88804	5.84057	133.67	-0.629375	0.195733	-3.21547	0.00130232	0.00594926
ENST00000253055	MAP3K10	3.33057	3.76578	2.65754	2.4336	123.162	-0.455038	0.208145	-2.18615	0.0288044	0.215291	MAP3K10	0.218848	0.36761	0.706993	1.06363	7.48956	1.74682	0.900012	1.94089	0.0522722	0.136194
ENST00000253063	SESN2	1.60511	1.98269	1.57735	1.54692	62.6032	-0.175517	0.287122	-0.611296	0.541003	0.902725	SESN2	2.1748	3.06862	2.28337	3.69943	18.4055	0.190283	0.533722	0.35652	0.721451	0.847288
ENST00000253083	HIP1R	5.98075	6.65102	4.89091	4.44813	266.716	-0.411663	0.142971	-2.87936	0.00398487	0.0485429	HIP1R	4.10524	4.46584	4.34175	3.7212	59.3509	0.0867059	0.290649	0.298318	0.76546	0.873553
ENST00000253107	PPAN	9.40724	8.4129	6.56913	7.20736	195.866	-0.347271	0.165797	-2.09455	0.0362112	0.25376	PPAN	1.32419	1.03801	1.42594	1.60893	8.83985	0.508058	0.771786	0.658288	0.510353	0.691705
ENST00000253108	EIF3G	67.0494	72.1582	57.9819	57.4072	756.412	-0.246684	0.0839009	-2.94018	0.00328022	0.0416035	EIF3G	133.315	130.636	151.229	163.039	613.982	0.388583	0.0934697	4.15731	3.22e-05	0.000203961
ENST00000253110	SHFL	3.13651	2.88207	2.28767	2.12413	54.1406	-0.424032	0.30687	-1.3818	0.167034	0.605469	C19orf66	10.5227	12.2926	7.82248	6.10215	35.0375	-0.516346	0.383971	-1.34475	0.178706	0.345611
ENST00000253115	ZNF426	2.33515	2.04748	2.39477	2.51287	177.996	0.187257	0.172205	1.08741	0.276858	0.746242	ZNF426	1.8843	2.15231	1.97837	3.05265	16.1072	0.425317	0.569966	0.746216	0.455537	0.647653
ENST00000253122	SLC6A8	1.51754	1.28882	1.36244	1.73634	62.6026	0.167035	0.288577	0.578822	0.56271	0.910378	SLC6A8	5.47981	4.52872	10.8871	10.9194	66.6904	1.3159	0.284219	4.62988	3.66e-06	2.72e-05
ENST00000253144	ZNF331	4.87849	4.78103	5.01955	5.93563	280.338	0.205637	0.139457	1.47455	0.140333	0.556054	ZNF331	7.5155	5.75662	8.19417	7.48789	45.0521	0.329218	0.337028	0.976828	0.328654	0.527528
ENST00000253193	LRP3	13.2909	13.4917	7.14246	7.4008	450.953	-0.856899	0.109659	-7.81421	5.53e-15	4.46e-13	LRP3	2.44029	2.64163	0.328476	0.549081	15.2701	-2.28742	0.684776	-3.34039	0.000836611	0.00399721
ENST00000253237	GRWD1	26.8737	26.1104	22.8404	22.4277	1418.98	-0.203035	0.0600664	-3.38017	0.000724416	0.0120358	GRWD1	64.7563	61.4904	57.0881	54.034	350.406	-0.0502783	0.12011	-0.418602	0.675507	0.81643
ENST00000253247	NOL11	52.2092	55.6548	54.4645	52.5781	1647.53	0.0130155	0.0572186	0.227469	0.820059	0.972373	NOL11	66.7866	67.0182	70.3552	65.8591	634.699	0.177102	0.0917536	1.93019	0.0535831	0.13843
ENST00000253270	SLC35D2	6.3945	6.84736	6.27631	7.44053	117.965	0.0748999	0.211096	0.354814	0.722729	0.960956	SLC35D2	11.9775	14.7772	11.508	12.7967	57.2774	0.0496946	0.300304	0.165481	0.868565	0.934247
ENST00000253329	PPIL4	10.0044	9.5747	9.16494	8.44311	247.997	-0.12905	0.145204	-0.888748	0.374139	0.820448	PPIL4	25.1782	24.0928	19.7064	21.6552	145.612	-0.0852104	0.185696	-0.45887	0.646327	0.795169
ENST00000253363	RBM39	48.7567	48.5123	47.9208	50.0762	2663.56	0.0347982	0.0440152	0.790594	0.429181	0.852653	RBM39	86.795	93.6963	94.9669	90.302	641.929	0.168624	0.0926417	1.82017	0.0687326	0.168153
ENST00000253382	ACSS2	7.37564	6.92833	7.93446	7.39547	233.729	0.123961	0.149273	0.830431	0.406295	0.842377	ACSS2	13.4509	13.7529	20.3097	17.0538	153.917	0.615609	0.182894	3.36593	0.00076285	0.00368844
ENST00000253407	C1QL1	3.3715	2.46162	2.40702	1.7192	40.9381	-0.475474	0.364118	-1.30583	0.191612	0.64604	C1QL1	11.0594	11.69	2.28745	2.94971	23.591	-1.93028	0.521729	-3.69978	0.000215791	0.00117617
ENST00000253413	ATP6V1E1	48.9822	47.6314	54.1225	56.1673	743.891	0.215038	0.0831173	2.58717	0.00967685	0.0977037	ATP6V1E1	245.733	245.49	308.511	291.09	818.759	0.428576	0.0814858	5.25952	1.44e-07	1.28e-06
ENST00000253457	EMC8	22.6535	24.1903	21.6867	22.9139	484.531	-0.0467464	0.104315	-0.448125	0.654063	0.942854	EMC8	105.053	90.8479	76.681	76.9079	243.595	-0.228465	0.145437	-1.57089	0.116208	0.252136
ENST00000253458	GSE1	7.09299	6.82711	6.11461	6.4555	527.138	-0.123136	0.0995032	-1.23751	0.2159	0.675364	GSE1	9.20671	9.74005	5.74991	5.90589	121.988	-0.545373	0.204874	-2.66199	0.00776803	0.0282389
ENST00000253462	GINS2	22.5442	20.6464	21.7782	23.0955	623.978	0.0791825	0.0931026	0.850486	0.395055	0.836641	GINS2	116.24	115.257	139.907	138.036	311.515	0.397123	0.126091	3.1495	0.00163548	0.00728847
ENST00000253496	F12	3.11082	2.35295	1.3838	1.69121	47.0553	-0.805296	0.34127	-2.3597	0.0182896	0.155392	F12	4.63957	4.67599	6.03186	4.39979	40.5186	0.194311	0.356832	0.544544	0.586067	0.754036
ENST00000253669	HAUS8	9.0605	10.512	6.79201	6.3438	123.853	-0.551272	0.208982	-2.63789	0.00834233	0.0870824	HAUS8	12.9003	13.5148	16.8618	11.5494	75.154	0.214147	0.268124	0.798685	0.424473	0.618554
ENST00000253686	MRPS25	14.5313	14.906	14.2409	13.7806	708.018	-0.0470761	0.0851851	-0.552634	0.580514	0.917863	MRPS25	101.373	88.3844	104.29	82.6033	215.515	0.125541	0.158832	0.790403	0.429293	0.622994
ENST00000253693	CAPN7	13.0434	12.667	12.2936	11.5442	580.566	-0.0850722	0.0948272	-0.897128	0.369651	0.817262	CAPN7	13.953	16.3919	11.4071	11.3369	140.64	-0.271111	0.191518	-1.41559	0.156895	0.315342
ENST00000253699	RBSN	8.06419	7.96594	8.36597	7.59495	575.887	0.0177878	0.0960537	0.185186	0.853083	0.978672	RBSN	5.76987	5.45731	4.0864	4.63777	50.2738	-0.270952	0.317299	-0.853934	0.393142	0.591527
ENST00000253778	GFPT2	16.1337	15.5404	17.0641	16.0247	529.775	0.0870674	0.0992359	0.877378	0.380281	0.824911	GFPT2	33.3682	29.0021	28.0618	26.533	261.235	-0.0699839	0.140052	-0.499698	0.617288	0.775118
ENST00000253794	VPS25	64.669	68.0459	76.2516	70.07	818.718	0.164852	0.0811757	2.03081	0.0422746	0.282014	VPS25	313.566	305.268	245.262	296.915	672.016	-0.0618673	0.139665	-0.44297	0.657788	0.803429
ENST00000253807	PCDHAC1	0.786498	0.755622	0.93144	0.9512	48.9617	0.311876	0.318511	0.97917	0.327496	0.788488	PCDHAC1	3.17977	3.78741	0.96303	1.05369	27.6879	-1.66632	0.467456	-3.56466	0.000364323	0.00190608
ENST00000253814	NDFIP1	30.7531	29.9744	29.9119	30.9384	1171.35	0.0269514	0.066091	0.407793	0.683426	0.951769	NDFIP1	257.906	245.014	160.988	174.473	612.861	-0.411641	0.0953041	-4.31923	1.57e-05	0.000105537
ENST00000253861	EXOC4	16.2382	14.9674	16.5483	15.6182	714.512	0.0677728	0.0869492	0.779453	0.435713	0.855335	EXOC4	41.5846	39.7507	25.535	25.9579	419.647	-0.507233	0.112001	-4.52881	5.93e-06	4.27e-05
ENST00000253925	PPFIA1	14.2703	12.646	12.8209	12.7399	740.261	-0.0505318	0.0871801	-0.579625	0.562167	0.910093	PPFIA1	14.2429	11.9623	10.8718	10.9743	189.389	-0.144125	0.16522	-0.872321	0.383033	0.581758
ENST00000253928	FLYWCH1	5.19158	5.72671	2.96052	3.52322	235.786	-0.727788	0.155394	-4.68349	2.82e-06	8.78e-05	FLYWCH1	4.2767	5.97561	3.88575	4.60584	43.045	-0.139858	0.352469	-0.396795	0.691518	0.828151
ENST00000254029	WDR44	8.20366	8.54096	7.45366	7.58083	352.275	-0.131377	0.121134	-1.08456	0.278116	0.747789	WDR44	7.77496	6.53	4.70948	5.92742	73.5354	-0.283565	0.267675	-1.05936	0.289434	0.486144
ENST00000254037	ZCCHC9	4.91448	5.25134	4.99311	4.81042	247.908	-0.0283096	0.144736	-0.195595	0.844927	0.976002	ZCCHC9	22.5986	22.7761	26.1327	24.6499	84.9437	0.289108	0.242886	1.1903	0.233927	0.417417
ENST00000254051	TNS4	87.7172	86.1938	87.5167	88.5905	3856.47	0.0421417	0.0359774	1.17134	0.241463	0.709411	TNS4	45.0655	47.4793	34.0773	32.8773	372.945	-0.330046	0.117921	-2.79888	0.0051281	0.0197673
ENST00000254101	PRKAB2	4.80249	4.4964	4.06852	4.44168	256.414	-0.103829	0.143353	-0.724288	0.468889	0.870289	PRKAB2	7.67576	9.28322	3.71951	5.59578	23.4785	-0.776532	0.478277	-1.6236	0.104461	0.232763
ENST00000254190	CHSY1	11.9546	11.5158	12.254	12.0505	600.492	0.074414	0.092497	0.804502	0.421107	0.849802	CHSY1	6.07425	5.5972	4.31006	3.79564	53.3455	-0.392419	0.309765	-1.26683	0.205217	0.380718
ENST00000254193	SNRPA1	32.703	30.449	26.8527	30.3447	341.158	-0.118844	0.126059	-0.942764	0.345802	0.800145	SNRPA1	168.389	179.338	197.713	190.671	626.587	0.326942	0.0923826	3.539	0.000401641	0.00207763
ENST00000254250	THAP1	7.07145	7.7896	8.45562	9.18399	189.464	0.271339	0.16653	1.62937	0.103234	0.476657	THAP1	34.3067	34.2467	28.8946	40.4928	96.5224	0.150041	0.237537	0.631653	0.527614	0.705288
ENST00000254260	RHPN2	30.9742	31.4864	35.3949	33.9231	1244.21	0.174321	0.0641281	2.71832	0.00656149	0.0716476	RHPN2	111.695	111.651	117.123	119.195	1049.25	0.212525	0.0715444	2.97053	0.00297285	0.012351
ENST00000254286	ACTR10	15.984	16.0851	15.133	15.7426	408.525	-0.0306812	0.112229	-0.273381	0.78456	0.968264	ACTR10	69.2598	73.3357	75.0087	74.014	402.72	0.189337	0.112749	1.67929	0.0930961	0.212838
ENST00000254301	LGALS3	26.7846	24.4804	25.1027	22.6897	255.74	-0.0771735	0.144474	-0.534168	0.593225	0.923742	LGALS3	200.986	190.781	247.194	250.293	736.568	0.478488	0.0853035	5.60924	2.03e-08	1.98e-07
ENST00000254322	DNAJB1	64.0774	61.6691	104.172	100.091	1998.45	0.723937	0.0515494	14.0436	8.44e-45	2.26e-42	DNAJB1	131	130.171	216.724	188.267	760.569	0.768299	0.0903098	8.50737	1.78e-17	3.22e-16
ENST00000254323	ZSWIM4	1.86452	1.18646	1.30694	1.30686	66.2185	-0.19915	0.29384	-0.677749	0.497931	0.884389	ZSWIM4	1.61845	3.12048	1.61969	2.22297	27.818	-0.192476	0.455736	-0.422341	0.672776	0.814683
ENST00000254325	RFX1	0.541678	0.74711	0.360051	0.552045	25.9191	-0.47465	0.455372	-1.04233	0.297257	0.763212	RFX1	3.90975	3.8688	2.84187	3.62763	45.2621	-0.127297	0.336921	-0.377823	0.705562	0.837281
ENST00000254337	DCAF15	5.38095	5.7753	4.84046	4.79407	127.593	-0.187521	0.201269	-0.931691	0.351496	0.804185	DCAF15	12.2949	8.18299	14.3325	16.207	101.58	0.716648	0.23455	3.05541	0.0022475	0.00961142
ENST00000254436	TRIM21	8.742	8.44601	8.57486	8.84568	180.535	0.0434221	0.168748	0.25732	0.796932	0.968264	TRIM21	15.0908	16.8336	18.8142	15.8436	102.265	0.255666	0.224061	1.14106	0.253846	0.44306
ENST00000254442	WDR7	2.33847	2.36158	2.25197	2.31894	351.917	-0.0161511	0.120797	-0.133704	0.893636	0.983379	WDR7	5.97851	6.87277	3.79107	4.08604	100.454	-0.590564	0.228463	-2.58494	0.00973947	0.0341336
ENST00000254480	SMARCC1	25.8763	25.2322	24.9894	26.7231	1761.26	0.0409904	0.055174	0.74293	0.457524	0.867081	SMARCC1	27.4595	27.4212	28.0012	28.0076	402.967	0.166619	0.111784	1.49054	0.136082	0.284104
ENST00000254508	NUP210	31.152	31.1053	28.1555	27.979	2298.79	-0.125318	0.0466119	-2.68854	0.00717661	0.0772017	NUP210	22.239	21.7073	4.78063	5.37732	326.141	-1.9776	0.141606	-13.9655	2.53e-44	1.19e-42
ENST00000254521	HSD17B7	8.51523	8.51486	10.1485	8.20655	113.546	0.132115	0.215928	0.611846	0.54064	0.902581	HSD17B7	24.4904	28.5907	28.4326	27.2769	123.397	0.20329	0.203472	0.999105	0.317744	0.517692
ENST00000254528	EMILIN2	0.522428	0.71487	0.40635	0.741985	38.2135	-0.0835301	0.38513	-0.216888	0.828296	0.974172	EMILIN2	0.396544	0.199829	0	0.32121	3.08663	-0.741892	1.4953	-0.496149	0.619789	0.776733
ENST00000254579	DNHD1	0.873439	0.966783	1.06596	1.07296	159.667	0.241052	0.180282	1.33708	0.181196	0.630479	DNHD1	0.117136	0.118056	0.390237	0.409182	16.414	1.91697	0.598128	3.20495	0.00135085	0.00614152
ENST00000254605	RRP8	6.36656	6.45349	6.75656	6.62807	463.409	0.086214	0.105068	0.820552	0.411901	0.845804	RRP8	17.0932	17.0735	12.9422	19.4707	98.9528	0.0418927	0.241359	0.17357	0.862203	0.930381
ENST00000254616	TIMM10B	13.5416	12.7497	12.4677	12.0903	382.056	-0.074365	0.116781	-0.636791	0.524261	0.897431	TIMM10B	99.9985	105.55	55.6603	80.4536	115.77	-0.45923	0.220316	-2.08441	0.0371227	0.103351
ENST00000254630	PTCD3	21.0871	21.6611	21.5028	20.9671	1534.73	0.014619	0.05759	0.253846	0.799615	0.968264	PTCD3	51.6144	42.3486	45.6418	44.0587	413.711	0.0669481	0.117265	0.570914	0.568058	0.738746
ENST00000254654	ILKAP	10.8958	10.2776	9.96018	10.8978	164.848	0.00238172	0.177692	0.0134037	0.989306	0.998282	ILKAP	24.6773	25.05	31.1857	25.8852	139.926	0.362846	0.191279	1.89694	0.0578353	0.146708
ENST00000254657	PER2	6.02003	5.54587	4.87217	5.54669	377.946	-0.126646	0.120771	-1.04865	0.294341	0.761175	PER2	5.26804	6.20361	3.82917	4.04263	79.1473	-0.406788	0.256685	-1.58477	0.113018	0.246902
ENST00000254667	PTPRE	2.55994	2.68245	3.19122	2.77738	161.196	0.211203	0.18064	1.16919	0.242327	0.710274	PTPRE	0.695935	1.3026	1.08397	1.08718	9.49088	0.272138	0.750255	0.362728	0.716808	0.84457
ENST00000254691	CARD6	3.50108	3.33903	3.01677	2.75654	137.203	-0.220593	0.194795	-1.13244	0.25745	0.726279	CARD6	3.35552	3.58478	3.49593	3.18011	46.2016	0.0681942	0.328689	0.207474	0.83564	0.9152
ENST00000254719	RPA1	18.3939	18.7471	15.5778	15.7719	894.271	-0.22052	0.0756252	-2.91596	0.00354593	0.0442005	RPA1	123.257	127.072	131.664	146.742	1078.11	0.283262	0.0749351	3.7801	0.000156764	0.000876229
ENST00000254730	EEFSEC	5.18849	4.41002	3.76244	4.71467	107.388	-0.155208	0.225484	-0.688331	0.491244	0.882928	EEFSEC	11.3265	10.7093	16.4091	14.0458	104.443	0.579275	0.222359	2.60513	0.00918393	0.0325085
ENST00000254759	COQ3	10.3613	9.25077	9.03525	8.63844	133.121	-0.12612	0.198126	-0.636566	0.524407	0.897431	COQ3	20.5574	15.7767	20.5632	27.2695	101.863	0.51866	0.229195	2.26296	0.0236381	0.0714275
ENST00000254765	POPDC3	2.7399	1.9135	2.57088	2.06776	47.0664	0.0193921	0.336685	0.0575971	0.95407	0.993183	POPDC3	3.34814	3.61546	2.31777	2.03405	11.0578	-0.482226	0.690964	-0.697904	0.485237	0.67372
ENST00000254770	LANCL2	5.40662	5.68796	4.89732	4.7764	243.563	-0.173669	0.14593	-1.19008	0.234015	0.701078	LANCL2	16.5478	20.2626	21.5456	18.6029	113.912	0.241352	0.213509	1.13041	0.258305	0.448764
ENST00000254799	GRSF1	21.7587	20.571	21.8927	21.1288	1520.94	0.0474165	0.0590682	0.802741	0.422125	0.849802	GRSF1	71.4784	75.6926	73.5947	80.3305	479.498	0.217966	0.104719	2.08144	0.0373939	0.103966
ENST00000254803	UTP3	17.0719	17.8802	16.844	17.0509	374.844	-0.0202712	0.117342	-0.172753	0.862845	0.979578	UTP3	21.6481	20.3537	24.6414	27.7154	150.659	0.420456	0.182737	2.30088	0.0213982	0.065881
ENST00000254810	H3-3B	214.342	217.686	235.73	237.463	6603.24	0.155347	0.0272544	5.6999	1.2e-08	5.68e-07	H3F3B	763.482	826.207	771.799	849.315	1428.49	0.182515	0.0668623	2.72972	0.00633883	0.0237759
ENST00000254816	TRIM47	19.3402	19.1953	16.8931	15.9202	436.116	-0.207876	0.109226	-1.90318	0.0570177	0.34092	TRIM47	37.9601	38.478	32.2435	29.9533	288.535	-0.151832	0.131788	-1.1521	0.249281	0.437752
ENST00000254846	KDM6B	0.353023	0.36518	0.453662	0.469277	29.7293	0.385887	0.408607	0.944395	0.344968	0.800145	KDM6B	1.11714	1.04251	1.8546	1.86008	33.2993	0.94513	0.391237	2.41575	0.0157029	0.0508078
ENST00000254878	RIDA	25.5837	27.8179	29.2595	30.428	301.029	0.184596	0.13178	1.40079	0.161276	0.595629	HRSP12	108.708	111.609	115.694	125.912	208.872	0.311034	0.15509	2.0055	0.0449097	0.120792
ENST00000254898	MATN2	1.52246	1.6608	1.29585	1.67688	68.5665	-0.0746474	0.275812	-0.270646	0.786663	0.968264	MATN2	8.15322	7.85039	7.67247	5.74926	92.4961	-0.169544	0.240166	-0.705945	0.480222	0.66872
ENST00000254900	BRD8	12.3472	13.6502	12.6123	13.3773	614.937	0.0236237	0.0943792	0.250306	0.802351	0.968509	BRD8	10.8758	11.1883	7.44103	8.55854	154.125	-0.349404	0.182235	-1.91733	0.0551965	0.141388
ENST00000254928	ERAL1	32.6254	31.825	35.024	32.2269	653.719	0.085396	0.0898997	0.949903	0.342162	0.799501	ERAL1	84.8818	90.3633	82.9584	81.8495	490.233	0.0713096	0.102448	0.696055	0.486394	0.67457
ENST00000254940	NIP7	29.7448	30.7774	30.6102	30.8638	675.86	0.0465545	0.0870445	0.534836	0.592763	0.923742	NIP7	150.013	154.308	156.44	167.708	373.124	0.20156	0.117775	1.7114	0.0870076	0.201732
ENST00000254942	TERF2	5.15515	4.8549	5.67838	4.97704	166.944	0.114158	0.177566	0.642902	0.520288	0.89564	TERF2	31.2015	27.0466	30.7992	29.6422	211.822	0.21803	0.154248	1.4135	0.157508	0.316253
ENST00000254950	VPS4A	19.1659	17.2744	20.2817	20.4084	854.119	0.183169	0.0801631	2.28495	0.0223158	0.180874	VPS4A	67.8418	63.7198	64.8233	59.2102	369.479	0.0510201	0.117799	0.433111	0.664934	0.80946
ENST00000254958	JAG1	19.2878	20.0849	20.614	22.9109	1327.95	0.168699	0.065721	2.5669	0.0102611	0.102016	JAG1	15.8271	16.2393	7.19879	7.28952	183.347	-0.999288	0.169991	-5.87847	4.14e-09	4.3e-08
ENST00000254963	HSPA12B	0.704247	0.599888	0.33519	0.134068	14.9187	-1.45068	0.640363	-2.2654	0.0234883	0.188273	HSPA12B	0.304345	0.715713	0.368698	0.616315	4.45896	0.102261	1.13639	0.089987	0.928298	0.96578
ENST00000254976	SNAP25	12.7375	12.2991	12.8903	12.5315	279.268	0.0460607	0.135725	0.339369	0.734332	0.961608	SNAP25	22.9726	25.5364	20.0541	15.1877	55.5088	-0.30894	0.309511	-0.998157	0.318203	0.518236
ENST00000254998	NXT1	33.0876	33.317	32.6318	34.6073	382.62	0.0420589	0.11622	0.36189	0.717434	0.960728	NXT1	129.742	109.719	90.9332	106.906	200.249	-0.134549	0.164608	-0.817386	0.413708	0.609611
ENST00000255006	RIN2	19.2375	19.6356	18.8733	18.1499	921.913	-0.0463035	0.0746032	-0.620664	0.534821	0.89973	RIN2	33.8384	33.2124	30.0976	31.0824	399.096	0.0127028	0.112726	0.112687	0.910279	0.955972
ENST00000255078	IGHMBP2	4.22932	3.67213	3.261	3.20778	153.315	-0.264604	0.186414	-1.41945	0.155769	0.585212	IGHMBP2	4.62555	5.01504	5.51871	4.51319	65.1069	0.258827	0.279047	0.92754	0.353646	0.552082
ENST00000255087	TESMIN	0.644724	0.902574	0.662816	0.372811	17.6207	-0.555198	0.557216	-0.996377	0.319067	0.781674	MTL5	3.56187	3.45177	4.31502	3.16262	24.4291	0.248096	0.454012	0.546452	0.584756	0.752523
ENST00000255108	DPH2	17.0662	16.6346	18.1838	17.8847	463.929	0.121991	0.10509	1.16082	0.245714	0.713398	DPH2	13.2356	11.6183	18.448	18.8484	100.008	0.705971	0.227499	3.10318	0.00191455	0.00836661
ENST00000255136	PABPC1L	1.6505	1.72719	2.02236	1.52901	39.7746	0.096368	0.357008	0.269932	0.787213	0.968264	PABPC1L	0.113345	0.571172	2.60891	1.10174	9.07148	2.59287	0.922163	2.81173	0.00492758	0.0190894
ENST00000255152	ZSWIM3	0.942003	1.35407	1.28621	0.983509	34.1641	0.00740837	0.392227	0.018888	0.98493	0.997979	ZSWIM3	2.1998	1.31008	1.93814	0.971936	14.4271	-0.118949	0.619077	-0.192139	0.847634	0.922404
ENST00000255194	AP3B1	18.743	18.2242	18.204	18.4008	1157.79	0.00982216	0.0662363	0.14829	0.882114	0.981632	AP3B1	28.0537	27.9534	31.2113	33.8543	438.246	0.378902	0.109528	3.45942	0.000541345	0.00270519
ENST00000255304	USPL1	5.62714	5.67698	5.25718	5.96493	297.175	0.0135432	0.133669	0.101319	0.919297	0.986063	USPL1	3.88755	5.13845	3.78309	3.32968	56.7522	-0.217464	0.30573	-0.711294	0.476902	0.666329
ENST00000255305	XPO4	9.85962	9.52149	10.2781	9.75888	1054.35	0.0720469	0.0702737	1.02523	0.305253	0.769734	XPO4	9.67417	12.6752	8.49682	9.6974	152.964	-0.187096	0.19065	-0.981355	0.326418	0.525534
ENST00000255389	PEMT	24.0914	22.1695	15.9425	16.7643	217.035	-0.476172	0.156792	-3.03697	0.00238972	0.0325696	PEMT	83.7482	81.7308	51.0855	55.8945	212.117	-0.448863	0.154951	-2.8968	0.00376991	0.0151641
ENST00000255390	SCO1	15.1628	15.3157	14.6277	15.7233	1570.39	0.0179977	0.0582578	0.308933	0.757373	0.965726	SCO1	115.604	116.045	100.274	98.8856	422.672	-0.105805	0.109762	-0.963947	0.335073	0.533922
ENST00000255608	BTBD2	19.8624	19.1466	12.7823	13.3008	460.547	-0.556655	0.10737	-5.18445	2.17e-07	8.28e-06	BTBD2	30.6212	33.6672	27.7818	27.864	207.554	-0.0710133	0.155156	-0.457689	0.647176	0.795581
ENST00000255613	KMT5C	2.93129	3.07415	2.29691	1.46994	60.1045	-0.648895	0.303695	-2.13667	0.0326249	0.237414	SUV420H2	3.31398	1.21454	1.64238	3.11146	13.9355	0.22073	0.652219	0.33843	0.73504	0.855395
ENST00000255631	HSPBP1	40.7669	38.2693	27.8575	30.6473	654.709	-0.409925	0.0918714	-4.46195	8.12e-06	0.000228078	HSPBP1	110.497	99.837	93.7027	100.34	477.099	0.0307024	0.107297	0.286144	0.774768	0.879798
ENST00000255641	CSNK1G2	12.8435	12.6172	9.03237	8.63282	336.05	-0.503329	0.12519	-4.02053	5.81e-05	0.00133332	CSNK1G2	7.88168	10.3097	7.92301	8.76147	47.3594	0.0315539	0.330084	0.0955937	0.923843	0.963507
ENST00000255681	MACROD1	3.25055	3.51044	2.25569	2.42263	38.703	-0.50719	0.362647	-1.39858	0.16194	0.596351	MACROD1	6.42402	6.69027	13.4894	12.2284	42.3677	1.09142	0.350613	3.11289	0.00185262	0.00813329
ENST00000255688	PLAAT4	3.98891	4.31214	5.68023	4.29454	37.3716	0.289017	0.368458	0.784395	0.432808	0.854526	RARRES3	5.51656	7.2706	18.5068	13.4056	24.0322	1.44833	0.480445	3.01456	0.00257356	0.0108412
ENST00000255764	MED10	12.6178	12.9141	12.5903	10.6821	144.792	-0.10965	0.191041	-0.573963	0.565993	0.912455	MED10	173.211	169.375	186.104	165.985	311.259	0.161984	0.12808	1.26471	0.205975	0.381609
ENST00000255784	CCDC134	3.34596	3.60319	2.06722	3.14199	41.5752	-0.391698	0.356595	-1.09844	0.272012	0.740747	CCDC134	8.81316	9.49492	4.04977	4.43101	19.9498	-1.00551	0.520152	-1.9331	0.0532236	0.137792
ENST00000255858	SEC14L4	1.26973	1.04179	0.920449	1.38059	31.2098	0.0174833	0.40846	0.042803	0.965859	0.994818	SEC14L4	11.9989	13.3024	8.51396	5.83161	51.0335	-0.750029	0.32403	-2.31469	0.0206298	0.0639116
ENST00000255882	PI4KA	9.95005	10.7727	9.84661	10.1415	740.769	-0.0280204	0.084835	-0.330293	0.741179	0.961733	PI4KA	10.0649	9.04277	9.4657	9.6144	268.424	0.133835	0.13691	0.977538	0.328303	0.527199
ENST00000255977	MKRN1	31.3775	33.3305	33.4323	31.7673	1083.52	0.0349632	0.0701265	0.498573	0.61808	0.931736	MKRN1	52.8449	55.5881	42.8541	44.7353	308.655	-0.195164	0.127634	-1.52909	0.126243	0.268917
ENST00000256001	ACTR3B	3.28647	3.17555	3.41666	3.70116	81.0447	0.163487	0.249772	0.654547	0.51276	0.892487	ACTR3B	3.49633	4.86617	4.23562	2.22522	20.6833	-0.231893	0.512743	-0.45226	0.651081	0.79843
ENST00000256010	NTS	30.6033	27.3043	31.7842	29.4092	397.887	0.103639	0.117111	0.884965	0.376175	0.822396	NTS	20.0593	13.2028	2.97561	4.97402	22.7908	-1.76163	0.531363	-3.3153	0.000915441	0.00432053
ENST00000256015	BTG1	19.0659	18.3413	17.5592	18.9646	922.453	-0.0104439	0.0760882	-0.13726	0.890825	0.983379	BTG1	275.932	267.024	157.278	186.424	493.203	-0.515131	0.107408	-4.79601	1.62e-06	1.25e-05
ENST00000256078	KRAS	13.394	13.1075	12.3001	12.454	750.051	-0.0743725	0.0825313	-0.901143	0.367512	0.815425	KRAS	68.8571	75.3354	53.9756	53.6879	159.373	-0.296818	0.177659	-1.67072	0.094777	0.215804
ENST00000256079	IPO8	13.1648	13.3838	13.1067	13.5293	746.679	0.0287857	0.0827585	0.347828	0.727969	0.961425	IPO8	23.8913	25.1611	19.6748	23.2393	312.601	-0.0688273	0.130787	-0.526256	0.59871	0.761855
ENST00000256151	CCDC59	19.231	19.8488	19.2141	18.6167	328.568	-0.022823	0.125206	-0.182283	0.855361	0.978878	CCDC59	56.3101	54.1329	67.8669	76.1377	204.372	0.507381	0.158317	3.20484	0.00135136	0.0061416
ENST00000256190	SBF2	10.5677	10.9408	12.451	11.4198	910.394	0.174378	0.076836	2.26948	0.0232391	0.186883	SBF2	6.81256	6.90398	4.83329	5.4421	144.498	-0.30657	0.187524	-1.63483	0.102084	0.228372
ENST00000256196	RRAS2	14.5092	13.8459	14.9253	14.8796	367.417	0.0959734	0.118407	0.810538	0.417631	0.847778	RRAS2	45.0311	52.9487	35.1287	43.1082	117.602	-0.224937	0.213204	-1.05503	0.291412	0.488625
ENST00000256255	SARAF	94.0575	93.0015	95.8131	92.5322	2044.25	0.0339214	0.0498837	0.68001	0.496498	0.883813	SARAF	224.793	222.42	70.8792	69.5923	645.607	-1.56338	0.0977251	-15.9977	1.33e-57	8.83e-56
ENST00000256257	RNF122	1.3969	1.6151	1.29025	2.01939	31.9139	0.16004	0.404777	0.395378	0.692564	0.955667	RNF122	14.3677	14.028	7.07107	3.27323	20.0881	-1.11573	0.525034	-2.12506	0.0335818	0.0951395
ENST00000256319	ERG28	9.89783	9.79173	9.36987	9.55034	241.426	-0.033465	0.145829	-0.22948	0.818496	0.972051	C14orf1	119.303	137.274	86.7178	96.0342	201.1	-0.371554	0.160362	-2.31697	0.0205052	0.0635867
ENST00000256366	SYNJ2BP	9.7502	9.5645	10.1488	10.297	756.566	0.106142	0.0820203	1.29409	0.195633	0.650082	SYNJ2BP	36.4766	31.9257	24.4205	20.4107	53.8396	-0.479276	0.311089	-1.54064	0.123405	0.264143
ENST00000256367	TTC9	0.786066	0.99457	0.927694	1.13378	52.7911	0.235363	0.313306	0.751222	0.452519	0.864774	TTC9	1.88091	3.4754	2.65839	3.04715	7.90781	0.0614275	0.829172	0.0740829	0.940944	0.972014
ENST00000256383	EIF2S1	44.6802	45.8292	48.2036	47.3278	2172.52	0.101947	0.0482599	2.11246	0.0346472	0.247182	EIF2S1	184.036	170.34	206.089	213.946	805.258	0.369492	0.083279	4.43679	9.13e-06	6.36e-05
ENST00000256398	ELP3	24.5572	23.4139	22.9512	22.2493	790.465	-0.061799	0.0810861	-0.76214	0.445976	0.860352	ELP3	40.5856	43.8535	38.2242	38.9556	291.705	-0.00431374	0.131681	-0.0327589	0.973867	0.988063
ENST00000256429	MBD2	10.3439	10.8276	11.8826	10.6792	597.158	0.115793	0.0952971	1.21508	0.224336	0.685746	MBD2	21.8432	19.7962	30.1543	28.1861	136.157	0.619281	0.192434	3.21815	0.0012902	0.00590042
ENST00000256433	IER3IP1	14.6601	14.5706	14.1295	13.2153	560.928	-0.0721847	0.0963308	-0.749342	0.453651	0.865472	IER3IP1	358.152	366.951	252.927	280.486	337.99	-0.321252	0.123947	-2.59186	0.00954594	0.0335884
ENST00000256441	MRPS36	24.1738	26.907	24.7564	29.1468	372.234	0.101654	0.124137	0.818886	0.412852	0.846405	MRPS36	324.319	275.112	309.406	299.649	411.239	0.149504	0.116334	1.28513	0.198748	0.371443
ENST00000256442	CCNB1	148.455	151.872	163.759	166.699	3451.49	0.161976	0.0382127	4.2388	2.25e-05	0.000574743	CCNB1	317.912	313.605	348.139	350.732	1905.5	0.296337	0.0532239	5.56774	2.58e-08	2.47e-07
ENST00000256443	CDK7	25.9024	27.5058	28.1316	31.8855	436.226	0.192366	0.111946	1.71837	0.0857284	0.4319	CDK7	65.1685	61.8285	81.8723	81.6258	332.104	0.501948	0.122667	4.09198	4.28e-05	0.000264948
ENST00000256458	IRAK2	5.52572	5.43021	5.32573	5.17238	198.392	-0.037548	0.16098	-0.233247	0.81557	0.970965	IRAK2	29.3963	32.6571	21.8529	22.4587	218.186	-0.377998	0.153076	-2.46935	0.0135358	0.0449104
ENST00000256460	CAMK1	2.19341	2.92442	2.52961	2.96308	41.5714	0.126061	0.35173	0.358401	0.720043	0.960728	CAMK1	14.2949	13.8384	11.621	10.0556	59.8951	-0.218795	0.29058	-0.752961	0.451473	0.644356
ENST00000256474	VHL	16.7723	17.0996	14.0788	13.9374	622.958	-0.249788	0.0909059	-2.74777	0.00600028	0.0670031	VHL	43.4551	46.4306	22.9574	28.9801	98.3536	-0.680918	0.2321	-2.93372	0.00334927	0.0136764
ENST00000256495	BHLHE40	31.6556	33.4431	38.7809	38.3787	1209.59	0.269261	0.0654466	4.11421	3.89e-05	0.000939105	BHLHE40	97.9715	94.9953	123.599	125.811	607.075	0.508006	0.0930941	5.45691	4.84e-08	4.52e-07
ENST00000256497	EDEM1	12.0446	11.4693	10.5479	11.0282	742.766	-0.100043	0.0839652	-1.19148	0.233464	0.70045	EDEM1	19.4904	21.0313	5.51794	6.30649	111.244	-1.65421	0.233696	-7.07848	1.46e-12	1.97e-11
ENST00000256538	DPH6	5.88157	4.94653	4.05444	4.80497	111.253	-0.265473	0.220875	-1.20192	0.229396	0.69426	DPH6	32.3206	28.1085	35.0498	33.2533	112.752	0.348317	0.212434	1.63964	0.101079	0.226421
ENST00000256544	KATNBL1	19.2964	17.5061	18.0518	17.7058	535.884	-0.0175273	0.100053	-0.17518	0.860938	0.979578	KATNBL1	31.5918	32.0705	24.4052	19.1925	106.199	-0.349063	0.224536	-1.5546	0.120042	0.258508
ENST00000256545	EMC7	53.9695	59.7767	57.0755	60.903	667.859	0.0767607	0.0909829	0.843683	0.398847	0.838589	EMC7	236.388	235.925	93.0185	86.6549	511.336	-1.27303	0.106769	-11.9232	8.96e-33	3.02e-31
ENST00000256637	SORT1	5.78695	5.82177	5.33338	5.46825	422.15	-0.0799189	0.110302	-0.724549	0.468729	0.870289	SORT1	21.7742	22.7891	3.04364	3.05265	134.729	-2.70827	0.243186	-11.1366	8.32e-29	2.44e-27
ENST00000256644	LAMTOR5	41.5184	41.0459	42.3447	38.1079	381.395	-0.0133479	0.117743	-0.113364	0.909742	0.985435	LAMTOR5	374.518	393.27	351.368	319.171	816.998	-0.0624287	0.0836284	-0.7465	0.455365	0.647561
ENST00000256646	NOTCH2	10.9864	10.9001	11.9768	12.3069	1422.58	0.17398	0.0595799	2.92011	0.00349904	0.043793	NOTCH2	7.94228	7.20985	4.50376	4.61974	194.603	-0.593371	0.163762	-3.62337	0.000290788	0.00155016
ENST00000256649	TRIM45	1.40974	1.54834	1.36614	1.36606	54.2214	-0.090544	0.304047	-0.297796	0.765859	0.96685	TRIM45	1.79983	1.08838	1.30824	1.4579	10.9179	0.162819	0.693713	0.234706	0.814437	0.901945
ENST00000256682	ARF3	52.1536	50.3314	54.1577	53.1149	2285.39	0.0899017	0.0474115	1.8962	0.0579334	0.344429	ARF3	143.801	160.818	106.667	121.932	317.274	-0.284379	0.130529	-2.17867	0.029356	0.0854939
ENST00000256689	SLC38A2	102.016	100.887	125.251	123.776	5846.57	0.319549	0.0289943	11.0211	3.02e-28	4.78e-26	SLC38A2	250.729	265.035	124.964	120.487	1247.05	-0.930696	0.0692765	-13.4345	3.8e-41	1.59e-39
ENST00000256707	KIDINS220	13.9103	13.6876	12.4118	13.3953	1059.43	-0.0727517	0.0707169	-1.02877	0.303586	0.767536	KIDINS220	6.05161	7.44568	3.85603	4.10617	123.65	-0.634139	0.20992	-3.02086	0.0025206	0.0106398
ENST00000256759	FST	1.20854	1.1374	1.18764	1.41595	30.6879	0.174376	0.403274	0.432401	0.66545	0.946368	FST	14.5661	13.4571	27.6945	27.7765	95.0963	1.1432	0.234456	4.87596	1.08e-06	8.56e-06
ENST00000256854	NARS1	96.7192	95.9754	104.939	102.955	2983.53	0.13357	0.0408954	3.26614	0.00109022	0.016906	NARS	145.537	146.167	158.002	155.384	1092.21	0.220182	0.0702138	3.13589	0.00171335	0.00757826
ENST00000256858	RELCH	8.02686	7.86539	6.77637	7.43473	452.525	-0.137264	0.108102	-1.26977	0.204167	0.659179	KIAA1468	8.01718	7.40677	7.08195	9.47054	132.459	0.256787	0.201571	1.27393	0.20269	0.376989
ENST00000256925	CABLES1	3.90459	3.77373	4.15693	3.56886	207.712	0.0329141	0.160166	0.205501	0.837181	0.97552	CABLES1	4.61758	3.10255	3.06336	3.20601	29.2252	-0.209648	0.418897	-0.500477	0.61674	0.77511
ENST00000256951	EMP1	4.42246	4.35317	5.64768	5.22112	313.403	0.33265	0.12885	2.58169	0.0098317	0.0986209	EMP1	109.931	104.986	221.781	224.591	344.08	1.18672	0.123897	9.57828	9.87e-22	2.22e-20
ENST00000256953	RERG	0.649707	0.613585	0.603001	0.834873	16.4945	0.210801	0.557046	0.378426	0.705114	0.958262	RERG	1.74858	2.11477	0.423663	0.849833	3.4431	-1.57451	1.39225	-1.13091	0.258094	0.448461
ENST00000256969	SPX	1.86376	1.46944	1.28966	1.42775	37.1574	-0.270665	0.371074	-0.72941	0.465751	0.870169	SPX	13.7987	19.3489	10.902	14.579	22.4176	-0.212645	0.479719	-0.443271	0.65757	0.803416
ENST00000256996	DDB2	40.5972	37.8861	41.2198	39.4203	802.227	0.0631376	0.0813846	0.775792	0.437872	0.856973	DDB2	53.1323	57.8202	59.8258	57.0324	321.098	0.229855	0.126017	1.82399	0.0681528	0.167098
ENST00000257013	RTL8C	34.9636	33.7281	29.8658	29.864	412.414	-0.177649	0.111964	-1.58666	0.11259	0.499108	FAM127A	220.482	256.352	276.056	261.907	380.66	0.346946	0.118039	2.93924	0.00329016	0.0134705
ENST00000257118	PHC2	12.0361	13.2602	15.0331	15.0594	578.249	0.274526	0.0960382	2.85851	0.00425635	0.0512424	PHC2	15.33	14.8782	12.4793	12.7133	156.363	-0.150388	0.178563	-0.842212	0.39967	0.597215
ENST00000257177	TUT4	10.262	9.96833	9.74254	9.92136	629.374	-0.016932	0.0902765	-0.187557	0.851224	0.977985	ZCCHC11	5.79594	4.64757	3.38261	4.11226	96.4376	-0.315242	0.236782	-1.33136	0.18307	0.351452
ENST00000257181	PRPF38A	5.59054	5.57468	5.1775	5.65878	310.328	-0.0190992	0.129684	-0.147275	0.882915	0.981632	PRPF38A	28.3281	27.6513	28.3732	29.5412	116.414	0.202757	0.206454	0.982095	0.326053	0.52529
ENST00000257215	DAGLA	1.55011	1.64868	1.30386	1.14081	88.1213	-0.363848	0.242806	-1.49851	0.134	0.542334	DAGLA	0.935038	0.875066	0.404553	0.405751	8.68216	-1.00776	0.803867	-1.25364	0.209974	0.387338
ENST00000257245	TIMM10	75.1127	74.0085	63.6692	61.779	494.069	-0.22536	0.102256	-2.20387	0.0275336	0.209657	TIMM10	439.986	506.566	450.584	466.011	554.117	0.100059	0.101346	0.987298	0.323497	0.523007
ENST00000257264	TCN1	0.879879	0.71487	1.27205	1.13064	16.0401	0.61533	0.56589	1.08737	0.276875	0.746242	TCN1	2.08941	2.59177	0.584127	1.17171	9.54805	-1.20725	0.790354	-1.52748	0.126641	0.269441
ENST00000257287	CEP135	3.7968	3.54839	3.50925	4.05322	224.913	0.0660994	0.154388	0.428137	0.668551	0.947526	CEP135	3.17444	3.32242	2.95821	1.55766	40.6416	-0.349248	0.365913	-0.954458	0.339852	0.538136
ENST00000257347	CARS2	24.5868	23.3408	25.1396	23.4241	478.111	0.043048	0.104927	0.410267	0.68161	0.950744	CARS2	22.4575	22.012	24.5154	28.6359	181.289	0.413207	0.166777	2.47759	0.0132271	0.0441344
ENST00000257430	APC	7.97796	7.93944	8.22146	8.30925	936.43	0.0785821	0.0734654	1.06965	0.284778	0.752936	APC	2.39893	2.59046	2.25377	2.49838	90.6835	0.0694884	0.235853	0.294626	0.76828	0.875327
ENST00000257548	USP30	2.46311	3.50924	2.66109	2.71694	114.656	-0.127134	0.225728	-0.563217	0.573287	0.915537	USP30	9.28811	8.27569	4.23991	5.39735	45.5788	-0.747125	0.343314	-2.17622	0.0295391	0.085906
ENST00000257566	TBX3	11.0887	10.9912	8.51	7.66103	433.34	-0.425291	0.111312	-3.82071	0.00013307	0.00278994	TBX3	9.17923	12.9329	5.78702	4.09704	77.0897	-0.978702	0.280674	-3.48698	0.000488515	0.00247332
ENST00000257570	OASL	0.825695	0.675539	0.48231	0.739497	23.9542	-0.273094	0.467289	-0.584422	0.558937	0.908236	OASL	5.55124	6.14065	15.5824	17.2736	76.4453	1.64988	0.271981	6.06616	1.31e-09	1.42e-08
ENST00000257575	RNFT2	4.16803	5.03089	5.35625	5.41002	209.064	0.251043	0.161575	1.55372	0.12025	0.516807	RNFT2	17.7119	16.4292	5.12689	8.18922	68.6619	-1.2054	0.295638	-4.07727	4.56e-05	0.000280173
ENST00000257604	TRAFD1	9.87413	8.92233	9.97939	11.3996	344.369	0.209767	0.126839	1.65381	0.0981663	0.463592	TRAFD1	23.7957	25.3082	30.8553	29.2032	210.833	0.449097	0.15321	2.93124	0.0033761	0.0137632
ENST00000257626	GSAP	2.91123	2.32377	2.42847	2.42832	87.0284	-0.0841783	0.246289	-0.341787	0.732511	0.961608	GSAP	2.93369	2.29967	2.17189	2.87142	28.7392	0.126085	0.421096	0.299421	0.764619	0.872914
ENST00000257632	UPK3B	10.9084	10.2774	6.80652	6.64406	120.782	-0.631407	0.209476	-3.01422	0.00257637	0.0344485	UPK3B	9.78659	6.13724	5.26931	4.75641	26.8377	-0.535707	0.450793	-1.18837	0.234689	0.418655
ENST00000257663	TMEM60	17.4246	17.4239	15.6864	16.8828	159.339	-0.0735474	0.18005	-0.408483	0.682919	0.951296	TMEM60	72.2098	73.3041	59.5868	55.9484	113.547	-0.203867	0.210447	-0.968734	0.332678	0.531127
ENST00000257696	HILPDA	15.9364	15.696	13.7043	15.7821	224.665	-0.0773084	0.153758	-0.502792	0.615111	0.929143	HILPDA	205.467	195.946	113.75	135.562	132.252	-0.551308	0.198052	-2.78365	0.00537508	0.0206103
ENST00000257700	RINT1	14.4294	14.1716	12.6679	13.1811	419.617	-0.121914	0.110935	-1.09897	0.271781	0.740518	RINT1	15.8167	16.118	16.1805	15.1607	161.883	0.106042	0.174566	0.607462	0.543544	0.718904
ENST00000257770	NT5E	18.8352	20.6008	18.898	19.398	746.293	-0.0182728	0.0849707	-0.215048	0.82973	0.974646	NT5E	30.1895	33.6036	13.8067	12.0798	164.389	-1.1629	0.18504	-6.28458	3.29e-10	3.72e-09
ENST00000257776	MRAP2	1.03248	1.10891	1.76909	2.21122	35.3538	0.918395	0.38255	2.40072	0.0163628	0.143401	MRAP2	5.77117	4.10575	0.822526	3.71232	9.40116	-0.971917	0.807864	-1.20307	0.228949	0.412334
ENST00000257787	AKIRIN2	6.32911	6.88853	3.92838	5.69856	116.73	-0.433241	0.223042	-1.94242	0.0520866	0.323884	AKIRIN2	52.1095	48.3723	41.9468	43.7371	124.621	-0.147999	0.200232	-0.739136	0.459824	0.651207
ENST00000257789	ORC3	14.8995	15.7811	16.2498	15.535	421.198	0.0750553	0.111196	0.674982	0.499687	0.88546	ORC3	28.9321	25.8099	30.6686	31.8282	275.532	0.323057	0.136413	2.36822	0.0178739	0.0566776
ENST00000257829	NAT10	27.7264	27.0258	27.648	27.5935	1178.08	0.0368698	0.0655582	0.562399	0.573844	0.915537	NAT10	31.5717	29.1508	38.4942	34.6483	453.29	0.413916	0.108571	3.81241	0.000137618	0.000779226
ENST00000257836	PRRG4	0.633936	0.57494	0.492583	0.416776	31.614	-0.38673	0.40078	-0.964944	0.334573	0.793748	PRRG4	2.15555	3.72424	5.59573	6.36059	13.6016	1.22093	0.634329	1.92475	0.0542606	0.139605
ENST00000257868	GDF11	1.5042	1.46699	1.58698	1.46757	142.976	0.0639459	0.189825	0.336868	0.736216	0.961608	GDF11	2.39388	3.10201	2.48577	2.49312	14.0126	-0.0348371	0.605531	-0.0575315	0.954122	0.978042
ENST00000257901	KRT85	2.60485	2.53794	1.02998	1.45905	50.197	-1.02292	0.331596	-3.08483	0.00203672	0.0288274	KRT85	100.616	98.6386	67.0148	62.8768	537.281	-0.461077	0.0997872	-4.6206	3.83e-06	2.83e-05
ENST00000257904	CDK4	69.5376	69.0088	72.8066	69.4802	1412.04	0.0624662	0.060272	1.03641	0.300013	0.764163	CDK4	214.752	231.948	215.363	213.768	1076.2	0.126931	0.0721716	1.75875	0.0786207	0.186504
ENST00000257910	TSPAN31	5.57678	5.44323	5.73899	5.36748	219.386	0.0353046	0.153491	0.230012	0.818083	0.972026	TSPAN31	73.5703	75.4839	35.7309	30.1994	147.593	-1.0848	0.19279	-5.62686	1.84e-08	1.8e-07
ENST00000257915	TFCP2	5.04437	5.25879	4.77215	5.07527	206.757	-0.0412206	0.158274	-0.260438	0.794526	0.968264	TFCP2	21.0722	23.1937	23.3445	24.0874	149.265	0.20334	0.182291	1.11547	0.26465	0.456713
ENST00000257934	ESPL1	8.90287	9.68037	9.29869	9.10772	659.869	0.0102535	0.0897803	0.114207	0.909074	0.985351	ESPL1	8.53506	7.60952	10.1012	10.3704	256.399	0.487766	0.140625	3.46857	0.000523238	0.00263191
ENST00000257940	ZC3H10	2.03121	1.83604	1.82865	2.0055	147.833	0.0116338	0.188319	0.0617772	0.95074	0.993183	ZC3H10	6.41415	6.62612	3.30242	3.3122	27.4173	-0.845179	0.438423	-1.92777	0.053884	0.139019
ENST00000257981	KCNH3	2.82349	2.25463	2.06219	1.67053	95.4313	-0.420076	0.241422	-1.74	0.0818582	0.422238	KCNH3	0.3213	0.388587	0.389238	0.546546	5.82502	0.55063	0.967466	0.569146	0.569257	0.739646
ENST00000258052	SMPD2	6.79372	5.87146	7.17145	6.73451	120.669	0.158852	0.208247	0.762805	0.44558	0.860197	SMPD2	7.73262	7.79332	6.7766	10.5948	45.5044	0.298613	0.345193	0.865061	0.387005	0.585479
ENST00000258080	HTRA2	8.51668	8.27495	8.90633	7.84241	214.28	0.0203356	0.156833	0.129664	0.896832	0.983978	HTRA2	22.3368	17.6115	20.8011	18.2779	119.227	0.0590757	0.216695	0.272621	0.785145	0.885868
ENST00000258083	PRADC1	13.7198	15.4434	15.6077	16.6665	180.597	0.170292	0.170769	0.997206	0.318664	0.781674	PRADC1	8.14393	9.32711	11.2113	12.144	25.597	0.567827	0.443184	1.28124	0.200108	0.373307
ENST00000258091	CCT7	333.379	336.196	362.861	362.271	6946.48	0.139039	0.0263926	5.26809	1.38e-07	5.55e-06	CCT7	559.44	556.211	652.113	643.609	4362.62	0.363029	0.0352085	10.3108	6.29e-25	1.62e-23
ENST00000258105	MRPL53	62.4423	66.0641	49.755	49.9637	304.83	-0.341857	0.131063	-2.60835	0.00909789	0.0937427	MRPL53	380.279	390.779	365.841	414.487	572.882	0.159376	0.098267	1.62186	0.104833	0.233424
ENST00000258111	KCNMB4	0.450432	0.415765	0.378472	0.467496	21.7694	-0.01005	0.481266	-0.0208825	0.983339	0.997793	KCNMB4	1.98839	1.002	0	0.402659	2.21977	-2.74295	2.06586	-1.32775	0.18426	NA
ENST00000258168	BCO1	2.45594	3.12866	2.6805	3.06941	74.2247	0.0661644	0.266625	0.248156	0.804014	0.968753	BCO1	3.18069	4.10325	2.77433	4.01923	26.0876	-0.0137486	0.445232	-0.0308796	0.975366	0.988539
ENST00000258169	MPHOSPH6	22.4894	19.8907	18.7901	17.7399	234.059	-0.190286	0.151393	-1.2569	0.208791	0.665798	MPHOSPH6	68.7236	69.2631	82.7281	93.0143	164.488	0.509405	0.174834	2.91366	0.00357224	0.0144771
ENST00000258198	DYNC1LI2	31.5654	31.4696	31.4122	33.1095	1487.66	0.0576725	0.0589248	0.978747	0.327705	0.788488	DYNC1LI2	65.4915	60.4458	58.4336	55.1692	386.62	-0.00600979	0.11568	-0.0519519	0.958567	0.979923
ENST00000258200	FBXL8	1.30349	0.802112	0.579837	0.708646	14.8844	-0.684574	0.607189	-1.12745	0.259553	0.728428	FBXL8	2.97726	2.25048	2.47967	2.9392	8.48241	0.255575	0.791086	0.323068	0.746644	0.863053
ENST00000258201	FHOD1	12.3446	12.6012	11.705	12.1725	501.749	-0.0391014	0.101329	-0.385887	0.69958	0.956291	FHOD1	11.6587	11.8105	9.56081	12.2043	173.031	0.0485659	0.175282	0.277073	0.781724	0.883717
ENST00000258214	CCDC102A	2.85612	2.4864	2.37493	2.20207	64.9904	-0.199105	0.280382	-0.710119	0.47763	0.873453	CCDC102A	5.18788	4.7185	2.91249	3.07485	28.2851	-0.538235	0.425259	-1.26566	0.205634	0.381091
ENST00000258229	PCNX2	4.95956	4.70974	4.78355	4.74142	389.594	0.0023335	0.115199	0.0202562	0.983839	0.997793	PCNXL2	0.716452	0.754898	2.28822	2.73024	46.296	1.92203	0.356818	5.38658	7.18e-08	6.57e-07
ENST00000258243	URB2	13.3499	13.8599	13.087	13.8362	817.295	0.00876908	0.0799227	0.10972	0.912632	0.985986	URB2	10.503	10.0792	10.2897	10.4311	208.013	0.138785	0.153773	0.902526	0.366777	0.564402
ENST00000258281	TAF5L	9.00692	8.84897	8.3688	7.96337	286.697	-0.104651	0.134243	-0.779566	0.435647	0.855335	TAF5L	12.0519	9.88389	10.1629	9.47514	80.5849	-0.0359612	0.254344	-0.141388	0.887563	0.94354
ENST00000258301	STX6	11.23	10.8047	11.6805	10.9375	579.043	0.0617181	0.0950774	0.649136	0.51625	0.89324	STX6	41.2103	44.2844	36.3686	33.4918	130.662	-0.160126	0.19736	-0.811343	0.417169	0.613012
ENST00000258341	LAMC1	57.9421	58.4857	61.4805	58.2189	5047.6	0.0640157	0.0329237	1.94437	0.0518514	0.323167	LAMC1	56.142	56.7135	22.5313	24.0695	824.923	-1.149	0.0850868	-13.5039	1.48e-41	6.4e-40
ENST00000258381	SP110	2.69476	2.12203	2.64052	2.42394	64.6355	0.096337	0.283234	0.340132	0.733757	0.961608	SP110	3.41623	4.32841	4.72981	4.86241	2.8721	-0.576648	1.46602	-0.393341	0.694067	NA
ENST00000258383	MRPL44	23.756	20.9489	22.632	20.7033	400.8	-0.0208759	0.117819	-0.177186	0.859362	0.979578	MRPL44	85.1054	79.013	82.0235	79.2098	354.282	0.125472	0.119832	1.04707	0.295069	0.492438
ENST00000258399	USP37	6.1121	5.95903	5.7338	5.58946	505.767	-0.0682387	0.100852	-0.676621	0.498646	0.884952	USP37	6.89538	7.59431	3.70305	4.23224	71.2898	-0.729299	0.272612	-2.67522	0.00746795	0.0273729
ENST00000258416	EIF4E2	41.4932	46.2236	46.5888	48.8664	477.647	0.146027	0.106389	1.37259	0.169881	0.611456	EIF4E2	118.451	113.369	126.291	113.895	381.033	0.176191	0.115982	1.51913	0.128731	0.27309
ENST00000258418	CAB39	17.223	17.265	17.3608	16.5918	706.385	0.00146354	0.0852868	0.0171603	0.986309	0.997979	CAB39	53.2666	50.8051	46.4812	48.8505	223.787	0.0222372	0.149167	0.149076	0.881494	0.94066
ENST00000258424	COX5B	123.407	131.929	104.254	98.9211	852.03	-0.305629	0.0795765	-3.84069	0.00012269	0.00259438	COX5B	931.151	962.385	914.981	917.688	1575.8	0.106475	0.058689	1.81422	0.0696433	0.169811
ENST00000258428	REV1	4.75008	4.85351	4.90558	4.72771	245.337	0.0284926	0.144755	0.196833	0.843958	0.976002	REV1	5.22925	4.70963	3.70663	3.98797	72.6821	-0.252892	0.263519	-0.959673	0.33722	0.535834
ENST00000258436	MFSD9	2.2541	2.08418	1.94435	2.24182	121.613	-0.027451	0.20756	-0.132255	0.894782	0.983622	MFSD9	6.7538	5.771	3.37947	4.28144	30.6529	-0.557535	0.413042	-1.34983	0.177071	0.343706
ENST00000258439	TMEM127	10.5246	9.95031	10.3238	10.6919	700.908	0.0616475	0.0862964	0.71437	0.474999	0.872108	TMEM127	49.1249	49.8052	24.0883	20.6067	109.358	-1.00721	0.223529	-4.50592	6.61e-06	4.72e-05
ENST00000258455	MRPS9	24.5619	26.0055	27.4049	24.7297	391.518	0.0680725	0.116763	0.582998	0.559895	0.908516	MRPS9	52.3709	48.1769	51.5221	56.5858	272.292	0.250637	0.135866	1.84474	0.0650757	0.161365
ENST00000258457	C2orf49	4.40038	3.97263	4.09803	3.68571	199.721	-0.0812647	0.163337	-0.497527	0.618818	0.931901	C2orf49	32.097	37.7909	35.9767	28.4291	102.671	0.0479785	0.227003	0.211357	0.832609	0.913172
ENST00000258459	ANKRD36B	3.13988	3.03053	2.71923	2.35067	181.23	-0.259384	0.171352	-1.51375	0.130089	0.536365	ANKRD36B	0.205746	0.155521	0.685438	0.374982	6.97785	1.86524	0.953193	1.95683	0.0503677	0.132429
ENST00000258484	EPC2	5.114	5.99763	5.35487	5.24637	227.23	-0.0437809	0.154418	-0.283522	0.776776	0.968264	EPC2	10.0898	10.5166	5.64149	6.81078	86.9427	-0.616577	0.245798	-2.50847	0.0121256	0.0411571
ENST00000258534	DRAM1	8.12452	8.84687	8.455	7.84602	294.049	-0.0340992	0.134155	-0.254177	0.799359	0.968264	DRAM1	73.1025	68.077	24.7967	27.0018	148.489	-1.28256	0.194504	-6.59398	4.28e-11	5.21e-10
ENST00000258538	SLC41A2	8.08187	7.3101	7.43531	7.64728	365.458	-0.00526642	0.120571	-0.043679	0.96516	0.994818	SLC41A2	24.7768	26.3178	9.56384	8.264	126.612	-1.34544	0.212896	-6.31971	2.62e-10	3e-09
ENST00000258613	THSD1	3.4027	2.75444	3.85217	3.53961	110.606	0.287667	0.219741	1.30912	0.190494	0.645012	THSD1	1.8787	1.23486	0.890587	1.29021	15.0083	-0.336012	0.5926	-0.567014	0.570704	0.740672
ENST00000258648	MED4	10.4777	9.96968	11.1817	10.9481	258.789	0.138106	0.141079	0.978923	0.327618	0.788488	MED4	50.5198	59.489	32.7868	37.5815	159.216	-0.507035	0.184582	-2.74693	0.00601562	0.0227565
ENST00000258662	NUDT15	23.2759	23.6544	23.5173	23.4617	490.608	0.0255336	0.102083	0.250125	0.802491	0.96851	NUDT15	59.4091	64.58	80.1963	71.1528	148.715	0.429752	0.184589	2.32816	0.0199039	0.0620662
ENST00000258729	IGF2BP3	9.9615	9.36837	8.89457	10.1225	441.785	0.000500566	0.111534	0.00448802	0.996419	0.999825	IGF2BP3	26.5633	23.2588	30.724	30.6689	212.306	0.425271	0.154906	2.74535	0.00604471	0.0228456
ENST00000258739	KDELR2	64.7942	65.0553	66.1903	65.3947	1963.54	0.0431921	0.0504369	0.85636	0.391799	0.834725	KDELR2	465.817	453.593	268.834	281.595	1014.6	-0.611154	0.0750174	-8.14683	3.74e-16	6.33e-15
ENST00000258742	NUP42	13.7845	13.8879	14.4387	14.772	240.951	0.10209	0.145829	0.700067	0.483885	0.878548	NUPL2	19.7429	21.3902	23.3195	26.1871	127.384	0.396615	0.199904	1.98403	0.0472522	0.12599
ENST00000258770	TBRG4	57.0122	57.8907	57.4138	60.0992	1394.77	0.0564477	0.0606855	0.930168	0.352284	0.804309	TBRG4	57.3513	56.9122	72.1503	74.7759	546.42	0.515927	0.0979918	5.265	1.4e-07	1.24e-06
ENST00000258772	DDX56	60.5544	58.9776	66.2187	66.889	1591.63	0.179232	0.0563405	3.18123	0.00146651	0.0217821	DDX56	100.383	100.658	109.894	122.896	787.2	0.348942	0.086381	4.03957	5.35e-05	0.000324255
ENST00000258774	HUS1	8.53332	7.09267	8.38164	8.48589	263.478	0.134316	0.145135	0.925456	0.354729	0.80551	HUS1	39.5192	36.0719	33.1214	28.9915	127.188	-0.16449	0.201299	-0.817139	0.413849	0.609725
ENST00000258796	TTYH3	9.94911	9.82963	5.70424	6.16283	409.05	-0.712945	0.114939	-6.20283	5.55e-10	3.01e-08	TTYH3	26.214	28.4315	6.6093	7.76062	117.034	-1.81099	0.231344	-7.82814	4.95e-15	7.85e-14
ENST00000258821	TTC5	5.9689	6.17564	5.78613	5.85228	303.642	-0.0373716	0.130155	-0.287132	0.774011	0.968264	TTC5	24.6741	28.5342	22.9933	21.9083	141.673	-0.089778	0.190083	-0.472311	0.636705	0.788817
ENST00000258884	ABHD17C	5.53791	5.91838	5.55987	5.11477	140.811	-0.07791	0.19205	-0.405675	0.684981	0.951769	ABHD17C	23.0568	23.2378	22.5507	16.192	93.5028	-0.163209	0.239839	-0.680495	0.496191	0.682423
ENST00000258886	IREB2	20.5072	21.5271	19.628	20.7726	1405.08	-0.0331438	0.0616843	-0.537313	0.591051	0.92269	IREB2	49.1419	48.4351	32.3053	33.9814	517.481	-0.464543	0.101301	-4.58576	4.52e-06	3.32e-05
ENST00000258888	ALPK3	0.209593	0.247009	0.240485	0.259708	28.1679	0.155609	0.421123	0.369509	0.711748	0.959777	ALPK3	0.109481	0.110341	0.265261	0	3.0155	0.423062	1.51636	0.278999	0.780246	0.883006
ENST00000258930	CIB2	8.83151	10.194	9.59776	9.59718	154.447	0.0368503	0.184734	0.199477	0.841889	0.976002	CIB2	14.5142	12.3776	8.1153	11.7568	28.9439	-0.240612	0.423135	-0.56864	0.5696	0.739852
ENST00000258955	RSAD1	21.0342	21.9607	18.0062	18.2605	526.738	-0.221477	0.0992827	-2.23077	0.0256963	0.199311	RSAD1	19.2091	17.1383	13.5428	11.8611	90.2438	-0.398891	0.241548	-1.6514	0.0986576	0.222231
ENST00000258975	TACO1	34.6994	34.0762	35.2955	34.785	541.301	0.0511496	0.0971845	0.526314	0.59867	0.924515	TACO1	68.4219	62.3466	66.7091	64.3441	254.136	0.159583	0.1402	1.13825	0.255016	0.444609
ENST00000258991	TEX2	7.91885	8.74627	9.73475	8.75071	495.968	0.173603	0.105915	1.63908	0.101197	0.470952	TEX2	4.41864	4.02036	4.68383	3.87746	63.0829	0.174476	0.283033	0.616451	0.537597	0.71401
ENST00000259006	LIMD2	1.89448	1.8176	2.33586	2.20413	71.0656	0.314488	0.265999	1.18229	0.23709	0.703961	LIMD2	22.4672	19.8822	11.2854	9.98721	26.9833	-0.809305	0.441445	-1.83331	0.0667567	0.164305
ENST00000259008	BRIP1	7.33092	7.2507	7.30304	7.55928	649.474	0.051548	0.0887942	0.580533	0.561555	0.909918	BRIP1	6.07342	6.28957	4.86008	4.67136	90.0679	-0.169766	0.23696	-0.716434	0.473723	0.663826
ENST00000259021	KAT7	11.106	11.3546	11.2808	11.5671	1162.1	0.0487051	0.0661145	0.736678	0.461318	0.868461	KAT7	42.3712	38.2268	43.6033	46.777	341.94	0.298654	0.123126	2.42559	0.0152836	0.0496325
ENST00000259037	NDUFB5	10.587	12.5326	12.7799	13.3543	557.794	0.200876	0.102766	1.95471	0.0506178	0.318864	NDUFB5	131.823	132.486	157.466	161.064	366.658	0.417202	0.117011	3.5655	0.000363168	0.00190245
ENST00000259056	GALNT5	0.545108	0.576683	0.538069	0.649705	64.4161	0.106515	0.281203	0.378782	0.70485	0.958142	GALNT5	9.69868	9.77482	26.4587	26.2671	224.179	1.58452	0.155533	10.1877	2.25e-24	5.61e-23
ENST00000259154	KCTD3	25.7214	24.5003	23.5428	24.6126	1065.64	-0.0365788	0.0701818	-0.521201	0.602227	0.925203	KCTD3	28.3498	25.9905	23.9996	24.1744	273.833	-0.0473484	0.135332	-0.349869	0.726437	0.849922
ENST00000259199	CBWD2	15.7891	16.7277	16.2667	15.2886	315.516	-0.0192627	0.128622	-0.149762	0.880952	0.981012	CBWD2	1.58568	3.55139	2.34784	4.06737	14.8928	0.473285	0.617038	0.767028	0.443065	0.636347
ENST00000259229	CCDC115	7.57596	7.52943	6.41131	7.30133	137.37	-0.115512	0.194901	-0.59267	0.553402	0.906514	CCDC115	52.1952	44.0323	53.3957	53.5537	121.652	0.247758	0.204896	1.20919	0.226589	0.409393
ENST00000259239	IMP4	29.2506	29.4188	26.8309	26.5679	728.082	-0.111765	0.0836792	-1.33564	0.181667	0.631227	IMP4	89.9216	92.5557	93.2903	92.6946	357.636	0.157955	0.118201	1.33632	0.181444	0.349216
ENST00000259241	HS6ST1	6.13423	6.77251	5.57029	5.81861	276.434	-0.156442	0.138463	-1.12984	0.258543	0.7272	HS6ST1	4.91049	5.1197	3.89749	4.11476	24.3512	-0.22038	0.454432	-0.484958	0.627706	0.782113
ENST00000259253	UGGT1	16.0688	16.8275	16.4729	16.1889	1901.67	0.0137222	0.0522658	0.262546	0.7929	0.968264	UGGT1	25.6892	25.7556	9.00018	7.66735	338.098	-1.47633	0.133085	-11.0931	1.36e-28	3.92e-27
ENST00000259324	LRRC8A	18.6295	17.8149	17.2562	17.437	885.587	-0.0470142	0.0763114	-0.616083	0.53784	0.901927	LRRC8A	24.057	24.9386	37.1584	37.9991	330.493	0.740966	0.123764	5.98694	2.14e-09	2.28e-08
ENST00000259335	ECPAS	31.7654	32.8585	33.0205	33.4021	2611.25	0.0636497	0.0442096	1.43973	0.149945	0.576042	KIAA0368	21.6337	20.4821	25.9155	28.6752	644.971	0.499828	0.0934057	5.35115	8.74e-08	7.91e-07
ENST00000259339	TOR1B	13.0428	14.2957	13.3474	15.6477	415.889	0.108941	0.117276	0.928926	0.352928	0.804415	TOR1B	34.7968	30.06	12.0441	13.3381	97.5583	-1.25273	0.241047	-5.19705	2.02e-07	1.76e-06
ENST00000259351	RALGPS1	1.11024	1.17474	1.19448	1.14464	78.9118	0.0578327	0.252909	0.22867	0.819125	0.972173	RALGPS1	1.87415	1.76294	1.81635	0.910863	11.4153	-0.263397	0.685336	-0.384333	0.700732	0.835164
ENST00000259392	SLC31A2	1.56513	1.89704	2.07226	1.8893	34.4997	0.218446	0.381106	0.573188	0.566517	0.912455	SLC31A2	9.2467	9.80978	11.7915	10.0524	43.0987	-0.10528	0.340551	-0.309146	0.757211	0.868616
ENST00000259400	STX17	8.67631	8.69967	8.11444	8.02244	621.802	-0.0826949	0.0906251	-0.912495	0.361508	0.809669	STX17	22.3529	19.5091	22.8918	23.7996	89.75	0.248737	0.237058	1.04927	0.294055	0.49144
ENST00000259407	BAAT	1.88749	1.62124	1.89692	2.26995	69.9249	0.272049	0.271988	1.00022	0.317203	0.78143	BAAT	1.66492	2.01359	3.22714	2.62981	13.3768	0.872167	0.624247	1.39715	0.162368	0.32211
ENST00000259457	PSMB7	151.977	155.873	167.768	171.172	1716.34	0.162844	0.0543148	2.99816	0.00271617	0.0360053	PSMB7	533.634	564.917	720.431	738.741	2354.66	0.55046	0.0495478	11.1097	1.13e-28	3.27e-27
ENST00000259467	PDCL	13.4618	13.1091	11.5562	13.5046	419.817	-0.0603719	0.114904	-0.525412	0.599297	0.924605	PDCL	59.1892	54.7604	50.1372	56.4659	222.514	0.0614871	0.150752	0.407869	0.68337	0.821808
ENST00000259512	DERL1	29.8084	30.1377	27.749	29.12	1011.55	-0.0519796	0.0713235	-0.728787	0.466132	0.870289	DERL1	145.564	140	71.8809	64.3452	344.088	-0.907235	0.126147	-7.1919	6.39e-13	8.88e-12
ENST00000259526	CCN3	1.06171	1.26073	1.02329	1.10849	29.563	-0.0995185	0.412104	-0.241489	0.809176	0.969577	NOV	6.62796	9.2341	3.30623	2.36858	25.1849	-1.4001	0.484537	-2.88957	0.00385768	0.0154469
ENST00000259569	RANBP6	21.691	20.4643	22.0988	20.9104	1056.15	0.0529571	0.0710742	0.745096	0.456214	0.866374	RANBP6	6.86488	6.98225	5.11194	5.50969	89.7828	-0.235162	0.237381	-0.99065	0.321856	0.521171
ENST00000259605	RNF38	6.491	6.55529	7.38694	7.3035	378.597	0.195276	0.116214	1.68032	0.0928949	0.450695	RNF38	7.02692	6.8097	4.09267	6.73184	41.0905	-0.252637	0.360133	-0.701508	0.482986	0.671498
ENST00000259632	DCTN3	48.6562	44.1143	45.9123	49.2069	419.425	0.0601	0.113351	0.530213	0.595964	0.923742	DCTN3	203.168	215.322	202.16	205.486	505.856	0.091969	0.101449	0.906556	0.364642	0.562234
ENST00000259667	HINT2	59.3059	59.681	60.5171	62.2932	423.082	0.0696688	0.110062	0.632999	0.526735	0.898517	HINT2	122.963	129.522	122.584	142.66	279.069	0.216278	0.135998	1.5903	0.111766	0.244902
ENST00000259708	KLC4	3.55695	3.192	2.61756	3.51591	93.311	-0.113917	0.241507	-0.471691	0.637147	0.936651	KLC4	5.68111	5.94593	3.17647	4.11509	39.2798	-0.561722	0.364269	-1.54205	0.123061	0.263589
ENST00000259746	TMEM63B	8.98955	8.61974	10.1913	10.0325	338.587	0.223747	0.123245	1.81547	0.0694511	0.380593	TMEM63B	10.6231	12.6454	7.7013	7.01266	103.328	-0.540228	0.22572	-2.39336	0.016695	0.0534317
ENST00000259808	RIPK1	6.49037	6.21051	6.59551	6.31283	282.51	0.0474045	0.135234	0.350537	0.725936	0.961423	RIPK1	12.3422	13.798	12.0621	14.9962	119.45	0.166469	0.209016	0.79644	0.425776	0.619779
ENST00000259818	TUBB2B	11.9474	12.7547	10.5998	10.7085	238.238	-0.189173	0.147816	-1.27978	0.200621	0.655574	TUBB2B	2.65863	3.94044	2.65242	3.61036	18.3321	0.111477	0.535202	0.20829	0.835003	0.914664
ENST00000259873	MRPS18B	54.4792	53.7753	58.6671	55.0581	836.72	0.0951575	0.0788296	1.20713	0.227383	0.691288	MRPS18B	131.634	135.386	148.684	169.772	502.751	0.387666	0.104936	3.6943	0.000220495	0.00119865
ENST00000259874	IER3	103.453	108.007	89.8187	91.5111	1308.95	-0.197723	0.0629235	-3.14227	0.00167642	0.0243775	IER3	204.766	210.42	358.853	347.99	584.991	0.910011	0.0957206	9.50694	1.96e-21	4.34e-20
ENST00000259883	PGBD1	4.1123	3.90124	4.30222	3.9971	136.341	0.0745807	0.194472	0.383503	0.701347	0.956291	PGBD1	2.66675	2.86108	1.77163	1.98592	24.8488	-0.409848	0.452656	-0.905431	0.365237	0.562871
ENST00000259895	GTF2H4	4.91649	5.01173	4.72322	5.15229	91.393	0.0163647	0.235921	0.0693649	0.944699	0.991238	GTF2H4	12.6534	12.2973	17.3363	19.2178	94.4025	0.65126	0.231849	2.80899	0.00496979	0.0192348
ENST00000259951	HLA-F	0.7178	1.21468	0.922428	0.709517	14.2101	-0.219776	0.614135	-0.357863	0.720446	0.960728	HLA-F	6.61296	5.55406	7.43902	8.8002	42.8454	0.579148	0.3429	1.68897	0.0912251	0.209294
ENST00000259953	NRM	8.5211	9.59163	8.49693	8.67592	166.896	-0.0528204	0.177324	-0.297876	0.765798	0.96685	NRM	33.203	37.2116	18.0202	19.6873	90.7435	-0.736763	0.241488	-3.05093	0.00228134	0.00973933
ENST00000259963	FAM8A1	3.47555	3.19875	2.86647	3.15514	161.677	-0.124435	0.180262	-0.690301	0.490005	0.882611	FAM8A1	7.58283	8.49151	3.47034	4.29958	30.7923	-0.975039	0.418273	-2.33111	0.0197477	0.0616724
ENST00000259983	C6orf52	2.11228	1.98017	3.2234	4.07141	19.046	0.857952	0.52175	1.64437	0.100099	0.469565	C6orf52	11.9042	3.69157	8.87462	7.78828	16.1534	0.20438	0.611569	0.33419	0.738237	0.857734
ENST00000260045	THAP12	32.3831	32.6626	31.2938	31.2618	1200.28	-0.0322746	0.0647624	-0.498354	0.618235	0.931736	PRKRIR	12.9859	12.627	15.5102	13.4449	138.339	0.315379	0.190268	1.65756	0.0974072	0.220054
ENST00000260102	MRPL15	44.9949	46.1272	41.848	40.9952	810.505	-0.113378	0.0794816	-1.42646	0.153735	0.581541	MRPL15	121.789	115.636	182.005	171.974	579.296	0.719917	0.0962896	7.47658	7.63e-14	1.12e-12
ENST00000260116	TTPA	0.837982	0.6207	0.837567	1.03692	23.6833	0.385851	0.465045	0.829706	0.406705	0.842603	TTPA	3.25437	0.504604	1.81962	1.52083	7.10399	-0.0759183	0.904861	-0.0839005	0.933136	0.968794
ENST00000260118	GGH	66.5274	63.0542	60.6697	62.6854	850.767	-0.0470116	0.0783779	-0.599807	0.548635	0.904548	GGH	217.316	221.889	74.4994	65.4131	588.684	-1.51931	0.103356	-14.6998	6.46e-49	3.42e-47
ENST00000260129	TGS1	13.8723	12.8313	13.8863	12.7596	643.851	0.0208988	0.0921348	0.226829	0.820557	0.972453	TGS1	15.2567	13.9786	8.40124	9.61567	131.237	-0.558922	0.199229	-2.80543	0.00502501	0.0194008
ENST00000260197	SORL1	3.40025	3.70099	3.55753	3.66365	419.436	0.0482159	0.112077	0.430204	0.667047	0.946628	SORL1	4.65214	4.43522	4.30303	3.6283	123.118	-0.0338322	0.204307	-0.165595	0.868476	0.934247
ENST00000260210	BUD13	10.3267	10.4753	8.38395	7.71276	217.801	-0.345924	0.15522	-2.22861	0.0258398	0.199594	BUD13	8.65703	9.85811	9.12552	10.2454	77.5471	0.183924	0.255505	0.719844	0.471621	0.662312
ENST00000260227	MMP7	73.7586	75.1429	68.6961	74.7916	881.853	-0.0293857	0.0777155	-0.378119	0.705342	0.958262	MMP7	357.09	346.234	113.359	93.7427	781.048	-1.63711	0.0944885	-17.326	2.99e-67	2.44e-65
ENST00000260247	DCUN1D5	3.87479	3.64898	3.21466	3.09019	472.15	-0.230966	0.105576	-2.18767	0.0286937	0.21509	DCUN1D5	65.1889	66.5885	61.1862	63.8648	202.773	0.0857182	0.15599	0.549512	0.582654	0.751391
ENST00000260257	FDXACB1	1.56132	1.9442	2.08213	1.58989	53.6816	0.0909945	0.312497	0.291186	0.770909	0.967391	FDXACB1	1.00375	1.91086	1.75644	1.21959	11.9323	0.18278	0.672346	0.271855	0.785734	0.886159
ENST00000260270	FDX1	9.01921	9.46066	10.4547	10.0533	330.575	0.174275	0.125007	1.39412	0.163281	0.598375	FDX1	59.3815	62.516	61.3989	62.4997	150.619	0.186443	0.180752	1.03149	0.302313	0.500477
ENST00000260327	CTDSPL2	7.34236	7.17691	7.06847	7.19862	499.161	-0.00124153	0.101358	-0.012249	0.990227	0.998282	CTDSPL2	19.1158	16.8577	19.9013	19.2343	115.547	0.269241	0.208606	1.29067	0.19682	0.369454
ENST00000260356	THBS1	40.0987	40.4222	49.211	48.0351	3735.46	0.296314	0.0366159	8.0925	5.85e-16	5.11e-14	THBS1	82.6795	79.9115	140.731	141.364	1711.34	0.934518	0.0570651	16.3763	2.82e-60	1.95e-58
ENST00000260361	NDUFAF1	6.22774	6.71483	7.23761	6.54129	108.725	0.114377	0.217708	0.525366	0.599329	0.924605	NDUFAF1	18.3029	15.2292	11.6021	11.8951	61.1049	-0.2994	0.290259	-1.0315	0.302308	0.500477
ENST00000260363	KIF23	70.1732	72.9795	75.4257	72.7416	2924.12	0.0737122	0.0425556	1.73214	0.083249	0.42476	KIF23	47.1931	50.2669	50.2341	47.7403	623.071	0.146108	0.0930312	1.57053	0.116292	0.252275
ENST00000260372	HAUS2	11.3585	11.0871	11.3559	12.1318	485.601	0.0895112	0.103505	0.8648	0.387148	0.830046	HAUS2	40.5716	37.3085	50.2266	46.0573	134.551	0.457576	0.192861	2.37257	0.017665	0.0560727
ENST00000260379	RPLP1	663.425	661.656	467.468	464.667	7133.16	-0.483432	0.026329	-18.3612	2.69e-75	1.38e-72	RPLP1	1636.67	1681.51	2029.33	1953.74	2748.04	0.405469	0.045393	8.93241	4.17e-19	8.25e-18
ENST00000260383	TUBGCP4	3.09139	3.59084	3.41088	3.04954	92.7022	-0.0246528	0.237042	-0.104002	0.917168	0.986019	TUBGCP4	10.2251	7.36101	9.22721	12.4239	86.685	0.459352	0.255015	1.80127	0.0716597	0.173804
ENST00000260385	RMDN3	5.15625	5.31227	4.81904	4.68489	168.88	-0.115421	0.174674	-0.660775	0.508757	0.890874	RMDN3	9.92078	9.40173	9.3278	7.37637	55.3056	-0.0275143	0.305278	-0.0901288	0.928185	0.96578
ENST00000260386	ITPKA	0.761216	0.626856	0.460339	0.51785	11.6246	-0.480877	0.674057	-0.713408	0.475594	0.87213	ITPKA	0.301924	0.456442	0.731531	0.183424	2.72885	0.160935	1.49486	0.107659	0.914266	NA
ENST00000260403	TMEM62	7.60736	7.63721	7.71997	7.2928	220.781	0.00192923	0.152794	0.0126263	0.989926	0.998282	TMEM62	7.46805	6.87218	5.63808	4.73422	51.3371	-0.326345	0.316285	-1.03181	0.302163	0.500401
ENST00000260408	ADAM10	22.4547	22.5929	21.5244	21.6548	2653.27	-0.0370733	0.0432933	-0.856331	0.391815	0.834725	ADAM10	116.951	119.932	26.9383	24.3049	692.009	-2.09567	0.101042	-20.7407	1.49e-95	1.9e-93
ENST00000260443	RSL24D1	96.3407	99.8837	98.0658	96.4477	1989.63	0.0114075	0.0507407	0.224819	0.82212	0.972658	RSL24D1	363.338	361.457	428.786	438.874	884.742	0.3956	0.0778872	5.07914	3.79e-07	3.21e-06
ENST00000260453	MNS1	5.19296	4.02538	3.82813	2.68987	85.9913	-0.476098	0.260408	-1.82828	0.0675077	0.376236	MNS1	7.45143	6.23466	9.87862	6.1497	47.8482	0.349441	0.33796	1.03397	0.30115	0.499242
ENST00000260505	TTLL7	0.614427	0.68608	0.55271	0.671107	54.2886	-0.0636209	0.306292	-0.207713	0.835453	0.97552	TTLL7	2.19687	1.89781	1.33069	2.00195	22.0541	-0.0930051	0.479591	-0.193926	0.846234	0.921751
ENST00000260508	KYAT3	9.27496	9.09447	7.69531	9.37266	173.333	-0.0819671	0.176526	-0.464333	0.642409	0.937899	CCBL2	16.2487	11.1235	17.8274	16.2039	92.409	0.449265	0.248168	1.81033	0.070245	0.170975
ENST00000260526	ARHGAP29	4.91116	5.11176	5.17332	5.43107	497.892	0.105406	0.102047	1.03291	0.301645	0.765938	ARHGAP29	11.2586	11.8476	11.9009	12.3384	195.471	0.196954	0.158821	1.2401	0.214939	0.393742
ENST00000260563	RTCA	14.4899	15.7145	15.8138	14.8545	251.735	0.0460397	0.144246	0.319175	0.749594	0.964026	RTCA	32.6851	32.7566	35.1473	38.3748	173.937	0.321258	0.168634	1.90506	0.0567723	0.144663
ENST00000260570	IFT172	4.45325	4.64996	4.9247	4.84655	274.577	0.126209	0.136834	0.922348	0.356347	0.807213	IFT172	2.86491	3.36864	3.18147	2.41734	68.3178	-0.0357954	0.274393	-0.130453	0.896208	0.948826
ENST00000260585	SELENOI	18.7428	18.2659	18.9303	19.8274	1647.75	0.0906571	0.056102	1.61593	0.106109	0.482162	EPT1	68.8924	68.7265	28.4569	25.1332	247.078	-1.1909	0.149176	-7.98318	1.43e-15	2.34e-14
ENST00000260599	KHK	3.99951	4.37215	4.13788	4.57316	111.044	0.081387	0.215789	0.37716	0.706055	0.958262	KHK	15.8804	15.299	10.7508	14.7552	55.7476	-0.138541	0.305278	-0.453819	0.649959	0.797855
ENST00000260643	PREB	27.3933	27.4689	31.4502	28.3873	657.894	0.14927	0.0902841	1.65334	0.0982614	0.463592	PREB	46.7295	47.9373	46.7035	47.0445	261.618	0.123412	0.136953	0.901121	0.367524	0.565099
ENST00000260649	SLC3A1	0.41286	0.302751	0.601298	0.282946	12.8156	0.329218	0.653776	0.503564	0.614568	0.929143	SLC3A1	1.01596	1.33112	0.98463	0.493772	8.61597	-0.576006	0.803536	-0.71684	0.473473	0.663727
ENST00000260665	LRPPRC	65.9888	65.0578	65.0956	65.2029	4651.76	0.0157766	0.032572	0.484362	0.628129	0.933964	LRPPRC	114.525	115.927	119.69	113.25	2135.25	0.161995	0.0512458	3.16113	0.00157156	0.00702384
ENST00000260731	KIF11	43.2868	42.6496	42.6885	43.0627	2321.48	0.0209241	0.0464288	0.45067	0.652227	0.941869	KIF11	43.8255	40.7157	49.1802	47.1637	626.387	0.338598	0.0930936	3.63718	0.000275644	0.00147451
ENST00000260746	ARL3.00	10.039	9.35653	10.244	9.12046	400.594	0.0217091	0.116417	0.186477	0.852071	0.977985	ARL3	187.75	155.695	183.905	192.347	431.005	0.281536	0.116028	2.42646	0.015247	0.0495528
ENST00000260762	EXOC6	13.0695	13.9402	11.5799	13.1997	497.385	-0.100265	0.105709	-0.948497	0.342877	0.799693	EXOC6	25.4484	21.199	17.8265	19.7724	218.388	-0.195815	0.157528	-1.24305	0.213849	0.392442
ENST00000260803	DBR1	9.48576	8.8714	8.32387	7.49497	245.094	-0.190677	0.14719	-1.29545	0.195165	0.6499	DBR1	13.8164	14.3116	15.6529	16.1656	107.515	0.257575	0.215308	1.19631	0.231577	0.414717
ENST00000260810	TOPBP1	25.4617	26.6947	26.0304	25.9377	1617.01	0.0188265	0.0565231	0.333076	0.739077	0.961733	TOPBP1	14.9978	14.24	15.067	14.3338	294.371	0.144678	0.130157	1.11157	0.266323	0.458579
ENST00000260818	DNAJC13	12.5413	12.1614	12.2973	13.2175	1049.81	0.0707064	0.0710672	0.994923	0.319774	0.781674	DNAJC13	12.5659	11.5076	10.299	10.895	331.295	-0.0473421	0.124581	-0.380012	0.703937	0.836566
ENST00000260947	BARD1	6.41458	6.54855	6.65209	6.13412	380.218	0.00421095	0.1172	0.0359298	0.971338	0.995175	BARD1	9.4941	10.3811	7.81241	6.42078	87.6898	-0.324972	0.243349	-1.33542	0.18174	0.349678
ENST00000260952	ASNSD1	18.574	18.0309	18.4244	19.1637	482.26	0.0622798	0.103395	0.602346	0.546944	0.90402	ASNSD1	7.90098	8.72658	8.52268	6.96982	86.293	0.0266493	0.241828	0.110199	0.912251	0.957199
ENST00000260970	PPIG	10.6696	10.8362	9.66395	9.33299	693.717	-0.154922	0.0861132	-1.79905	0.0720113	0.390222	PPIG	17.8137	17.7675	20.015	18.9527	186.84	0.23239	0.162122	1.43343	0.151736	0.307618
ENST00000261015	WDR12	6.87043	7.17277	6.81949	7.29874	614.922	0.0317351	0.0924643	0.343214	0.731437	0.961608	WDR12	44.0924	44.6043	44.2472	45.9774	249.984	0.143715	0.140156	1.02539	0.305178	0.504181
ENST00000261023	ITGAV	42.0842	43.4754	39.968	42.7702	3193.01	-0.0243278	0.0421845	-0.5767	0.564142	0.91096	ITGAV	103.793	105.143	20.1923	20.8975	838.839	-2.21665	0.0930644	-23.8185	2.15e-125	4.59e-123
ENST00000261024	SLC40A1	1.92307	1.73306	1.58651	1.70845	64.4691	-0.12603	0.28033	-0.449576	0.653016	0.942337	SLC40A1	1.70632	1.47404	0.738257	0.592353	7.96364	-1.04887	0.844957	-1.24133	0.214485	0.393318
ENST00000261038	SLC49A4	7.94556	8.0682	7.1443	7.83929	277.508	-0.0718831	0.137232	-0.523805	0.600414	0.924974	DIRC2	28.6819	27.7331	9.52444	6.72222	112.143	-1.64978	0.235561	-7.00363	2.49e-12	3.32e-11
ENST00000261167	WBP11	21.6739	22.6362	22.6489	21.7077	1094.94	0.0255538	0.0689415	0.370658	0.710892	0.959656	WBP11	65.4679	66.3101	78.9163	76.1158	612.009	0.374192	0.0924438	4.04778	5.17e-05	0.000314322
ENST00000261183	OSBPL8	16.7317	16.9238	16.8659	15.83	1288.37	-0.0176954	0.0636819	-0.277872	0.781111	0.968264	OSBPL8	21.6844	23.1959	18.493	17.0258	234.583	-0.190056	0.146006	-1.3017	0.193019	0.364363
ENST00000261191	INTS13	25.3161	25.1288	25.4763	27.9066	737.402	0.105713	0.0849584	1.24429	0.213393	0.671983	ASUN	26.2208	26.824	24.2418	27.5474	242.662	0.09131	0.144875	0.630269	0.528518	0.705812
ENST00000261196	SLCO1B3	15.0201	15.5086	16.9355	16.7866	492.093	0.167566	0.102039	1.64217	0.100555	0.469917	SLCO1B3	1.58618	1.29889	0.360295	0.481814	8.88781	-1.76673	0.852928	-2.07137	0.0383243	0.106148
ENST00000261205	SYT1	4.15107	4.82823	4.88805	4.82079	237.101	0.136753	0.150527	0.908493	0.363618	0.811051	SYT1	14.0177	11.136	5.79374	6.21164	50.2975	-0.858706	0.32903	-2.60981	0.00905931	0.0321316
ENST00000261211	CDK17	8.05849	8.46306	8.63849	8.35177	364.644	0.0644003	0.119084	0.540799	0.588646	0.921022	CDK17	15.5687	16.4956	12.5738	16.3296	104.695	0.00811543	0.222979	0.0363955	0.970967	0.985686
ENST00000261234	RXYLT1	20.5399	19.7456	19.2018	18.6342	390.336	-0.0664719	0.115081	-0.577608	0.563529	0.910702	TMEM5	27.3347	24.541	9.89631	10.3073	103.152	-1.24764	0.234067	-5.33026	9.81e-08	8.84e-07
ENST00000261245	MNAT1	12.9923	12.4054	13.8011	12.2933	367.602	0.0630642	0.120639	0.522754	0.601146	0.925007	MNAT1	50.9001	52.4347	76.6693	68.6866	254.719	0.63266	0.140873	4.49099	7.09e-06	5.02e-05
ENST00000261249	TRMT5	7.67269	7.62613	7.62269	7.97859	441.846	0.0522842	0.107931	0.484421	0.628087	0.933964	TRMT5	19.5518	21.6345	23.3547	20.4336	143.002	0.198541	0.188737	1.05194	0.292826	0.489915
ENST00000261250	C12orf4	7.77152	7.66414	8.00611	7.29035	316.205	0.0109605	0.128622	0.0852143	0.932091	0.988519	C12orf4	12.3554	13.0877	14.2042	13.3271	95.7229	0.244387	0.228455	1.06974	0.284737	0.480577
ENST00000261263	RAB21	4.74828	4.54323	4.84643	4.77864	793.473	0.0749142	0.0805351	0.930206	0.352265	0.804309	RAB21	118.464	109.73	102.295	83.431	306.15	-0.179143	0.135123	-1.32578	0.184913	0.353915
ENST00000261296	TGDS	5.50249	6.5936	5.72702	6.36946	117.192	0.0241164	0.213334	0.113045	0.909995	0.985435	TGDS	9.94194	9.21839	7.94913	10.3886	43.7538	-0.0323286	0.340573	-0.0949241	0.924375	0.963851
ENST00000261303	PSMC1	28.7598	28.7957	31.6002	32.5789	1441.28	0.181189	0.0592277	3.0592	0.00221929	0.0308797	PSMC1	129.855	130.715	146.391	147.977	801.851	0.316113	0.0815009	3.87865	0.000105039	0.000608384
ENST00000261304	GALC	9.56329	10.2521	9.38325	9.74249	398.209	-0.0270554	0.114654	-0.235975	0.813452	0.9706	GALC	35.7619	33.5852	4.67699	5.67838	175.137	-2.59969	0.210021	-12.3783	3.43e-35	1.23e-33
ENST00000261308	PPWD1	16.0803	16.5445	16.9299	16.0824	373.178	0.0410714	0.117676	0.349022	0.727072	0.961423	PPWD1	16.6981	22.4752	20.8815	19.3725	170.115	0.16693	0.180603	0.92429	0.355335	0.553811
ENST00000261313	PEBP1	154.472	155.55	148.459	156.889	2373.67	0.00212843	0.0470476	0.0452399	0.963916	0.994818	PEBP1	622.993	609.129	585.203	581.056	1463	0.0652164	0.0611433	1.06662	0.286145	0.482142
ENST00000261318	C12orf49	6.84707	7.06013	6.92954	6.97897	631.803	0.0241777	0.0900104	0.26861	0.78823	0.968264	C12orf49	15.6161	16.423	11.9266	10.312	36.4796	-0.378679	0.372416	-1.01682	0.309241	0.508654
ENST00000261326	MOCOS	3.66161	3.6218	3.94103	3.77093	249.954	0.106518	0.143377	0.742917	0.457532	0.867081	MOCOS	6.5048	7.18776	5.69655	7.61788	78.9848	0.10717	0.257411	0.416339	0.677162	0.816949
ENST00000261349	LRP6	16.8666	16.8898	17.4854	16.4703	1871.36	0.0325255	0.0529354	0.614438	0.538926	0.902131	LRP6	17.9916	18.0459	4.91323	5.76654	241.113	-1.6128	0.157877	-10.2155	1.69e-24	4.27e-23
ENST00000261366	LMNB1	39.9828	40.4334	36.083	35.5358	1183.87	-0.143112	0.0654019	-2.18819	0.0286559	0.21509	LMNB1	66.7433	66.19	59.1314	62.048	486.966	-0.000982452	0.103253	-0.009515	0.992408	0.997327
ENST00000261377	REXO5	3.54255	3.30223	4.59103	4.12781	114.316	0.373155	0.212784	1.75368	0.0794845	0.413978	AC004381.6	1.8882	2.35612	3.15886	3.38671	27.1144	0.752924	0.433615	1.73639	0.0824948	0.193365
ENST00000261381	XYLT1	0.163929	0.163922	0.221195	0.210649	20.4409	0.421502	0.495365	0.850892	0.394829	0.836538	XYLT1	0.798258	0.585109	0.26374	0.440868	6.38681	-0.821938	0.946075	-0.868788	0.384963	0.58333
ENST00000261396	NUP133	22.8304	23.7081	22.5839	23.5906	1301.57	0.0127174	0.0632024	0.201218	0.840528	0.976002	NUP133	28.0541	25.1193	25.3802	28.8932	409.649	0.165855	0.116275	1.4264	0.153752	0.31074
ENST00000261402	NUAK1	3.69817	4.069	3.89115	3.49106	278.781	-0.049294	0.138923	-0.35483	0.722717	0.960956	NUAK1	9.58096	10.2928	7.52531	9.2106	80.4685	-0.0723304	0.252725	-0.286202	0.774724	0.879798
ENST00000261407	LPCAT3	9.1408	9.25008	9.25635	10.1015	227.481	0.0979726	0.15106	0.64857	0.516617	0.893497	LPCAT3	30.1524	30.2451	9.86778	13.5432	129.59	-1.17361	0.210407	-5.57781	2.44e-08	2.36e-07
ENST00000261416	HEXB	56.0125	57.2277	55.0575	58.7051	1108.84	0.0306852	0.0687021	0.446642	0.655134	0.942854	HEXB	135.933	121.357	36.0891	34.0667	584.755	-1.76507	0.107658	-16.3951	2.07e-60	1.45e-58
ENST00000261427	UBE2K	10.3556	10.2283	10.475	10.4744	576.978	0.0494292	0.0940143	0.525763	0.599053	0.924527	UBE2K	155.542	165.53	148.384	146.709	405.213	-0.0023237	0.112248	-0.0207015	0.983484	0.993408
ENST00000261435	N4BP2	4.19523	4.24549	3.66256	4.35375	431.119	-0.0503772	0.114382	-0.440429	0.659627	0.944628	N4BP2	2.16251	2.45688	1.04791	1.00324	38.8282	-0.946328	0.37069	-2.55288	0.0106835	0.036982
ENST00000261438	KLF3	9.53921	9.45114	11.564	10.8125	624.225	0.260749	0.0913146	2.8555	0.00429686	0.0516294	KLF3	25.6185	29.8857	21.5049	28.6763	119.439	-0.000412028	0.216161	-0.00190612	0.998479	0.999149
ENST00000261439	TBC1D1	7.25051	7.40781	8.10215	7.49403	465.238	0.113508	0.105994	1.0709	0.284215	0.752931	TBC1D1	3.9921	4.20359	2.38202	2.24427	49.3201	-0.670337	0.325329	-2.06049	0.0393519	0.108557
ENST00000261441	RSBN1	2.49316	2.23387	1.824	1.96663	151.887	-0.294466	0.186816	-1.57623	0.114972	0.504945	RSBN1	4.07842	4.02299	2.52296	3.16303	36.2672	-0.363256	0.374211	-0.970726	0.331685	0.530181
ENST00000261461	PPP2R5A	12.9944	12.5406	11.8445	10.1611	415.605	-0.190582	0.115477	-1.65039	0.0988637	0.465792	PPP2R5A	21.4795	18.6174	20.817	21.9226	131.931	0.256061	0.19616	1.30537	0.191768	0.362954
ENST00000261475	PPP2R3C	12.9755	14.8856	16.96	16.2166	302.804	0.275971	0.133508	2.06707	0.0387272	0.265784	PPP2R3C	18.589	17.0318	21.2168	19.413	115.269	0.349885	0.209378	1.67107	0.0947081	0.215687
ENST00000261483	MAN2A1	11.0488	11.2759	11.0033	10.7326	554.254	-0.0145193	0.0961763	-0.150965	0.880003	0.981012	MAN2A1	16.3034	14.5307	4.71658	5.17403	149.659	-1.52256	0.200066	-7.61027	2.74e-14	4.13e-13
ENST00000261488	ENOX1	1.61684	1.17832	1.40865	1.09164	42.5487	-0.136854	0.352404	-0.388346	0.69776	0.956201	ENOX1	0.43293	0.218165	0.65559	0	2.72622	0.161272	1.59629	0.101029	0.919527	NA
ENST00000261497	USP22	98.6483	99.5574	96.6566	94.3842	5443.93	-0.0290797	0.0302949	-0.959888	0.337112	0.795685	USP22	246.427	243.82	138.267	134.166	1306.36	-0.71634	0.0656084	-10.9184	9.41e-28	2.67e-26
ENST00000261503	SPECC1	36.4919	36.035	39.2609	39.1787	1607.2	0.137102	0.0558137	2.45643	0.0140326	0.128239	SPECC1	19.5487	15.9588	11.7622	11.797	205.389	-0.466956	0.161829	-2.88549	0.00390807	0.0156285
ENST00000261507	MSMO1	15.3383	15.9981	16.8345	18.7195	401.776	0.20622	0.115181	1.7904	0.0733894	0.394053	MSMO1	81.2321	72.5337	49.2042	51.6586	245.116	-0.444795	0.145476	-3.05751	0.00223186	0.00955772
ENST00000261520	ICE2	14.8559	14.3563	14.8647	13.9458	1127.04	0.00405358	0.0684058	0.0592579	0.952747	0.993183	ICE2	17.2212	15.8565	15.883	14.6384	204.379	0.0293665	0.156318	0.187864	0.850983	0.924729
ENST00000261530	GPATCH2L	4.55774	4.67993	5.07062	5.25005	739.575	0.183979	0.0832774	2.20923	0.0271583	0.207697	GPATCH2L	24.8342	21.6823	21.8644	19.2976	139.412	-0.0567211	0.192043	-0.295357	0.767721	0.87502
ENST00000261534	POMT2	7.64228	7.07215	7.4303	7.42985	388.753	0.0382455	0.11597	0.329789	0.74156	0.961733	POMT2	9.46472	10.6613	3.70959	4.28429	68.0268	-1.27392	0.291441	-4.37111	1.24e-05	8.44e-05
ENST00000261537	MIB1	12.2032	11.5712	11.778	11.8211	1222.87	0.0133566	0.0651565	0.204992	0.837579	0.97552	MIB1	12.4521	13.4563	8.2968	8.06919	138.207	-0.593742	0.192361	-3.0866	0.00202461	0.00879174
ENST00000261556	TMEM260	4.25958	3.83729	4.09309	4.01887	186.096	0.0267099	0.167577	0.159389	0.873362	0.980217	TMEM260	6.79202	6.3493	2.98122	3.10964	44.2821	-0.923776	0.346748	-2.66411	0.00771915	0.0281024
ENST00000261560	ZNF430	3.38567	2.94393	3.0537	2.81032	127.694	-0.0862114	0.203292	-0.424077	0.67151	0.948479	ZNF430	2.0756	1.35358	2.21866	1.03844	12.1351	0.129588	0.670259	0.19334	0.846693	0.922007
ENST00000261574	IPO5	57.6702	55.8975	59.5685	60.8773	3786.55	0.108868	0.0368941	2.95082	0.0031693	0.0407135	IPO5	80.766	76.745	88.4677	90.2462	1232.83	0.319112	0.0668347	4.77464	1.8e-06	1.38e-05
ENST00000261584	PALB2	12.1314	12.4978	12.7338	12.7069	541.045	0.0708079	0.0972755	0.727911	0.466668	0.870289	PALB2	4.98773	5.02689	5.75803	4.84821	81.4045	0.160333	0.249692	0.642124	0.520793	0.699188
ENST00000261588	KIAA0556	4.73732	5.2799	4.62928	4.85094	348.07	-0.0554353	0.124052	-0.446872	0.654967	0.942854	KIAA0556	3.05386	3.46798	4.22066	2.76984	70.8508	0.261836	0.277701	0.942873	0.345746	0.543654
ENST00000261590	DSG2	19.006	19.3064	19.6868	19.3907	1188.6	0.0525669	0.0651569	0.806774	0.419796	0.849237	DSG2	62.9952	59.2864	26.3937	26.5474	626.944	-1.07137	0.0963393	-11.1208	9.94e-29	2.9e-27
ENST00000261593	RNF138	8.44573	8.83656	9.70005	9.69946	351.301	0.19077	0.120995	1.57667	0.11487	0.504733	RNF138	17.6114	17.1771	16.5177	17.9471	56.5512	0.145939	0.2973	0.490884	0.623509	0.779245
ENST00000261596	LPIN2	6.13973	6.4543	6.49073	6.57462	430.924	0.0770506	0.109442	0.704028	0.481415	0.877155	LPIN2	12.2721	12.7598	5.55159	6.32301	107.952	-0.859448	0.222208	-3.86777	0.000109837	0.000633791
ENST00000261597	NDC80	10.532	10.2624	9.9285	9.63154	231.215	-0.0642522	0.149239	-0.430533	0.666808	0.946628	NDC80	11.2737	11.69	19.0417	15.4102	122.513	0.757557	0.210128	3.60522	0.000311894	0.00164708
ENST00000261600	THOC1	15.0412	14.963	16.8383	16.1398	358.039	0.160376	0.119784	1.33888	0.18061	0.629267	THOC1	14.3	12.9177	19.2486	14.8009	134.397	0.47382	0.196927	2.40607	0.0161252	0.0518761
ENST00000261601	USP14	5.8347	6.39324	6.20965	5.87135	325.794	0.00660417	0.127429	0.0518264	0.958667	0.993183	USP14	90.1617	89.4497	85.6743	83.0179	568.078	0.0468964	0.095801	0.489518	0.624475	0.780216
ENST00000261609	HERC2	19.9069	20.1242	18.9214	19.31	3239.27	-0.0423182	0.0393234	-1.07616	0.281856	0.751152	HERC2	6.88161	7.06622	7.37747	7.60921	460.09	0.240356	0.105542	2.27735	0.022765	0.0692623
ENST00000261622	SLC7A5	235.381	231.712	197.076	200.268	10609.5	-0.209285	0.0217312	-9.63061	5.94e-22	7.25e-20	SLC7A5	447.073	456.255	291.173	283.196	2438.46	-0.526499	0.0482502	-10.9119	1.01e-27	2.87e-26
ENST00000261637	UTP20	21.1558	20.2772	21.0588	21.5459	2046.13	0.0642631	0.0503947	1.2752	0.20224	0.658085	UTP20	7.67153	8.58804	8.65794	8.1674	305.988	0.171294	0.129139	1.32643	0.184698	0.353668
ENST00000261643	COX10	12.5765	12.9707	12.1394	11.8126	386.588	-0.0689765	0.115469	-0.597358	0.550268	0.904856	COX10	14.6099	17.5746	13.7026	12.7887	85.6915	-0.225362	0.244581	-0.92142	0.356831	0.555445
ENST00000261647	TTC19	21.3808	21.8354	22.4835	23.9282	737.129	0.126961	0.0839985	1.51147	0.130669	0.537338	TTC19	39.3753	39.3153	23.2959	27.3702	158.905	-0.480859	0.179815	-2.6742	0.00749088	0.0274488
ENST00000261658	BFAR	30.3173	28.5707	30.8569	30.7465	943.1	0.0890682	0.0742912	1.19891	0.230564	0.695812	BFAR	49.4887	49.7214	31.1006	28.9378	230.585	-0.606468	0.148705	-4.07832	4.54e-05	0.000279039
ENST00000261667	KPNA3	13.4714	13.5095	13.3818	14.0525	619.357	0.0480859	0.0911755	0.5274	0.597916	0.924482	KPNA3	63.8497	56.6773	56.9611	56.6428	404.477	0.0850538	0.114151	0.745097	0.456213	0.648216
ENST00000261681	MPP5	14.4517	15.2431	14.8649	14.3071	867.634	-0.00158301	0.0776154	-0.0203956	0.983728	0.997793	MPP5	14.5373	16.8336	12.3653	13.6546	126.446	-0.134552	0.201968	-0.666204	0.505281	0.688206
ENST00000261692	CDK2AP1	76.8618	76.1299	83.2473	82.9302	1158.48	0.143309	0.0658792	2.17534	0.0296049	0.220126	CDK2AP1	386.698	358.018	263.191	244.116	469.436	-0.406731	0.106867	-3.80596	0.000141254	0.000797993
ENST00000261700	RTRAF	21.3306	20.3734	21.6264	21.3853	1600.39	0.0685782	0.0568081	1.20719	0.227359	0.691288	C14orf166	371.356	360.473	377.663	370.116	1194.44	0.170093	0.0676642	2.51379	0.0119443	0.0406033
ENST00000261708	UTP6	19.9107	20.174	20.1784	19.6679	932.959	0.0154305	0.0738142	0.209046	0.834413	0.975453	UTP6	45.5797	43.1178	51.4044	52.8313	383.159	0.38736	0.11508	3.36602	0.000762611	0.00368844
ENST00000261712	PSMD11	54.9532	57.8798	58.7811	58.5047	2388.65	0.0798838	0.0469146	1.70275	0.088615	0.440325	PSMD11	364.789	371.476	356.415	369.693	2029.94	0.1243	0.0524951	2.36785	0.017892	0.0567205
ENST00000261714	BLMH	25.9644	26.53	23.1697	23.9421	619.169	-0.132029	0.0912021	-1.44765	0.147714	0.571534	BLMH	56.2867	52.5664	53.5501	49.8058	319.627	0.0820941	0.126396	0.649499	0.516016	0.695638
ENST00000261716	TAOK1	24.5413	25.1198	23.7843	24.3415	3270.1	-0.021265	0.0394305	-0.539303	0.589678	0.921712	TAOK1	26.6277	28.7987	14.4867	14.9519	279.739	-0.780045	0.13758	-5.66977	1.43e-08	1.42e-07
ENST00000261721	BTBD1	43.4946	43.5439	43.3671	40.2083	1468.74	-0.0345413	0.0602534	-0.573267	0.566464	0.912455	BTBD1	57.4652	59.3715	42.6792	37.0162	308.765	-0.409095	0.130977	-3.12342	0.00178764	0.0078731
ENST00000261733	ALDH2	13.7095	13.256	12.785	12.9599	1358.28	-0.0427905	0.0613109	-0.697926	0.485223	0.879293	ALDH2	103.381	108.398	89.3642	105.003	692.355	-0.000668487	0.0936914	-0.00713498	0.994307	0.997606
ENST00000261735	ERP29	64.0457	67.1645	62.8925	62.0475	1120.45	-0.0466016	0.067894	-0.686388	0.492468	0.883036	ERP29	206.914	220.363	99.491	87.7982	517.018	-1.04976	0.107433	-9.7713	1.5e-22	3.5e-21
ENST00000261739	ANKRD13A	7.74603	7.97691	7.40379	8.29471	359.222	0.0218042	0.12166	0.179223	0.857763	0.979578	ANKRD13A	12.0314	13.1958	10.8601	10.319	89.6517	-0.101126	0.236761	-0.42712	0.669292	0.812584
ENST00000261745	NAA25	18.7482	18.6765	18.9795	18.3051	1162.22	0.0186225	0.0661545	0.281501	0.778326	0.968264	NAA25	14.6777	16.8855	15.1791	16.9639	202.392	0.165791	0.162002	1.02338	0.306126	0.505211
ENST00000261758	MESD	23.2509	24.106	23.6534	22.4768	1058.33	-0.0138244	0.0701592	-0.197043	0.843794	0.976002	MESDC2	163.277	181.644	52.603	59.6245	347.565	-1.49864	0.133963	-11.1869	4.72e-29	1.4e-27
ENST00000261772	AARS1	65.3844	68.0842	68.983	68.707	2541.88	0.0689671	0.044998	1.53267	0.125357	0.527245	AARS	126.03	113.76	138.396	133.826	1644.94	0.317659	0.0626272	5.07222	3.93e-07	3.31e-06
ENST00000261776	VAC14	14.5964	15.8363	12.1432	12.9904	463.379	-0.251951	0.107829	-2.33658	0.0194612	0.163137	VAC14	24.7404	23.0511	24.4733	25.7352	253.668	0.237853	0.139609	1.70371	0.0884347	0.204559
ENST00000261778	TANGO6	11.1898	10.7384	11.5252	11.267	589.96	0.0797912	0.0934448	0.853886	0.393168	0.835398	TANGO6	9.60569	9.55287	8.93952	9.12056	134.998	0.048476	0.191344	0.253345	0.800001	0.894442
ENST00000261783	ARG2	0.513147	0.726927	0.824293	0.329697	12.3286	-0.0797717	0.674021	-0.118352	0.905789	0.98488	ARG2	1.37614	1.58508	2.61977	2.14979	8.98885	0.839746	0.769207	1.0917	0.274964	0.468251
ENST00000261797	NDST1	15.9541	16.5858	15.0489	14.5761	1341.94	-0.111348	0.0621035	-1.79295	0.0729814	0.392979	NDST1	6.47015	7.15713	9.27207	9.58712	94.1203	0.588446	0.23265	2.52931	0.0114286	0.0391669
ENST00000261811	CYSTM1	52.7551	48.305	55.9636	57.0236	456.05	0.184974	0.107557	1.71978	0.0854725	0.43114	CYSTM1	454.152	490.256	494.554	521.298	634.61	0.241151	0.0928341	2.59766	0.00938623	0.0331299
ENST00000261813	PFDN1	49.1169	49.7875	47.7912	47.0809	697.755	-0.0360116	0.0854899	-0.421239	0.673581	0.949295	PFDN1	211.633	194.897	215.61	221.793	336.664	0.254089	0.123737	2.05346	0.0400276	0.110127
ENST00000261819	ANAPC5	64.4797	65.8102	69.4388	68.537	1861.86	0.106729	0.0519705	2.05365	0.0400096	0.271751	ANAPC5	87.4759	84.4466	65.4371	67.4227	752.538	-0.241079	0.0853245	-2.82544	0.00472161	0.0183807
ENST00000261837	GNB5	5.46871	5.89054	5.1175	5.63598	530.758	-0.0550091	0.101309	-0.542985	0.58714	0.920016	GNB5	55.851	58.2427	41.8343	36.1782	248.596	-0.397953	0.146549	-2.71549	0.00661769	0.0246724
ENST00000261839	MYO5C	10.8693	11.5013	11.0479	11.4235	843.394	0.0305322	0.0787159	0.387878	0.698106	0.956291	MYO5C	12.6243	12.4013	8.6632	8.15489	237.016	-0.459981	0.145631	-3.15854	0.00158559	0.00708144
ENST00000261842	AP4E1	9.91338	9.30702	9.12631	9.37493	685.564	-0.0309847	0.0874537	-0.354298	0.723116	0.961142	AP4E1	8.01825	8.94484	6.74768	7.88319	118.338	-0.0583912	0.208365	-0.280235	0.779297	0.882761
ENST00000261845	MAPK6	32.2735	31.9042	35.5435	34.379	1927.45	0.147718	0.0513125	2.8788	0.00399191	0.0485807	MAPK6	24.1309	24.8068	11.6933	11.8452	169.298	-0.930745	0.176334	-5.27832	1.3e-07	1.16e-06
ENST00000261854	SPPL2A	23.6838	23.739	23.4586	23.7316	1854.16	0.0169473	0.0519298	0.32635	0.744159	0.962241	SPPL2A	126.071	121.936	25.1305	22.7657	490.263	-2.24015	0.120607	-18.574	5.22e-77	4.94e-75
ENST00000261858	GLCE	9.6397	9.62308	9.66037	9.53487	522.91	0.0189702	0.0988292	0.191949	0.847782	0.977932	GLCE	21.6563	20.4622	6.83217	6.98943	111.02	-1.47221	0.228802	-6.43445	1.24e-10	1.45e-09
ENST00000261866	SPG11	7.33912	7.71731	7.49913	7.4041	627.654	0.00928894	0.0907575	0.102349	0.91848	0.986063	SPG11	6.43804	6.00051	6.79855	6.88789	210.121	0.219737	0.153413	1.43232	0.152052	0.308101
ENST00000261867	SLC30A4	1.42519	1.39065	1.31453	1.15199	101.188	-0.167062	0.225996	-0.739224	0.459771	0.867914	SLC30A4	1.46	2.28895	1.37567	2.16816	10.1368	0.0711141	0.725751	0.0979869	0.921943	0.9624
ENST00000261868	EIF3J	22.6795	24.7552	23.7226	23.1705	630.323	0.00748129	0.0920081	0.0813111	0.935195	0.989454	EIF3J	73.9094	82.1017	97.3801	103.24	309.947	0.535707	0.129185	4.14683	3.37e-05	0.000212647
ENST00000261879	APH1B	5.11483	5.17384	4.97412	5.32909	229.7	0.0260821	0.150002	0.173878	0.861961	0.979578	APH1B	57.9495	62.2253	17.7147	23.0315	132.936	-1.42607	0.212524	-6.71015	1.94e-11	2.43e-10
ENST00000261880	AAGAB	43.5729	46.0235	46.908	44.86	1531.39	0.0585923	0.0589947	0.99318	0.320622	0.781674	AAGAB	137.199	127.81	133.556	127.509	548.352	0.128081	0.0982287	1.30391	0.192264	0.363437
ENST00000261881	TIPIN	22.2267	23.3607	23.4582	21.6337	422.377	0.00827057	0.111724	0.0740265	0.940989	0.990719	TIPIN	57.1083	58.9548	54.3386	54.4994	223.599	0.0693429	0.148152	0.468053	0.639746	0.790369
ENST00000261884	TRIP4	6.86064	7.1039	7.2514	7.09446	153.641	0.062908	0.182703	0.344318	0.730607	0.961608	TRIP4	26.3521	30.1807	28.5867	26.3426	215.282	0.0984152	0.153953	0.639257	0.522656	0.701081
ENST00000261888	PARP16	3.86002	4.09922	3.42231	4.03731	113.482	-0.0694726	0.214908	-0.323267	0.746493	0.963236	PARP16	10.1266	10.8576	6.78648	5.23582	34.8834	-0.755719	0.387987	-1.94779	0.0514395	0.134505
ENST00000261889	SNX1	14.7302	14.3419	12.7649	13.2	500.196	-0.139036	0.101632	-1.36804	0.1713	0.61407	SNX1	69.9684	71.9028	78.4058	78.486	551.313	0.303287	0.0969029	3.1298	0.00174925	0.00772327
ENST00000261890	RAB11A	41.1348	39.9979	40.2253	40.845	2140.34	0.0229261	0.0487139	0.470627	0.637907	0.936851	RAB11A	523.24	530.595	557.376	577.424	1567.37	0.239932	0.0588004	4.08044	4.5e-05	0.000276645
ENST00000261892	SLC24A1	1.9288	2.12726	1.49449	1.51262	109.573	-0.407653	0.218468	-1.86596	0.0620465	0.357434	SLC24A1	0.633244	0.765859	0.690428	0.61553	9.62704	0.0530077	0.733104	0.0723059	0.942358	0.972296
ENST00000261893	LACTB	23.2627	21.8506	20.2776	20.661	443.118	-0.116058	0.108565	-1.06902	0.28506	0.752936	LACTB	30.5346	31.5437	29.747	32.3084	225.43	0.163774	0.148043	1.10625	0.268616	0.460735
ENST00000261900	CCNT1	18.3711	19.0083	17.6675	17.8211	1333.08	-0.0508416	0.0618421	-0.822118	0.411009	0.845565	CCNT1	12.8451	14.9748	7.66445	8.38596	104.043	-0.640141	0.226552	-2.82558	0.00471944	0.0183807
ENST00000261918	SEMA7A	0.62935	0.580913	0.466595	0.902028	23.4823	0.201475	0.479136	0.420496	0.674123	0.949295	SEMA7A	1.35843	0.737206	2.65839	2.53929	16.114	1.46138	0.59097	2.47284	0.0134044	0.0445697
ENST00000261937	FLT4	0.868603	0.840547	0.612122	0.594082	45.7752	-0.478773	0.332948	-1.43798	0.150439	0.576212	FLT4	1.17436	0.926279	0.556699	0.496308	13.9183	-0.879373	0.625601	-1.40565	0.159829	0.319135
ENST00000261942	FAF2	30.8108	29.2972	32.8274	32.6849	1519.32	0.148241	0.0583782	2.53932	0.0111068	0.108498	FAF2	63.4943	65.569	37.5127	34.2034	290.429	-0.704635	0.134351	-5.24474	1.57e-07	1.38e-06
ENST00000261965	TUBGCP3	5.49848	4.88732	5.14381	5.33299	218.162	0.0366118	0.155607	0.235283	0.813989	0.970864	TUBGCP3	14.8088	13.6877	18.033	17.8067	194.577	0.462544	0.159369	2.90234	0.00370389	0.0149276
ENST00000261973	RBM25	19.815	19.4903	19.7915	19.3895	1441.44	0.0194663	0.0591956	0.328846	0.742272	0.961898	RBM25	24.0234	22.4647	25.9027	24.1739	268.114	0.274528	0.136192	2.01574	0.043827	0.118612
ENST00000261978	LTBP2	5.34166	5.65052	5.12661	4.84082	477.799	-0.117142	0.1049	-1.1167	0.264123	0.732415	LTBP2	1.14652	1.23255	0.648174	0.928703	22.9107	-0.417995	0.475165	-0.879684	0.379031	0.577023
ENST00000262013	SPAG9	27.6872	27.3404	27.6622	27.1784	2451.08	0.0191235	0.0452299	0.422807	0.672436	0.949032	SPAG9	34.507	35.6806	28.337	29.573	556.272	-0.145099	0.0971564	-1.49346	0.135318	0.282994
ENST00000262027	MARS1	74.3854	78.6475	79.8218	83.8716	2388.74	0.121204	0.0481688	2.51623	0.0118619	0.1138	MARS	109.339	115.809	103.325	104.101	1274.08	0.022158	0.0662544	0.334437	0.738049	0.857658
ENST00000262030	ATP5F1B	676.049	662.966	671.045	673.989	12727.3	0.0305055	0.0197185	1.54705	0.121852	0.519971	ATP5B	1041.01	1053.69	1269.73	1287.4	8168.63	0.420809	0.0257996	16.3107	8.29e-60	5.67e-58
ENST00000262031	RBMS2	10.7829	11.1001	11.5803	11.2704	1023.74	0.0864701	0.0706124	1.22457	0.220736	0.681942	RBMS2	46.3387	41.7048	32.315	32.4106	203.797	-0.289777	0.157841	-1.83587	0.0663763	0.163779
ENST00000262039	PIK3C3	3.61941	3.70604	3.04504	3.50214	351.924	-0.137992	0.123999	-1.11284	0.265776	0.73421	PIK3C3	12.4751	12.6521	13.2119	12.679	149.895	0.190046	0.181385	1.04775	0.294756	0.49234
ENST00000262043	PHF3	17.38	17.7365	17.3345	17.9202	1561.82	0.029709	0.0571257	0.520063	0.603019	0.92543	PHF3	8.15736	8.2558	6.11953	6.22058	191.182	-0.2661	0.161002	-1.65278	0.0983758	0.221838
ENST00000262053	ATF1	14.9411	14.7033	13.3663	14.0185	370.684	-0.0903421	0.118069	-0.765165	0.444173	0.859888	ATF1	58.0374	57.199	47.5988	58.0364	197.239	0.0512615	0.163617	0.313301	0.754052	0.866478
ENST00000262067	TSPAN13	17.8446	17.4948	16.8203	16.6511	347.351	-0.0543132	0.121584	-0.446714	0.655082	0.942854	TSPAN13	70.2758	73.2343	31.8225	29.0151	135.33	-1.06179	0.199738	-5.31595	1.06e-07	9.51e-07
ENST00000262094	RAB27B	28.1692	29.3232	28.7318	28.5351	2166.38	0.0183719	0.0487066	0.377196	0.706028	0.958262	RAB27B	76.936	76.8965	54.5301	54.3036	188.441	-0.35258	0.162706	-2.16697	0.0302369	0.0874631
ENST00000262096	ZDHHC2	10.6494	9.91782	9.59032	10.2101	644.546	-0.0307775	0.0911555	-0.337637	0.735637	0.961608	ZDHHC2	21.8072	20.6406	6.66201	6.91213	65.1225	-1.49942	0.300355	-4.99216	5.97e-07	4.89e-06
ENST00000262102	MTUS1	74.7541	73.6365	74.056	74.0003	4922.61	0.0207826	0.0316602	0.656425	0.511551	0.892184	MTUS1	60.2779	59.9779	28.0809	29.0295	728.066	-0.929965	0.0883932	-10.5208	6.93e-26	1.84e-24
ENST00000262109	ERICH1	5.99937	6.95351	5.43181	4.96425	113.064	-0.293186	0.216607	-1.35354	0.175883	0.621743	ERICH1	14.6099	19.6328	17.5089	17.5607	100.625	0.174674	0.230202	0.758787	0.44798	0.641103
ENST00000262113	MYOM2	0.505847	0.375289	0.419389	0.440331	23.4998	-0.0114944	0.465309	-0.0247027	0.980292	0.997415	MYOM2	0.617554	0.81391	0.978329	0.808067	15.8125	0.378922	0.566423	0.668973	0.503512	0.687586
ENST00000262120	TWSG1	15.1016	14.7087	15.1502	14.3652	599.69	0.0096816	0.0929535	0.104155	0.917046	0.986019	TWSG1	116.405	106.311	39.319	39.8145	218.839	-1.35777	0.160653	-8.45153	2.88e-17	5.16e-16
ENST00000262126	ANKRD12	3.1213	2.98357	2.86641	2.64289	353.132	-0.124065	0.122047	-1.01653	0.309378	0.772972	ANKRD12	1.85628	1.49668	1.59459	1.27125	42.5183	-0.0287986	0.34644	-0.0831274	0.93375	0.969028
ENST00000262127	CEP76	4.88336	4.77024	5.33236	4.49777	152.063	0.0501664	0.186638	0.26879	0.788091	0.968264	CEP76	9.92685	10.5369	10.7465	7.57048	76.7839	-0.0688895	0.274715	-0.250767	0.801994	0.895452
ENST00000262133	RBL2	14.4447	14.5283	13.976	14.3429	749.589	-0.00889894	0.0824782	-0.107894	0.914079	0.986019	RBL2	11.6091	13.8556	8.95644	9.72533	164.346	-0.314367	0.17876	-1.7586	0.0786461	0.186504
ENST00000262134	LPCAT2	5.53712	5.42922	4.88212	4.98064	298.188	-0.128983	0.131414	-0.981502	0.326345	0.786854	LPCAT2	21.3642	21.403	17.2027	15.8547	134.017	-0.241181	0.193481	-1.24653	0.212568	0.390903
ENST00000262138	CACNG4	1.89301	2.1666	2.13957	1.9929	79.1297	0.0497145	0.254211	0.195564	0.844952	0.976002	CACNG4	2.12824	1.71596	3.09391	3.87883	12.0098	0.733602	0.659756	1.11193	0.266168	0.45844
ENST00000262139	WIPI1	3.68334	3.76883	3.68763	4.01762	77.9715	0.0722274	0.254537	0.28376	0.776594	0.968264	WIPI1	14.3556	15.0974	10.9639	13.0819	78.5887	-0.174786	0.254694	-0.686259	0.49255	0.6796
ENST00000262144	WDR59	4.39318	4.71273	4.41284	4.752	289.513	0.0333584	0.134662	0.247719	0.804352	0.968838	WDR59	14.4332	13.4663	10.4737	10.5047	155.833	-0.280684	0.179686	-1.56208	0.118268	0.255622
ENST00000262146	MTFR1	20.0058	21.7928	22.8173	24.1627	634.743	0.192643	0.0920856	2.092	0.0364388	0.254659	MTFR1	47.0227	50.7619	38.9897	37.8354	190.854	-0.200072	0.162069	-1.23449	0.217021	0.396384
ENST00000262150	CDH19	0.285503	0.324421	0.266832	0.216787	18.5445	-0.310717	0.525797	-0.590945	0.554557	0.90693	CDH19	0.540883	0.817693	0.109208	0	3.72582	-3.57568	1.79885	-1.98775	0.0468389	0.125089
ENST00000262158	SMAD7	9.20904	8.91337	8.20577	7.99184	409.472	-0.137962	0.112346	-1.22801	0.219442	0.679711	SMAD7	4.08413	4.44549	2.3749	4.16837	20.4017	-0.275205	0.502785	-0.547362	0.58413	0.752265
ENST00000262160	SMAD2	10.2945	9.97781	10.254	10.308	3811.76	0.0445041	0.0365571	1.21739	0.223457	0.684588	SMAD2	58.7149	69.5391	53.6183	50.8799	353.581	-0.179305	0.125153	-1.43268	0.151949	0.30795
ENST00000262187	RHEB	45.4126	45.6902	43.5252	43.5739	982.67	-0.0407979	0.0717222	-0.568832	0.56947	0.91379	RHEB	257.194	273.317	235.973	218.749	594.863	-0.0964049	0.0952298	-1.01234	0.311376	0.51108
ENST00000262188	SMARCD3	6.56046	6.39617	6.90264	5.74306	137.535	-0.0110212	0.196354	-0.056129	0.955239	0.993183	SMARCD3	6.05161	5.37304	5.41113	4.02659	33.0363	-0.115537	0.391615	-0.295028	0.767973	0.875211
ENST00000262189	KMT2C	7.07647	7.1004	7.84186	7.82893	1357.13	0.168577	0.0607436	2.77522	0.00551641	0.0627944	KMT2C	1.78554	1.19971	1.5279	1.61851	97.422	0.24102	0.240777	1.00101	0.316823	0.516939
ENST00000262193	PSMB1	157.201	152.15	162.531	150.5	1494.95	0.0410956	0.0602628	0.68194	0.495277	0.883666	PSMB1	566.855	564.612	660.128	639.276	1959.99	0.341681	0.0528727	6.46234	1.03e-10	1.22e-09
ENST00000262198	ADNP2	14.2774	13.9757	13.0327	13.5613	762.279	-0.063272	0.082172	-0.769994	0.441303	0.857936	ADNP2	12.3681	11.721	4.99443	5.30826	126.502	-1.04798	0.206254	-5.08105	3.75e-07	3.18e-06
ENST00000262207	CRISPLD1	0.494458	0.228201	0.366587	0.317689	16.2942	-0.0548083	0.582989	-0.0940125	0.925099	0.986936	CRISPLD1	1.67025	1.68336	0.674471	0.169117	6.80899	-1.89736	1.00446	-1.88894	0.0589005	0.148861
ENST00000262209	TRPA1	2.17245	2.28255	2.04325	1.92175	117.766	-0.144063	0.209113	-0.688924	0.490871	0.882907	TRPA1	1.74139	1.81775	0.602745	1.05792	18.8051	-0.973114	0.54243	-1.79399	0.0728146	0.175745
ENST00000262210	CSPP1	6.06294	6.13752	6.30041	6.42026	293.425	0.0842794	0.132119	0.637903	0.523537	0.896879	CSPP1	2.39388	1.60845	2.34767	2.28536	34.2713	0.320361	0.390193	0.821032	0.411628	0.607971
ENST00000262213	TRAM1	163.732	166.532	164.704	166.997	5453.39	0.0303055	0.0301861	1.00396	0.3154	0.779364	TRAM1	408.816	406.774	126.013	124.125	1283.49	-1.5569	0.0700891	-22.2131	2.56e-109	4.24e-107
ENST00000262215	ARFGEF1	12.7267	12.8154	13.3564	12.997	1024.16	0.0691454	0.0703539	0.982823	0.325695	0.786208	ARFGEF1	10.5388	10.0525	9.62098	8.55188	236.253	-0.0470187	0.146646	-0.320627	0.748493	0.863818
ENST00000262219	ANXA13	0.668982	0.617495	0.793564	0.595136	11.4554	0.134317	0.672494	0.19973	0.841692	0.976002	ANXA13	14.4256	15.7176	12.5165	20.3698	74.6178	0.261084	0.27278	0.957122	0.338506	0.537178
ENST00000262225	TMED2	132.632	134.104	134.323	134.356	3671.91	0.0345121	0.0366703	0.941145	0.34663	0.800145	TMED2	622.533	629.165	248.313	250.31	1147.56	-1.15366	0.0717774	-16.0728	3.96e-58	2.65e-56
ENST00000262238	YY1	16.6964	16.4081	15.156	14.7854	1110.01	-0.120853	0.0677318	-1.78429	0.0743771	0.398142	YY1	84.3864	75.5613	53.5586	47.5896	348.805	-0.549625	0.124764	-4.40532	1.06e-05	7.29e-05
ENST00000262241	RCOR1	9.79033	9.12209	10.4266	9.78692	606.738	0.120013	0.0937317	1.28039	0.200409	0.655574	RCOR1	26.4025	27.0436	22.2506	19.3525	149.818	-0.242463	0.183134	-1.32397	0.185514	0.354626
ENST00000262244	MOB3B	1.57466	1.66277	1.65123	1.69969	115.227	0.0737523	0.210606	0.350191	0.726195	0.961423	MOB3B	9.02139	8.76749	3.12255	6.26359	19.0269	-0.711847	0.539434	-1.31962	0.186962	0.35668
ENST00000262259	ZNF175	2.02052	2.05784	2.61255	2.64444	165.056	0.390289	0.1763	2.21378	0.0268437	0.20593	ZNF175	3.23008	3.55139	2.84587	1.665	25.7733	-0.435971	0.453745	-0.960828	0.336639	0.535381
ENST00000262265	PIH1D1	47.3108	46.1482	46.6733	46.6704	602.764	0.0222533	0.0920983	0.241626	0.80907	0.969577	PIH1D1	56.8747	60.4654	65.7028	57.4414	229.373	0.205404	0.148675	1.38156	0.167107	0.32893
ENST00000262288	SCPEP1	19.0152	17.951	21.5934	19.6242	405.053	0.181077	0.11465	1.57939	0.114246	0.503659	SCPEP1	61.1253	60.5189	16.7872	18.7076	228.119	-1.66138	0.162172	-10.2445	1.25e-24	3.17e-23
ENST00000262291	VMP1	173.17	169.083	180.998	181.301	7002.34	0.10615	0.0267323	3.97087	7.16e-05	0.00160514	VMP1	213.066	198.327	85.3472	93.3058	768.02	-1.06563	0.0901786	-11.8169	3.19e-32	1.06e-30
ENST00000262293	PRR11	30.5569	30.6607	32.9635	32.241	794.944	0.115063	0.0799363	1.43943	0.150029	0.576104	PRR11	79.646	78.7126	55.5034	62.949	324.568	-0.250364	0.127038	-1.97078	0.0487488	0.129132
ENST00000262294	TRIM37	18.6957	17.7301	18.9022	19.3689	904.097	0.0953264	0.0757961	1.25767	0.208512	0.665425	TRIM37	17.4706	16.9529	10.9322	10.7014	174.75	-0.509941	0.170103	-2.99783	0.00271906	0.0113729
ENST00000262301	LMF1	2.83724	3.27359	2.36394	2.64424	78.495	-0.263019	0.257234	-1.02249	0.306549	0.771408	LMF1	10.0647	10.3911	2.97386	3.13179	48.6261	-1.59195	0.348957	-4.56203	5.07e-06	3.69e-05
ENST00000262302	NUBP2	34.9531	32.468	17.5155	20.7059	383.288	-0.794783	0.123249	-6.44861	1.13e-10	6.6e-09	NUBP2	45.9677	45.5521	43.5544	45.2434	162.675	0.112122	0.174141	0.643858	0.519668	0.698434
ENST00000262304	PKD1	8.94052	9.14239	4.22585	3.96567	998.362	-1.11839	0.0751506	-14.8819	4.32e-50	1.27e-47	PKD1	1.73054	1.92343	5.23135	5.44334	203.275	1.72315	0.165793	10.3934	2.66e-25	6.87e-24
ENST00000262305	RAB11FIP3	4.45955	4.45936	4.35284	3.80577	220.935	-0.104516	0.154752	-0.675379	0.499435	0.88546	RAB11FIP3	2.57754	2.505	2.11888	1.90145	22.4067	-0.212329	0.473958	-0.447992	0.654159	0.801223
ENST00000262306	ELOB	157.961	156.129	140.02	134.238	922.536	-0.171616	0.0746871	-2.2978	0.021573	0.176127	TCEB2	989.006	949.285	1083.45	1070.37	2191.12	0.298669	0.0505437	5.90914	3.44e-09	3.6e-08
ENST00000262316	RHBDF1	4.36999	4.42442	3.96614	3.9659	134.849	-0.124855	0.195071	-0.640051	0.52214	0.896759	RHBDF1	6.18609	5.1682	2.76099	1.68128	43.672	-1.24284	0.368633	-3.37148	0.000747665	0.00362679
ENST00000262318	CLCN7	11.5642	11.2559	8.1085	8.98378	399.442	-0.392918	0.115829	-3.39221	0.000693303	0.01155	CLCN7	21.0866	22.1863	7.11152	7.22641	168.065	-1.49007	0.185522	-8.03175	9.61e-16	1.59e-14
ENST00000262319	TELO2	7.6935	8.01371	4.97506	4.49946	224.497	-0.705265	0.155396	-4.53851	5.67e-06	0.000163562	TELO2	8.0652	7.70952	7.45384	10.4056	93.4499	0.340214	0.239071	1.42307	0.154716	0.312128
ENST00000262320	AXIN1	8.70755	8.44265	6.51563	6.37359	299.828	-0.388028	0.131957	-2.94057	0.00327613	0.0416035	AXIN1	6.13586	4.80076	5.47715	5.78764	63.2961	0.164546	0.285345	0.576656	0.564172	0.735585
ENST00000262352	SLC1A1	0.486158	0.751302	0.823535	0.653109	27.0749	0.279014	0.440064	0.63403	0.526061	0.898149	SLC1A1	3.18749	4.81877	0.965369	1.1296	16.4298	-1.75773	0.621478	-2.8283	0.00467954	0.0182598
ENST00000262366	GLIS2	2.70628	2.13933	1.90338	2.46719	110.983	-0.124832	0.226907	-0.550148	0.582218	0.918313	GLIS2	6.64061	8.03129	5.79222	4.67976	43.2385	-0.269301	0.345967	-0.7784	0.436333	0.630039
ENST00000262367	CREBBP	4.24119	4.17285	3.63027	4.13611	470.479	-0.0915135	0.107531	-0.85104	0.394747	0.836538	CREBBP	8.97705	8.44436	5.3513	5.67878	226.084	-0.535947	0.150322	-3.56533	0.000363402	0.00190287
ENST00000262370	MGRN1	6.61236	7.42298	5.15722	4.91643	255.06	-0.454426	0.145859	-3.11553	0.00183616	0.0263518	MGRN1	30.8096	30.1991	20.0526	20.112	191.345	-0.480727	0.162116	-2.96533	0.0030236	0.012524
ENST00000262374	ALG1	16.8267	17.5159	16.8457	17.8298	396.678	0.037966	0.114436	0.331766	0.740066	0.961733	ALG1	37.1966	38.0932	16.7164	16.2192	163.675	-1.0599	0.181451	-5.84124	5.18e-09	5.32e-08
ENST00000262375	DNAJA3	41.4042	42.3708	40.8002	41.5756	1209.22	-0.000256173	0.0647623	-0.00395558	0.996844	0.999941	DNAJA3	55.0949	54.9429	44.4378	45.4501	315.972	-0.162634	0.125591	-1.29494	0.19534	0.367568
ENST00000262384	N4BP1	4.54955	4.54935	4.67425	4.48108	348.253	0.032954	0.121503	0.27122	0.786222	0.968264	N4BP1	10.874	8.84577	11.6678	13.5897	133.05	0.496718	0.200175	2.48142	0.013086	0.0438049
ENST00000262394	WSB1	8.50003	9.3	8.7221	7.67251	470.404	-0.0946166	0.109251	-0.866051	0.386462	0.829753	WSB1	52.4018	50.1475	36.0466	36.9566	245.015	-0.353715	0.143105	-2.47173	0.0134462	0.044673
ENST00000262395	TRAF4	18.6931	21.4029	24.3849	25.7623	704.668	0.34677	0.0903859	3.83655	0.000124774	0.00262943	TRAF4	20.5819	21.4897	22.0638	22.4889	134.745	0.227396	0.191415	1.18797	0.234844	0.418872
ENST00000262407	ITGA2B	0.375826	0.399298	0.301854	0.301835	12.9175	-0.336577	0.633204	-0.531545	0.595041	0.923742	ITGA2B	0.334906	0.742578	0.0811443	0.325538	5.46134	-0.768267	1.05174	-0.730475	0.4651	0.656337
ENST00000262415	DHX8	27.3476	26.7279	28.4632	28.4236	1660.17	0.0971569	0.0550692	1.76427	0.0776867	0.407298	DHX8	24.0725	26.6187	21.0081	22.7337	379.124	-0.0934541	0.118873	-0.786166	0.43177	0.625638
ENST00000262428	COTL1	136.42	129.493	124.627	123.992	2554.19	-0.0729868	0.0456218	-1.59982	0.109638	0.492393	COTL1	759.648	766.105	613.912	602.628	1272.39	-0.198015	0.0654317	-3.02628	0.00247582	0.0104757
ENST00000262430	MLYCD	1.48363	1.58998	1.50435	1.60079	217.437	0.0387715	0.154737	0.250565	0.802151	0.968509	MLYCD	9.59911	10.1013	8.89263	9.09046	60.2792	-0.0141494	0.288112	-0.0491108	0.960831	0.981484
ENST00000262432	METTL2B	23.2947	23.406	22.5238	22.9074	541.859	-0.0157202	0.0971267	-0.161852	0.871422	0.980217	METTL2B	11.5989	15.03	12.0441	8.72428	57.6831	-0.232055	0.309523	-0.749717	0.453425	0.645778
ENST00000262435	SMURF2	10.4244	10.7382	11.6795	11.0562	738.638	0.127483	0.0838064	1.52116	0.128219	0.533293	SMURF2	10.8856	9.6583	8.56615	8.5915	92.7279	-0.121769	0.233123	-0.52234	0.601434	0.763595
ENST00000262441	GLP2R	4.9078	4.40124	4.90537	4.60476	212.886	0.0548514	0.157467	0.348335	0.727589	0.961425	GLP2R	11.8296	13.9519	6.40321	6.42216	70.0543	-0.893668	0.276782	-3.22877	0.00124322	0.00569612
ENST00000262455	ERP44	9.22905	8.51483	9.12983	8.29934	455.842	-0.00179614	0.109076	-0.0164669	0.986862	0.997979	ERP44	80.7354	81.8875	43.8157	40.613	326.278	-0.804367	0.127495	-6.309	2.81e-10	3.2e-09
ENST00000262457	INVS	7.77638	7.4423	7.41988	7.93407	403.601	0.0368036	0.113771	0.323488	0.746326	0.963236	INVS	5.88114	6.25661	7.20386	4.60506	81.8204	0.0830533	0.264202	0.314355	0.753251	0.866268
ENST00000262460	GINS1	39.6623	38.7968	38.885	40.849	1412.04	0.0472919	0.0605449	0.781104	0.434742	0.855335	GINS1	122.144	129.544	101.515	110.012	298.702	-0.127458	0.130482	-0.976828	0.328655	0.527528
ENST00000262461	SLC12A2	48.3013	47.7286	44.9758	43.3996	3415.89	-0.0958033	0.0387285	-2.47372	0.0133715	0.123643	SLC12A2	76.0821	74.7696	18.9208	19.3954	741.888	-1.84229	0.0943327	-19.5298	6.13e-85	6.39e-83
ENST00000262482	RNF167	38.3963	39.3153	43.9584	44.0148	793.187	0.202974	0.0800458	2.53572	0.0112215	0.109445	RNF167	49.5108	46.6931	34.4462	32.3738	185.974	-0.409528	0.164133	-2.49511	0.012592	0.0425306
ENST00000262483	PITPNM3	2.1147	1.76026	1.93901	1.86545	147.985	-0.00248052	0.190559	-0.0130171	0.989614	0.998282	PITPNM3	0.428708	0.360061	1.29839	1.47587	11.591	1.96595	0.721154	2.72612	0.00640836	0.0239931
ENST00000262498	CFAP20	33.1723	26.2815	27.053	30.1664	402.839	-0.0312603	0.187819	-0.166439	0.867812	0.979578	CFAP20	109.258	107.935	108.335	92.4447	263.873	0.0342852	0.13873	0.247137	0.804802	0.896081
ENST00000262506	CSNK2A2	11.5627	11.0426	10.6851	11.4079	227.351	-0.00903337	0.151083	-0.0597908	0.952322	0.993183	CSNK2A2	78.3425	76.7531	60.9433	56.5333	314.41	-0.276963	0.126714	-2.18573	0.0288354	0.084295
ENST00000262507	COQ9	45.221	45.3193	46.5802	47.8014	812.686	0.0839853	0.0791034	1.06172	0.288364	0.756682	COQ9	67.4051	67.2725	69.4621	65.9449	282.455	0.16064	0.132433	1.213	0.225132	0.407652
ENST00000262510	NLRC5	1.30568	1.17386	1.37003	1.06209	90.3183	-0.00385224	0.243059	-0.015849	0.987355	0.997979	NLRC5	0.67132	0.789356	1.94281	1.54072	30.8675	1.4247	0.420001	3.39214	0.000693481	0.00337983
ENST00000262518	SRCAP	4.11939	4.27952	4.20095	4.12904	528.687	0.0121552	0.0986526	0.123212	0.901939	0.984803	SRCAP	6.48534	6.64483	9.997	8.66527	339.541	0.628277	0.125265	5.01558	5.29e-07	4.37e-06
ENST00000262519	SETD1A	3.20546	3.1644	2.71696	2.62916	189.074	-0.228736	0.165406	-1.38287	0.166703	0.604624	SETD1A	4.03618	3.65697	3.11158	3.51708	80.3853	-0.0903839	0.251021	-0.360066	0.718798	0.845938
ENST00000262525	ZNF629	10.5994	10.5989	11.325	10.9272	712.641	0.0940345	0.0846858	1.11039	0.266829	0.734626	ZNF629	5.84618	4.92351	4.85092	3.40569	53.5631	-0.214755	0.316292	-0.678978	0.497152	0.68284
ENST00000262547	DZANK1	1.44842	1.58852	1.71122	1.531	59.2251	0.118408	0.291528	0.406165	0.684622	0.951769	DZANK1	1.85089	2.05197	0.896904	1.68667	14.8683	-0.539911	0.604708	-0.892847	0.371939	0.569164
ENST00000262554	SPTLC1	34.4728	34.5594	31.7724	34.7513	1016.8	-0.0293565	0.0726468	-0.404099	0.68614	0.952239	SPTLC1	78.7157	80.8166	49.3733	52.201	393.29	-0.482012	0.115865	-4.16013	3.18e-05	0.000201972
ENST00000262577	ZC3H3	4.39832	3.77339	2.98666	2.85803	123.384	-0.459496	0.208658	-2.20215	0.0276549	0.210061	ZC3H3	10.3509	10.3582	8.53761	8.0277	116.003	-0.159934	0.207476	-0.770854	0.440793	0.634327
ENST00000262584	RPL8	953.228	955.306	807.334	810.512	9889	-0.214352	0.0220464	-9.72279	2.41e-22	2.97e-20	RPL8	1837.59	1809.99	2470.22	2545.97	7416.98	0.595107	0.0276237	21.5433	6.11e-103	9.13e-101
ENST00000262613	SLC9A3R1	14.802	14.3914	11.7503	12.0657	284.555	-0.269676	0.135024	-1.99725	0.0457976	0.297224	SLC9A3R1	38.2959	34.4822	35.0895	38.7363	172.595	0.171423	0.171243	1.00105	0.316802	0.516939
ENST00000262633	RBM42	70.8519	74.4709	56.9762	53.1869	1163.96	-0.375579	0.0683701	-5.49333	3.94e-08	1.73e-06	RBM42	126.138	127.567	140.866	126.485	834.852	0.216406	0.0829668	2.60834	0.00909817	0.032251
ENST00000262640	VAMP7	25.8645	25.4378	26.1275	26.2521	697.681	0.0540196	0.0854161	0.632428	0.527107	0.898543	VAMP7	75.4822	82.0097	79.7692	81.9566	273.305	0.196063	0.135458	1.44741	0.147782	0.301225
ENST00000262643	CCNE1	20.3251	17.7733	19.3477	20.7437	411.949	0.0975894	0.116105	0.840525	0.400614	0.839691	CCNE1	29.0256	27.5427	14.8055	19.1803	120.83	-0.62198	0.21104	-2.94722	0.00320649	0.0131584
ENST00000262644	IMPAD1	28.088	27.4081	27.2422	26.7754	2132.4	-0.0149198	0.0487509	-0.306041	0.759573	0.965811	IMPAD1	98.8655	99.4463	26.5374	23.5539	287.664	-1.84685	0.147305	-12.5376	4.65e-36	1.73e-34
ENST00000262646	RAB2A	33.5845	31.5703	30.4501	32.7537	1292.21	-0.0198263	0.0654695	-0.302833	0.762017	0.96617	RAB2A	361.755	340.443	257.301	275.214	850.976	-0.259637	0.082856	-3.1336	0.00172677	0.00762945
ENST00000262662	CDKN2C	8.66714	8.32909	6.65384	7.01503	239.84	-0.290285	0.147541	-1.96749	0.0491265	0.312342	CDKN2C	6.21371	5.84499	7.52758	10.0665	16.324	0.696722	0.561791	1.24018	0.214909	0.393742
ENST00000262710	ACIN1	26.246	26.6257	27.4507	26.0234	1414.81	0.0403789	0.0604799	0.667641	0.504363	0.886735	ACIN1	24.4434	24.0076	25.651	30.267	449.26	0.376929	0.113849	3.31077	0.000930386	0.00438439
ENST00000262713	AJUBA	31.6248	31.1921	26.3293	27.663	1311.61	-0.194361	0.0628244	-3.09372	0.00197666	0.0280928	AJUBA	20.1795	20.9898	27.894	28.4481	175.992	0.55383	0.167557	3.30532	0.000948674	0.00446039
ENST00000262715	TEP1	3.63279	3.75397	3.74253	3.88848	436.267	0.070978	0.108712	0.652902	0.51382	0.892487	TEP1	3.31146	4.03164	1.95769	2.54287	101.121	-0.554595	0.235876	-2.35121	0.0187123	0.058959
ENST00000262719	PHLPP1	2.23141	2.54265	2.6508	2.08383	161.451	0.0120742	0.186876	0.0646106	0.948484	0.992769	PHLPP1	2.55352	3.26802	3.38807	3.59509	72.75	0.365132	0.265224	1.3767	0.168606	0.331197
ENST00000262738	CELSR1	9.54306	10.0449	7.59788	8.27971	1087.89	-0.278923	0.0712396	-3.91528	9.03e-05	0.0019622	CELSR1	4.08695	4.00267	3.77628	3.5069	151.787	-0.0460124	0.181225	-0.253897	0.799575	0.89428
ENST00000262746	PRDX1	668.584	679.944	696.894	688.001	9093.7	0.0624308	0.0232918	2.68037	0.00735403	0.0786301	PRDX1	4267.94	4247.16	5105.56	5030.16	12324.3	0.395967	0.0206497	19.1754	5.94e-82	5.93e-80
ENST00000262764	PGS1	12.2738	11.2416	11.0181	11.7489	286.545	-0.0226332	0.135753	-0.166724	0.867587	0.979578	PGS1	11.3903	14.5074	13.1922	11.4063	92.4755	0.0297998	0.237509	0.125468	0.900153	0.950291
ENST00000262768	TIMP2	27.5901	27.298	30.2507	29.2425	1126.43	0.140265	0.0671644	2.08838	0.036764	0.256786	TIMP2	285.966	289.168	55.5673	48.8133	479.157	-2.32156	0.123217	-18.8413	3.46e-79	3.38e-77
ENST00000262776	LGALS3BP	89.7347	91.8089	81.2649	82.786	2050.56	-0.122131	0.0497477	-2.455	0.0140884	0.128546	LGALS3BP	105.045	108.027	54.9089	58.685	619.186	-0.78053	0.0952892	-8.19117	2.59e-16	4.4e-15
ENST00000262809	ELL	2.30542	1.68782	1.8781	1.63993	80.3441	-0.158802	0.261817	-0.606539	0.544157	0.903751	ELL	3.02581	2.37188	3.12255	2.99563	23.28	0.332423	0.467335	0.711316	0.476888	0.666329
ENST00000262811	MAST3	0.873182	0.762268	0.765882	0.641165	48.3269	-0.193008	0.324631	-0.594548	0.552146	0.905521	MAST3	1.06331	1.76823	0.837293	0.904368	19.3924	-0.575496	0.523458	-1.09941	0.271589	0.463778
ENST00000262815	MAU2	4.36845	5.24529	4.76848	4.33472	244.396	-0.0546687	0.151725	-0.360315	0.718612	0.960728	MAU2	14.3047	10.87	8.52717	10.0698	88.0325	-0.296505	0.248473	-1.19331	0.232749	0.415913
ENST00000262843	MID2	2.89823	4.11985	3.65142	4.16237	115.038	0.179039	0.225415	0.794263	0.427042	0.851735	MID2	5.113	4.58056	4.47354	2.99118	42.4339	-0.298958	0.353059	-0.846765	0.397126	0.594921
ENST00000262844	AMMECR1	10.3409	9.42397	9.83411	9.59797	565.26	-0.000470648	0.0973149	-0.00483634	0.996141	0.999761	AMMECR1	15.8832	14.9548	12.659	15.4897	65.1688	0.051581	0.278368	0.185298	0.852995	0.925061
ENST00000262848	PRKX	6.33447	6.65559	6.97002	6.43612	434.249	0.069523	0.110141	0.631218	0.527898	0.898656	PRKX	8.94219	9.60015	5.652	7.0859	47.6879	-0.445724	0.329117	-1.3543	0.17564	0.341709
ENST00000262850	RRAGB	7.27312	7.4806	6.80961	7.81055	124.551	0.0109311	0.204361	0.0534892	0.957342	0.993183	RRAGB	8.37356	7.87667	7.66445	9.04368	40.6765	0.265727	0.349536	0.760228	0.447118	0.640375
ENST00000262879	RALGAPB	13.1291	12.5985	12.2617	12.6745	1178.9	-0.0210448	0.0662804	-0.317512	0.750855	0.964192	RALGAPB	12.7635	12.6759	11.5685	11.0933	236.851	-0.0398758	0.144117	-0.276691	0.782017	0.883721
ENST00000262887	XRCC1	15.6613	16.273	17.2401	16.3397	494.952	0.0965238	0.102411	0.942518	0.345927	0.800145	XRCC1	25.8365	28.477	25.306	22.442	214.164	-0.0260882	0.156312	-0.166898	0.86745	0.933858
ENST00000262891	MARK4	1.28504	1.25325	1.18246	0.958144	64.9226	-0.221814	0.28141	-0.788224	0.430565	0.852829	MARK4	4.16451	4.38374	4.03607	2.13645	35.8265	-0.333256	0.392342	-0.849402	0.395658	0.593715
ENST00000262894	AC021092.2	2.94018	2.9033	3.09354	3.30587	146.821	0.155148	0.187083	0.829303	0.406933	0.842603	ZNF225	1.87291	1.68892	2.26894	0.958169	16.3031	0.0727374	0.58575	0.124178	0.901174	0.950992
ENST00000262903	HACE1	1.87551	2.0719	2.08882	2.08869	100.226	0.105787	0.22588	0.468333	0.639546	0.937606	HACE1	3.52179	4.08956	1.76223	2.32559	34.8261	-0.649593	0.39109	-1.66098	0.0967172	0.219055
ENST00000262919	ATRN	14.7832	14.4142	14.3969	14.9301	1364.85	0.030426	0.0612797	0.49651	0.619535	0.931986	ATRN	23.279	25.8668	8.79078	7.98837	302.581	-1.42314	0.139772	-10.1819	2.39e-24	5.93e-23
ENST00000262932	CNPY4	7.40887	7.35326	8.02888	7.7442	121.693	0.119598	0.204768	0.584067	0.559175	0.908236	CNPY4	16.8371	18.9491	6.79911	6.81923	40.1772	-1.26191	0.372523	-3.38746	0.000705429	0.00343266
ENST00000262942	ARPC1A	46.6448	51.1365	45.8693	51.9732	834.257	0.0249634	0.0844832	0.295484	0.767624	0.967067	ARPC1A	7.33554	8.53053	12.7603	10.2841	427.429	0.994761	0.111504	8.92127	4.61e-19	9.11e-18
ENST00000262948	MAP2K2	45.7135	47.785	32.7642	32.0355	738.818	-0.504914	0.084577	-5.96988	2.37e-09	1.21e-07	MAP2K2	72.0293	67.8603	63.6532	66.3784	624.276	-0.0330562	0.0920055	-0.359285	0.719382	0.846229
ENST00000262960	DPP9	15.1641	14.6688	14.059	14.1071	671.354	-0.0589083	0.0874297	-0.673779	0.500452	0.885612	DPP9	29.3354	31.3742	29.5837	26.2586	343.122	0.0098595	0.123061	0.0801191	0.936143	0.969965
ENST00000262962	YJU2	12.5062	14.8469	11.8885	11.0806	193.976	-0.227959	0.168273	-1.3547	0.175512	0.621578	CCDC94	26.9325	22.8009	26.6239	27.2262	110.512	0.217	0.214028	1.01388	0.310638	0.510207
ENST00000262971	PIAS4	6.60353	6.12398	4.9616	5.02973	187.768	-0.325172	0.167141	-1.9455	0.0517152	0.322807	PIAS4	15.9656	15.5408	20.4986	15.7511	116.493	0.387579	0.212618	1.82289	0.0683204	0.167409
ENST00000262982	CSE1L	138.139	136.476	143.915	144.291	5387.12	0.0937235	0.0301638	3.10716	0.00188897	0.0269528	CSE1L	143.487	139.557	149.863	150.045	1869.38	0.224546	0.0539939	4.15873	3.2e-05	0.000202906
ENST00000262990	ZNF330	15.8597	16.464	17.3266	16.3815	336.659	0.084542	0.124011	0.681728	0.495411	0.883666	ZNF330	29.5773	30.2478	25.8196	28.2742	119.908	-0.0400705	0.204291	-0.196145	0.844497	0.920672
ENST00000262995	GAB1	0.788415	0.706471	0.618431	0.710495	60.7236	-0.145742	0.289578	-0.503291	0.61476	0.929143	GAB1	2.88371	1.93757	2.56187	2.10228	22.6257	0.203214	0.479899	0.423451	0.671966	0.814101
ENST00000263012	NOMO3	25.4705	26.0335	25.2132	26.8764	1092.23	0.0403561	0.0692074	0.583118	0.559814	0.908516	NOMO3	0.714062	0.719667	0.199627	0.266956	7.60357	-1.46784	0.894528	-1.64091	0.100815	0.226002
ENST00000263025	MAPK3	12.4842	11.6148	11.6357	11.1061	225.588	-0.0596008	0.151979	-0.392164	0.694937	0.956201	MAPK3	54.5364	53.484	49.6066	60.4626	275.446	0.135987	0.138667	0.980671	0.326755	0.525736
ENST00000263026	EEF2K	7.02529	7.12439	7.26786	7.53711	577.545	0.0893534	0.0942292	0.948255	0.342999	0.799693	EEF2K	11.039	11.6094	8.37275	8.63079	94.304	-0.256657	0.231062	-1.11077	0.266667	0.45898
ENST00000263035	DHTKD1	11.7847	12.0843	11.1856	11.0631	642.915	-0.0773717	0.0892569	-0.866842	0.386028	0.829231	DHTKD1	13.1766	14.5775	14.0362	15.918	173.717	0.238531	0.171022	1.39474	0.163095	0.323189
ENST00000263038	PHYH	23.0679	21.423	21.3982	20.2385	357.683	-0.0716305	0.121365	-0.590209	0.55505	0.907144	PHYH	60.9458	52.2937	52.8802	53.537	245.978	0.0642187	0.144841	0.443373	0.657496	0.803416
ENST00000263056	MAP3K8	10.0356	9.94918	12.6755	11.8641	342.36	0.32024	0.123009	2.6034	0.00923043	0.0948273	MAP3K8	17.8827	20.7266	19.6781	21.3659	122.909	0.243283	0.204199	1.1914	0.233496	0.417008
ENST00000263062	EPC1	7.71461	8.58388	7.78689	7.38989	247.086	-0.0788237	0.146434	-0.538287	0.590379	0.92199	EPC1	11.4879	10.5713	6.45427	7.58598	97.9358	-0.511558	0.229971	-2.22444	0.0261187	0.0776167
ENST00000263063	MTPAP	11.6866	13.2034	13.6495	12.2426	766.854	0.08099	0.0885176	0.914959	0.360213	0.808752	MTPAP	33.4814	31.575	32.4488	30.6561	246.647	0.0966803	0.141771	0.681945	0.495274	0.681772
ENST00000263073	SMG6	9.02818	9.50653	8.43776	8.22631	566.591	-0.129446	0.0958386	-1.35067	0.176801	0.623269	SMG6	7.94514	8.1558	5.64436	6.91246	134.182	-0.218871	0.197673	-1.10723	0.268193	0.460269
ENST00000263083	DPH1	24.0999	23.9884	24.9653	23.1671	576.088	0.0253555	0.0952159	0.266294	0.790012	0.968264	DPH1	41.0021	38.1574	43.3915	40.275	238.119	0.210655	0.145673	1.44608	0.148154	0.301789
ENST00000263087	ITGAE	6.74722	7.52046	7.4557	7.62092	300.897	0.103615	0.132541	0.781757	0.434357	0.855335	ITGAE	3.18749	3.68844	5.86373	6.23968	76.1677	0.876894	0.261036	3.35928	0.000781461	0.00376567
ENST00000263088	PLD2	8.82933	8.04573	8.11326	7.80778	304.318	-0.0599338	0.131675	-0.455164	0.648991	0.941096	PLD2	12.0838	11.8779	12.199	10.6038	145.201	0.0599011	0.185257	0.32334	0.746438	0.863053
ENST00000263092	METTL16	15.034	15.617	14.9289	14.6902	932.442	-0.0253596	0.0741656	-0.341931	0.732403	0.961608	METTL16	33.3108	30.8266	21.9023	22.569	200.55	-0.398553	0.15845	-2.51533	0.0118923	0.0404762
ENST00000263093	SLC27A5	7.16643	7.16612	8.65961	7.33044	187.433	0.181905	0.168693	1.07832	0.280891	0.750631	SLC27A5	5.14387	4.06608	5.13185	5.39213	46.2766	0.316134	0.330212	0.957369	0.338381	0.53706
ENST00000263094	ABCA7	1.72671	1.91848	0.970791	1.37135	109.795	-0.614088	0.22881	-2.68384	0.0072783	0.0779556	ABCA7	1.03774	1.37273	1.13931	1.02447	32.4803	-0.0160543	0.397521	-0.0403861	0.967785	0.984042
ENST00000263095	ZNF264	2.82183	2.68734	2.97872	3.30661	386.93	0.214194	0.117372	1.82491	0.0680145	0.376994	ZNF264	6.88166	5.70516	2.68928	3.77613	38.4648	-0.8777	0.378826	-2.31689	0.0205095	0.0635867
ENST00000263100	A1BG	0.434931	0.434912	0.27946	0.496788	15.0003	-0.140164	0.593178	-0.236292	0.813206	0.970494	A1BG	1.54652	2.40884	1.02193	1.70825	10.9236	-0.295069	0.706395	-0.417711	0.676159	0.816651
ENST00000263102	CCDC6	16.866	16.7796	17.7867	17.6389	1066.57	0.0984114	0.0687183	1.4321	0.152116	0.578683	CCDC6	59.4628	59.0418	45.5339	44.5983	322.247	-0.273191	0.124824	-2.18861	0.0286253	0.0838587
ENST00000263116	RAB36	3.60775	3.67163	3.59377	3.64841	149.847	0.0166503	0.184901	0.0900499	0.928248	0.987145	RAB36	8.1506	10.5315	5.56996	6.34823	33.827	-0.529264	0.393443	-1.34521	0.178557	0.345477
ENST00000263125	PRKCQ	2.91225	3.31379	3.12948	2.64538	105.267	-0.0844884	0.224219	-0.376812	0.706313	0.958262	PRKCQ	7.19593	6.15959	3.22428	1.43725	40.4393	-1.37704	0.390702	-3.52452	0.000424248	0.0021773
ENST00000263168	CAPZA1	82.9317	82.9627	79.3179	82.7866	2084.71	-0.00930028	0.0495999	-0.187506	0.851264	0.977985	CAPZA1	248.931	242.301	266.782	268.458	971.032	0.266992	0.0744187	3.5877	0.00033361	0.00175578
ENST00000263174	PALMD	2.20578	2.24069	1.97972	2.29453	54.8598	-0.0329396	0.302766	-0.108796	0.913365	0.985986	PALMD	0.63152	0.381887	0.459032	0.613854	3.73599	0.233493	1.23508	0.18905	0.850053	0.924042
ENST00000263181	KIF18A	26.7374	25.0383	28.4281	29.0103	1006.43	0.173772	0.0722646	2.40467	0.0161872	0.14254	KIF18A	20.6921	20.6202	15.1155	15.8194	211.37	-0.288064	0.153639	-1.87494	0.0608004	0.152419
ENST00000263202	UFD1	26.0533	29.2459	28.2033	28.4948	540.774	0.0600964	0.100346	0.598891	0.549245	0.904548	UFD1L	120.599	120.86	181.25	172.422	604.809	0.676048	0.0937884	7.20823	5.67e-13	7.93e-12
ENST00000263205	MED15	5.09675	5.21845	4.88879	4.70047	179.747	-0.0812433	0.169296	-0.479889	0.631306	0.934092	MED15	22.3441	20.3833	20.4353	21.8908	219.216	0.12093	0.151089	0.80039	0.423485	0.618079
ENST00000263207	ARVCF	0.483543	0.483522	0.466043	0.258897	18.4776	-0.391751	0.536598	-0.730065	0.465351	0.869883	ARVCF	0.868111	0.583284	2.80446	2.02167	20.1482	1.88462	0.545099	3.45739	0.000545443	0.0027226
ENST00000263208	HIRA	6.23022	5.50413	6.16668	6.32176	264.721	0.113879	0.141719	0.80355	0.421657	0.849802	HIRA	7.66419	8.13816	12.2691	11.3077	133.232	0.673776	0.19494	3.45632	0.000547602	0.00273227
ENST00000263212	PPM1F	9.68119	9.85533	8.11729	8.03522	494.977	-0.250375	0.102094	-2.4524	0.0141908	0.12892	PPM1F	13.1829	16.3763	17.456	21.2327	103.334	0.552306	0.228472	2.41739	0.0156324	0.050659
ENST00000263228	UBE2R2	18.4173	19.5481	19.7973	22.4231	968.162	0.17731	0.0777134	2.28158	0.022514	0.182228	UBE2R2	108.776	124.955	85.7259	90.243	319.706	-0.283494	0.128403	-2.20784	0.0272551	0.0804344
ENST00000263233	SYP	1.86468	1.73375	1.89178	1.72352	48.5772	0.0307717	0.320571	0.0959904	0.923528	0.986459	SYP	5.33625	4.48178	3.23229	3.78217	16.9464	-0.33351	0.550426	-0.605913	0.544573	0.719726
ENST00000263238	ACTR3	39.5509	38.247	39.797	39.5874	2792.1	0.0531561	0.0427513	1.24338	0.213729	0.671983	ACTR3	303.681	308.246	270.676	266.824	1585.63	-0.0443698	0.0584402	-0.759235	0.447712	0.640941
ENST00000263239	DDX18	33.7936	33.5091	36.2082	35.3106	1404.81	0.111693	0.0599217	1.86398	0.0623242	0.358699	DDX18	74.4755	74.5367	86.6998	90.6163	722.151	0.372969	0.0862106	4.32626	1.52e-05	0.000102397
ENST00000263245	ARFGAP3	10.4844	9.46554	10.7787	10.6625	304.478	0.128021	0.131505	0.973506	0.330302	0.790059	ARFGAP3	26.5696	27.7297	26.4691	28.35	187.978	0.142594	0.162351	0.878306	0.379778	0.577734
ENST00000263246	PACSIN2	24.684	22.0437	23.9683	24.1607	831.407	0.0666504	0.0819294	0.81351	0.415926	0.84683	PACSIN2	59.9994	59.7488	56.206	55.3283	374.24	0.0538059	0.115903	0.464234	0.64248	0.792403
ENST00000263253	EP300	8.80578	8.71231	8.68445	8.52843	821.867	-0.00132123	0.0786483	-0.0167992	0.986597	0.997979	EP300	9.08118	8.86192	6.8453	5.56951	236.658	-0.406175	0.149972	-2.70833	0.00676218	0.0251581
ENST00000263256	DESI1	11.9551	10.8737	12.3629	11.6676	477.589	0.098027	0.106082	0.924072	0.355449	0.805708	DESI1	38.525	34.6524	46.671	46.8091	93.2297	0.511239	0.232328	2.2005	0.0277713	0.0816852
ENST00000263269	GRIN2D	1.3799	1.17126	0.927876	0.948437	60.7092	-0.419231	0.291768	-1.43686	0.150758	0.576797	GRIN2D	5.62583	5.09249	2.58733	2.21523	68.5959	-0.980858	0.280558	-3.49609	0.000472128	0.00240213
ENST00000263274	LIG1	30.7001	31.3525	27.6903	30.2424	1010.48	-0.0750641	0.0729484	-1.029	0.303478	0.767442	LIG1	23.7784	22.4387	23.4854	27.5114	296.463	0.281749	0.1327	2.1232	0.0337372	0.0955361
ENST00000263277	EHD2	18.4834	18.2962	13.5387	12.5495	593.329	-0.471476	0.0946844	-4.97945	6.38e-07	2.23e-05	EHD2	121.116	123.229	99.2144	99.8194	797.17	-0.159148	0.0820251	-1.94024	0.0523509	0.136341
ENST00000263278	HSD17B14	2.17917	2.02342	2.20031	2.5002	25.2121	0.185578	0.444865	0.417155	0.676565	0.949534	HSD17B14	21.6513	23.38	24.6682	23.4884	84.4473	0.228824	0.244321	0.936573	0.348978	0.546585
ENST00000263346	TCF25	32.2077	31.661	28.0289	30.5029	741.471	-0.101845	0.0845839	-1.20408	0.228561	0.693164	TCF25	32.4289	31.1272	30.6805	33.1479	282.754	0.128259	0.133075	0.963807	0.335143	0.533939
ENST00000263354	NAPA	42.7278	41.2509	39.8703	39.3624	731.052	-0.0598951	0.083822	-0.714551	0.474886	0.872108	NAPA	185.426	182.839	206.914	178.576	734.214	0.22214	0.0898261	2.473	0.0133986	0.0445624
ENST00000263370	ITPKC	5.76098	6.19641	4.63484	4.85229	194.971	-0.309808	0.164115	-1.88775	0.0590593	0.347664	ITPKC	4.48333	4.62122	3.95005	3.71413	37.4256	-0.128679	0.365373	-0.352186	0.724699	0.848851
ENST00000263372	KCNK6	0.99988	0.814152	1.04629	0.624067	53.7181	-0.0950638	0.324142	-0.293278	0.76931	0.967067	KCNK6	4.00218	5.15405	2.42422	1.35077	13.0603	-1.16077	0.664889	-1.74581	0.0808443	0.190378
ENST00000263377	BRD4	2.34817	2.25688	2.27051	2.27038	176.74	0.00378835	0.170538	0.022214	0.982277	0.997763	BRD4	19.7233	18.2302	13.8039	14.4656	295.166	-0.264462	0.130755	-2.02258	0.0431164	0.11704
ENST00000263379	IL27RA	3.49036	3.46251	3.13265	2.63411	101.071	-0.245821	0.227377	-1.08112	0.279644	0.749446	IL27RA	4.92407	6.28612	3.04891	2.52612	34.9592	-0.863494	0.39454	-2.18861	0.0286252	0.0838587
ENST00000263382	ASF1B	21.7723	23.1744	24.9325	25.1175	432.715	0.1792	0.109439	1.63744	0.101539	0.471832	ASF1B	58.5688	63.5426	55.5103	61.1165	156.582	0.0589677	0.180602	0.326506	0.744041	0.861452
ENST00000263383	ILVBL	14.1102	14.3932	12.1189	11.1159	321.205	-0.270818	0.127947	-2.11664	0.0342902	0.245773	ILVBL	22.684	25.0817	11.339	12.9781	147.367	-0.866357	0.191011	-4.53563	5.74e-06	4.14e-05
ENST00000263384	FAM32A	48.3721	54.1789	53.979	51.8942	822.085	0.0700448	0.0826717	0.847265	0.396848	0.836641	FAM32A	134.216	139.654	145.282	134.387	209.266	0.232333	0.153452	1.51405	0.130013	0.275288
ENST00000263388	NOTCH3	1.36512	1.43096	1.11306	1.14929	118.256	-0.281535	0.209024	-1.34691	0.178011	0.62542	NOTCH3	7.40612	7.13185	0.726488	0.801502	116.704	-3.11028	0.28144	-11.0513	2.16e-28	6.23e-27
ENST00000263390	MED26	2.18843	1.85365	1.8859	1.62111	64.5536	-0.18085	0.283013	-0.639016	0.522812	0.896791	MED26	3.13171	2.338	1.68618	2.53675	19.2462	-0.204902	0.520758	-0.393468	0.693974	0.829524
ENST00000263401	COMMD9	11.9987	11.7765	12.6773	13.3531	396.086	0.154775	0.114132	1.35611	0.175065	0.621066	COMMD9	102.984	104.501	123.057	133.671	306.578	0.418043	0.128121	3.26286	0.00110293	0.00510239
ENST00000263433	PPP1R12C	19.5231	17.5863	12.8597	12.7538	505.969	-0.510859	0.104577	-4.88502	1.03e-06	3.45e-05	PPP1R12C	5.78463	6.00943	5.82184	7.89356	65.7768	0.381293	0.282083	1.3517	0.17647	0.342839
ENST00000263440	ALG6	5.80019	5.25926	5.17968	6.82161	206.772	0.141954	0.168775	0.841087	0.400299	0.839267	ALG6	13.1775	13.4193	6.81788	4.16955	60.9823	-1.10917	0.309914	-3.57895	0.000344975	0.00180944
ENST00000263461	WDR11	22.5109	22.3301	23.6601	23.7049	1129.96	0.103043	0.0667186	1.54444	0.122483	0.521149	WDR11	25.5859	25.4429	23.1436	19.0671	376.568	-0.13274	0.121964	-1.08836	0.276438	0.469922
ENST00000263468	CEP126	1.27541	1.00869	1.3708	1.34091	94.9857	0.27159	0.236119	1.15023	0.250051	0.718227	CEP126	1.43299	1.19307	1.13217	0.378507	15.5693	-0.542223	0.616259	-0.879862	0.378934	0.576947
ENST00000263549	PARP12	5.62645	6.05898	7.09137	7.26474	212.255	0.321003	0.156202	2.05505	0.0398744	0.271008	PARP12	8.63715	7.60433	10.9445	8.5644	81.8445	0.389717	0.255132	1.52751	0.126634	0.269441
ENST00000263563	PALD1	3.50983	3.20834	2.46022	3.39398	156.152	-0.174547	0.19349	-0.902101	0.367003	0.815045	PALD1	2.03252	2.21236	0.984917	1.58053	19.6712	-0.788895	0.521897	-1.51159	0.130638	0.276237
ENST00000263578	FOXRED1	19.016	18.387	18.8392	20.668	404.589	0.103	0.114165	0.902207	0.366947	0.815045	FOXRED1	22.4819	22.947	28.103	26.2723	159.923	0.384206	0.175972	2.18333	0.0290112	0.0847203
ENST00000263579	DCPS	4.99919	4.8484	5.49553	5.4565	304.424	0.177388	0.129771	1.36693	0.171647	0.614777	DCPS	36.1391	33.509	39.0273	33.3717	156.916	0.200576	0.181279	1.10645	0.268533	0.460656
ENST00000263593	SIAE	4.13024	4.22017	3.87943	3.9178	236.774	-0.074845	0.14735	-0.507941	0.611495	0.929143	SIAE	17.6978	18.2391	4.99728	4.36535	75.8645	-1.7904	0.285798	-6.26456	3.74e-10	4.21e-09
ENST00000263620	ARID3A	1.37389	1.26392	0.988708	0.970993	73.6263	-0.404679	0.264092	-1.53234	0.125439	0.527245	ARID3A	2.69924	2.3656	0.995215	2.13891	16.0119	-0.606581	0.586132	-1.03489	0.300722	0.498894
ENST00000263629	MTIF2	31.0957	32.5121	30.8916	33.4984	875.073	0.0416839	0.0783269	0.532178	0.594602	0.923742	MTIF2	23.7403	22.6725	23.0777	19.5403	213.279	0.032326	0.156384	0.206709	0.836237	0.915773
ENST00000263635	TANC1	4.00913	3.5732	3.75203	4.10179	312.175	0.0747821	0.131736	0.567666	0.570262	0.913882	TANC1	5.94593	5.42727	6.0253	6.31575	143.939	0.260008	0.18572	1.4	0.161512	0.321029
ENST00000263650	OSBPL5	3.07452	3.03198	1.96188	1.74378	101.733	-0.696588	0.228729	-3.04547	0.00232313	0.0318572	OSBPL5	2.92942	3.59078	4.98756	3.94414	45.1481	0.586847	0.33919	1.73014	0.0836045	0.195282
ENST00000263657	PNO1	26.7171	28.5019	25.7151	25.6198	643.787	-0.0811797	0.090138	-0.900616	0.367792	0.815467	PNO1	121.236	115.508	119.772	138.917	362.377	0.279934	0.120768	2.31795	0.0204519	0.0634875
ENST00000263663	TAF1B	19.0329	18.8878	17.7418	18.8524	455.305	-0.0273274	0.106686	-0.256148	0.797836	0.968264	TAF1B	38.3475	33.6385	32.4045	28.1861	257.407	-0.099424	0.143819	-0.691314	0.489369	0.677255
ENST00000263674	ARHGEF17	3.21349	3.42357	3.25478	2.76575	278.414	-0.116617	0.14026	-0.83144	0.405725	0.841909	ARHGEF17	0.944556	0.509985	1.26688	0.942726	25.5107	0.715329	0.466803	1.5324	0.125424	0.267772
ENST00000263681	POLD3	14.3892	13.7846	14.6378	15.0527	591.001	0.0996799	0.0934521	1.06664	0.286134	0.754077	POLD3	26.5829	27.0927	27.1381	23.9522	161.94	0.0534791	0.174948	0.305685	0.759844	0.869868
ENST00000263694	SNRNP40	38.3041	39.5167	43.3065	39.7927	700.761	0.118714	0.0870352	1.36398	0.172575	0.616311	SNRNP40	101.759	100.003	109.814	118.429	508.2	0.298774	0.101958	2.93038	0.00338545	0.0137928
ENST00000263697	DNAJC8	45.2396	45.9793	46.2232	45.6844	870.337	0.0348907	0.0763532	0.456965	0.647696	0.940862	DNAJC8	114.155	104.24	151.623	126.002	416.143	0.489817	0.117969	4.1521	3.29e-05	0.000208131
ENST00000263702	MECR	7.21334	6.23829	7.43247	6.42994	185.205	0.0674056	0.171847	0.392242	0.69488	0.956201	MECR	13.247	17.488	13.5618	17.2291	75.4001	0.139249	0.266882	0.521763	0.601835	0.763792
ENST00000263707	TFCP2L1	1.03831	1.43422	1.30039	0.972406	118.753	-0.0974576	0.227669	-0.428067	0.668602	0.947526	TFCP2L1	4.21339	3.51432	1.93611	2.2949	19.2345	-0.737899	0.525673	-1.40372	0.160401	0.319902
ENST00000263708	PTPN4	3.73592	3.25682	3.45631	3.80644	426.245	0.0786839	0.115309	0.682374	0.495002	0.883666	PTPN4	1.65341	2.72682	1.72988	1.82632	24.507	-0.100611	0.463135	-0.217238	0.828023	0.910399
ENST00000263710	CLASP1	9.30091	8.88647	9.52557	8.83722	797.323	0.037875	0.0817269	0.463434	0.643054	0.938154	CLASP1	10.9504	10.7171	10.5249	9.34651	211.995	0.00313566	0.153418	0.0204387	0.983693	0.993408
ENST00000263713	EPB41L5	3.16604	4.10071	3.49195	3.57183	253.229	-0.0167955	0.153687	-0.109283	0.912978	0.985986	EPB41L5	10.8236	10.9085	8.85646	8.53659	93.948	-0.175524	0.231059	-0.759651	0.447463	0.640733
ENST00000263726	LHX4	2.11149	1.9436	1.81494	1.92264	122.722	-0.0935977	0.205328	-0.455846	0.648501	0.94094	LHX4	1.07067	1.43877	1.51324	2.16816	9.78458	0.88449	0.741018	1.19362	0.232629	0.415818
ENST00000263733	FAM20B	20.5695	19.8866	20.8592	20.9281	1328.41	0.0707422	0.0618696	1.14341	0.252869	0.720212	FAM20B	25.0128	27.7816	12.1619	8.89	98.2918	-1.1877	0.242214	-4.90354	9.41e-07	7.48e-06
ENST00000263734	EPAS1	54.8807	54.2443	56.7957	56.0996	3085.7	0.0730386	0.0401594	1.81872	0.0689542	0.379494	EPAS1	48.2355	49.0173	28.5875	29.3525	438.717	-0.606847	0.109347	-5.54973	2.86e-08	2.73e-07
ENST00000263736	SRBD1	9.60479	9.47067	10.9683	9.679	392.792	0.138262	0.116869	1.18305	0.23679	0.703577	SRBD1	7.7637	8.81154	8.64273	8.49833	110.955	0.159498	0.212615	0.750172	0.453151	0.645595
ENST00000263753	SGO1	8.14391	9.12218	9.43248	8.89294	224.37	0.109952	0.153481	0.716391	0.47375	0.871674	SGOL1	15.6306	18.754	14.7278	14.7713	117.253	-0.0750798	0.20851	-0.360078	0.718789	0.845938
ENST00000263754	KAT2B	6.43002	5.61444	5.69128	6.0243	282.431	-0.0159175	0.138508	-0.114921	0.908508	0.985351	KAT2B	2.92761	3.79362	1.72266	1.62612	27.2092	-0.827859	0.444511	-1.86241	0.062546	0.155881
ENST00000263773	FNBP4	12.4553	12.7787	12.2843	12.3095	541.925	-0.013033	0.0972117	-0.134069	0.893348	0.983379	FNBP4	7.73262	8.75887	15.9167	15.6313	163.935	1.04608	0.178056	5.87498	4.23e-09	4.38e-08
ENST00000263774	NDUFS3	78.0624	70.7467	67.0733	71.7676	693.029	-0.0760011	0.0895582	-0.848622	0.396091	0.836641	NDUFS3	152.631	156.752	186.182	172.64	592.508	0.351759	0.0945801	3.71917	0.000199881	0.00109717
ENST00000263776	ACCS	3.73787	4.42352	4.80345	3.83371	107.935	0.105787	0.224669	0.470855	0.637744	0.936851	ACCS	5.55637	5.59999	6.22641	6.75117	40.5348	0.31827	0.350021	0.909287	0.363199	0.560986
ENST00000263780	CHMP2B	41.6482	43.7917	38.8434	40.8276	1152.44	-0.0768078	0.0677334	-1.13397	0.256806	0.725458	CHMP2B	203.553	200.87	202.262	212.389	591.305	0.145895	0.0942362	1.54818	0.121579	0.261083
ENST00000263791	EIF2AK4	10.7129	11.3321	10.9035	11.4148	662.321	0.0418253	0.0889295	0.47032	0.638126	0.936851	EIF2AK4	10.0444	12.0374	13.3442	12.7684	261.501	0.355597	0.142037	2.50355	0.0122954	0.0416881
ENST00000263795	WDR76	13.4258	12.6563	14.075	11.9376	552.17	0.0201705	0.102614	0.196567	0.844166	0.976002	WDR76	21.0115	23.4173	25.8583	22.4228	191.302	0.229133	0.163828	1.39861	0.161929	0.321651
ENST00000263798	TYRO3	2.41127	2.65534	2.94178	2.41865	225.814	0.105364	0.157156	0.670441	0.502577	0.885612	TYRO3	3.51877	3.46759	5.11537	4.94049	49.8972	0.661108	0.317232	2.08399	0.0371608	0.103388
ENST00000263847	OSBP	11.0449	11.2525	11.5421	10.9175	568.645	0.0344862	0.0953882	0.361536	0.717699	0.960728	OSBP	33.7188	37.6339	29.7745	32.063	352.975	-0.0893806	0.122696	-0.72847	0.466326	0.657334
ENST00000263849	ZC2HC1A	2.66635	2.69092	2.72848	2.41107	93.644	-0.0358244	0.233882	-0.153173	0.878262	0.981012	ZC2HC1A	20.5569	17.481	20.753	18.9931	83.7029	0.176387	0.246214	0.716398	0.473746	0.663826
ENST00000263857	POLR1A	16.7628	16.8668	15.7775	16.6348	2221.46	-0.0291531	0.048477	-0.60138	0.547587	0.90402	POLR1A	19.7856	19.3293	15.4403	14.9452	391.272	-0.232	0.114149	-2.03243	0.0421097	0.11481
ENST00000263864	VAMP8	1.80527	1.32381	1.70127	2.01047	12.5305	0.270369	0.64325	0.420317	0.674254	0.949295	VAMP8	77.9448	86.9735	94.426	94.7054	117.303	0.307953	0.207047	1.48736	0.136919	0.285331
ENST00000263867	CAPG	17.9127	17.0621	19.0707	19.6576	248.458	0.171104	0.144017	1.18808	0.234802	0.702344	CAPG	107.79	101.783	135.67	128.296	554.258	0.481609	0.0981908	4.90483	9.35e-07	7.44e-06
ENST00000263881	MAP4K3	13.7046	13.6286	13.7113	12.9595	631.018	-0.0113606	0.0905272	-0.125494	0.900132	0.984803	MAP4K3	19.2277	19.8494	11.4109	11.9176	183.727	-0.555195	0.165947	-3.34561	0.000821003	0.00393022
ENST00000263897	USE1	4.83543	5.22203	4.10117	5.84071	45.5539	0.00739584	0.337474	0.0219153	0.982516	0.997793	USE1	15.8534	16.5194	20.5076	13.3857	57.7669	0.225276	0.307336	0.732995	0.463562	0.654854
ENST00000263904	STAM2	6.73522	6.37653	5.22004	6.19842	361.637	-0.175451	0.124573	-1.40841	0.159009	0.591333	STAM2	42.5515	39.9463	27.4606	27.5419	232.988	-0.453508	0.147409	-3.07653	0.00209422	0.00904017
ENST00000263915	GRB14	10.1852	10.1848	9.43612	11.4357	268.518	0.059161	0.143455	0.412401	0.680046	0.950579	GRB14	7.73262	8.70254	7.49413	5.32405	51.427	-0.200297	0.317329	-0.631198	0.527911	0.705439
ENST00000263918	STRN	4.56043	4.58905	4.94179	5.11929	734.304	0.161065	0.0834126	1.93094	0.0534903	0.328074	STRN	33.9045	28.3257	16.3213	18.5378	244.243	-0.705099	0.15162	-4.65044	3.31e-06	2.47e-05
ENST00000263921	CHIC2	2.94747	3.6105	3.59835	3.7875	41.7056	0.195579	0.347151	0.563384	0.573173	0.915537	CHIC2	21.9325	16.5785	19.9276	20.499	42.1023	0.237495	0.349181	0.680148	0.496411	0.682423
ENST00000263955	STK17B	4.27733	4.66457	4.42126	4.75954	257.631	0.0620922	0.142981	0.434268	0.664094	0.946368	STK17B	17.7725	19.609	14.2781	15.2296	84.3399	-0.142586	0.245245	-0.5814	0.560971	0.733124
ENST00000263956	GTF3C3	12.9262	12.5804	13.7769	13.6282	607.945	0.127607	0.0916947	1.39166	0.164027	0.599858	GTF3C3	24.2713	26.5202	28.2616	30.922	322.104	0.366591	0.126344	2.90154	0.00371338	0.014961
ENST00000263960	COQ10B	10.1464	11.2409	11.9133	11.2559	269.015	0.139503	0.140107	0.995688	0.319402	0.781674	COQ10B	75.4417	82.8122	94.9361	80.6503	260.085	0.30824	0.142272	2.16656	0.0302686	0.0875343
ENST00000263966	USP13	3.53796	3.5988	3.16168	3.23987	293.216	-0.132805	0.132535	-1.00204	0.316326	0.781184	USP13	9.67697	10.4844	7.22927	7.15268	97.4502	-0.411885	0.228685	-1.8011	0.0716871	0.173837
ENST00000263967	PIK3CA	2.57715	2.55056	2.41583	2.57446	252.512	-0.0151522	0.143056	-0.105918	0.915647	0.986019	PIK3CA	5.99495	6.04201	4.49963	4.988	76.71	-0.217281	0.256493	-0.847124	0.396926	0.594693
ENST00000263974	TAF12	14.6721	14.3708	13.9093	13.8311	207.983	-0.0421615	0.157159	-0.268273	0.788489	0.968264	TAF12	45.8194	47.0504	43.4636	40.441	93.2518	-0.0121858	0.231259	-0.0526932	0.957976	0.979671
ENST00000263980	SLC9A1	1.5181	1.46628	1.5075	1.61824	78.0388	0.0908024	0.254298	0.357071	0.721039	0.960728	SLC9A1	4.26954	4.81943	4.24131	4.15011	46.8452	0.0275843	0.326294	0.0845382	0.932629	0.968349
ENST00000263985	GATB	8.96871	8.10598	9.26472	7.84572	218.312	0.0270308	0.1584	0.170649	0.8645	0.979578	GATB	18.3667	13.348	13.4713	15.7883	111.562	0.0534396	0.224476	0.238064	0.811831	0.900428
ENST00000263991	EHBP1	22.2769	22.2917	21.6536	23.5837	1250.47	0.0455309	0.0656106	0.693957	0.487709	0.880563	EHBP1	20.0131	19.6004	14.314	14.219	275.752	-0.352522	0.134688	-2.61732	0.00886229	0.0315593
ENST00000263997	SLC7A6OS	3.66574	3.80206	3.68342	3.23219	162.446	-0.0867957	0.179785	-0.482774	0.629256	0.933964	SLC7A6OS	12.3872	10.2145	10.9138	10.1251	43.8896	0.0338603	0.338716	0.0999667	0.920371	0.961281
ENST00000264001	CKLF	37.9888	42.5065	46.9349	49.9144	320.071	0.290892	0.129252	2.25058	0.024412	0.193165	CKLF	59.9787	64.1411	36.0532	26.7027	90.5785	-0.831958	0.247679	-3.35902	0.000782204	0.00376778
ENST00000264005	LCAT	0.710123	0.983204	1.26355	0.912507	15.62	0.385909	0.577556	0.668176	0.504022	0.886735	LCAT	0.474501	0.478227	0.766445	1.15307	4.17361	1.16242	1.18415	0.98165	0.326272	0.525506
ENST00000264020	IFT46	11.9051	12.2191	11.4887	11.1416	229.198	-0.068185	0.149894	-0.454887	0.64919	0.941142	IFT46	13.9187	14.8183	10.4496	16.1971	63.9625	0.0556373	0.291582	0.190812	0.848673	0.923028
ENST00000264025	NECTIN1	2.09922	2.16773	1.83371	1.90412	128.45	-0.166963	0.200168	-0.834117	0.404215	0.840899	PVRL1	9.82656	8.54703	21.8518	23.8792	110.171	1.45656	0.223014	6.53125	6.52e-11	7.79e-10
ENST00000264027	SC5D	2.76608	2.8375	2.58937	2.57389	198.863	-0.0940278	0.160857	-0.584543	0.558855	0.908236	SC5D	38.1717	42.4593	25.6592	20.9275	124.047	-0.684602	0.207083	-3.30593	0.000946608	0.00445405
ENST00000264033	CBL	3.45373	3.35114	3.04664	3.06526	388.693	-0.130914	0.115157	-1.13684	0.255607	0.72423	CBL	11.7526	12.0771	10.1431	11.0131	134.634	-0.0793319	0.193051	-0.410938	0.681118	0.819976
ENST00000264036	MCAM	2.23517	2.11226	2.65141	2.43031	84.6211	0.249181	0.244949	1.01728	0.309022	0.772962	MCAM	2.37006	3.69157	1.17458	0.654477	16.2858	-1.6015	0.619696	-2.58433	0.00975685	0.0341848
ENST00000264039	GPC1	18.8311	18.3689	11.7468	13.4119	624.163	-0.540202	0.0948564	-5.69494	1.23e-08	5.83e-07	GPC1	49.8878	53.422	29.3117	24.2461	283.285	-0.834447	0.140195	-5.95206	2.65e-09	2.8e-08
ENST00000264042	FARP2	2.69066	2.54787	2.75045	3.01222	118.939	0.161613	0.208063	0.776749	0.437307	0.856685	FARP2	6.93294	6.52155	6.31917	6.57855	90.2367	0.0838251	0.236937	0.353786	0.723499	0.848007
ENST00000264051	NGEF	4.8251	4.59391	4.12276	4.08953	151.245	-0.173761	0.184811	-0.940209	0.34711	0.800145	NGEF	8.03756	8.00188	5.46227	7.26488	68.1034	-0.172656	0.2764	-0.624659	0.532195	0.709435
ENST00000264057	DGKD	20.0241	20.3477	18.4281	19.4275	1327.54	-0.0688003	0.0624681	-1.10137	0.270737	0.739515	DGKD	13.9875	14.7906	8.6809	9.40312	184.683	-0.530228	0.166837	-3.17813	0.00148228	0.00667293
ENST00000264065	DNAJC10	8.05666	7.95084	8.01792	8.06434	1742.58	0.0307591	0.0536266	0.573579	0.566253	0.912455	DNAJC10	54.1478	50.7696	18.6054	15.2482	354.992	-1.48538	0.131665	-11.2815	1.62e-29	4.91e-28
ENST00000264071	TUBB4A	2.36866	1.86613	0.876277	1.15293	38.3374	-1.03736	0.380697	-2.72489	0.00643232	0.0704242	TUBB4A	10.0315	13.2697	8.35494	7.99877	57.75	-0.380365	0.302508	-1.25737	0.208619	0.385413
ENST00000264079	MCOLN1	2.98015	2.62712	2.2676	1.71319	53.7881	-0.47024	0.312848	-1.50309	0.132815	0.540566	MCOLN1	9.7191	9.7954	4.07009	3.64476	50.7236	-1.21346	0.330788	-3.66841	0.000244065	0.00131524
ENST00000264080	GPR108	19.069	19.9421	18.8894	20.4197	434.304	0.0350264	0.110022	0.31836	0.750212	0.964026	GPR108	23.4542	25.9634	10.0922	9.4992	122.555	-1.13455	0.212192	-5.3468	8.95e-08	8.09e-07
ENST00000264093	DGUOK	42.7978	43.7841	42.8852	43.8594	502.282	0.0267491	0.101036	0.26475	0.791202	0.968264	DGUOK	117.58	116.478	154.313	155.99	504.519	0.538009	0.101108	5.32115	1.03e-07	9.26e-07
ENST00000264108	HAT1	39.6591	43.7081	46.0806	41.9648	755.197	0.102813	0.0867456	1.18522	0.23593	0.702652	HAT1	102.979	102.95	115.497	112.812	602.239	0.28493	0.0931658	3.05832	0.00222585	0.0095353
ENST00000264110	ATF2	9.49853	10.2438	11.1976	10.3647	463.806	0.151254	0.107282	1.40987	0.158578	0.590263	ATF2	30.318	28.6115	23.7067	22.9396	175.033	-0.166549	0.168661	-0.987481	0.323407	0.523007
ENST00000264144	LAMC2	13.6248	12.9733	14.513	14.2787	806.266	0.138357	0.0800099	1.72924	0.0837656	0.426192	LAMC2	31.8509	31.6894	60.4226	61.1684	729.69	1.08583	0.0868427	12.5034	7.15e-36	2.62e-34
ENST00000264151	OSGEPL1	5.39087	5.26228	4.7834	4.78311	104.06	-0.131181	0.221432	-0.592421	0.553569	0.906656	OSGEPL1	12.9437	9.82636	10.5895	14.0931	64.6775	0.280695	0.286097	0.981118	0.326534	0.525654
ENST00000264156	MCM6	25.5847	25.9538	25.4353	26.2731	1044.56	0.0287896	0.0698126	0.412384	0.680058	0.950579	MCM6	83.3258	78.4268	81.5363	77.7608	873.007	0.107252	0.0801024	1.33894	0.180592	0.348117
ENST00000264157	CCNT2	6.32966	6.17587	6.51032	6.50992	476.244	0.0822246	0.103672	0.793125	0.427705	0.852473	CCNT2	6.00602	5.28451	7.04499	6.13917	59.1413	0.351818	0.292596	1.2024	0.229209	0.412442
ENST00000264159	ZRANB3	2.4837	2.17923	2.92577	2.4406	181.572	0.226718	0.174354	1.30033	0.193489	0.648095	ZRANB3	3.35391	4.74533	5.23512	3.84	62.0299	0.30781	0.301027	1.02253	0.306528	0.505669
ENST00000264161	DARS1	28.7163	28.0558	26.33	29.4796	940.442	-0.000624786	0.0769063	-0.00812399	0.993518	0.99897	DARS	112.1	108.22	135.971	118.314	783.702	0.345642	0.0870129	3.97231	7.12e-05	0.000424785
ENST00000264167	AGPS	18.6856	18.4284	18.0265	17.3939	1495.32	-0.0433491	0.0583849	-0.742472	0.457802	0.867259	AGPS	59.1228	56.3891	54.7111	55.13	486.258	0.0612704	0.102864	0.595644	0.551413	0.72567
ENST00000264170	KYNU	22.8366	23.2077	24.1484	24.3825	3863.53	0.0999216	0.0358459	2.78753	0.00531115	0.0608512	KYNU	554.204	583.142	645.462	611.003	3678.37	0.289611	0.0413877	6.99752	2.61e-12	3.47e-11
ENST00000264183	ARID4B	10.1232	10.1635	9.73071	9.60805	643.132	-0.045005	0.0890525	-0.505376	0.613295	0.929143	ARID4B	6.73657	6.04101	7.5184	5.5427	112.002	0.174828	0.218901	0.798665	0.424485	0.618554
ENST00000264187	NID1	0.395049	0.592548	0.362621	0.344469	26.4225	-0.457942	0.44782	-1.0226	0.306495	0.771408	NID1	3.62757	3.26232	1.14936	1.28838	37.0128	-1.35902	0.391343	-3.47272	0.000515212	0.00259365
ENST00000264198	MUL1	14.809	16.2219	16.6951	16.0886	417.769	0.103323	0.112563	0.917916	0.358663	0.807951	MUL1	31.6334	34.4722	13.6523	16.0949	112.324	-0.980397	0.220232	-4.45166	8.52e-06	5.96e-05
ENST00000264218	NMU	1.70247	1.7024	1.28695	0.900808	12.2796	-0.614134	0.659472	-0.93125	0.351724	0.804185	NMU	11.199	10.8838	29.5566	31.1019	47.861	1.60959	0.339632	4.73921	2.15e-06	1.64e-05
ENST00000264220	PPAT	17.9107	16.9112	16.9986	16.4557	677.568	-0.0337709	0.0878378	-0.384469	0.700631	0.956291	PPAT	30.6912	28.2188	25.4394	26.8232	189.935	-0.0378056	0.162193	-0.23309	0.815691	0.902657
ENST00000264228	SRD5A3	2.83732	3.07865	3.15484	2.6375	128.161	-0.00643281	0.203582	-0.0315982	0.974793	0.996614	SRD5A3	20.5717	22.9388	11.4003	8.24312	65.0158	-1.00476	0.294486	-3.41193	0.000645053	0.00316122
ENST00000264230	NOA1	16.8374	14.9946	14.2513	13.8717	358.293	-0.154706	0.122733	-1.2605	0.207488	0.663723	NOA1	14.4571	12.7618	14.132	14.6584	128.042	0.195164	0.199386	0.978827	0.327666	0.526586
ENST00000264245	ARHGAP31	1.65949	1.52771	1.60225	1.34265	153.797	-0.0900588	0.186878	-0.481912	0.629869	0.933964	ARHGAP31	0.819315	0.777173	0.4087	0.585585	12.2067	-0.574671	0.659178	-0.871801	0.383317	0.582046
ENST00000264249	CHST10	4.72445	6.24173	7.35914	6.80679	193.556	0.393431	0.173963	2.26157	0.0237238	0.189499	CHST10	13.4886	15.5648	5.2101	3.32533	43.3258	-1.46293	0.370652	-3.94692	7.92e-05	0.000468816
ENST00000264254	PDCL3	15.6667	15.8235	17.4013	18.1084	187.568	0.197355	0.165403	1.19318	0.232799	0.699474	PDCL3	114.436	107.998	118.526	135.152	374.898	0.348086	0.118325	2.94179	0.00326326	0.0133736
ENST00000264255	TXNDC9	23.5727	22.7589	25.5573	22.6311	384.297	0.080718	0.118152	0.683172	0.494498	0.883376	TXNDC9	104.39	89.6922	114.899	106.259	311.014	0.320706	0.129339	2.47957	0.0131539	0.0439834
ENST00000264263	GFM1	37.3213	35.2135	35.9782	36.8579	1353.18	0.0300125	0.0623764	0.481151	0.630409	0.933984	GFM1	39.4966	39.169	46.4247	47.5504	439.535	0.392103	0.107593	3.64431	0.000268106	0.00143729
ENST00000264265	LXN	26.6292	28.2303	28.9257	23.0411	308.344	-0.0541203	0.137437	-0.393783	0.693741	0.956109	LXN	103.45	102.05	110.513	115.411	317.443	0.281975	0.125022	2.2554	0.0241085	0.0726187
ENST00000264276	ALS2	5.72949	5.53337	5.36481	5.89935	405.349	0.0242061	0.114181	0.211998	0.832109	0.975453	ALS2	6.25796	6.47641	6.2583	6.17475	134.798	0.0899474	0.191776	0.469024	0.639052	0.78986
ENST00000264279	NOP58	62.8259	65.7327	63.6725	64.4586	1379.74	0.0192388	0.0610949	0.314901	0.752837	0.964633	NOP58	72.4878	74.1176	83.5121	87.9152	555.258	0.371655	0.0976054	3.80773	0.000140249	0.000792675
ENST00000264313	SLAIN2	3.95088	4.32697	3.78199	3.72995	258.728	-0.116021	0.142398	-0.81477	0.415204	0.84683	SLAIN2	15.4519	15.2111	16.3974	15.8638	120.652	0.204504	0.202579	1.0095	0.312735	0.512225
ENST00000264331	TOP2B	54.4944	54.1565	53.7422	53.9153	3124.14	0.0107872	0.0398055	0.270997	0.786393	0.968264	TOP2B	34.1976	33.1288	24.4734	24.0258	618.507	-0.336303	0.0929261	-3.61904	0.000295701	0.00157095
ENST00000264335	YWHAE	312.498	311.051	326.662	324.237	7050.96	0.0859655	0.0262028	3.28077	0.00103524	0.0161754	YWHAE	1639.95	1663.28	1721.22	1773.07	5743.79	0.219862	0.0311946	7.04806	1.81e-12	2.43e-11
ENST00000264344	FAM13A	3.05087	3.20397	2.50632	2.79259	182.573	-0.215225	0.16975	-1.2679	0.204835	0.65979	FAM13A	4.55794	4.18234	3.46136	4.21552	55.1016	-0.0160139	0.302925	-0.0528643	0.95784	0.979671
ENST00000264346	HERC6	2.78955	2.27047	2.58438	2.66759	105.067	0.0777309	0.224451	0.346316	0.729105	0.961608	HERC6	6.74145	6.38259	5.5271	6.20536	82.83	-0.032278	0.247269	-0.130538	0.89614	0.948826
ENST00000264350	HERC5	2.53698	2.46705	2.333	2.87121	96.6335	0.0806371	0.232695	0.346535	0.72894	0.961608	HERC5	5.91273	5.95915	4.93998	5.36748	74.7162	-0.0343107	0.258867	-0.132542	0.894556	0.947964
ENST00000264377	ADAM23	0.425753	0.451536	0.464228	0.563671	32.5517	0.252631	0.391936	0.644572	0.519205	0.895336	ADAM23	4.68418	5.81689	0.810663	0.711429	33.4042	-2.6415	0.48686	-5.42559	5.78e-08	5.33e-07
ENST00000264380	PIKFYVE	5.15485	5.94637	5.82945	6.34841	621.996	0.157607	0.0972811	1.62012	0.105206	0.480565	PIKFYVE	3.81471	4.44643	2.45131	3.58708	97.9911	-0.253005	0.236053	-1.07181	0.283804	0.479286
ENST00000264399	PRKG2	0.457571	0.440604	0.370231	0.566201	23.852	0.0842385	0.464449	0.181373	0.856075	0.978878	PRKG2	0.36532	0.552283	0.110642	0	2.43712	-2.89802	2.00247	-1.44722	0.147836	NA
ENST00000264414	CUL3	12.1562	12.6153	11.6424	11.4396	871.256	-0.0778672	0.0767905	-1.01402	0.310573	0.774266	CUL3	51.9233	50.2304	32.8234	30.168	415.104	-0.554997	0.112336	-4.94052	7.79e-07	6.27e-06
ENST00000264428	GLRB	2.07463	1.67041	2.49294	1.97345	67.1865	0.278126	0.280724	0.990747	0.321809	0.782109	GLRB	4.20082	5.36281	1.18745	0.510413	17.9222	-2.38306	0.644253	-3.69894	0.000216498	0.00117899
ENST00000264433	FNIP2	1.56749	1.28877	1.59656	1.4771	112.54	0.129836	0.21734	0.597384	0.550251	0.904856	FNIP2	1.74921	2.14071	0.832494	0.834957	20.2409	-0.944604	0.517062	-1.82687	0.0677196	0.166167
ENST00000264434	C2orf42	4.97088	5.41391	4.51633	5.24839	140.156	-0.0647613	0.194395	-0.333143	0.739026	0.961733	C2orf42	4.00102	5.00999	3.52511	4.56674	32.1927	-0.0415416	0.397598	-0.104481	0.916787	0.959378
ENST00000264436	ADD2	6.34222	6.97525	6.3642	6.63509	658.981	-0.0108344	0.0907203	-0.119427	0.904937	0.984821	ADD2	19.5552	20.7715	13.7031	14.0931	160.935	-0.406232	0.177332	-2.2908	0.021975	0.0672549
ENST00000264444	MXD1	0.765791	0.589044	1.00303	0.889421	48.6417	0.506135	0.32539	1.55547	0.119834	0.516807	MXD1	3.77884	6.66488	5.34084	9.56543	18.6353	0.702262	0.544606	1.28949	0.197229	0.369735
ENST00000264451	SLC30A9	14.7688	14.3306	13.2035	14.0034	935.344	-0.0729772	0.07477	-0.976023	0.329053	0.789409	SLC30A9	21.5642	19.6342	15.14	16.6735	136.455	-0.239445	0.192462	-1.24412	0.213456	0.391837
ENST00000264454	SEC22C	8.04298	8.46796	9.14325	9.09301	594.098	0.167432	0.0931896	1.79668	0.0723864	0.391223	SEC22C	31.9258	31.2504	23.651	20.3722	108.862	-0.349703	0.216212	-1.61741	0.10579	0.235007
ENST00000264498	FGF2	24.98	25.3046	21.964	22.7996	1735.06	-0.143746	0.054307	-2.64691	0.00812302	0.0853834	FGF2	23.1978	23.867	12.8805	15.8547	71.8014	-0.574818	0.270035	-2.12868	0.0332808	0.0943948
ENST00000264499	BBS7	4.63924	5.40512	4.18419	4.94962	198.443	-0.113027	0.167901	-0.673177	0.500835	0.885612	BBS7	8.37069	10.1041	7.54653	8.7515	82.125	-0.0885828	0.250923	-0.353028	0.724067	0.848351
ENST00000264501	KIAA1109	6.25126	6.5954	6.95651	6.61258	1132.19	0.102972	0.0683438	1.50667	0.131895	0.539124	KIAA1109	1.14019	1.27527	1.1623	0.996793	73.858	-0.00153744	0.26357	-0.00583314	0.995346	0.997923
ENST00000264515	RBBP5	10.6101	10.5348	11.6389	11.3737	520.011	0.146147	0.0991252	1.47437	0.140382	0.556054	RBBP5	23.8015	27.2477	17.5513	20.7467	159.466	-0.287398	0.181337	-1.58488	0.112993	0.246891
ENST00000264538	IFT57	13.0451	12.8841	12.3325	11.576	410.56	-0.0930209	0.112466	-0.827106	0.408177	0.843588	IFT57	30.9845	31.7183	27.3169	27.3977	167.751	-0.0481219	0.17169	-0.280284	0.77926	0.882761
ENST00000264552	UBE2S	68.3384	69.7085	60.243	62.5373	1798.38	-0.145037	0.0534504	-2.71349	0.00665785	0.0725071	UBE2S	464.897	446.115	455.344	447.169	1342.37	0.114691	0.0639195	1.7943	0.0727651	0.17566
ENST00000264555	PHRF1	16.0221	14.5757	9.99149	10.3511	759.346	-0.564898	0.0860842	-6.56216	5.3e-11	3.17e-09	PHRF1	7.55442	8.76217	8.38488	8.71736	180.685	0.20988	0.168007	1.24923	0.21158	0.389374
ENST00000264563	IL11	9.89697	10.5151	10.6428	9.27325	258.489	-0.011452	0.144051	-0.0794996	0.936635	0.990382	IL11	1.74858	1.05739	2.11831	2.97442	5.10353	0.715739	1.05056	0.681294	0.495686	0.682111
ENST00000264595	AGA	9.06649	9.42713	7.78461	9.94926	198.896	-0.0364598	0.168186	-0.216783	0.828378	0.974172	AGA	31.1763	34.8672	7.31002	6.59849	88.6132	-2.13456	0.276653	-7.71565	1.2e-14	1.85e-13
ENST00000264596	NEIL3	18.398	18.0859	18.3098	18.9753	469.947	0.05538	0.104557	0.529663	0.596345	0.923784	NEIL3	20.0153	23.8823	25.3624	23.7602	185.089	0.334985	0.166144	2.01624	0.0437749	0.118516
ENST00000264605	MLPH	32.2597	32.9349	33.6586	31.6372	1317	0.0262751	0.0630451	0.416766	0.676849	0.949563	MLPH	71.9133	71.3089	55.9249	51.8625	493.458	-0.252327	0.103309	-2.44245	0.0145881	0.0477621
ENST00000264607	ASB1	6.11912	6.29673	5.59287	5.86682	443.365	-0.0915696	0.108099	-0.847094	0.396943	0.836641	ASB1	17.8658	20.7279	15.3518	14.64	75.7109	-0.226195	0.260172	-0.869407	0.384625	0.583103
ENST00000264613	CP	4.09328	4.57032	3.72694	4.17487	198.728	-0.108723	0.164225	-0.662039	0.507946	0.890459	CP	29.0136	29.3073	7.20386	7.62217	251.472	-1.79572	0.155927	-11.5164	1.09e-30	3.41e-29
ENST00000264637	THRA	10.1746	9.78779	9.39259	11.0056	276.161	0.0552023	0.140101	0.394017	0.693568	0.95609	THRA	8.94774	6.44142	3.44118	2.58852	33.0499	-1.36889	0.427584	-3.20146	0.00136731	0.00620273
ENST00000264638	CNTNAP1	1.44635	1.80048	1.72591	1.36547	94.5829	-0.0467292	0.241067	-0.193844	0.846298	0.977061	CNTNAP1	3.26848	3.69958	1.34017	2.0162	46.4444	-0.907055	0.343881	-2.6377	0.00834704	0.0299656
ENST00000264639	PSMD3	120.237	120.46	125.803	128.73	2866.89	0.104666	0.0417833	2.50497	0.0122462	0.116067	PSMD3	164.34	163.003	177.775	181.151	1218.19	0.268309	0.0666314	4.02677	5.65e-05	0.000341908
ENST00000264645	CASC3	24.0955	24.9137	24.3775	25.2398	1034.27	0.0418378	0.0704983	0.593459	0.552874	0.905999	CASC3	38.0141	33.8228	29.1423	33.3182	311.617	-0.065486	0.131852	-0.496662	0.619427	0.776493
ENST00000264649	ATP6V0A1	12.1286	11.79	12.009	11.6506	527.11	0.0083232	0.0987848	0.0842559	0.932853	0.988519	ATP6V0A1	15.6959	15.0658	10.1613	9.28326	134.68	-0.544189	0.194817	-2.79333	0.00521686	0.020072
ENST00000264657	STAT3	47.9917	48.5563	51.4775	49.3521	2685.84	0.0866369	0.0437906	1.97844	0.0478793	0.30724	STAT3	101.227	100.109	80.0387	88.5118	932.993	-0.11705	0.0773625	-1.51301	0.130278	0.275663
ENST00000264663	NNT	10.2353	9.86934	10.1403	10.5608	713.219	0.0662092	0.085138	0.777669	0.436764	0.856302	NNT	14.0341	13.1109	18.7871	18.6091	232.852	0.611059	0.146423	4.17324	3e-05	0.000192067
ENST00000264668	MTRR	14.8262	15.0751	16.6151	16.5499	556.844	0.173491	0.0956968	1.81293	0.0698428	0.382337	MTRR	21.406	23.2187	22.6762	24.4928	219.418	0.224945	0.151149	1.48824	0.136688	0.284897
ENST00000264669	FASTKD3	10.051	8.30261	8.42366	9.20066	235.736	-0.0344751	0.154633	-0.222948	0.823576	0.973353	FASTKD3	9.88186	8.89993	8.40542	8.94122	78.0901	0.012948	0.254623	0.0508519	0.959444	0.980495
ENST00000264670	NSUN2	44.4961	43.9861	46.1846	46.9721	1496.67	0.0983101	0.05796	1.69617	0.0898532	0.443568	NSUN2	57.3444	59.8978	63.2042	66.6986	624.507	0.308283	0.0923364	3.3387	0.000841723	0.00402009
ENST00000264689	UFSP2	7.44156	7.75273	6.71633	6.0043	177.533	-0.232324	0.172117	-1.3498	0.17708	0.623727	UFSP2	20.0323	19.1427	20.3132	18.3901	119.834	0.113865	0.205696	0.553558	0.579881	0.749598
ENST00000264705	CAD	23.8113	23.1485	23.9404	22.4977	1834.33	0.00791377	0.0539331	0.146733	0.883343	0.981632	CAD	22.6453	21.3414	21.1057	20.9401	632.792	0.0572964	0.0921762	0.621596	0.534207	0.710608
ENST00000264709	DNMT3A	1.84923	1.73734	1.87902	1.70206	183.576	0.0218141	0.168799	0.129231	0.897175	0.983978	DNMT3A	6.33362	5.9219	4.25242	4.17229	61.1043	-0.382175	0.288584	-1.32431	0.185399	0.354562
ENST00000264710	RAB10	100.49	99.2239	93.8971	97.1056	3749.95	-0.0403062	0.036924	-1.0916	0.275009	0.744143	RAB10	506.293	530.959	343.137	355.145	1129.85	-0.437737	0.0707242	-6.18936	6.04e-10	6.69e-09
ENST00000264711	DNAJC27	1.33191	1.21384	1.38662	1.36487	69.2369	0.136147	0.269624	0.504953	0.613592	0.929143	DNAJC27	1.52953	1.54154	1.85294	2.4779	6.54238	0.424974	0.904173	0.470014	0.638345	0.789675
ENST00000264712	KIF3C	10.5246	10.8913	10.0061	10.0055	596.403	-0.0738033	0.092822	-0.795105	0.426552	0.851567	KIF3C	10.8822	11.1445	6.06004	7.03765	91.1134	-0.591977	0.238954	-2.47736	0.0132357	0.0441509
ENST00000264716	FOSL2	50.7014	50.3949	53.8763	51.8238	3742.92	0.0882812	0.0370346	2.38375	0.0171371	0.148034	FOSL2	32.662	27.9699	21.7238	21.5287	112.876	-0.321502	0.214645	-1.49783	0.134178	0.281743
ENST00000264718	GPN1	22.2631	21.4109	23.1824	24.1065	612.246	0.138761	0.0918839	1.51018	0.130999	0.537907	GPN1	69.9523	74.6592	78.0075	76.4949	387.086	0.240775	0.115198	2.0901	0.0366088	0.102242
ENST00000264731	TP63	5.12395	5.42123	4.20569	4.05676	250.404	-0.327898	0.144628	-2.26718	0.0233791	0.187641	TP63	7.98279	8.97378	11.7785	11.689	90.0901	0.595805	0.237051	2.51341	0.0119571	0.0406299
ENST00000264758	ADD1	28.0409	28.4639	27.8569	27.4658	1219.27	-0.00646707	0.0643366	-0.100519	0.919932	0.986063	ADD1	46.6675	46.5773	47.4238	45.0318	466.392	0.129634	0.105075	1.23373	0.217305	0.396727
ENST00000264771	TMEM175	3.42972	3.6582	1.99805	2.52679	55.8383	-0.623438	0.306753	-2.03238	0.0421157	0.281443	TMEM175	6.90412	6.12332	2.17464	3.35549	30.637	-1.0869	0.425417	-2.55491	0.0106214	0.0368287
ENST00000264775	PLPP1	12.6532	10.1749	11.3823	11.2461	189.928	0.0113294	0.171314	0.0661323	0.947272	0.992343	PPAP2A	54.2097	60.7879	21.2991	21.0654	145.007	-1.28925	0.19894	-6.48058	9.14e-11	1.08e-09
ENST00000264808	PRDM5	1.64051	1.53312	1.65502	1.51701	91.1747	0.0232975	0.236606	0.0984655	0.921563	0.986063	PRDM5	1.76746	2.22666	1.20441	1.07376	13.2126	-0.49753	0.632323	-0.786829	0.431382	0.625221
ENST00000264819	MIER2	1.12773	1.12768	0.884786	0.777954	72.6178	-0.415796	0.266251	-1.56167	0.118366	0.514533	MIER2	8.81093	7.46443	7.42537	7.44735	56.6759	0.0212177	0.298676	0.0710391	0.943367	0.972891
ENST00000264833	OLFM2	1.65947	1.61892	0.93624	0.780152	27.1138	-0.909585	0.442617	-2.05502	0.0398775	0.271008	OLFM2	6.43817	5.25277	0.928513	2.04877	22.2223	-1.93165	0.547769	-3.52639	0.000421265	0.00216379
ENST00000264866	TBC1D19	2.50637	2.25839	2.61918	2.6898	80.6081	0.180058	0.250839	0.717823	0.472866	0.871375	TBC1D19	5.68921	6.26725	7.69359	7.71636	48.5976	0.545367	0.320547	1.70136	0.0888747	0.205194
ENST00000264883	NUP54	20.8566	21.1464	21.4326	21.618	515.7	0.0595807	0.0995182	0.598691	0.549379	0.904548	NUP54	32.8064	35.6925	41.905	40.6948	254.673	0.410619	0.141353	2.90492	0.00367344	0.0148387
ENST00000264896	SCARB2	23.868	26.0604	22.2156	22.7511	1200.23	-0.126954	0.067859	-1.87085	0.0613655	0.355672	SCARB2	81.0954	83.6396	15.5213	22.1126	312.621	-1.97338	0.147967	-13.3366	1.42e-40	5.87e-39
ENST00000264904	USO1	29.5452	27.7061	29.1553	30.855	1307.35	0.0919344	0.0645105	1.42511	0.154126	0.582129	USO1	24.2469	26.5998	26.1678	25.7238	330.985	0.136552	0.123495	1.10572	0.268846	0.461001
ENST00000264908	ANXA3	33.2125	33.7817	31.3871	32.4118	504.79	-0.0464602	0.100904	-0.460442	0.645199	0.939384	ANXA3	92.8632	78.6088	104.407	101.313	401.24	0.414459	0.117506	3.52712	0.000420099	0.00215959
ENST00000264914	ARSB	6.75375	6.7703	7.59692	6.62255	362.946	0.0963684	0.121867	0.790768	0.429079	0.852626	ARSB	11.6207	14.0806	3.32174	3.33157	54.6478	-1.81219	0.338468	-5.35409	8.6e-08	7.79e-07
ENST00000264917	PDE8B	1.55041	1.27594	1.8866	1.51624	100.091	0.2918	0.233243	1.25105	0.210915	0.669108	PDE8B	0.157274	0	0	0	11.2785	-0.527249	1.12255	-0.469689	0.638577	0.789675
ENST00000264926	RAD18	9.22248	9.97547	10.0945	10.8648	634.261	0.15069	0.092325	1.63217	0.102643	0.474639	RAD18	18.4177	16.7202	11.7522	12.9827	98.0871	-0.376512	0.228189	-1.65	0.0989433	0.222793
ENST00000264930	SLC12A7	3.16082	4.14743	3.30896	2.71437	190.313	-0.254901	0.180613	-1.41131	0.158154	0.589151	SLC12A7	10.9242	9.32608	4.04807	3.43543	98.6117	-1.33671	0.243348	-5.493	3.95e-08	3.71e-07
ENST00000264932	SDHA	72.1904	73.7651	70.2699	71.6694	2089.73	-0.0162134	0.0491985	-0.329551	0.741739	0.961733	SDHA	105.753	108.062	113.512	114.485	974.601	0.227887	0.0741548	3.07312	0.00211833	0.00912835
ENST00000264933	PDCD6	87.682	87.2364	87.2286	86.3719	1042.81	0.0131252	0.0695611	0.188686	0.850339	0.977985	PDCD6	271.816	292.678	223.352	218.258	636.169	-0.222885	0.0927831	-2.40222	0.016296	0.0523305
ENST00000264935	CEP72	6.59691	6.52754	6.08075	5.63655	158.366	-0.139585	0.180806	-0.772017	0.440104	0.857905	CEP72	6.13112	5.63721	3.77892	5.6198	46.4726	-0.235449	0.334599	-0.703676	0.481635	0.670446
ENST00000264951	XRN1	5.61549	5.11576	5.40449	5.37311	588.119	0.0302434	0.0953317	0.317244	0.751059	0.964192	XRN1	5.46632	5.13921	4.89249	5.15479	116.238	0.0495021	0.208471	0.237453	0.812305	0.900872
ENST00000264954	GRPEL1	23.9643	20.8215	24.1459	26.6776	684.136	0.206483	0.093876	2.19953	0.0278404	0.210821	GRPEL1	106.154	103.755	130.154	137.164	347.355	0.492292	0.120801	4.07523	4.6e-05	0.000282497
ENST00000264956	EVC	4.53922	5.03488	5.17967	4.42777	332.326	0.0290553	0.130103	0.223325	0.823283	0.973193	EVC	1.4031	1.83834	1.61479	1.87529	22.1392	0.197403	0.478189	0.412814	0.679743	0.818957
ENST00000264968	MGAT4A	0.649331	0.98849	0.709897	0.622679	67.4571	-0.273474	0.29083	-0.940323	0.347052	0.800145	MGAT4A	1.69106	0.52441	0.315174	0.790266	5.08709	-1.33819	1.13881	-1.17508	0.239964	0.424859
ENST00000264977	PPP2R3A	2.13295	1.85413	2.28937	1.96219	149.795	0.116667	0.189863	0.614479	0.538899	0.902131	PPP2R3A	1.93652	2.13469	1.61287	1.47058	26.4311	-0.305064	0.437084	-0.697953	0.485207	0.67372
ENST00000264982	CEP70	6.69622	7.16092	8.56533	6.29414	204.112	0.124777	0.171361	0.728149	0.466522	0.870289	CEP70	6.17832	7.16672	5.64884	5.52392	49.7106	-0.207454	0.319657	-0.648987	0.516347	0.695706
ENST00000264990	ACAD11	5.23546	4.32476	4.61533	4.38754	161.642	-0.0626496	0.183498	-0.341419	0.732788	0.961608	ACAD11	5.53179	6.92407	7.24192	7.69698	69.8782	0.404067	0.270885	1.49165	0.13579	0.283693
ENST00000264993	CDV3	50.3854	49.6419	51.92	52.2661	1820.81	0.0828057	0.0524543	1.57863	0.114422	0.503659	CDV3	90.3637	87.2671	76.793	85.5417	287.741	0.0296613	0.132809	0.223338	0.823273	0.907616
ENST00000265000	GALNT7	18.0785	19.3085	18.0668	19.598	859.67	0.0347292	0.0797477	0.435489	0.663208	0.946343	GALNT7	35.2734	35.2301	12.7041	9.65279	196.584	-1.52299	0.17614	-8.64647	5.31e-18	9.81e-17
ENST00000265022	DGKG	3.77467	3.71817	4.01815	3.78262	239.239	0.0821378	0.146814	0.559467	0.575843	0.916529	DGKG	3.78321	4.43362	2.98439	2.99322	36.919	-0.271914	0.371434	-0.732066	0.464128	0.655421
ENST00000265026	MAP3K13	0.671525	0.679785	0.607269	0.649845	69.2889	-0.0801995	0.269586	-0.297491	0.766092	0.96685	MAP3K13	0.432258	0.726086	0.610934	1.13795	9.21047	0.746823	0.774914	0.96375	0.335172	0.533939
ENST00000265036	DEPDC1B	14.3269	14.5873	15.1399	14.9713	398.49	0.0825602	0.113339	0.728437	0.466346	0.870289	DEPDC1B	20.5229	22.5402	12.4312	11.3491	116.792	-0.750463	0.21467	-3.49589	0.000472485	0.00240296
ENST00000265038	ERCC8	10.9796	12.1134	12.808	12.4428	262.951	0.152916	0.141175	1.08317	0.278734	0.748641	ERCC8	15.9925	15.0553	14.4773	12.5983	75.1344	-0.0506547	0.259259	-0.195382	0.845094	0.920914
ENST00000265052	MGLL	23.9241	23.8174	23.7992	24.1144	1196.99	0.0292265	0.0648519	0.450665	0.652231	0.941869	MGLL	55.3636	52.4369	36.6326	35.9306	187.276	-0.345629	0.164198	-2.10495	0.0352954	0.0992903
ENST00000265056	MCM2	57.9932	55.5634	57.798	59.4763	2137.1	0.0705089	0.0494729	1.4252	0.154098	0.582129	MCM2	61.9721	55.5533	67.5218	69.0311	762.024	0.355014	0.0865437	4.10214	4.09e-05	0.000254462
ENST00000265062	RAB7A	30.4435	31.2649	27.2991	27.778	687.552	-0.139973	0.0864241	-1.61961	0.105316	0.480866	RAB7A	404.786	424.567	404.439	384.802	1095.36	0.0756022	0.0717164	1.05418	0.291799	0.488923
ENST00000265069	ZFR	49.1664	47.4492	51.1383	52.0701	2541.59	0.119268	0.0449749	2.65188	0.00800442	0.0844128	ZFR	50.7372	50.5477	40.035	37.5553	631.522	-0.229765	0.091971	-2.49823	0.0124814	0.0422146
ENST00000265070	GOLPH3	30.9726	29.293	30.7437	30.3497	876.153	0.0437152	0.0769999	0.567731	0.570218	0.913882	GOLPH3	76.3661	77.6717	56.8661	60.1557	263.803	-0.287171	0.137912	-2.08227	0.0373177	0.103778
ENST00000265073	SUB1	52.2441	53.4501	55.0803	54.1331	1998.36	0.0712941	0.0502582	1.41856	0.156028	0.585248	SUB1	722.239	710.788	784.671	781.666	1262.39	0.272622	0.0653826	4.16964	3.05e-05	0.000194824
ENST00000265074	NPR3.00	7.17792	7.56114	8.11165	7.49155	610.075	0.106237	0.0933718	1.13778	0.255213	0.7238	NPR3	13.893	11.798	7.48028	10.7847	78.6276	-0.411331	0.266095	-1.5458	0.122152	0.262051
ENST00000265077	VCAN	99.5784	99.2232	97.0271	96.6555	13059.8	-0.0135972	0.0190291	-0.714547	0.474889	0.872108	VCAN	0.65577	0.640264	0.173782	0.199195	17.8568	-1.64519	0.581018	-2.83157	0.00463205	0.0180973
ENST00000265080	RASGRF2	0.549159	0.472063	0.507617	0.643768	49.7022	0.197109	0.321058	0.613936	0.539258	0.902131	RASGRF2	0.675119	0.396911	0.272624	0.820292	8.98473	0.266426	0.80496	0.330981	0.740659	0.859694
ENST00000265081	MSH3	10.2447	9.82127	8.83988	9.31203	457.546	-0.120596	0.106778	-1.12941	0.258725	0.727215	MSH3	9.30362	10.302	9.34294	8.92437	141.614	0.0406297	0.187594	0.216584	0.828533	0.910717
ENST00000265085	CPEB4	9.98707	9.3706	10.0354	10.1797	1004.86	0.0865612	0.0722269	1.19846	0.230737	0.695812	CPEB4	11.3603	12.4116	10.2929	10.5553	105.754	-0.0685325	0.218216	-0.314057	0.753477	0.866342
ENST00000265087	STC2	9.52596	9.60187	9.1812	8.86677	536.319	-0.0598	0.0978643	-0.61105	0.541167	0.902725	STC2	34.3359	36.2312	12.0043	9.51982	87.6365	-1.66148	0.264465	-6.28243	3.33e-10	3.77e-09
ENST00000265094	FBXW11	23.6762	25.1055	25.3709	26.8205	1182.19	0.121521	0.0672918	1.80589	0.0709362	0.386776	FBXW11	42.5009	45.0345	27.5326	27.7701	251.374	-0.5483	0.142598	-3.84507	0.000120518	0.000689651
ENST00000265097	THOC3	59.2962	57.3909	57.9598	59.0797	1001.17	0.028385	0.0714461	0.397292	0.691152	0.954573	THOC3	121.144	137.282	127.784	139.485	609.875	0.173972	0.0982909	1.76997	0.0767321	0.183096
ENST00000265104	DNAH5	0.460004	0.423395	0.356028	0.396309	68.8876	-0.207651	0.272002	-0.763417	0.445215	0.860148	DNAH5	0.30101	0.379217	0.255261	0.402311	20.1182	-0.0723735	0.501468	-0.144323	0.885245	0.941932
ENST00000265107	WDR70	10.0267	9.85581	10.2934	8.61384	300.77	-0.0485326	0.135338	-0.358604	0.719891	0.960728	WDR70	19.7927	17.5886	25.7825	20.6871	180.391	0.457228	0.172334	2.65316	0.00797426	0.0288447
ENST00000265113	SLC1A3	4.94191	5.48382	5.57364	6.77906	240.811	0.268744	0.153065	1.75575	0.079131	0.412834	SLC1A3	1.28401	1.81173	5.1332	5.14839	23.9765	1.94546	0.497905	3.9073	9.33e-05	0.000544666
ENST00000265132	AMBP	2.71964	2.71952	2.57961	2.49624	35.7614	-0.0757007	0.372514	-0.203216	0.838966	0.975918	AMBP	4.94272	5.97783	1.6766	0.480446	14.8389	-2.23874	0.699682	-3.19966	0.00137592	0.0062372
ENST00000265138	ARRDC3	36.9749	35.1998	34.5343	35.5726	1625.67	-0.017903	0.0568307	-0.315023	0.752744	0.964633	ARRDC3	16.4738	12.7065	7.33121	10.6209	64.391	-0.566214	0.293919	-1.92643	0.0540508	0.139242
ENST00000265140	SLF1	6.85015	7.24503	7.61795	7.27893	436.431	0.103852	0.109218	0.950866	0.341672	0.799384	ANKRD32	5.65694	6.62948	5.97653	6.95329	87.908	0.220301	0.243869	0.903356	0.366337	0.564111
ENST00000265148	CENPE	11.6727	12.275	11.5454	11.1881	1074.55	-0.0510261	0.0696413	-0.732699	0.463742	0.869665	CENPE	4.38019	4.18087	4.43238	3.9759	150.303	0.114857	0.182576	0.629093	0.529288	0.706693
ENST00000265164	CASP6	7.8518	7.75144	7.51943	7.51897	134.949	-0.0291583	0.194752	-0.14972	0.880985	0.981012	CASP6	25.1772	32.317	26.4724	21.0675	102.592	-0.111764	0.228376	-0.489384	0.62457	0.780256
ENST00000265174	PAPSS1	16.9421	16.1935	17.8438	17.0487	460.941	0.0985667	0.106093	0.929062	0.352857	0.804415	PAPSS1	36.4697	38.4421	37.0203	37.2653	310.494	0.126876	0.12668	1.00155	0.316563	0.516719
ENST00000265239	IQCG	3.11205	3.22174	2.72888	3.011	72.6151	-0.118001	0.264144	-0.446729	0.655071	0.942854	IQCG	3.14192	3.48325	3.99659	4.19929	21.8527	0.391812	0.478204	0.819341	0.412592	0.608809
ENST00000265245	LSG1	21.3569	22.1524	22.2953	23.2535	788.311	0.0901321	0.0809803	1.11301	0.265703	0.73421	LSG1	26.9701	24.0906	29.3416	26.9867	232.171	0.276103	0.147923	1.86653	0.0619666	0.154656
ENST00000265260	PCNP	48.7451	47.5271	48.0265	45.8637	1171.22	-0.0121137	0.066382	-0.182485	0.855202	0.978878	PCNP	203.307	205.691	213.141	211.871	488.803	0.213113	0.102334	2.08253	0.0372937	0.103734
ENST00000265271	RBM27	13.8636	14.563	14.2815	15.0356	1017.68	0.0685547	0.0718914	0.953587	0.340293	0.798017	RBM27	2.75748	2.38211	2.22703	2.47293	33.7634	0.0225765	0.384656	0.0586927	0.953197	0.97766
ENST00000265295	SPDL1	39.9385	41.5523	41.3997	39.4872	1106.96	0.01331	0.0685915	0.194048	0.846139	0.977061	SPDL1	35.3144	34.3164	26.6165	28.093	246.788	-0.208624	0.141995	-1.46924	0.141767	0.292579
ENST00000265299	MINDY4	3.25918	3.67763	3.76563	3.4196	104.056	0.074807	0.223214	0.335136	0.737522	0.961608	FAM188B	2.84993	2.687	2.78431	2.79255	27.2305	0.109227	0.427263	0.255642	0.798227	0.893514
ENST00000265316	ABCB6	15.9598	14.451	12.4749	13.9542	456.344	-0.178426	0.110694	-1.61188	0.106988	0.484196	ABCB6	16.6132	16.9935	8.31074	7.93363	137.004	-0.89693	0.196338	-4.5683	4.92e-06	3.59e-05
ENST00000265322	PECR	7.00321	8.57856	6.58101	8.66166	155.12	-0.00765906	0.195489	-0.0391789	0.968748	0.995107	PECR	38.1272	39.1209	37.0069	37.1164	152.331	0.118946	0.179742	0.661758	0.508127	0.690273
ENST00000265334	CDKL3	0.625211	0.809061	0.567137	0.803395	16.797	-0.0414888	0.555642	-0.0746682	0.940479	0.990719	CDKL3	1.64579	1.06632	0.996896	0.999846	9.18909	-0.351983	0.760649	-0.462741	0.64355	0.792995
ENST00000265339	UBE2B	8.42348	7.87616	9.09098	9.41843	210.396	0.207451	0.15681	1.32295	0.185852	0.637713	UBE2B	175.357	175.811	145.877	165.223	331.692	-0.0554438	0.125415	-0.442084	0.658428	0.803672
ENST00000265340	PITX1	11.819	10.21	4.94294	6.06596	207.559	-0.976705	0.170107	-5.74171	9.37e-09	4.57e-07	PITX1	7.75724	9.38177	8.32349	8.88671	35.4314	0.121122	0.376832	0.321422	0.747891	0.863602
ENST00000265342	FSTL4	8.17793	7.8747	7.94034	7.33658	455.625	-0.0474276	0.107443	-0.441421	0.658908	0.944483	FSTL4	3.47141	2.58235	0.801035	1.00426	21.2191	-1.73486	0.540756	-3.20821	0.00133564	0.00608133
ENST00000265343	AFF4	15.5279	15.0902	15.6487	15.835	1596.59	0.0642524	0.056347	1.1403	0.254162	0.7224	AFF4	29.3813	26.898	17.5432	18.613	348.644	-0.489086	0.12255	-3.99092	6.58e-05	0.000394877
ENST00000265350	MED20	13.4219	13.6192	17.333	16.103	404.337	0.330281	0.113508	2.90976	0.00361711	0.0449048	MED20	36.1099	32.754	32.2124	32.7066	94.5424	0.0540502	0.230582	0.234408	0.814668	0.902102
ENST00000265351	XPO5	17.2403	16.5334	18.6435	18.741	1021.5	0.17057	0.0707945	2.40937	0.0159803	0.141373	XPO5	23.6988	23.011	26.0489	29.5674	409.639	0.391627	0.11391	3.43805	0.000585923	0.00289549
ENST00000265354	SRF	8.59486	8.13096	9.67994	8.1654	394.407	0.117489	0.119641	0.982019	0.32609	0.786716	SRF	10.5486	9.11266	11.4514	11.8182	72.513	0.305782	0.26289	1.16315	0.244767	0.431484
ENST00000265361	SEMA3C	84.9882	83.442	83.5121	85.5753	4434.67	0.0296554	0.0338017	0.877335	0.380305	0.824911	SEMA3C	65.0528	69.1125	15.0431	16.101	398.867	-1.97806	0.12851	-15.3923	1.84e-53	1.11e-51
ENST00000265362	SEMA3A	11.6439	11.8952	12.5298	11.9725	1050.85	0.0818987	0.069935	1.17107	0.241571	0.709411	SEMA3A	23.6492	26.1091	14.3249	13.9286	193.982	-0.693599	0.164257	-4.22265	2.41e-05	0.000157683
ENST00000265371	NRP1	102.767	105.596	108.925	108.918	6759.2	0.0882324	0.0272988	3.2321	0.00122885	0.0187491	NRP1	95.0785	88.9097	15.5282	16.2154	634.036	-2.41086	0.110425	-21.8325	1.14e-105	1.81e-103
ENST00000265395	HIBADH	30.4596	29.9361	28.9099	30.8651	608.342	0.00913586	0.0925081	0.0987575	0.921331	0.986063	HIBADH	86.9919	98.3211	81.5488	90.5983	394.64	0.0330456	0.118211	0.279548	0.779824	0.883006
ENST00000265421	POLB	11.9094	11.2754	13.1065	13.1871	172.15	0.205564	0.172818	1.18948	0.23425	0.701611	POLB	14.7497	14.4467	19.1268	15.902	73.3038	0.385547	0.262738	1.46742	0.142261	0.293404
ENST00000265433	NBN	30.8941	29.8945	29.4159	28.8515	1497.24	-0.0370808	0.0584302	-0.634617	0.525678	0.897918	NBN	36.2736	35.7211	36.6755	34.6532	355.151	0.118103	0.118964	0.992764	0.320825	0.520873
ENST00000265437	ST7	6.53975	6.25759	6.37552	7.02713	204.789	0.0907122	0.15963	0.568264	0.569856	0.913882	ST7	15.2273	11.5101	10.953	9.97356	90.3945	-0.25386	0.245061	-1.03591	0.300245	0.498424
ENST00000265462	PRDX5	175.885	182.339	178.159	176.439	1652.46	0.00936268	0.0555655	0.168498	0.866191	0.979578	PRDX5	497.236	498.518	531.067	553.186	1490.47	0.274188	0.0607575	4.51283	6.4e-06	4.57e-05
ENST00000265465	POLA2	16.5098	16.1632	16.7419	17.7483	641.794	0.102132	0.0898934	1.13615	0.255895	0.724567	POLA2	27.465	30.261	31.4396	32.9467	240.272	0.280942	0.14394	1.9518	0.0509616	0.133594
ENST00000265471	B3GAT3	22.6246	23.4115	21.1187	18.5139	335.109	-0.192045	0.126753	-1.51511	0.129745	0.536205	B3GAT3	44.8723	44.387	16.1068	16.6593	132.281	-1.32281	0.205865	-6.42561	1.31e-10	1.53e-09
ENST00000265560	USP4	3.67433	4.23634	3.81872	3.94749	171.984	-0.00252915	0.175581	-0.0144044	0.988507	0.997979	USP4	8.96116	11.2166	9.45521	9.74661	125.038	0.0693781	0.204544	0.339184	0.734471	0.855031
ENST00000265562	PTPN23	1.99733	1.91922	1.9852	1.96502	111.062	0.0363832	0.214242	0.169823	0.86515	0.979578	PTPN23	8.08238	7.11688	5.51409	5.63378	142.678	-0.320809	0.189779	-1.69043	0.0909455	0.208846
ENST00000265563	PRKAR2A	15.2939	16.6149	17.1304	17.2103	1159.75	0.130012	0.0681561	1.90756	0.056448	0.339123	PRKAR2A	23.4275	24.8267	14.608	13.3954	103.308	-0.590044	0.223232	-2.64319	0.00821298	0.0295615
ENST00000265564	EXOSC7	25.096	27.6043	26.5057	29.1242	304.358	0.102106	0.13264	0.769799	0.441419	0.857936	EXOSC7	63.1364	55.6781	63.7387	68.8672	244.769	0.30445	0.145363	2.09441	0.0362238	0.101419
ENST00000265565	SCAP	17.6539	17.0576	15.8238	15.8475	760.956	-0.108199	0.0821511	-1.31707	0.187814	0.641054	SCAP	10.1751	8.77434	5.73485	5.88405	128.493	-0.574715	0.201406	-2.85352	0.00432383	0.0170707
ENST00000265593	CLCN2	0.755722	1.23429	1.00353	1.06821	35.5243	0.0821718	0.387763	0.211912	0.832175	0.975453	CLCN2	0.929981	1.0935	1.68993	1.60077	15.8939	0.799115	0.569497	1.40319	0.160559	0.319902
ENST00000265594	MCCC1	7.59245	8.42458	8.08795	7.8735	211.54	0.0190334	0.157395	0.120928	0.903748	0.984803	MCCC1	6.52739	7.54609	7.79131	8.28089	72.095	0.324766	0.264179	1.22934	0.218944	0.399073
ENST00000265627	PON3	23.7403	22.5043	23.1897	20.5432	288.812	-0.0565407	0.135901	-0.416043	0.677379	0.949701	PON3	48.7548	60.2331	15.0041	15.7651	160.822	-1.71785	0.201389	-8.53003	1.46e-17	2.66e-16
ENST00000265641	CPT1A	20.5779	21.903	21.6125	20.4083	1193.11	0.00832927	0.0672611	0.123835	0.901446	0.984803	CPT1A	37.3626	38.8355	27.9212	25.816	328.826	-0.361981	0.124351	-2.91096	0.00360325	0.0145837
ENST00000265651	FBXO3	11.7324	11.5959	12.1053	11.7987	305.991	0.0592105	0.129438	0.457444	0.647352	0.94077	FBXO3	39.8944	38.2717	39.559	33.9311	236.197	0.0311131	0.147155	0.211431	0.832551	0.913172
ENST00000265686	TCIRG1	28.3014	27.8407	20.0741	19.4825	687.283	-0.481134	0.0871952	-5.51789	3.43e-08	1.52e-06	TCIRG1	22.8904	26.4503	10.0561	12.9385	195.092	-0.975725	0.17174	-5.68141	1.34e-08	1.33e-07
ENST00000265689	CHKA	11.2913	10.9295	11.4921	10.8336	325.913	0.0308243	0.126061	0.244519	0.806829	0.969552	CHKA	16.5989	19.3384	15.3121	13.8772	98.9187	-0.160219	0.22854	-0.701054	0.483269	0.671781
ENST00000265709	ANK1	1.75428	1.68674	1.84563	2.14278	169.899	0.237019	0.176444	1.34331	0.179171	0.627329	ANK1	0.697036	0.739482	0.577763	0.445748	15.4378	-0.409192	0.578752	-0.707025	0.479551	0.668165
ENST00000265717	PRKAR2B	5.20572	5.3384	4.69706	4.44059	195.607	-0.182506	0.162775	-1.12122	0.262196	0.731302	PRKAR2B	8.65757	8.55774	4.03392	3.43898	33.7899	-1.17329	0.40417	-2.90297	0.00369638	0.014907
ENST00000265720	DUS4L	3.53417	4.61586	4.26362	4.12434	101.032	0.0655847	0.231561	0.283229	0.777001	0.968264	DUS4L	2.41492	2.65514	3.72342	2.66746	57.7051	0.287394	0.29579	0.971613	0.331243	0.529792
ENST00000265727	ADAM22	0.961064	0.989287	0.690171	0.835419	27.0614	-0.330314	0.43257	-0.763609	0.4451	0.860062	ADAM22	0.921769	0.774171	0.558337	0.186663	7.45802	-1.16026	0.898408	-1.29147	0.196542	0.369044
ENST00000265728	DBF4	16.0978	15.9853	16.176	16.3474	636.591	0.0437038	0.0894441	0.488616	0.625114	0.933956	DBF4	13.3198	13.2163	13.2593	12.4203	115.609	0.108607	0.2076	0.523153	0.600868	0.763314
ENST00000265729	SRI	34.4764	37.8085	38.9234	37.4583	805.706	0.103581	0.0820959	1.2617	0.207056	0.663297	SRI	283.295	268.515	267.404	270.331	715.054	0.11224	0.0868063	1.29299	0.196014	0.368277
ENST00000265734	CDK6	24.0117	24.5385	22.383	23.078	2941.97	-0.070804	0.0417289	-1.69676	0.089742	0.443354	CDK6	46.7515	46.2579	26.6375	30.607	157.378	-0.555095	0.180384	-3.07729	0.00208892	0.00902763
ENST00000265742	ANKIB1	16.6402	16.1368	16.4314	16.8444	1128.96	0.045824	0.067265	0.681247	0.495715	0.883666	ANKIB1	10.7362	10.6273	9.83217	8.85185	142.809	-0.0306854	0.18734	-0.163795	0.869893	0.935061
ENST00000265748	ANLN	74.3086	73.7872	74.8489	76.1983	3815.39	0.0525077	0.0360904	1.45489	0.145698	0.567152	ANLN	33.93	35.6316	47.105	43.182	590.541	0.512582	0.0972945	5.26836	1.38e-07	1.22e-06
ENST00000265753	EIF4H	182.258	179.627	180.395	175.563	5183.74	0.000210479	0.0312597	0.00673323	0.994628	0.99897	EIF4H	546.646	529.726	568.405	561.563	1809.78	0.215623	0.0550136	3.91945	8.88e-05	0.000519886
ENST00000265807	SH2D4A	19.5566	18.558	18.0474	18.0463	655.196	-0.0545641	0.08896	-0.613356	0.539641	0.902183	SH2D4A	38.7823	38.1598	35.0978	39.1129	229.728	0.128427	0.147275	0.872023	0.383196	0.581934
ENST00000265843	EXPH5	1.11031	1.00716	0.876483	0.621654	100.285	-0.475173	0.237078	-2.00428	0.0450396	0.294249	EXPH5	0.629806	0.211583	1.82267	1.57298	28.2125	2.16293	0.487629	4.43562	9.18e-06	6.38e-05
ENST00000265849	PMS2	15.2591	14.6487	16.3306	16.5152	861.895	0.15922	0.0771229	2.0645	0.0389702	0.267051	PMS2	19.5379	19.203	20.2459	18.442	231.869	0.164846	0.146111	1.12822	0.259225	0.449859
ENST00000265857	GET4	10.557	11.143	9.49656	8.44088	223.139	-0.25068	0.154303	-1.62459	0.104249	0.479188	GET4	59.378	65.85	51.8229	48.356	243.573	-0.193824	0.143779	-1.34808	0.177634	0.344336
ENST00000265866	HNRNPH3	29.9763	28.6125	25.1425	22.8963	671.759	-0.262402	0.0898325	-2.92101	0.00348895	0.0437111	HNRNPH3	183.236	176.161	182.751	195.022	847.248	0.214603	0.0808237	2.6552	0.00792614	0.0287042
ENST00000265872	CCAR1	39.6313	38.4191	37.8983	39.7896	1955.51	0.0173205	0.0518566	0.334008	0.738374	0.961733	CCAR1	31.6499	32.0814	31.0843	30.5146	474.067	0.0878545	0.103974	0.844967	0.398129	0.595847
ENST00000265896	SQLE	33.8793	32.3881	33.965	33.0057	1063.91	0.03926	0.0697307	0.563024	0.573419	0.915537	SQLE	45.7087	40.8131	39.6575	36.2393	308.432	-0.0476375	0.13004	-0.366329	0.71412	0.842914
ENST00000265909	SNX19	11.5919	12.5542	12.4379	12.9513	872.813	0.0964708	0.0784488	1.22973	0.218798	0.678965	SNX19	11.2949	11.525	9.60374	8.01259	129.484	-0.264576	0.19844	-1.33328	0.18244	0.350698
ENST00000265960	MAPKAP1	37.1118	34.0783	36.3142	38.1197	1322.78	0.0883132	0.0650891	1.35681	0.174843	0.620492	MAPKAP1	39.9963	36.0105	36.017	28.1861	238.657	-0.110748	0.15098	-0.733532	0.463234	0.654545
ENST00000265963	GTF2H1	18.829	19.4521	17.9906	17.6757	600.233	-0.0780269	0.0925607	-0.84298	0.399239	0.838757	GTF2H1	25.7801	25.8545	23.6927	26.3859	184.532	0.118076	0.165296	0.714335	0.47502	0.664899
ENST00000265965	SERGEF	8.95471	8.2222	9.19152	8.612	136.845	0.0757151	0.194556	0.389168	0.697152	0.956201	SERGEF	13.2197	13.6298	12.8856	11.2621	79.0321	0.0625359	0.251171	0.248977	0.803378	0.895887
ENST00000265970	PIK3C2A	15.7537	16.3589	16.8494	16.9504	1462.08	0.0979162	0.0590432	1.65838	0.0972403	0.461389	PIK3C2A	14.9011	12.6884	13.3014	11.0337	287.505	-0.0496292	0.139327	-0.356206	0.721686	0.847288
ENST00000265978	FAM160A2	6.73751	6.71374	6.78781	5.42991	240.772	-0.114743	0.152605	-0.751893	0.452115	0.86427	FAM160A2	4.51723	3.91247	7.35352	4.71675	67.7776	0.685918	0.291202	2.35547	0.0184993	0.058362
ENST00000265981	RNF141	12.1297	11.8466	12.3455	11.8002	525.261	0.034194	0.0990979	0.345052	0.730055	0.961608	RNF141	41.7561	38.1195	22.7268	31.6175	102.911	-0.380613	0.228906	-1.66275	0.0963628	0.218412
ENST00000265986	IDE	32.8733	30.8615	32.4274	32.568	2045.5	0.0522853	0.051251	1.02018	0.307643	0.772412	IDE	36.0602	39.3031	36.487	36.346	496.821	0.105899	0.103762	1.02059	0.307447	0.506646
ENST00000265990	BTAF1	17.4057	17.1907	17.6884	17.7018	1367.75	0.0567647	0.0605905	0.936858	0.348832	0.801276	BTAF1	6.32326	6.71431	8.20747	8.09456	176.978	0.466101	0.167039	2.79037	0.00526476	0.0202374
ENST00000265993	TCTN3	28.216	27.8561	27.5789	27.3084	817.702	-0.00677504	0.0788175	-0.0859586	0.931499	0.98834	TCTN3	41.8675	43.2062	20.0993	19.2117	250.599	-0.967767	0.145306	-6.66018	2.73e-11	3.37e-10
ENST00000266014	GLT8D1	14.5847	15.247	15.4484	16.2993	307.012	0.113851	0.129857	0.876736	0.38063	0.824911	GLT8D1	20.8218	23.443	7.72643	4.78633	68.2677	-1.72472	0.305982	-5.63667	1.73e-08	1.71e-07
ENST00000266022	RBM6	14.6103	13.6867	13.4234	14.2036	547.187	-0.0105378	0.0983047	-0.107195	0.914634	0.986019	RBM6	6.81682	4.74678	5.9309	6.40024	88.2252	0.246177	0.251229	0.979891	0.32714	0.525944
ENST00000266025	TMEM115	17.2203	15.5519	15.351	15.7986	362.991	-0.0492276	0.121114	-0.406456	0.684408	0.951769	TMEM115	24.9823	31.5729	10.0882	15.659	93.9028	-0.950515	0.254204	-3.73919	0.000184618	0.00102245
ENST00000266031	HYAL1	0.811668	0.714236	0.959612	1.04299	23.9684	0.416241	0.457237	0.910341	0.362643	0.810636	HYAL1	0.639941	0.967447	0.775255	0.194387	3.58947	-0.576621	1.30501	-0.441854	0.658595	0.803717
ENST00000266037	DOCK3	0.45955	0.522602	0.578977	0.590521	52.6397	0.275926	0.308393	0.894723	0.370935	0.817987	DOCK3	0.308543	0.241862	0.083063	0.291581	6.24734	-0.490955	0.96757	-0.50741	0.611867	0.771305
ENST00000266068	GMEB2	4.62457	4.51683	3.80072	3.63925	203.606	-0.273087	0.159717	-1.70982	0.0872987	0.436246	GMEB2	10.5047	11.1165	8.11275	8.13675	64.9185	-0.323381	0.279017	-1.159	0.246456	0.434021
ENST00000266069	GID8	13.3922	12.7931	12.8114	12.3059	604.113	-0.0360511	0.0927749	-0.388587	0.697582	0.956201	GID8	83.3291	81.2146	63.6015	63.4188	217.765	-0.211131	0.150744	-1.40059	0.161335	0.320773
ENST00000266070	DIDO1	9.9027	10.6457	9.49225	9.3692	910.545	-0.0995358	0.0763384	-1.30388	0.192276	0.64709	DIDO1	4.66028	4.69687	5.57041	5.73789	152.676	0.420328	0.179873	2.33681	0.0194492	0.0609552
ENST00000266077	SLC2A4RG	19.7288	20.7316	14.767	14.7217	444.61	-0.432306	0.108803	-3.97329	7.09e-05	0.00159176	SLC2A4RG	17.0837	20.1176	19.171	19.6647	97.0266	0.202437	0.229545	0.881904	0.377829	0.575759
ENST00000266079	PRPF6	39.3977	39.8251	35.7058	36.1861	1240.72	-0.116047	0.0638197	-1.81836	0.0690085	0.379597	PRPF6	34.464	33.6165	35.39	39.179	442.424	0.27525	0.108693	2.53235	0.0113299	0.0388935
ENST00000266087	FBXO7	37.2495	36.4941	38.0807	38.6391	835.683	0.0811156	0.0780062	1.03986	0.298404	0.763321	FBXO7	50.9286	56.4344	59.9207	52.3225	372.872	0.189599	0.121816	1.55644	0.119603	0.257833
ENST00000266126	EIF2B2	11.9047	12.2839	12.3949	14.4435	592.287	0.174031	0.0981643	1.77286	0.0762522	0.40323	EIF2B2	61.6627	67.742	75.4217	75.8858	328.704	0.387537	0.123339	3.14204	0.00167775	0.00743938
ENST00000266254	TTLL1	1.50634	1.64748	0.907387	0.846843	22.9135	-0.822216	0.479581	-1.71445	0.0864468	0.433705	TTLL1	4.77119	2.65305	1.19587	3.19843	16.2211	-0.637417	0.605325	-1.05302	0.292334	0.489361
ENST00000266263	MTFP1	37.6498	37.5039	36.2408	37.7215	455.404	0.000987698	0.106256	0.00929542	0.992583	0.998729	MTFP1	55.3394	68.4498	62.9778	63.1641	138.415	0.144715	0.192495	0.751788	0.452178	0.644728
ENST00000266269	PATZ1	7.38511	7.38478	7.57617	7.87227	317.344	0.0888425	0.127184	0.698537	0.484841	0.879222	PATZ1	10.3327	12.6599	7.36323	7.38501	85.532	-0.496865	0.248397	-2.00029	0.0454693	0.121983
ENST00000266304	TEF	1.82799	1.92117	2.20529	1.96546	93.5738	0.177774	0.233802	0.760364	0.447037	0.861304	TEF	3.67491	4.6297	2.78247	2.79071	13.2872	-0.382563	0.624527	-0.612565	0.540164	0.716268
ENST00000266483	ALG10	7.01328	6.25557	6.88563	6.27239	207.513	0.0119166	0.160276	0.0743501	0.940732	0.990719	ALG10	11.7706	9.78696	4.63432	4.11172	46.4815	-1.11166	0.346428	-3.20891	0.0013324	0.0060688
ENST00000266503	ARNTL2	16.6933	17.5486	17.6476	17.3257	427.498	0.0545359	0.109925	0.496119	0.61981	0.932152	ARNTL2	7.11255	6.28612	11.7979	12.4976	80.6243	0.968026	0.254162	3.8087	0.000139701	0.000789936
ENST00000266529	ZCRB1	27.9326	28.3382	26.428	25.2067	525.722	-0.100009	0.0991308	-1.00886	0.313041	0.777274	ZCRB1	88.836	98.907	108.786	104.821	285.917	0.328853	0.132996	2.47265	0.0134116	0.0445725
ENST00000266534	TMEM117	1.08958	1.29566	1.1353	1.32443	36.2475	0.0684293	0.372477	0.183714	0.854238	0.978839	TMEM117	3.3849	3.27501	0.656101	1.15157	13.913	-1.75906	0.672622	-2.61523	0.00891665	0.0317164
ENST00000266542	C1RL	9.4828	8.86983	8.72238	9.50902	328.889	0.014473	0.126813	0.114129	0.909135	0.985351	C1RL	23.2931	21.8917	10.0409	8.3343	101.512	-1.13782	0.233799	-4.86666	1.13e-06	8.94e-06
ENST00000266544	NDUFA9	11.5987	11.4123	13.4348	12.7176	1108.01	0.208652	0.0683342	3.05341	0.0022626	0.0313056	NDUFA9	38.0272	39.07	36.8991	39.2513	1025.72	0.195783	0.0732753	2.67188	0.0075428	0.0276064
ENST00000266551	KLRG1	0.979401	0.734518	0.865291	0.550606	11.2546	-0.251611	0.688047	-0.365689	0.714597	0.960539	KLRG1	2.14134	3.59692	1.72941	3.03543	6.32441	-0.253515	0.935378	-0.27103	0.786368	0.886471
ENST00000266556	TAPBPL	1.65181	2.9823	2.1227	1.65089	40.3291	-0.272253	0.379192	-0.717983	0.472768	0.871338	TAPBPL	3.4202	3.59692	7.20589	5.60109	30.7806	0.989522	0.411595	2.40412	0.0162116	0.0521023
ENST00000266581	AMIGO2	126.954	124.625	124.634	124.403	5077.99	0.00938288	0.0312551	0.300203	0.764022	0.966732	AMIGO2	241.578	245.221	58.7901	59.6121	1012.55	-1.89998	0.0816036	-23.2831	6.58e-120	1.29e-117
ENST00000266604	LLPH	7.19057	7.20083	7.75925	7.66366	621.281	0.123906	0.0905092	1.36899	0.171003	0.613541	LLPH	214.715	219.119	250.966	233.355	388.373	0.307833	0.115346	2.66877	0.00761288	0.0278054
ENST00000266643	MARCHF9	2.00116	2.0559	2.2546	2.43059	70.2937	0.231717	0.267392	0.866583	0.386171	0.829392	2020-03-09	2.41365	1.2163	0.731002	2.68827	8.69463	0.178645	0.799094	0.22356	0.8231	0.907616
ENST00000266659	GLIPR1	14.4962	14.1019	18.9901	17.7965	1025.48	0.387292	0.071644	5.40579	6.45e-08	2.74e-06	GLIPR1	55.9888	50.6273	11.7272	10.8082	108.949	-2.03768	0.247282	-8.24031	1.72e-16	2.98e-15
ENST00000266671	PHLDA1	31.2433	30.29	35.3867	35.1764	2874.95	0.22158	0.0420047	5.27512	1.33e-07	5.38e-06	PHLDA1	122.006	129.785	137.712	150.139	722.004	0.327008	0.0882614	3.70499	0.000211399	0.00115325
ENST00000266673	TMEM19	11.0411	11.4159	11.6663	11.035	689.28	0.0396448	0.0868538	0.456454	0.648063	0.940862	TMEM19	58.616	55.7362	12.2951	15.8547	153.077	-1.83821	0.204197	-9.00216	2.21e-19	4.43e-18
ENST00000266679	CPSF6	54.3692	52.3138	53.4733	55.6371	1296.77	0.0564936	0.0632512	0.893163	0.37177	0.817987	CPSF6	67.5815	65.2492	64.9523	64.5693	510.11	0.0767777	0.100908	0.760872	0.446734	0.640058
ENST00000266682	SLC6A15	1.63472	1.89006	1.81626	1.83803	92.8861	0.0761191	0.235424	0.323328	0.746447	0.963236	SLC6A15	3.52734	3.07463	1.96336	1.27417	22.9546	-1.04463	0.495731	-2.10725	0.0350962	0.0988422
ENST00000266712	TMTC3	17.055	17.3611	16.9087	17.3457	1331.32	0.0172462	0.0616976	0.279527	0.77984	0.968264	TMTC3	32.0557	29.3912	6.82589	7.21614	221.72	-2.00912	0.171498	-11.7151	1.07e-31	3.46e-30
ENST00000266732	TMPO	52.7159	52.9623	50.5466	48.0163	1989.74	-0.0765254	0.0510669	-1.49853	0.133995	0.542334	TMPO	91.0532	95.3054	85.2808	82.8526	809.466	-0.00104114	0.0816198	-0.012756	0.989822	0.996191
ENST00000266736	AMDHD1	1.90897	1.39496	2.12294	1.41521	41.0687	0.122783	0.36267	0.338552	0.734947	0.961608	AMDHD1	8.00489	7.2445	9.69751	7.34428	46.2768	0.315699	0.331271	0.952994	0.340593	0.538559
ENST00000266771	SLC15A4	10.6641	10.3666	11.2611	10.2298	315.363	0.0552582	0.128951	0.42852	0.668272	0.947494	SLC15A4	28.1028	30.633	5.69852	8.06016	133.953	-1.95924	0.223824	-8.75349	2.07e-18	3.92e-17
ENST00000266987	TARBP2	19.0497	19.4818	19.3339	19.8195	316.237	0.047143	0.127391	0.370064	0.711335	0.959656	TARBP2	25.0993	25.488	29.7154	28.1861	131.591	0.315287	0.193854	1.62642	0.103861	0.231594
ENST00000267085	CSAD	1.54478	1.48292	1.70724	1.31013	43.1011	0.0190811	0.343052	0.0556215	0.955643	0.993183	CSAD	1.33834	1.34884	1.13493	2.43919	11.1475	0.557166	0.701853	0.79385	0.427283	0.621079
ENST00000267101	ERBB3	0.731727	0.524611	0.53226	0.58545	37.8626	-0.144677	0.370164	-0.390846	0.695911	0.956201	ERBB3	1.50388	1.88155	2.57576	2.14231	35.9461	0.546673	0.375542	1.45569	0.145479	0.298153
ENST00000267102	LMBR1L	2.9802	2.84081	2.46968	2.89901	88.4723	-0.0926593	0.241527	-0.38364	0.701246	0.956291	LMBR1L	5.97736	4.73337	3.27581	4.15011	28.7191	-0.395985	0.425589	-0.930441	0.352143	0.550236
ENST00000267103	C12orf10	36.7802	34.4672	35.0341	33.8089	453.862	-0.025501	0.107369	-0.237508	0.812262	0.970471	C12orf10	71.6295	66.9687	75.1157	79.6108	369.912	0.310029	0.117186	2.6456	0.00815455	0.0293939
ENST00000267113	ESYT1	41.0079	39.9095	41.9238	42.7138	1596.67	0.0888848	0.0563753	1.57666	0.114873	0.504733	ESYT1	34.297	32.2366	26.1857	25.656	433.341	-0.243971	0.109623	-2.22555	0.0260444	0.0774147
ENST00000267116	ANKRD52	11.6069	12.0488	11.4801	11.4794	1090.72	-0.0190443	0.0684385	-0.278269	0.780806	0.968264	ANKRD52	36.0903	39.1767	23.9763	24.0473	432.341	-0.51184	0.111591	-4.58674	4.5e-06	3.31e-05
ENST00000267163	RB1	13.2475	12.1729	12.4668	11.4144	636.838	-0.0660877	0.0931288	-0.709638	0.477929	0.873453	RB1	21.598	21.9187	23.3485	21.413	271.177	0.152267	0.135545	1.12336	0.261283	0.452479
ENST00000267202	VPS37B	7.51957	6.91529	5.62718	5.85968	188.91	-0.305543	0.16692	-1.83048	0.0671785	0.375033	VPS37B	17.0932	16.489	13.9036	12.7579	56.2376	-0.13377	0.299187	-0.447111	0.654795	0.801607
ENST00000267205	RHOF	20.136	19.1284	20.7873	20.1823	526.753	0.0853634	0.099198	0.860536	0.389494	0.832738	RHOF	62.0075	55.846	37.5594	36.0676	132.531	-0.504808	0.196246	-2.57233	0.0101017	0.0352734
ENST00000267294	ZIC5	2.07864	1.83194	1.83363	1.65243	92.4538	-0.141771	0.236969	-0.598268	0.549661	0.904548	ZIC5	2.62419	2.64479	1.14447	1.14785	16.6499	-1.02751	0.572193	-1.79573	0.0725372	0.175333
ENST00000267328	RAB20	1.78946	1.51826	1.53306	1.25425	24.7431	-0.222961	0.453195	-0.491974	0.622737	0.933047	RAB20	3.27149	3.29717	3.60295	4.33633	11.0706	0.425228	0.681892	0.623601	0.53289	0.709813
ENST00000267339	ANKRD10	17.5229	18.7339	19.5298	19.0657	503.567	0.114228	0.101763	1.12249	0.261654	0.730637	ANKRD10	17.3984	19.205	14.453	17.113	94.4142	-0.0294978	0.233324	-0.126424	0.899396	0.949987
ENST00000267415	TINF2	18.0589	20.4174	17.2012	19.8239	366.496	-0.0314014	0.124666	-0.251884	0.801131	0.968325	TINF2	23.6093	24.2613	24.8627	25.3113	147.887	0.186918	0.182427	1.02462	0.305543	0.504581
ENST00000267425	NOP9	11.734	12.0579	12.4211	11.5865	778.942	0.037064	0.0820461	0.451746	0.651452	0.941512	NOP9	16.3041	14.8882	18.9563	20.076	146.987	0.435164	0.18488	2.35377	0.0185841	0.0585998
ENST00000267430	FANCM	4.74429	3.94194	4.46214	4.31461	335.71	0.0389663	0.130332	0.298977	0.764958	0.96685	FANCM	2.3447	1.6439	2.30532	2.39472	58.5691	0.413323	0.301601	1.37043	0.170552	0.333961
ENST00000267436	L2HGDH	5.85908	5.53706	5.58242	6.06448	378.64	0.0554372	0.11806	0.469569	0.638663	0.936881	L2HGDH	17.8869	17.7243	17.4809	15.3411	103.445	-0.0382274	0.221285	-0.172752	0.862847	0.930763
ENST00000267460	PELI2	3.1457	3.41002	3.47009	3.46988	213.638	0.106222	0.155776	0.68189	0.495308	0.883666	PELI2	6.95935	3.50699	1.60588	2.41595	19.2103	-1.32524	0.581291	-2.27982	0.0226183	0.0688834
ENST00000267569	JDP2	6.0568	6.87369	6.42444	7.04175	120.987	0.082625	0.207882	0.397461	0.691028	0.95455	JDP2	11.9989	16.5272	14.0515	9.71936	29.8126	-0.150825	0.420577	-0.358614	0.719884	0.846588
ENST00000267584	AK7	1.64284	2.01612	1.82329	1.85516	64.9364	0.031728	0.281015	0.112905	0.910106	0.985435	AK7	4.42781	4.55958	3.96474	4.32733	41.1679	0.0252175	0.347449	0.072579	0.942141	0.972296
ENST00000267615	ITPK1	13.589	13.2582	11.8456	12.5067	853.713	-0.11668	0.0780501	-1.49493	0.134933	0.544476	ITPK1	35.3011	35.2394	37.4706	33.4966	193.132	0.138888	0.160581	0.864906	0.38709	0.585479
ENST00000267620	FBLN5	1.07924	0.84312	1.04018	0.996779	25.8676	0.107544	0.441371	0.243658	0.807495	0.969577	FBLN5	1.85014	3.15558	0.344822	0.864605	10.8317	-2.12535	0.808169	-2.62983	0.00854278	0.0305621
ENST00000267622	TRIP11	9.40959	9.36013	8.57265	8.5301	966.252	-0.110142	0.0724178	-1.52092	0.128279	0.533365	TRIP11	3.7276	4.25305	3.36554	2.43549	89.9045	-0.370589	0.247779	-1.49564	0.134747	0.282258
ENST00000267750	EMC4	86.37	84.2813	86.1555	85.635	940.686	0.0336334	0.073486	0.457684	0.647179	0.94063	EMC4	290.924	287.075	271.355	252.751	666.964	0.00874654	0.0902577	0.0969064	0.922801	0.962906
ENST00000267807	ZNF280D	7.94907	7.94872	7.20643	6.45385	344.635	-0.194809	0.124051	-1.5704	0.116322	0.508516	ZNF280D	0.78195	0.788089	1.20564	0.690978	72.5885	0.118578	0.267121	0.443911	0.657107	0.803379
ENST00000267812	MFAP1	22.0397	21.4387	21.332	21.9988	478.08	0.0191312	0.103737	0.184419	0.853685	0.978815	MFAP1	31.2299	34.5107	36.297	27.5441	186.946	0.113981	0.170932	0.666823	0.504885	0.688046
ENST00000267814	SORD	16.588	16.5364	16.0203	16.5206	852.791	-0.00159575	0.0773081	-0.0206414	0.983532	0.997793	SORD	65.6948	66.9964	74.3902	76.5052	340.535	0.316835	0.121268	2.61268	0.00898364	0.0319162
ENST00000267838	LYSMD2	7.61514	7.16687	8.3058	9.62098	112.688	0.302315	0.215025	1.40595	0.159738	0.593147	LYSMD2	27.5137	21.8575	30.9786	25.5642	75.3721	0.338982	0.2648	1.28014	0.200495	0.373688
ENST00000267842	SLC27A2	12.7857	12.6137	12.4221	12.5094	323.429	-0.00279202	0.12588	-0.02218	0.982304	0.997763	SLC27A2	38.6132	44.9122	17.2697	13.0929	228.212	-1.35003	0.166336	-8.11627	4.81e-16	8.11e-15
ENST00000267859	BNIP2	22.9458	22.3118	22.9788	23.9071	1571.31	0.0750281	0.0572746	1.30997	0.190206	0.645012	BNIP2	53.915	55.6282	42.0576	41.7932	279.177	-0.263246	0.133774	-1.96785	0.0490855	0.129774
ENST00000267884	SRP14	70.3263	68.2055	70.9484	72.3517	850.264	0.0728581	0.0775309	0.93973	0.347356	0.800239	SRP14	871.455	886.548	992.49	963.717	1683.91	0.317815	0.0567537	5.59989	2.14e-08	2.09e-07
ENST00000267889	DISP2	0.187904	0.168458	0.224818	0.158195	25.1448	0.128052	0.450504	0.284242	0.776225	0.968264	DISP2	0.397394	0.450577	0.962843	0.784625	12.3022	1.24423	0.662369	1.87846	0.0603185	0.151542
ENST00000267935	COMMD4	90.9406	88.5628	88.7053	79.3137	838.217	-0.0713598	0.081084	-0.880073	0.37882	0.824849	COMMD4	359.858	382.069	366.892	370.102	976.625	0.13765	0.075003	1.83527	0.0664663	0.163944
ENST00000267938	UBE2Q2	28.7447	28.771	28.1644	28.4811	913.326	0.00204255	0.0744451	0.0274369	0.978111	0.997232	UBE2Q2	31.9202	29.1782	19.7845	18.2646	118.882	-0.540112	0.208219	-2.59396	0.00948762	0.0334592
ENST00000267970	TSPAN3	55.2644	52.1983	54.8069	53.6457	3694.96	0.037257	0.0388069	0.96006	0.337025	0.795685	TSPAN3	472.026	465.197	168.618	167.78	1046.52	-1.33142	0.0761829	-17.4766	2.16e-68	1.78e-66
ENST00000267984	TLNRD1	4.45036	4.34941	3.43144	3.12911	201.24	-0.399622	0.161882	-2.4686	0.0135642	0.124977	MESDC1	2.69146	2.51884	6.05534	5.3725	19.9271	1.28488	0.516805	2.48619	0.0129119	0.043351
ENST00000268042	ARRDC4	0.543182	0.362106	0.439501	0.336069	18.3938	-0.199152	0.534742	-0.372427	0.709575	0.959467	ARRDC4	0.665967	0.671195	1.00848	1.82064	5.75931	1.23231	1.00727	1.22341	0.221173	0.402248
ENST00000268057	BBS4	12.0243	11.1294	11.6636	10.8967	303.979	-0.0134332	0.131633	-0.10205	0.918717	0.986063	BBS4	20.516	23.6503	17.7065	21.3433	143.064	-0.0349286	0.192339	-0.181599	0.855898	0.92654
ENST00000268058	PML	1.48313	1.45369	1.2832	1.20765	81.3676	-0.213587	0.250007	-0.854321	0.392927	0.835398	PML	8.75837	7.47523	12.9044	13.5178	124.119	0.852583	0.20425	4.17421	2.99e-05	0.000191374
ENST00000268099	SCAMP2	26.4178	26.883	26.8852	27.3544	711.168	0.0492289	0.0846544	0.581529	0.560884	0.909665	SCAMP2	102.169	105.53	72.0085	71.9646	379.442	-0.410143	0.116182	-3.53016	0.000415303	0.00213937
ENST00000268122	RHCG	1.13033	1.17214	1.29117	1.02211	24.2883	0.0307805	0.455072	0.0676386	0.946073	0.991768	RHCG	21.7934	20.793	5.1043	3.88369	79.7107	-2.07594	0.29086	-7.13726	9.52e-13	1.31e-11
ENST00000268138	TICRR	9.31796	9.19717	9.05034	8.77134	664.799	-0.0310369	0.0877758	-0.353593	0.723644	0.961246	TICRR	5.17397	5.10442	7.06253	7.34906	155.447	0.647552	0.179194	3.6137	0.000301859	0.0016016
ENST00000268150	MFGE8	24.5241	22.9191	24.301	25.1131	505.574	0.0827539	0.101754	0.813272	0.416062	0.84683	MFGE8	168.859	169.822	27.6673	25.7827	484.485	-2.51611	0.126027	-19.9649	1.11e-88	1.23e-86
ENST00000268154	ZNF710	3.37291	3.04073	2.51533	2.40289	142.683	-0.358986	0.192361	-1.86621	0.062012	0.357402	ZNF710	4.82124	5.38725	3.04731	4.20245	37.4263	-0.262129	0.369462	-0.709489	0.478021	0.667065
ENST00000268182	IQGAP1	81.0269	81.08	81.1698	83.9048	6355.17	0.0502124	0.0283323	1.77227	0.07635	0.40323	IQGAP1	18.5219	20.4028	44.8766	42.4068	695.463	1.30247	0.0917919	14.1894	1.07e-45	5.22e-44
ENST00000268184	CRTC3	5.34447	5.35991	4.95467	4.3099	280.501	-0.184376	0.138134	-1.33477	0.181953	0.631509	CRTC3	12.1423	13.0308	9.53413	8.60611	88.4101	-0.269916	0.239615	-1.12646	0.259972	0.450965
ENST00000268206	EFL1	20.9512	21.1073	22.6288	22.5986	857.444	0.128837	0.0768036	1.67748	0.0934477	0.451979	EFTUD1	16.5906	16.7835	17.3887	17.9687	253.609	0.232059	0.13912	1.66806	0.0953046	0.216647
ENST00000268261	PMM2	39.1606	38.8013	39.2944	37.4538	952.9	0.00139764	0.0734401	0.019031	0.984816	0.997979	PMM2	97.6007	98.9372	104.529	108.62	330.308	0.289704	0.122722	2.36064	0.0182432	0.0576628
ENST00000268379	UQCRC2	126.591	125.945	126.139	124.046	2593.72	0.0105353	0.0438727	0.240135	0.810226	0.969636	UQCRC2	241.196	241.077	256.649	277.008	1520.5	0.290857	0.0618209	4.70483	2.54e-06	1.92e-05
ENST00000268383	CDR2	10.5775	10.154	10.486	10.796	306.277	0.061844	0.129695	0.476841	0.633475	0.934753	CDR2	21.154	20.7021	14.2991	17.6939	109.682	-0.245598	0.21661	-1.13383	0.256868	0.44702
ENST00000268482	DHX38	17.6556	17.9384	17.9276	17.6107	828.934	0.0217793	0.0783201	0.278081	0.78095	0.968264	DHX38	18.4335	14.8626	14.9104	17.4354	266.324	0.0891805	0.147557	0.604382	0.54559	0.72043
ENST00000268483	TXNL4B	8.68728	8.71931	8.12293	7.1644	222.062	-0.163266	0.154196	-1.05882	0.289682	0.757734	TXNL4B	41.1022	40.9542	42.4374	43.1305	82.2782	0.189256	0.24614	0.768893	0.441957	0.635492
ENST00000268533	NUDT7	4.7719	4.32434	4.79083	4.79053	55.195	0.0989862	0.300937	0.328927	0.742211	0.961898	NUDT7	17.5446	22.6923	23.3798	17.0538	63.5991	0.175812	0.292068	0.601957	0.547203	0.721787
ENST00000268655	ZNF174	3.9879	3.35634	3.58733	4.65471	103.369	0.190423	0.230852	0.82487	0.409445	0.844666	ZNF174	7.18164	5.51468	4.76439	6.85609	32.5446	0.029777	0.398626	0.0746992	0.940454	0.971943
ENST00000268668	NDUFB10	143.583	160.162	144.065	136.433	1062.72	-0.0908179	0.0739117	-1.22874	0.219171	0.679562	NDUFB10	468.138	482.823	374.979	393.787	968.218	-0.168086	0.0754473	-2.22786	0.0258896	0.0770656
ENST00000268676	DEF8	11.5613	11.3633	10.2337	10.7968	441.217	-0.100374	0.108369	-0.92623	0.354326	0.80551	DEF8	31.2627	26.5764	24.6999	26.4245	184.97	-0.0153704	0.168536	-0.0911996	0.927334	0.96544
ENST00000268695	GALNS	11.5396	11.33	9.63234	8.78057	260.617	-0.288683	0.142046	-2.03233	0.0421206	0.281443	GALNS	37.9965	38.4291	5.6529	5.18366	144.183	-2.6674	0.233126	-11.4419	2.58e-30	7.98e-29
ENST00000268699	GAS8	7.76513	7.92325	7.56895	6.85576	251.069	-0.0971205	0.144389	-0.672631	0.501182	0.885612	GAS8	9.90034	7.63028	9.70082	9.72952	58.7764	0.314865	0.296007	1.06371	0.287462	0.483553
ENST00000268711	MED9	11.505	10.9126	9.93577	10.7433	256.547	-0.0924255	0.142807	-0.647205	0.517499	0.894342	MED9	22.4034	19.6968	13.2815	10.425	30.9325	-0.693092	0.411539	-1.68415	0.0921533	0.211072
ENST00000268712	NCOR1	25.0156	24.1291	24.9662	23.6894	2822.15	0.00960097	0.0438802	0.2188	0.826806	0.973579	NCOR1	17.484	16.0977	11.4715	10.9164	442.264	-0.458599	0.110175	-4.16245	3.15e-05	0.000200382
ENST00000268717	COPS3	97.6661	94.4184	105.304	103.909	1963.04	0.147265	0.0509508	2.89034	0.00384831	0.0471122	COPS3	196.935	188.035	208.281	206.299	1125.05	0.246526	0.069868	3.52845	0.000418008	0.00215062
ENST00000268720	CPNE7	7.62749	7.53489	6.00763	7.94381	208.457	-0.0960271	0.166668	-0.576158	0.564509	0.911137	CPNE7	4.61758	5.54028	6.52628	5.20976	45.7824	0.314172	0.334899	0.93811	0.348188	0.545918
ENST00000268766	NEK8	1.46376	1.60091	1.26382	1.64581	57.5305	-0.0508273	0.299586	-0.169658	0.865279	0.979578	NEK8	1.40796	1.82445	0.97467	1.95511	13.8017	0.0101863	0.623885	0.0163273	0.986973	0.995052
ENST00000268797	GFOD2	6.31721	6.88383	5.77634	5.20359	131.44	-0.24174	0.199883	-1.20941	0.226506	0.689813	GFOD2	8.31507	7.65163	6.13156	5.71044	35.185	-0.285291	0.37908	-0.752587	0.451698	0.644414
ENST00000268802	NOB1	35.5257	34.9051	30.1092	31.576	610.809	-0.167246	0.0920918	-1.81608	0.0693586	0.380593	NOB1	109.12	106.742	140.378	141.204	678.831	0.522958	0.0884561	5.91206	3.38e-09	3.54e-08
ENST00000268835	PRPSAP2	24.9998	27.4192	29.1231	29.3359	585.496	0.181386	0.0953068	1.90318	0.0570169	0.34092	PRPSAP2	59.9749	53.983	65.1167	57.5181	290.073	0.258752	0.134893	1.91821	0.0550849	0.141206
ENST00000268989	SGSM2	12.9832	12.8654	11.453	11.8614	646.197	-0.124823	0.0891855	-1.39959	0.161635	0.596189	SGSM2	3.57569	3.6705	4.17133	3.62048	51.3779	0.256676	0.313044	0.819935	0.412253	0.608591
ENST00000269025	LRRC46	0.563577	0.476852	0.501397	0.668489	11.2372	0.193225	0.680067	0.284127	0.776313	0.968264	LRRC46	2.38483	2.18504	1.31322	1.58053	7.89794	-0.574793	0.827707	-0.694441	0.487406	0.675595
ENST00000269081	ABCA10	0.154138	0.218352	0.346638	0.198067	15.7539	0.572312	0.585153	0.978056	0.328046	0.788488	ABCA10	0.0902055	0.0909137	0.273198	0.274007	3.74289	1.747	1.29867	1.34523	0.178552	0.345477
ENST00000269097	G6PC3	40.4063	39.445	37.4711	35.0028	629.23	-0.115823	0.0912136	-1.2698	0.204154	0.659179	G6PC3	133.958	131.563	70.6636	65.2517	453.011	-0.836286	0.10962	-7.62893	2.37e-14	3.59e-13
ENST00000269141	CDH2	21.0198	21.4055	22.3575	21.1534	930.432	0.0604892	0.0745706	0.811167	0.41727	0.84748	CDH2	15.3628	14.1673	5.58337	5.50656	120.075	-1.30451	0.216809	-6.01684	1.78e-09	1.91e-08
ENST00000269143	AFG3L2	36.7217	37.3666	35.2598	37.9825	1254.96	0.00747611	0.065049	0.11493	0.9085	0.985351	AFG3L2	21.9172	24.9934	21.8971	22.174	239.929	0.0695011	0.145263	0.47845	0.63233	0.785751
ENST00000269159	IMPA2	38.5753	34.9644	30.2217	31.5968	528.341	-0.226458	0.101522	-2.23062	0.025706	0.199311	IMPA2	40.5962	36.7747	26.0538	28.4797	125.022	-0.317654	0.20174	-1.57457	0.115356	0.250728
ENST00000269187	SLC39A6	36.872	37.4891	35.4271	37.1917	1412.76	-0.01016	0.0604262	-0.16814	0.866473	0.979578	SLC39A6	30.8793	29.3566	11.8368	14.7837	213.048	-1.06404	0.161854	-6.57405	4.9e-11	5.9e-10
ENST00000269195	GALNT1	31.6084	30.6724	32.5937	32.6736	1322.98	0.0916061	0.0618963	1.47999	0.138875	0.552509	GALNT1	55.2765	58.9727	18.0985	15.4293	263.636	-1.63221	0.152146	-10.7279	7.53e-27	2.07e-25
ENST00000269209	GAREM1	1.71484	1.51691	1.53977	1.79393	131.589	0.0688412	0.201179	0.342188	0.732209	0.961608	GAREM	1.66834	1.92164	1.05867	1.83403	19.184	-0.282667	0.525761	-0.537634	0.59083	0.756959
ENST00000269214	ESCO1	5.86306	6.50007	6.90272	6.99589	317.875	0.192947	0.128738	1.49876	0.133935	0.542334	ESCO1	2.15409	2.004	1.50552	2.51662	22.7065	0.047214	0.479978	0.098367	0.921641	0.962182
ENST00000269216	GATA6	0.876856	0.898204	0.659607	1.04431	35.8288	-0.0349386	0.382334	-0.0913825	0.927189	0.986994	GATA6	1.75446	1.65035	4.10917	3.41076	21.798	1.32193	0.495034	2.67038	0.00757655	0.0276972
ENST00000269221	RMC1	8.28331	7.50294	9.59454	9.21211	205.305	0.276598	0.159544	1.73368	0.0829752	0.424123	C18orf8	12.0756	12.8109	15.3989	14.1574	117.586	0.400339	0.206055	1.94287	0.052032	0.135739
ENST00000269228	NPC1	21.5113	21.27	24.4446	23.3181	1162.35	0.18294	0.066439	2.75351	0.00589604	0.0662	NPC1	44.871	44.5646	12.2703	10.7187	461.391	-1.79996	0.118784	-15.1533	7.21e-52	4.15e-50
ENST00000269298	SAT2	29.5693	25.7152	28.6718	22.6828	262.09	-0.0823787	0.15109	-0.54523	0.585596	0.919412	SAT2	74.9154	78.8042	70.4228	64.6623	158.327	-0.0896133	0.177191	-0.505745	0.613036	0.771918
ENST00000269305	TP53	39.4176	40.5883	36.7288	37.4594	1071.65	-0.0848743	0.0690348	-1.22944	0.218906	0.679082	TP53	165.395	169.192	188.998	178.154	910.393	0.283195	0.0777394	3.64288	0.000269603	0.00144406
ENST00000269346	TTYH2	0.904548	0.714085	0.642387	0.764699	27.9854	-0.178046	0.4268	-0.417166	0.676557	0.949534	TTYH2	1.69422	2.10157	3.78917	3.64203	19.9981	1.07256	0.510142	2.10248	0.0355112	0.0998521
ENST00000269373	FN3KRP	22.4256	23.9943	23.4583	24.3214	462.721	0.0657056	0.106312	0.618046	0.536545	0.901039	FN3KRP	82.4312	83.9863	83.4904	81.5482	343.114	0.121852	0.120661	1.00987	0.312557	0.512105
ENST00000269383	TRIM65	18.86	19.2456	16.075	16.8187	647.277	-0.188147	0.0894548	-2.10326	0.0354428	0.250161	TRIM65	14.8071	13.024	8.15367	7.85068	72.9968	-0.638921	0.2681	-2.38314	0.0171656	0.054754
ENST00000269385	CBX8	9.30008	8.77697	6.60542	6.49306	314.899	-0.440731	0.129454	-3.40455	0.00066273	0.0111931	CBX8	16.638	14.2443	13.8709	12.8251	74.0492	-0.0764836	0.263187	-0.290606	0.771353	0.877453
ENST00000269392	CEP131	4.4052	4.13804	2.40165	2.20138	129.841	-0.868178	0.205114	-4.23265	2.31e-05	0.000589481	CEP131	1.9278	2.78487	2.33543	2.18618	32.2714	0.157466	0.397603	0.396037	0.692078	0.828383
ENST00000269397	CBX4	21.7815	21.5056	14.6432	14.9956	525.049	-0.522411	0.0999506	-5.22669	1.73e-07	6.75e-06	CBX4	18.6411	20.4157	14.0013	15.7037	125.563	-0.234832	0.202318	-1.1607	0.245762	0.43296
[truncated: 8,691 more rows]

## Sheet: Sheet1
ENST	gene.name.x	X7.1rpkm	X7.2rpkm	X10.1rpkm	X10.2rpkm	baseMean	log2FoldChange.x	lfcSE.x	stat.x	pvalue.x	padj.x	gene.name.y	TG1	TG2	CT1	CT2	Reads	log2FoldChange.y	lfcSE.y	stat.y	pvalue.y	padj.y
[truncated: 10,291 more rows]

[truncated: 6 more sheets: RNA-up, RNA-down, Ribo-up, Ribo-down, Ribo-only-up, Ribo-only-down]
